# Supplementary material for: Radiotherapy and Cisplatin Increase Immunotherapy Efficacy by Enabling Local and Systemic Intratumoral T-cell Activity
Source: Oxford University Press journal article supplement (doi:10.1158/2326-6066.cir-18-0654), 2019-02-19
Supplement: 23266066cir180654-sup-209004_2_supp_5302685_plw0tj.xlsx [file 23266066cir180654-sup-209004_2_supp_5302685_plw0tj.xlsx]

## Sheet: CTLs
Table S1A: Differentially expressed genes within CTLs
ensembl ID	gene symbol	log2-fold change	Adjusted p-value
		(Irr vs Non-Irr)
ENSMUSG00000095079	Igha	-2.23615	0.00899848
ENSMUSG00000028005	Gucy1b3	-1.68134	0.00643374
ENSMUSG00000020279	Il9r	-1.50841	0.00552519
ENSMUSG00000078566	Bnip3	-1.42722	6.46747e-06
ENSMUSG00000022240	Ctnnd2	-1.28288	0.00920718
ENSMUSG00000002847	Pla1a	-1.27086	0.0051305
ENSMUSG00000013418	B4galnt2	-1.25562	0.00587378
ENSMUSG00000022033	Pbk	-1.24139	2.39585e-07
ENSMUSG00000017390	Aldoc	-1.2257	0.00700016
ENSMUSG00000028456	Unc13b	-1.22526	4.73843e-05
ENSMUSG00000032053	Pou2af1	-1.17874	0.00102747
ENSMUSG00000051855	Mest	-1.12469	9.37045e-06
ENSMUSG00000032373	Car12	-1.10822	0.00172188
ENSMUSG00000027583	Zbtb46	-1.10033	0.000426436
ENSMUSG00000022425	Enpp2	-1.09722	0.000486099
ENSMUSG00000041498	Kif14	-1.08612	5.27388e-08
ENSMUSG00000035299	Mid1	-1.06568	7.7673e-05
ENSMUSG00000034303	Ccdc15	-1.05913	0.00880651
ENSMUSG00000035455	Fignl1	-1.03801	2.59683e-05
ENSMUSG00000027326	Knl1	-1.02358	9.80713e-06
ENSMUSG00000040274	Cdk6	-1.00604	2.95634e-09
ENSMUSG00000002565	Scin	-0.976062	0.000181296
ENSMUSG00000022322	Shcbp1	-0.962758	8.3806e-06
ENSMUSG00000033952	Aspm	-0.953374	7.85765e-09
ENSMUSG00000035365	Parpbp	-0.94898	0.000342675
ENSMUSG00000019845	Tube1	-0.946667	0.00699244
ENSMUSG00000042428	Mgat3	-0.927848	0.00203902
ENSMUSG00000019942	Cdk1	-0.925842	1.38592e-07
ENSMUSG00000021256	Vash1	-0.922572	0.00542329
ENSMUSG00000029378	Areg	-0.913553	1.57536e-08
ENSMUSG00000035683	Melk	-0.911724	0.000149889
ENSMUSG00000039395	Mreg	-0.909776	0.00986521
ENSMUSG00000028068	Iqgap3	-0.906789	0.00146158
ENSMUSG00000028175	Depdc1a	-0.905595	1.47751e-05
ENSMUSG00000020330	Hmmr	-0.902786	2.97175e-07
ENSMUSG00000069910	Spdl1	-0.901695	1.25031e-05
ENSMUSG00000033031	C330027C09Rik	-0.893519	1.5041e-06
ENSMUSG00000027715	Ccna2	-0.886186	7.98845e-08
ENSMUSG00000041431	Ccnb1	-0.88128	4.63386e-06
ENSMUSG00000028702	Rad54l	-0.880655	0.00102406
ENSMUSG00000036777	Anln	-0.87914	2.88678e-05
ENSMUSG00000029516	Cit	-0.878353	1.24977e-05
ENSMUSG00000041064	Pif1	-0.872428	0.00348424
ENSMUSG00000026683	Nuf2	-0.872053	1.04119e-05
ENSMUSG00000026274	Pask	-0.871245	0.00165657
ENSMUSG00000041782	Lad1	-0.867674	0.00149276
ENSMUSG00000058258	Idi1	-0.865858	1.33323e-07
ENSMUSG00000005233	Spc25	-0.862823	0.000124582
ENSMUSG00000101970	1810026B05Rik	-0.860848	0.00948547
ENSMUSG00000026779	Mastl	-0.843225	0.000223861
ENSMUSG00000021569	Trip13	-0.840608	1.704e-05
ENSMUSG00000047534	Mis18bp1	-0.838586	0.00040575
ENSMUSG00000037278	Tmem97	-0.835294	0.000277979
ENSMUSG00000020766	Galk1	-0.834561	0.00010782
ENSMUSG00000029910	Mad2l1	-0.832084	1.60621e-05
ENSMUSG00000001403	Ube2c	-0.831757	0.000264952
ENSMUSG00000026605	Cenpf	-0.828307	1.79708e-05
ENSMUSG00000027199	Gatm	-0.827955	0.00384973
ENSMUSG00000027379	Bub1	-0.82721	2.07355e-05
ENSMUSG00000024800	Rpp30	-0.825763	0.00334479
ENSMUSG00000025154	Arhgap19	-0.824537	0.000366358
ENSMUSG00000007682	Dio2	-0.822296	0.00615254
ENSMUSG00000030867	Plk1	-0.813169	0.00037405
ENSMUSG00000025912	Mybl1	-0.812006	0.00727968
ENSMUSG00000032586	Traip	-0.811016	0.00199917
ENSMUSG00000027699	Ect2	-0.809438	8.51305e-07
ENSMUSG00000040204	Pclaf	-0.809121	4.64745e-07
ENSMUSG00000031262	Cenpi	-0.807472	0.00190145
ENSMUSG00000024989	Cep55	-0.797902	5.76898e-05
ENSMUSG00000017716	Birc5	-0.796369	1.36964e-05
ENSMUSG00000054115	Skp2	-0.793174	0.0011723
ENSMUSG00000038843	Gcnt1	-0.78338	1.39476e-05
ENSMUSG00000034206	Polq	-0.77381	0.00102446
ENSMUSG00000027306	Nusap1	-0.773148	4.84843e-05
ENSMUSG00000020897	Aurkb	-0.769941	5.76898e-05
ENSMUSG00000025161	Slc16a3	-0.769302	1.24977e-05
ENSMUSG00000027533	Fabp5	-0.766981	0.00050079
ENSMUSG00000034731	Dgkh	-0.766892	3.67389e-05
ENSMUSG00000046516	Cox17	-0.75974	0.00497909
ENSMUSG00000058290	Espl1	-0.759307	6.59625e-06
ENSMUSG00000028933	Xrcc2	-0.757344	0.00432118
ENSMUSG00000056501	Cebpb	-0.753551	0.000132744
ENSMUSG00000034926	Dhcr24	-0.753126	0.000643719
ENSMUSG00000002055	Spag5	-0.752411	0.000165364
ENSMUSG00000022034	Esco2	-0.749223	0.00127938
ENSMUSG00000025758	Plk4	-0.749006	3.67899e-05
ENSMUSG00000031004	Mki67	-0.746658	3.50817e-07
ENSMUSG00000024165	Jpt2	-0.742622	0.000464896
ENSMUSG00000051747	Ttn	-0.738388	0.00116058
ENSMUSG00000012483	Rpa3	-0.73838	0.00035874
ENSMUSG00000004709	Cd244	-0.738218	9.5255e-06
ENSMUSG00000020534	Shmt1	-0.73816	0.00237835
ENSMUSG00000030528	Blm	-0.733578	0.00125785
ENSMUSG00000028312	Smc2	-0.73307	1.08744e-07
ENSMUSG00000079610	Ankrd39	-0.7302	0.000318811
ENSMUSG00000022021	Diaph3	-0.726601	1.75173e-06
ENSMUSG00000079685	Ulbp1	-0.724755	0.00152903
ENSMUSG00000028300	3110043O21Rik	-0.723342	0.00970138
ENSMUSG00000057363	Uxs1	-0.723282	2.44124e-06
ENSMUSG00000029414	Kntc1	-0.721549	0.00133079
ENSMUSG00000020328	Nudcd2	-0.712743	1.36964e-05
ENSMUSG00000039704	Lmbrd2	-0.711202	0.00050079
ENSMUSG00000026622	Nek2	-0.710102	0.00103244
ENSMUSG00000028613	Lrp8	-0.710038	0.000571364
ENSMUSG00000034855	Cxcl10	-0.708368	0.00157689
ENSMUSG00000042029	Ncapg2	-0.708076	1.80633e-05
ENSMUSG00000028044	Cks1b	-0.706659	0.000307965
ENSMUSG00000000028	Cdc45	-0.701966	0.00240328
ENSMUSG00000038510	Rpf2	-0.69592	0.000814492
ENSMUSG00000028614	Ndc1	-0.69529	3.30998e-05
ENSMUSG00000034023	Fancd2	-0.694506	0.000939037
ENSMUSG00000027323	Rad51	-0.693257	0.000372153
ENSMUSG00000043421	Hilpda	-0.692816	4.77967e-05
ENSMUSG00000001467	Cyp51	-0.686619	0.000533508
ENSMUSG00000022797	Tfrc	-0.685215	5.76813e-07
ENSMUSG00000015880	Ncapg	-0.684926	8.94801e-05
ENSMUSG00000030268	Bcat1	-0.683103	0.000799114
ENSMUSG00000034333	Zbed4	-0.680736	0.00128303
ENSMUSG00000017146	Brca1	-0.678281	0.000109046
ENSMUSG00000039748	Exo1	-0.67678	0.00390414
ENSMUSG00000032051	Fdx1	-0.673047	0.0015005
ENSMUSG00000074476	Spc24	-0.672604	0.00746257
ENSMUSG00000045328	Cenpe	-0.671427	0.000440866
ENSMUSG00000034329	Brip1	-0.669954	0.00102747
ENSMUSG00000040084	Bub1b	-0.668018	0.00044399
ENSMUSG00000027331	Knstrn	-0.667904	0.000799114
ENSMUSG00000009575	Cbx5	-0.667586	4.81902e-06
ENSMUSG00000006398	Cdc20	-0.667031	0.00146875
ENSMUSG00000020914	Top2a	-0.666702	1.85985e-05
ENSMUSG00000006715	Gmnn	-0.665697	0.00479902
ENSMUSG00000037544	Dlgap5	-0.66492	0.000892074
ENSMUSG00000003779	Kif20a	-0.664308	0.000327935
ENSMUSG00000060288	Ppih	-0.664149	0.00116857
ENSMUSG00000079553	Kifc1	-0.66274	0.00121183
ENSMUSG00000020899	Pfas	-0.662461	0.000891059
ENSMUSG00000023004	Tuba1b	-0.662287	2.88678e-05
ENSMUSG00000032113	Chek1	-0.661434	0.00112576
ENSMUSG00000043262	Uevld	-0.657954	0.00993495
ENSMUSG00000030677	Kif22	-0.650391	0.00877236
ENSMUSG00000067336	Bmpr2	-0.646024	0.00227686
ENSMUSG00000037313	Tacc3	-0.645298	0.000263473
ENSMUSG00000037944	Ccr7	-0.644925	0.00275962
ENSMUSG00000018362	Kpna2	-0.644489	5.94734e-06
ENSMUSG00000030254	Rad18	-0.644487	0.000385843
ENSMUSG00000029363	Rfc5	-0.643118	0.0001655
ENSMUSG00000027469	Tpx2	-0.639913	1.79708e-05
ENSMUSG00000026669	Mcm10	-0.628508	0.0045859
ENSMUSG00000001138	Cnnm3	-0.628203	0.00293813
ENSMUSG00000007080	Pole	-0.627258	0.0052119
ENSMUSG00000032397	Tipin	-0.626817	0.000197576
ENSMUSG00000027201	Myef2	-0.623785	0.000999157
ENSMUSG00000006442	Srm	-0.62169	0.00275427
ENSMUSG00000025747	Tyms	-0.62019	0.000471581
ENSMUSG00000035310	Lin54	-0.616978	3.88774e-07
ENSMUSG00000020185	E2f7	-0.615238	0.00355426
ENSMUSG00000041147	Brca2	-0.614619	0.00970138
ENSMUSG00000032815	Fanca	-0.614312	0.00736676
ENSMUSG00000025574	Tk1	-0.613707	0.00103732
ENSMUSG00000029276	Glmn	-0.609352	0.00453381
ENSMUSG00000023505	Cdca3	-0.608585	0.000707472
ENSMUSG00000028718	Stil	-0.604684	0.00471158
ENSMUSG00000031697	Orc6	-0.604575	0.000310697
ENSMUSG00000058392	Rrp1b	-0.602674	0.00011525
ENSMUSG00000073434	Wdr90	-0.598642	0.000839012
ENSMUSG00000022351	Sqle	-0.597434	0.00507064
ENSMUSG00000027200	Sema6d	-0.597072	6.91687e-05
ENSMUSG00000028678	Kif2c	-0.59497	0.00975884
ENSMUSG00000020649	Rrm2	-0.594247	0.000879346
ENSMUSG00000001525	Tubb5	-0.59415	0.000283119
ENSMUSG00000029177	Cenpa	-0.593956	5.09714e-06
ENSMUSG00000022142	Nup155	-0.593301	0.000226766
ENSMUSG00000036781	Rps27l	-0.588502	0.00164768
ENSMUSG00000025001	Hells	-0.586938	1.67282e-05
ENSMUSG00000032218	Ccnb2	-0.58585	0.00147788
ENSMUSG00000037710	Cisd1	-0.585593	0.00111977
ENSMUSG00000027957	Slc35a3	-0.583555	4.3416e-06
ENSMUSG00000017550	Atad5	-0.582316	0.00483801
ENSMUSG00000062070	Pgk1	-0.580241	1.02135e-07
ENSMUSG00000020715	Ern1	-0.57558	1.74399e-05
ENSMUSG00000021048	Mthfd1	-0.575194	0.00774146
ENSMUSG00000022385	Gtse1	-0.573674	0.00790758
ENSMUSG00000026434	Nucks1	-0.572791	1.74399e-05
ENSMUSG00000037172	E330009J07Rik	-0.57102	4.71813e-07
ENSMUSG00000036875	Dna2	-0.568735	0.00096737
ENSMUSG00000021597	Slf1	-0.568193	0.00103248
ENSMUSG00000030978	Rrm1	-0.567548	0.000341673
ENSMUSG00000044783	Hjurp	-0.561673	0.00167409
ENSMUSG00000046591	Ticrr	-0.557621	0.00384973
ENSMUSG00000002477	Snrpd1	-0.551288	0.000372153
ENSMUSG00000009207	Lnpk	-0.550197	0.00413362
ENSMUSG00000027203	Dut	-0.550084	1.04119e-05
ENSMUSG00000019982	Myb	-0.54977	0.00075246
ENSMUSG00000023456	Tpi1	-0.549197	1.73398e-05
ENSMUSG00000038943	Prc1	-0.547643	0.00293813
ENSMUSG00000028873	Cdca8	-0.543771	0.00622665
ENSMUSG00000057367	Birc2	-0.543305	1.21941e-05
ENSMUSG00000028212	Ccne2	-0.542918	0.000339795
ENSMUSG00000054717	Hmgb2	-0.542609	0.000111438
ENSMUSG00000024181	Mrpl28	-0.539113	0.0015905
ENSMUSG00000034311	Kif4	-0.538908	0.00952887
ENSMUSG00000039509	Nup133	-0.537253	0.00409923
ENSMUSG00000031403	Dkc1	-0.535677	0.00280935
ENSMUSG00000033904	Ccp110	-0.534956	0.000246941
ENSMUSG00000038679	Trps1	-0.532421	0.000699365
ENSMUSG00000012443	Kif11	-0.531307	0.00197391
ENSMUSG00000036768	Kif15	-0.527236	0.000281074
ENSMUSG00000001707	Eef1e1	-0.524246	0.0058593
ENSMUSG00000022533	Atp13a3	-0.517883	1.16392e-06
ENSMUSG00000051412	Vamp7	-0.517541	0.0038095
ENSMUSG00000005615	Pcyt1a	-0.517457	0.00164768
ENSMUSG00000035164	Zc3h12c	-0.51572	0.000591066
ENSMUSG00000031197	Vbp1	-0.511836	6.13344e-05
ENSMUSG00000026014	Raph1	-0.509687	0.000946538
ENSMUSG00000051329	Nup160	-0.509168	0.00327557
ENSMUSG00000024231	Cul2	-0.507523	0.000385878
ENSMUSG00000043091	Tuba1c	-0.506795	4.80402e-05
ENSMUSG00000004319	Clcn3	-0.503533	7.7673e-05
ENSMUSG00000016409	Nkap	-0.501893	0.00694885
ENSMUSG00000018379	Srsf1	-0.500316	3.29016e-07
ENSMUSG00000025979	Mob4	-0.498935	0.00280935
ENSMUSG00000026121	Sema4c	-0.498888	1.46984e-06
ENSMUSG00000002835	Chaf1a	-0.498327	0.00806145
ENSMUSG00000068329	Htra2	-0.497914	0.00947135
ENSMUSG00000089762	Ier5l	-0.496391	0.00539602
ENSMUSG00000035640	Cbarp	-0.494054	0.00399314
ENSMUSG00000024754	Tmem2	-0.492918	0.000132248
ENSMUSG00000030036	Mogs	-0.492559	0.000218398
ENSMUSG00000026385	Dbi	-0.492205	0.00101841
ENSMUSG00000006678	Pola1	-0.491936	0.00803728
ENSMUSG00000041219	Arhgap11a	-0.490891	0.00459457
ENSMUSG00000020739	Nup85	-0.488919	0.00533196
ENSMUSG00000020277	Pfkl	-0.488644	2.41234e-05
ENSMUSG00000022369	Mtbp	-0.482801	0.00177976
ENSMUSG00000005732	Ranbp1	-0.481261	0.00830408
ENSMUSG00000025997	Ikzf2	-0.480058	0.00112537
ENSMUSG00000070462	Tlnrd1	-0.476437	0.00498996
ENSMUSG00000028455	Stoml2	-0.473078	0.00508109
ENSMUSG00000024795	Kif20b	-0.472462	0.00118447
ENSMUSG00000035024	Ncapd3	-0.470837	0.00588266
ENSMUSG00000061518	Cox5b	-0.46802	0.0011528
ENSMUSG00000022744	Cldnd1	-0.467231	0.00225744
ENSMUSG00000058006	Mdn1	-0.466331	0.00175743
ENSMUSG00000058013	Sept11	-0.466254	0.000303338
ENSMUSG00000028965	Tnfrsf9	-0.464841	6.09738e-05
ENSMUSG00000030869	Ndufab1	-0.4633	0.00975884
ENSMUSG00000049932	H2afx	-0.460649	0.00970138
ENSMUSG00000006262	Mob1b	-0.459714	0.000372153
ENSMUSG00000031232	Magt1	-0.456315	0.000226396
ENSMUSG00000036752	Tubb4b	-0.454777	0.000262817
ENSMUSG00000028676	Srsf10	-0.453873	2.97397e-05
ENSMUSG00000002718	Cse1l	-0.450518	0.00125481
ENSMUSG00000024143	Rhoq	-0.449982	0.000523685
ENSMUSG00000055296	Tmem245	-0.448471	0.00333515
ENSMUSG00000037940	Inpp4b	-0.447678	2.15491e-05
ENSMUSG00000038482	Tfdp1	-0.445274	0.00553877
ENSMUSG00000041891	Lman1	-0.444196	0.000563317
ENSMUSG00000034342	Cbl	-0.444102	0.00440574
ENSMUSG00000024067	Dpy30	-0.441626	0.00555037
ENSMUSG00000014498	Ankrd52	-0.440705	0.000339795
ENSMUSG00000033487	Fndc3a	-0.440465	0.00540293
ENSMUSG00000017386	Traf4	-0.437232	0.00190192
ENSMUSG00000027087	Itgav	-0.436346	4.41813e-05
ENSMUSG00000045767	B230219D22Rik	-0.435458	0.00970138
ENSMUSG00000004099	Dnmt1	-0.433951	0.00803815
ENSMUSG00000039304	Tnfsf10	-0.433679	0.000151957
ENSMUSG00000021131	Erh	-0.431736	0.00109253
ENSMUSG00000018666	Cbx1	-0.431136	0.00191197
ENSMUSG00000029430	Ran	-0.430304	0.00333515
ENSMUSG00000026229	Psmd1	-0.430106	0.00256706
ENSMUSG00000038759	Nup205	-0.426638	0.00307719
ENSMUSG00000034807	Colgalt1	-0.426006	0.00171593
ENSMUSG00000019961	Tmpo	-0.42511	0.000114291
ENSMUSG00000011752	Pgam1	-0.42491	2.62714e-05
ENSMUSG00000028180	Zranb2	-0.42461	0.00242761
ENSMUSG00000036698	Ago2	-0.424341	5.78161e-06
ENSMUSG00000020571	Pdia6	-0.423287	0.000795717
ENSMUSG00000021072	Tmx1	-0.422393	0.00197085
ENSMUSG00000038252	Ncapd2	-0.421463	0.00789591
ENSMUSG00000037474	Dtl	-0.420407	0.00673388
ENSMUSG00000050921	P2ry10	-0.420037	0.00803986
ENSMUSG00000026238	Ptma	-0.419805	1.85985e-05
ENSMUSG00000042719	Naa25	-0.419694	0.00688914
ENSMUSG00000079111	Kdelr2	-0.418971	0.00164704
ENSMUSG00000085208	Brip1os	-0.417291	0.00256706
ENSMUSG00000027601	Mtfr1	-0.417067	0.00981446
ENSMUSG00000037851	Iars	-0.415891	0.00979306
ENSMUSG00000067194	Eif1ax	-0.41241	0.000743871
ENSMUSG00000024742	Fen1	-0.411995	0.00615254
ENSMUSG00000045827	Serpinb9	-0.411635	0.000878578
ENSMUSG00000035898	Uba6	-0.40834	0.00418613
ENSMUSG00000037894	H2afz	-0.404543	0.0014137
ENSMUSG00000075470	Alg10b	-0.404078	0.00751139
ENSMUSG00000021670	Hmgcr	-0.403159	0.000246941
ENSMUSG00000024294	Mib1	-0.398127	0.00154818
ENSMUSG00000025903	Lypla1	-0.397629	0.00559656
ENSMUSG00000021831	Ero1l	-0.396103	0.00243256
ENSMUSG00000026827	Gpd2	-0.395605	0.00050079
ENSMUSG00000041313	Slc7a1	-0.39405	0.00757176
ENSMUSG00000031333	Abcb7	-0.393223	0.00493314
ENSMUSG00000026926	Pmpca	-0.392985	0.0098981
ENSMUSG00000026700	Tnfsf4	-0.392313	4.53354e-05
ENSMUSG00000025823	Pdia4	-0.390525	0.00556362
ENSMUSG00000039703	Nploc4	-0.390234	0.0076481
ENSMUSG00000063406	Tmed5	-0.388113	0.00497909
ENSMUSG00000037679	Inf2	-0.385596	0.00536468
ENSMUSG00000018848	Rars	-0.384274	0.00986924
ENSMUSG00000031555	Adam9	-0.38375	0.00314914
ENSMUSG00000004266	Ptpn6	-0.38194	0.00500898
ENSMUSG00000040751	Lat2	-0.380187	0.00748061
ENSMUSG00000063229	Ldha	-0.378487	0.000937919
ENSMUSG00000031328	Flna	-0.377936	0.000699365
ENSMUSG00000003226	Ranbp2	-0.377299	0.00232914
ENSMUSG00000017929	B4galt5	-0.374849	0.00233389
ENSMUSG00000066551	Hmgb1	-0.373591	0.00215216
ENSMUSG00000030753	Thap12	-0.373404	0.000570677
ENSMUSG00000032423	Syncrip	-0.372954	0.000702831
ENSMUSG00000020048	Hsp90b1	-0.369218	0.00131073
ENSMUSG00000030062	Rpn1	-0.368394	0.00545528
ENSMUSG00000031799	Tpm4	-0.365694	0.00224059
ENSMUSG00000029246	Ppat	-0.365481	0.00915893
ENSMUSG00000026356	Dars	-0.36504	0.00606482
ENSMUSG00000039067	Psmd7	-0.363027	0.0099046
ENSMUSG00000094483	Purb	-0.362266	3.18842e-05
ENSMUSG00000041515	Irf8	-0.358967	0.000224717
ENSMUSG00000060860	Ube2s	-0.35608	0.00971108
ENSMUSG00000021116	Eif2s1	-0.352456	0.00267938
ENSMUSG00000048578	Mlec	-0.351833	0.00161041
ENSMUSG00000029234	Tmem165	-0.351705	0.0044027
ENSMUSG00000023845	Lnpep	-0.349998	0.00798641
ENSMUSG00000060904	Arl1	-0.348099	0.00729955
ENSMUSG00000032265	Fam46a	-0.343124	0.000586858
ENSMUSG00000030257	Srgap3	-0.339952	0.00424407
ENSMUSG00000025534	Gusb	-0.339113	0.00620536
ENSMUSG00000019978	Epb41l2	-0.339015	0.00651646
ENSMUSG00000033629	Hacd3	-0.338387	0.00520525
ENSMUSG00000036943	Rab8b	-0.337755	0.00502614
ENSMUSG00000041459	Tardbp	-0.334905	0.00779933
ENSMUSG00000021427	Ssr1	-0.332413	0.000983269
ENSMUSG00000033184	Tmed7	-0.322578	0.00657247
ENSMUSG00000063524	Eno1	-0.31779	0.00267938
ENSMUSG00000020326	Ccng1	-0.317292	0.00312074
ENSMUSG00000032481	Smarcc1	-0.31575	0.00899848
ENSMUSG00000026914	Psmd14	-0.313682	0.00953627
ENSMUSG00000037933	Bicd2	-0.312757	0.00540293
ENSMUSG00000032050	Rdx	-0.310028	0.00483801
ENSMUSG00000020849	Ywhae	-0.30981	0.00398554
ENSMUSG00000023175	Bsg	-0.309786	0.00312074
ENSMUSG00000046324	Ermp1	-0.308851	0.00552519
ENSMUSG00000071708	Sms	-0.307608	0.00958965
ENSMUSG00000030748	Il4ra	-0.306507	0.00157635
ENSMUSG00000025630	Hprt	-0.306234	0.00525664
ENSMUSG00000020368	Canx	-0.305863	0.00979306
ENSMUSG00000004530	Coro1c	-0.302872	0.0091218
ENSMUSG00000032202	Rab27a	-0.297403	0.00661686
ENSMUSG00000064127	Med14	-0.29681	0.00795752
ENSMUSG00000029836	Cbx3	-0.28349	0.0039703
ENSMUSG00000020738	Sumo2	-0.283406	0.00271902
ENSMUSG00000026064	Ptp4a1	-0.283087	0.00741606
ENSMUSG00000029135	Fosl2	-0.274838	0.00327557
ENSMUSG00000000420	Galnt1	-0.261089	0.00767473
ENSMUSG00000025162	Csnk1d	0.256977	0.00709566
ENSMUSG00000074886	Grk6	0.259796	0.00615254
ENSMUSG00000025220	Mgea5	0.261294	0.00515975
ENSMUSG00000030742	Lat	0.272734	0.00690279
ENSMUSG00000033220	Rac2	0.279119	0.00627426
ENSMUSG00000098112	Bin2	0.280901	0.00858453
ENSMUSG00000018899	Irf1	0.284181	0.00531839
ENSMUSG00000030830	Itgal	0.291565	0.00302416
ENSMUSG00000039936	Pik3cd	0.293824	0.00104621
ENSMUSG00000002147	Stat6	0.295671	0.00418898
ENSMUSG00000034908	Sidt2	0.295693	0.00242308
ENSMUSG00000020719	Ddx5	0.299964	0.00627426
ENSMUSG00000015755	Tab2	0.302072	0.00915893
ENSMUSG00000057948	Unc13d	0.30326	0.00459457
ENSMUSG00000024381	Bin1	0.304196	0.00762491
ENSMUSG00000069094	Pde7a	0.309177	0.00924126
ENSMUSG00000030213	Atf7ip	0.309215	0.00641665
ENSMUSG00000041417	Pik3r1	0.310027	0.00502569
ENSMUSG00000026034	Clk1	0.310967	0.00555037
ENSMUSG00000020272	Stk10	0.311308	0.00243256
ENSMUSG00000027863	Cd2	0.314379	0.00948744
ENSMUSG00000025223	Ldb1	0.31521	0.00116473
ENSMUSG00000037946	Fgd3	0.315454	0.00841515
ENSMUSG00000029458	Brap	0.316247	0.00821496
ENSMUSG00000070034	Sp110	0.318863	0.00745458
ENSMUSG00000028581	Laptm5	0.321694	0.000976623
ENSMUSG00000024248	Cox7a2l	0.322248	0.00497909
ENSMUSG00000031154	Otud5	0.323678	0.00165185
ENSMUSG00000027936	Crtc2	0.324111	0.00877236
ENSMUSG00000018008	Cyth4	0.325664	0.000289433
ENSMUSG00000021819	Zswim8	0.326097	0.00305512
ENSMUSG00000033326	Kdm4a	0.329364	0.00993495
ENSMUSG00000071552	Tigit	0.329659	0.00620536
ENSMUSG00000021374	Nup153	0.329692	0.00845547
ENSMUSG00000040479	Dgkz	0.33102	7.62449e-05
ENSMUSG00000010095	Slc3a2	0.332027	0.00369051
ENSMUSG00000022214	Dcaf11	0.334539	0.00497909
ENSMUSG00000026626	Ppp2r5a	0.335396	0.00340987
ENSMUSG00000000486	37135	0.335842	0.000777338
ENSMUSG00000055817	Mta3	0.336121	0.00591723
ENSMUSG00000030122	Ptms	0.336199	0.00792861
ENSMUSG00000063268	Parp10	0.33673	0.00497909
ENSMUSG00000028245	Nsmaf	0.337775	0.0052015
ENSMUSG00000001248	Gramd1a	0.339862	0.00434192
ENSMUSG00000046897	Zfp740	0.33992	0.00283798
ENSMUSG00000029860	Zyx	0.33994	0.00168481
ENSMUSG00000032870	Smap2	0.34049	0.00132199
ENSMUSG00000029528	Pxn	0.34301	0.00167922
ENSMUSG00000062939	Stat4	0.343128	0.00810636
ENSMUSG00000066151	Fkbp15	0.344088	0.00918756
ENSMUSG00000028675	Pnrc2	0.346452	0.00903663
ENSMUSG00000053470	Kdm3a	0.347137	0.00195205
ENSMUSG00000006169	Clint1	0.347605	0.00497909
ENSMUSG00000024696	Lpxn	0.349121	0.000454492
ENSMUSG00000034595	Ppp1r18	0.349191	0.000312316
ENSMUSG00000027951	Adar	0.350108	0.00255812
ENSMUSG00000024855	Pacs1	0.351741	0.00803239
ENSMUSG00000023048	Prr13	0.352305	0.00615254
ENSMUSG00000037465	Klf10	0.352831	0.00114866
ENSMUSG00000002699	Lcp2	0.35324	0.00512578
ENSMUSG00000039205	Ciz1	0.353283	0.00797479
ENSMUSG00000031207	Msn	0.355014	0.000192644
ENSMUSG00000006705	Pknox1	0.355784	0.00725876
ENSMUSG00000061689	Dlgap4	0.356905	0.00901892
ENSMUSG00000038866	Zcchc2	0.35799	0.00115229
ENSMUSG00000043263	Ifi209	0.358398	0.0098393
ENSMUSG00000064262	Gimap8	0.359222	0.00245612
ENSMUSG00000050379	38961	0.35926	0.000531342
ENSMUSG00000076498	Trbc2	0.359332	0.00970138
ENSMUSG00000031833	Mast3	0.360295	0.000489135
ENSMUSG00000050621	Rps27rt	0.360694	0.00673388
ENSMUSG00000029050	Ski	0.36346	0.00271451
ENSMUSG00000030671	Pde3b	0.36531	0.00533196
ENSMUSG00000002897	Il17ra	0.367555	0.00422902
ENSMUSG00000050106	Tmc8	0.367791	0.00817342
ENSMUSG00000026094	Stk17b	0.369941	0.000188744
ENSMUSG00000040940	Arhgef1	0.372978	1.5041e-06
ENSMUSG00000039621	Prex1	0.375333	0.000181469
ENSMUSG00000025034	Trim8	0.379056	0.00815481
ENSMUSG00000040363	Bcor	0.380516	0.00999286
ENSMUSG00000026009	Icos	0.381345	0.0081699
ENSMUSG00000045382	Cxcr4	0.381666	0.00173895
ENSMUSG00000028821	Syf2	0.385159	0.000963929
ENSMUSG00000003271	Sult2b1	0.385457	0.00709566
ENSMUSG00000040128	Pnrc1	0.388913	0.00103773
ENSMUSG00000034042	Gpbp1l1	0.389826	0.000482684
ENSMUSG00000022999	Lmbr1l	0.390257	0.00249777
ENSMUSG00000023170	Gps2	0.391311	0.0044027
ENSMUSG00000021458	2010111I01Rik	0.391846	0.00554837
ENSMUSG00000026655	Fam107b	0.391918	4.37598e-05
ENSMUSG00000039747	Orai2	0.391939	0.00588552
ENSMUSG00000019505	Ubb	0.394476	0.00280935
ENSMUSG00000052142	Rasal3	0.395456	2.16978e-05
ENSMUSG00000034168	Irf2bpl	0.395844	0.00620536
ENSMUSG00000062822	4833420G17Rik	0.396784	0.00535752
ENSMUSG00000038976	Ppp1r9b	0.398425	0.000336983
ENSMUSG00000037235	Mxd4	0.400985	0.000919705
ENSMUSG00000050592	Fam78a	0.401663	0.00243256
ENSMUSG00000030616	Sytl2	0.40224	0.00575617
ENSMUSG00000026786	Apbb1ip	0.404942	0.0013643
ENSMUSG00000049922	Slc35c1	0.405598	0.0015748
ENSMUSG00000034786	Gpsm3	0.407214	0.00288143
ENSMUSG00000033545	Znrf1	0.408776	0.00129604
ENSMUSG00000037318	Traf3ip3	0.409644	0.000264952
ENSMUSG00000038876	Rnf146	0.410293	0.00208938
ENSMUSG00000045374	Wdr81	0.411142	0.00915893
ENSMUSG00000002885	Adgre5	0.411185	1.85985e-05
ENSMUSG00000059810	Rgs3	0.413445	0.000345666
ENSMUSG00000042613	Pbxip1	0.413698	0.00946028
ENSMUSG00000020101	Vsir	0.413934	0.00520316
ENSMUSG00000006127	Inpp5k	0.416685	0.00165657
ENSMUSG00000063382	Bcl9l	0.418197	0.00921586
ENSMUSG00000035007	Rundc1	0.418402	0.00803728
ENSMUSG00000027942	4933434E20Rik	0.420364	0.0015005
ENSMUSG00000026222	Sp100	0.421631	1.18918e-06
ENSMUSG00000029385	Ccng2	0.422514	0.00115877
ENSMUSG00000024560	Cxxc1	0.422542	0.000482684
ENSMUSG00000040699	Limd2	0.422769	0.0001655
ENSMUSG00000032127	Vps11	0.423337	0.00511844
ENSMUSG00000015837	Sqstm1	0.4257	0.00525664
ENSMUSG00000053907	Mat2a	0.425912	2.52463e-05
ENSMUSG00000004837	Grap	0.426541	0.000891059
ENSMUSG00000024856	Cdk2ap2	0.427245	0.00809034
ENSMUSG00000018001	Cyth3	0.427361	0.000489135
ENSMUSG00000040584	Abcb1a	0.429101	0.00125481
ENSMUSG00000056962	Jmjd6	0.429963	0.00120694
ENSMUSG00000042406	Atf4	0.43037	0.00531839
ENSMUSG00000047507	Baiap3	0.432824	0.000372153
ENSMUSG00000027514	Zbp1	0.435469	0.00648612
ENSMUSG00000042385	Gzmk	0.435528	0.00185627
ENSMUSG00000037523	Mavs	0.435904	0.00588266
ENSMUSG00000048249	Crebrf	0.436346	0.00511728
ENSMUSG00000100150	Gm19585	0.438551	0.00161099
ENSMUSG00000048546	Tob2	0.439418	0.00443412
ENSMUSG00000075327	Zbtb2	0.439589	0.00111895
ENSMUSG00000032596	Uba7	0.439897	0.00269225
ENSMUSG00000032285	Dnaja4	0.442619	0.00284442
ENSMUSG00000063646	Jakmip1	0.443305	0.00289188
ENSMUSG00000033016	Nfatc1	0.448074	5.87926e-05
ENSMUSG00000092417	Gpank1	0.448687	0.00938472
ENSMUSG00000070808	Bicra	0.449109	0.00999286
ENSMUSG00000032446	Eomes	0.449313	0.0001655
ENSMUSG00000066258	Trim12a	0.450952	0.00612067
ENSMUSG00000045817	Zfp36l2	0.452872	0.00556781
ENSMUSG00000028525	Pde4b	0.456132	0.000426436
ENSMUSG00000044786	Zfp36	0.456303	4.41813e-05
ENSMUSG00000002395	Use1	0.457445	0.00129887
ENSMUSG00000057058	Skap1	0.457617	0.00011525
ENSMUSG00000038806	Sde2	0.460269	0.00689523
ENSMUSG00000044456	Rin3	0.462581	0.000111431
ENSMUSG00000028893	Sesn2	0.463158	0.00390414
ENSMUSG00000030798	Cd37	0.463301	5.87926e-05
ENSMUSG00000054676	1600014C10Rik	0.463778	0.00361994
ENSMUSG00000060261	Gtf2i	0.464165	2.00587e-07
ENSMUSG00000029513	Prkab1	0.464413	0.0081699
ENSMUSG00000039294	BC017643	0.464574	1.21941e-05
ENSMUSG00000002325	Irf9	0.465478	1.48188e-05
ENSMUSG00000039686	Zer1	0.465494	0.000814492
ENSMUSG00000026269	Rnpepl1	0.466503	0.000747225
ENSMUSG00000052760	A630001G21Rik	0.468003	0.00792861
ENSMUSG00000019843	Fyn	0.469381	4.13517e-08
ENSMUSG00000025647	Shisa5	0.470281	7.83401e-05
ENSMUSG00000042903	Foxo4	0.470368	0.00471158
ENSMUSG00000041560	Nop53	0.470588	1.85985e-05
ENSMUSG00000001700	Gramd3	0.471067	0.000769772
ENSMUSG00000037573	Tob1	0.472569	0.000939037
ENSMUSG00000029401	Rilpl2	0.474743	0.002
ENSMUSG00000022102	Dok2	0.476285	0.00133079
ENSMUSG00000026519	Tmem63a	0.478871	0.00318417
ENSMUSG00000038612	Mcl1	0.480324	2.15491e-05
ENSMUSG00000085795	Zfp703	0.481543	0.00248781
ENSMUSG00000037552	Plekhg2	0.485502	5.87926e-05
ENSMUSG00000025212	Sfxn3	0.485855	0.00838266
ENSMUSG00000044340	Phlpp1	0.486342	0.00902204
ENSMUSG00000018572	Phf23	0.487143	2.1561e-05
ENSMUSG00000025880	Smad7	0.488875	4.77967e-05
ENSMUSG00000029681	Bcl7b	0.493787	0.00790758
ENSMUSG00000021262	Evl	0.498177	0.00507064
ENSMUSG00000026430	Rassf5	0.499566	2.44124e-06
ENSMUSG00000039159	Ube2h	0.499897	0.000214225
ENSMUSG00000032519	Slc25a38	0.505658	0.00223597
ENSMUSG00000069892	9930111J21Rik2	0.506065	0.00217934
ENSMUSG00000064065	Ipcef1	0.509906	1.31242e-05
ENSMUSG00000048878	Hexim1	0.510956	0.000453819
ENSMUSG00000039089	L3mbtl3	0.511658	0.00746257
ENSMUSG00000037926	Ssh2	0.51353	0.000158145
ENSMUSG00000034403	Pja1	0.515981	0.000192644
ENSMUSG00000045098	Kmt5b	0.517074	7.34937e-06
ENSMUSG00000035697	Arhgap45	0.517763	1.75641e-07
ENSMUSG00000024014	Pim1	0.517781	0.00346736
ENSMUSG00000036944	Tmem71	0.520098	0.00131439
ENSMUSG00000031812	Map1lc3b	0.522647	2.8428e-05
ENSMUSG00000000441	Raf1	0.522764	7.62449e-05
ENSMUSG00000023991	Foxp4	0.525539	0.00125481
ENSMUSG00000014470	Rnf166	0.526514	8.84293e-05
ENSMUSG00000028906	Epb41	0.527102	7.34937e-06
ENSMUSG00000026113	Inpp4a	0.533634	0.00506639
ENSMUSG00000062007	Hsh2d	0.536284	0.00741606
ENSMUSG00000021895	Arhgef3	0.537921	1.85985e-05
ENSMUSG00000051124	Gimap9	0.53839	0.00553967
ENSMUSG00000036432	Siah2	0.540776	0.000341673
ENSMUSG00000074071	Fam169b	0.541711	2.88678e-05
ENSMUSG00000004568	Arhgef18	0.542591	0.000818469
ENSMUSG00000031532	Saraf	0.542878	1.68913e-06
ENSMUSG00000058979	Hdhd5	0.544063	0.00014239
ENSMUSG00000035678	Tnfsf9	0.545393	0.0097876
ENSMUSG00000031101	Sash3	0.549962	5.61388e-09
ENSMUSG00000040435	Ppp1r15a	0.550316	0.00168481
ENSMUSG00000024193	Phf1	0.55037	0.000613989
ENSMUSG00000022900	Ildr1	0.550601	0.00552519
ENSMUSG00000025572	Tmc6	0.551354	1.85985e-05
ENSMUSG00000036478	Btg1	0.552168	5.1223e-07
ENSMUSG00000041187	Prkd2	0.552799	0.000123778
ENSMUSG00000056749	Nfil3	0.553541	6.90511e-05
ENSMUSG00000026796	Fam129b	0.555751	0.00404166
ENSMUSG00000078429	Ctdsp2	0.564163	1.74399e-05
ENSMUSG00000018819	Lsp1	0.564767	6.24844e-06
ENSMUSG00000038151	Prdm1	0.567843	0.00284442
ENSMUSG00000003154	Foxj2	0.568448	0.000368326
ENSMUSG00000024462	Gabbr1	0.569599	0.00538441
ENSMUSG00000036931	Nfkbid	0.569808	0.00273577
ENSMUSG00000026011	Ctla4	0.569855	0.00121183
ENSMUSG00000035757	Selenoo	0.570062	0.00680347
ENSMUSG00000004707	Ly9	0.570196	0.00346163
ENSMUSG00000030064	Frmd4b	0.570227	0.00511844
ENSMUSG00000032840	2410131K14Rik	0.571353	0.00290521
ENSMUSG00000064109	Hcst	0.571466	0.00348769
ENSMUSG00000029060	Mib2	0.573907	0.00734152
ENSMUSG00000044199	S1pr4	0.573929	4.6762e-05
ENSMUSG00000031539	Ap3m2	0.574371	0.00439949
ENSMUSG00000030161	Gabarapl1	0.574847	0.000489135
ENSMUSG00000035824	Tk2	0.575399	0.00275962
ENSMUSG00000019970	Sgk1	0.576641	0.00552519
ENSMUSG00000030852	Tacc2	0.576773	0.000907447
ENSMUSG00000028793	Rnf19b	0.577003	0.000262087
ENSMUSG00000050555	Hyls1	0.577131	0.00556362
ENSMUSG00000030741	Spns1	0.57719	3.94883e-05
ENSMUSG00000047777	Phf13	0.577238	0.000112274
ENSMUSG00000047407	Tgif1	0.578751	1.55691e-07
ENSMUSG00000024975	Pdcd4	0.581963	2.95634e-09
ENSMUSG00000037849	Ifi206	0.582851	8.10589e-05
ENSMUSG00000040746	Rnf167	0.583167	8.86689e-05
ENSMUSG00000026778	Prkcq	0.586361	1.04273e-06
ENSMUSG00000046679	C87436	0.589145	0.00798641
ENSMUSG00000000078	Klf6	0.590286	0.00011525
ENSMUSG00000022508	Bcl6	0.590711	0.00161041
ENSMUSG00000008384	Sertad1	0.591038	0.00120694
ENSMUSG00000025408	Ddit3	0.591469	0.00246312
ENSMUSG00000027639	Samhd1	0.593786	4.36105e-05
ENSMUSG00000035944	Ttc38	0.5939	0.00688914
ENSMUSG00000050212	Eva1b	0.598279	0.00952887
ENSMUSG00000002668	Dennd1c	0.598471	3.45677e-06
ENSMUSG00000078763	Slfn1	0.6004	0.000218143
ENSMUSG00000042675	Ypel3	0.603715	4.88713e-05
ENSMUSG00000040957	Cables1	0.604843	0.00103236
ENSMUSG00000038963	Slco4a1	0.6052	0.00803986
ENSMUSG00000002625	Akap8l	0.609209	0.000486712
ENSMUSG00000086652	Gm14029	0.611198	0.00120694
ENSMUSG00000022014	Epsti1	0.614062	2.63586e-06
ENSMUSG00000032661	Oas3	0.614547	0.00132199
ENSMUSG00000049866	Arl4c	0.616259	1.85964e-05
ENSMUSG00000027452	Acss1	0.616516	0.000125549
ENSMUSG00000028756	Pink1	0.618961	0.00943739
ENSMUSG00000030720	Cln3	0.619775	0.000937919
ENSMUSG00000048756	Foxo3	0.621753	0.00999286
ENSMUSG00000039382	Wdr45	0.622683	0.00216416
ENSMUSG00000030157	Clec2d	0.623488	0.000209743
ENSMUSG00000022377	Asap1	0.623566	0.000574766
ENSMUSG00000000386	Mx1	0.624132	0.000907447
ENSMUSG00000050600	Zfp831	0.626728	0.00643426
ENSMUSG00000041773	Enc1	0.629004	0.00327557
ENSMUSG00000020589	Fam49a	0.63262	0.000263473
ENSMUSG00000038524	Fchsd1	0.636017	0.000356467
ENSMUSG00000061577	Adgrg5	0.638178	0.000289433
ENSMUSG00000029605	Oas1b	0.640513	0.00275427
ENSMUSG00000041000	Trim62	0.642143	0.00367106
ENSMUSG00000057219	Armc7	0.645311	8.55582e-06
ENSMUSG00000025402	Nab2	0.64783	9.94787e-09
ENSMUSG00000043505	Gimap5	0.648082	3.55713e-05
ENSMUSG00000040570	Rundc3b	0.648715	0.00409923
ENSMUSG00000039485	Tspyl4	0.649102	0.00103732
ENSMUSG00000068735	Trp53i11	0.652007	0.000308115
ENSMUSG00000024399	Ltb	0.655822	0.000341673
ENSMUSG00000056735	A930024E05Rik	0.656204	0.00818431
ENSMUSG00000030047	Arhgap25	0.656725	7.05331e-07
ENSMUSG00000072620	Slfn2	0.661013	2.71103e-06
ENSMUSG00000022952	Runx1	0.661986	0.00924698
ENSMUSG00000020520	Galnt10	0.662121	0.00307209
ENSMUSG00000027368	Dusp2	0.663347	1.31762e-12
ENSMUSG00000038058	Nod1	0.663844	1.45523e-05
ENSMUSG00000039910	Cited2	0.664955	0.000612624
ENSMUSG00000025237	Parp6	0.665822	0.000592497
ENSMUSG00000052684	Jun	0.666827	0.000366358
ENSMUSG00000031155	Pim2	0.669825	7.07746e-06
ENSMUSG00000022946	Dopey2	0.680551	5.66483e-05
ENSMUSG00000044768	D1Ertd622e	0.682693	0.00874044
ENSMUSG00000046447	Camk2n1	0.685736	0.00792861
ENSMUSG00000023243	Kcnk5	0.688608	0.00185022
ENSMUSG00000090019	Gimap1	0.689391	1.31141e-05
ENSMUSG00000041263	Rusc1	0.691334	3.88893e-05
ENSMUSG00000074785	Plxnc1	0.693787	0.000402519
ENSMUSG00000071724	Smpd5	0.697585	0.00286645
ENSMUSG00000033313	Fbxl8	0.698313	0.00372197
ENSMUSG00000044258	Ctla2a	0.698531	0.000372153
ENSMUSG00000001741	Il16	0.699784	3.29729e-07
ENSMUSG00000051998	Lax1	0.700304	1.37928e-10
ENSMUSG00000008348	Ubc	0.705495	1.14779e-06
ENSMUSG00000020638	Cmpk2	0.706259	0.00269225
ENSMUSG00000039810	Zc3h10	0.709433	0.000132959
ENSMUSG00000024401	Tnf	0.711109	0.00244828
ENSMUSG00000032281	Acsbg1	0.711863	3.33624e-06
ENSMUSG00000020205	Phlda1	0.71327	2.8428e-05
ENSMUSG00000066677	Ifi208	0.717314	4.36105e-05
ENSMUSG00000021270	Hsp90aa1	0.719196	9.37045e-06
ENSMUSG00000031129	Slc9a9	0.72038	0.000150021
ENSMUSG00000046808	Atp10d	0.72671	9.32332e-05
ENSMUSG00000039264	Gimap3	0.72884	4.89151e-08
ENSMUSG00000059013	Sh2d3c	0.730666	6.10085e-09
ENSMUSG00000074896	Ifit3	0.734022	0.00102747
ENSMUSG00000084826	AI847159	0.743089	0.00503641
ENSMUSG00000098178	Gm42418	0.746858	1.15681e-05
ENSMUSG00000041607	Mbp	0.747488	5.46922e-07
ENSMUSG00000047867	Gimap6	0.751103	6.10085e-09
ENSMUSG00000041264	Uspl1	0.756223	2.99604e-09
ENSMUSG00000066621	Tecpr1	0.756882	1.63163e-07
ENSMUSG00000037266	Rsrp1	0.757824	1.75559e-09
ENSMUSG00000029726	Mepce	0.757901	7.78822e-07
ENSMUSG00000048852	Gm12185	0.758963	0.00228183
ENSMUSG00000041609	Bicdl1	0.763472	0.00294228
ENSMUSG00000015619	Gata3	0.7688	4.4681e-07
ENSMUSG00000020901	Pik3r5	0.772079	5.50448e-11
ENSMUSG00000038578	Susd1	0.77819	0.000240183
ENSMUSG00000028410	Dnaja1	0.779522	4.15847e-08
ENSMUSG00000013707	Tnfaip8l2	0.780477	1.39476e-05
ENSMUSG00000024030	Abcg1	0.781336	9.47266e-07
ENSMUSG00000029657	Hsph1	0.78975	2.02655e-08
ENSMUSG00000040270	Bach2	0.791343	0.00913266
ENSMUSG00000053581	Zfand2a	0.793191	0.000209743
ENSMUSG00000021356	Irf4	0.795881	2.41163e-06
ENSMUSG00000020689	Itgb3	0.795926	0.000950633
ENSMUSG00000002996	Hbp1	0.797513	6.19134e-09
ENSMUSG00000027605	Acss2	0.80601	0.00497909
ENSMUSG00000042207	Kdm5b	0.811088	0.00107311
ENSMUSG00000023927	Satb1	0.811192	2.15744e-07
ENSMUSG00000001281	Itgb7	0.811401	1.98178e-06
ENSMUSG00000018425	Dhx40	0.811753	1.55691e-07
ENSMUSG00000047604	Frat2	0.812136	0.00434821
ENSMUSG00000018733	Pex12	0.813805	0.00389163
ENSMUSG00000097779	4833407H14Rik	0.822342	0.00792861
ENSMUSG00000025357	Dgka	0.822792	1.84814e-15
ENSMUSG00000022602	Arc	0.824833	0.000507415
ENSMUSG00000038418	Egr1	0.830088	4.00861e-07
ENSMUSG00000022358	Fbxo32	0.830269	2.4757e-10
ENSMUSG00000029658	Wdr95	0.83194	4.40247e-05
ENSMUSG00000024027	Glp1r	0.837138	2.44124e-06
ENSMUSG00000037526	Atg14	0.838961	0.00273577
ENSMUSG00000052302	Tbc1d30	0.839947	0.00966809
ENSMUSG00000009739	Pou6f1	0.842323	5.94734e-06
ENSMUSG00000032657	Fam189b	0.847596	1.23274e-05
ENSMUSG00000021127	Zfp36l1	0.851609	6.69411e-08
ENSMUSG00000099881	2810013P06Rik	0.8605	0.00920718
ENSMUSG00000064337	mt-Rnr1	0.862607	4.38005e-07
ENSMUSG00000031431	Tsc22d3	0.86298	1.44857e-09
ENSMUSG00000030878	Cdr2	0.87585	2.02875e-06
ENSMUSG00000034586	Hid1	0.879153	2.7307e-06
ENSMUSG00000003882	Il7r	0.880794	0.000643339
ENSMUSG00000038893	Fam117a	0.881067	1.11827e-06
ENSMUSG00000038304	Cd160	0.885588	2.95462e-08
ENSMUSG00000030847	Bag3	0.889439	1.36964e-05
ENSMUSG00000044250	Pced1b	0.891705	5.25304e-12
ENSMUSG00000097636	Mirt1	0.899063	0.00525664
ENSMUSG00000027456	Sdcbp2	0.899581	0.000189266
ENSMUSG00000000142	Axin2	0.902936	0.00216416
ENSMUSG00000066640	Fbxl18	0.908442	1.74399e-05
ENSMUSG00000034881	Tbxa2r	0.910447	2.96262e-05
ENSMUSG00000038175	Mylip	0.912675	1.44857e-09
ENSMUSG00000085741	5430405H02Rik	0.920901	0.00813339
ENSMUSG00000032648	Pygm	0.924239	0.00280935
ENSMUSG00000032946	Rasgrp2	0.928463	3.50852e-08
ENSMUSG00000015476	Prrt1	0.932941	0.0014048
ENSMUSG00000064339	mt-Rnr2	0.935166	1.32246e-09
ENSMUSG00000025163	Cd7	0.949564	0.000132959
ENSMUSG00000036452	Arhgap26	0.950534	3.13573e-06
ENSMUSG00000040451	Sgms1	0.987692	0.00133314
ENSMUSG00000033083	Tbc1d4	0.991251	7.34456e-07
ENSMUSG00000049103	Ccr2	1.01404	9.24039e-14
ENSMUSG00000035042	Ccl5	1.02189	0.00208938
ENSMUSG00000025491	Ifitm1	1.02461	0.00636327
ENSMUSG00000005483	Dnajb1	1.02547	8.36735e-11
ENSMUSG00000030110	Ret	1.04499	4.8691e-07
ENSMUSG00000020482	Ccdc117	1.05361	2.83592e-09
ENSMUSG00000023009	Nckap5l	1.05692	0.00063685
ENSMUSG00000027985	Lef1	1.05729	8.90067e-06
ENSMUSG00000033368	Trim69	1.08796	0.00668511
ENSMUSG00000020732	Rab37	1.09086	0.000163123
ENSMUSG00000033730	Egr3	1.10237	0.00998271
ENSMUSG00000021678	F2rl1	1.12087	0.00260102
ENSMUSG00000015314	Slamf6	1.1234	2.15744e-07
ENSMUSG00000059772	Slx1b	1.12563	1.87805e-06
ENSMUSG00000074063	Osgin1	1.13216	3.61595e-12
ENSMUSG00000020183	Cpm	1.13485	0.000262817
ENSMUSG00000022176	Rem2	1.14108	0.00120694
ENSMUSG00000041842	Fhdc1	1.14432	0.00725876
ENSMUSG00000038393	Txnip	1.15368	1.84814e-15
ENSMUSG00000020297	Nsg2	1.15782	0.00161099
ENSMUSG00000020034	Tcp11l2	1.16386	6.0755e-10
ENSMUSG00000035202	Lars2	1.16757	1.19432e-14
ENSMUSG00000031453	Rasa3	1.16788	2.2537e-17
ENSMUSG00000029627	Zkscan14	1.17296	1.55691e-07
ENSMUSG00000054499	Dedd2	1.17504	4.79022e-12
ENSMUSG00000049608	Gpr55	1.19308	0.00179026
ENSMUSG00000055148	Klf2	1.21445	2.6771e-05
ENSMUSG00000026205	Slc23a3	1.23486	0.0029054
ENSMUSG00000030156	Cd69	1.23834	0.00818431
ENSMUSG00000036006	Ripor2	1.24211	8.9257e-21
ENSMUSG00000037868	Egr2	1.25027	1.12564e-06
ENSMUSG00000024524	Gnal	1.2564	0.00404941
ENSMUSG00000030219	Erp27	1.27296	0.00979306
ENSMUSG00000029603	Dtx1	1.28956	0.00953627
ENSMUSG00000038550	Ciart	1.31674	0.00621945
ENSMUSG00000045092	S1pr1	1.36183	0.000449883
ENSMUSG00000090958	Lrrc32	1.37141	0.00129604
ENSMUSG00000018925	Heatr9	1.39924	0.00280935
ENSMUSG00000034762	Glis1	1.40051	0.0057511
ENSMUSG00000039908	Slc26a11	1.40283	0.001107
ENSMUSG00000044465	Fam160a2	1.40477	1.75641e-07
ENSMUSG00000071347	C1qtnf9	1.43692	0.00921586
ENSMUSG00000000782	Tcf7	1.44681	0.000925156
ENSMUSG00000026581	Sell	1.49658	2.44124e-06
ENSMUSG00000058620	Adra2b	1.5253	0.000464081
ENSMUSG00000033450	Tagap	1.53334	0.000113238
ENSMUSG00000030653	Gm45837	1.57803	1.80633e-05
ENSMUSG00000041849	Card6	1.62501	1.18374e-12
ENSMUSG00000033316	Galnt9	1.62617	0.000372153
ENSMUSG00000086075	Gm15728	1.70583	0.00422902
ENSMUSG00000039521	Foxp3	1.71968	1.04552e-09
ENSMUSG00000002324	Rec8	1.80076	0.000752174
ENSMUSG00000016529	Il10	1.85089	0.000508449
ENSMUSG00000034936	Arl4d	1.8538	0.000160981
ENSMUSG00000050232	Cxcr3	1.88895	4.61353e-17
ENSMUSG00000027313	Chac1	2.33652	0.000177343
ENSMUSG00000090877	Hspa1b	2.75203	5.46922e-07
ENSMUSG00000091971	Hspa1a	2.75588	7.54691e-07
ENSMUSG00000097971	Gm26917	2.88878	2.95462e-08
ENSMUSG00000065037	Rn7sk	3.33687	1.37894e-43

## Sheet: hematopoietic cells
Table S1B: Differentially expressed genes within Hematopoietic cells
ensembl ID	gene symbol	log2-fold change	Adjusted p-value
		(Irr vs Non-Irr)
ENSMUSG00000047517	Dmbt1	-6.34465	0.000103631
ENSMUSG00000096278	Dcpp2	-5.91229	0.00349088
ENSMUSG00000047730	Fcgbp	-5.74188	0.00216643
ENSMUSG00000067543	Prb1	-5.59188	0.00367849
ENSMUSG00000076514	Igkv17-121	-5.56074	0.000522919
ENSMUSG00000076523	Igkv15-103	-5.51238	0.00114721
ENSMUSG00000033831	Fgb	-4.53583	0.000185259
ENSMUSG00000020911	Krt19	-4.48076	2.92046e-08
ENSMUSG00000059149	Mfsd4a	-4.26214	1.65368e-13
ENSMUSG00000047230	Cldn2	-3.83343	9.94354e-07
ENSMUSG00000031551	Ido1	-3.57318	1.8601e-08
ENSMUSG00000028972	Car6	-3.48466	5.25038e-06
ENSMUSG00000038600	Atp6v0a4	-3.42029	0.000154048
ENSMUSG00000050296	Abca12	-3.09489	2.04729e-05
ENSMUSG00000028626	Col9a2	-3.05544	4.46618e-10
ENSMUSG00000006269	Atp6v1b1	-2.88623	1.44101e-10
ENSMUSG00000050808	Muc15	-2.69454	0.000517339
ENSMUSG00000067276	Capn6	-2.57516	0.00305071
ENSMUSG00000032373	Car12	-2.48228	8.47887e-16
ENSMUSG00000042498	D330045A20Rik	-2.11656	0.000181515
ENSMUSG00000029282	Amtn	-2.10705	1.72099e-05
ENSMUSG00000022949	Clic6	-1.98497	0.000467972
ENSMUSG00000053846	Lipg	-1.96822	0.000163833
ENSMUSG00000047861	Foxi1	-1.88684	0.000852929
ENSMUSG00000030849	Fgfr2	-1.88577	0.000559652
ENSMUSG00000026605	Cenpf	-1.87984	7.66524e-11
ENSMUSG00000031636	Pdlim3	-1.87538	0.000176854
ENSMUSG00000020826	Nos2	-1.74644	1.52395e-12
ENSMUSG00000013584	Aldh1a2	-1.70408	0.00407784
ENSMUSG00000016942	Tmprss6	-1.68459	0.000580014
ENSMUSG00000000031	H19	-1.68047	2.06583e-05
ENSMUSG00000041498	Kif14	-1.63785	4.74616e-06
ENSMUSG00000072980	Oip5	-1.63389	0.00579404
ENSMUSG00000035683	Melk	-1.62637	2.94794e-07
ENSMUSG00000027326	Knl1	-1.58946	1.00226e-08
ENSMUSG00000026779	Mastl	-1.57162	7.2239e-05
ENSMUSG00000022322	Shcbp1	-1.56687	1.88349e-07
ENSMUSG00000044201	Cdc25c	-1.53345	0.00570984
ENSMUSG00000039396	Neil3	-1.53155	9.12396e-07
ENSMUSG00000020330	Hmmr	-1.52617	1.88996e-06
ENSMUSG00000028678	Kif2c	-1.52213	3.29701e-09
ENSMUSG00000024989	Cep55	-1.49832	2.16377e-09
ENSMUSG00000020566	Atp6v1c2	-1.47675	0.000886637
ENSMUSG00000034023	Fancd2	-1.47429	8.60117e-07
ENSMUSG00000020493	Prr11	-1.45902	4.92665e-06
ENSMUSG00000026622	Nek2	-1.45765	1.47443e-08
ENSMUSG00000041431	Ccnb1	-1.44023	9.58023e-05
ENSMUSG00000001403	Ube2c	-1.41923	1.59693e-07
ENSMUSG00000033952	Aspm	-1.41359	4.96212e-09
ENSMUSG00000027379	Bub1	-1.39098	2.9617e-06
ENSMUSG00000027715	Ccna2	-1.38936	2.77651e-10
ENSMUSG00000038738	Shank1	-1.36794	0.000580014
ENSMUSG00000026039	Sgo2a	-1.3639	9.48007e-05
ENSMUSG00000022034	Esco2	-1.35775	0.00125663
ENSMUSG00000048031	Fcrl5	-1.35354	1.88179e-07
ENSMUSG00000045328	Cenpe	-1.35128	2.49978e-08
ENSMUSG00000034311	Kif4	-1.33337	6.87039e-08
ENSMUSG00000027966	Col11a1	-1.33306	0.00610175
ENSMUSG00000029414	Kntc1	-1.32963	5.06176e-08
ENSMUSG00000042671	Rgs8	-1.30919	0.000394085
ENSMUSG00000012443	Kif11	-1.30529	2.51379e-12
ENSMUSG00000027323	Rad51	-1.30369	7.36948e-07
ENSMUSG00000002055	Spag5	-1.29146	1.51604e-09
ENSMUSG00000026683	Nuf2	-1.28417	0.000105399
ENSMUSG00000028175	Depdc1a	-1.27063	0.00424644
ENSMUSG00000051378	Kif18b	-1.27014	1.19822e-05
ENSMUSG00000022021	Diaph3	-1.26078	4.38035e-05
ENSMUSG00000020914	Top2a	-1.25918	7.92747e-15
ENSMUSG00000015880	Ncapg	-1.25808	1.82389e-06
ENSMUSG00000031004	Mki67	-1.25311	1.10906e-13
ENSMUSG00000030867	Plk1	-1.24916	7.08923e-07
ENSMUSG00000027306	Nusap1	-1.24163	1.37871e-07
ENSMUSG00000029516	Cit	-1.23827	4.29862e-07
ENSMUSG00000040084	Bub1b	-1.23116	2.15652e-08
ENSMUSG00000042489	Clspn	-1.22447	7.54131e-07
ENSMUSG00000020185	E2f7	-1.21907	0.000155953
ENSMUSG00000020897	Aurkb	-1.20406	2.83458e-06
ENSMUSG00000027699	Ect2	-1.19867	1.29313e-06
ENSMUSG00000007080	Pole	-1.19781	6.11996e-10
ENSMUSG00000006398	Cdc20	-1.19586	1.14821e-06
ENSMUSG00000017390	Aldoc	-1.19361	4.5671e-08
ENSMUSG00000036777	Anln	-1.18719	6.71364e-07
ENSMUSG00000020808	Pimreg	-1.1822	0.00349272
ENSMUSG00000037544	Dlgap5	-1.17806	4.30099e-07
ENSMUSG00000028873	Cdca8	-1.16765	1.47555e-07
ENSMUSG00000039187	Fanci	-1.16658	7.55049e-05
ENSMUSG00000037474	Dtl	-1.16394	6.55765e-09
ENSMUSG00000027331	Knstrn	-1.15602	0.000138882
ENSMUSG00000028702	Rad54l	-1.15376	2.63351e-06
ENSMUSG00000046179	E2f8	-1.14629	1.46355e-08
ENSMUSG00000076752	Tcrg-C2	-1.14615	0.00305071
ENSMUSG00000019942	Cdk1	-1.1439	8.66095e-07
ENSMUSG00000028718	Stil	-1.13958	0.000142693
ENSMUSG00000032221	Mns1	-1.13818	0.00345655
ENSMUSG00000030677	Kif22	-1.13414	0.000112639
ENSMUSG00000032400	Zwilch	-1.12925	2.59519e-06
ENSMUSG00000001517	Foxm1	-1.12501	2.37287e-08
ENSMUSG00000022033	Pbk	-1.1139	0.00325654
ENSMUSG00000062044	Lmtk3	-1.11142	0.00109672
ENSMUSG00000038379	Ttk	-1.11003	0.00465032
ENSMUSG00000048327	Ckap2l	-1.10858	2.36536e-07
ENSMUSG00000038943	Prc1	-1.10854	3.67369e-08
ENSMUSG00000037406	Htra4	-1.10761	1.60257e-05
ENSMUSG00000017146	Brca1	-1.10349	5.26993e-08
ENSMUSG00000033031	C330027C09Rik	-1.10282	2.37418e-07
ENSMUSG00000023505	Cdca3	-1.09843	4.0655e-06
ENSMUSG00000092060	Bend4	-1.0954	1.51604e-09
ENSMUSG00000034206	Polq	-1.09103	0.00181649
ENSMUSG00000003779	Kif20a	-1.08654	2.32322e-07
ENSMUSG00000039748	Exo1	-1.08231	0.00463733
ENSMUSG00000017716	Birc5	-1.07347	0.000112717
ENSMUSG00000074476	Spc24	-1.07016	0.00588464
ENSMUSG00000040204	Pclaf	-1.06526	6.35078e-07
ENSMUSG00000028312	Smc2	-1.06246	1.68685e-09
ENSMUSG00000078566	Bnip3	-1.05753	2.04378e-11
ENSMUSG00000048922	Cdca2	-1.04144	0.00065392
ENSMUSG00000026669	Mcm10	-1.03732	2.43837e-05
ENSMUSG00000029910	Mad2l1	-1.03421	6.84355e-06
ENSMUSG00000028068	Iqgap3	-1.03384	1.64073e-05
ENSMUSG00000053977	Cd8a	-1.0316	0.00538586
ENSMUSG00000026700	Tnfsf4	-1.02751	7.23197e-05
ENSMUSG00000026196	Bard1	-1.02744	0.000161252
ENSMUSG00000046591	Ticrr	-1.02325	7.06719e-05
ENSMUSG00000015568	Lpl	-1.01525	1.69293e-09
ENSMUSG00000000817	Fasl	-1.00878	8.53661e-06
ENSMUSG00000031262	Cenpi	-1.00785	0.00146905
ENSMUSG00000005233	Spc25	-1.00709	0.00063216
ENSMUSG00000079685	Ulbp1	-1.00708	4.74584e-05
ENSMUSG00000024056	Ndc80	-1.00147	0.000842816
ENSMUSG00000072082	Ccnf	-0.99877	0.000509007
ENSMUSG00000031756	Cenpn	-0.998015	0.00750067
ENSMUSG00000035455	Fignl1	-0.997152	0.00358916
ENSMUSG00000020649	Rrm2	-0.988261	4.5671e-08
ENSMUSG00000047534	Mis18bp1	-0.973881	0.00122585
ENSMUSG00000001228	Uhrf1	-0.970143	7.75181e-10
ENSMUSG00000051379	Flrt3	-0.963977	0.00029969
ENSMUSG00000009092	Derl3	-0.959624	0.00435936
ENSMUSG00000036768	Kif15	-0.95703	8.58861e-05
ENSMUSG00000024791	Cdca5	-0.955536	5.50499e-05
ENSMUSG00000038252	Ncapd2	-0.953228	1.79992e-07
ENSMUSG00000034906	Ncaph	-0.949088	1.25551e-05
ENSMUSG00000028207	Asph	-0.941865	6.83311e-07
ENSMUSG00000034329	Brip1	-0.940731	0.000210617
ENSMUSG00000030346	Rad51ap1	-0.936006	0.00251337
ENSMUSG00000032254	Kif23	-0.930481	5.25038e-06
ENSMUSG00000028212	Ccne2	-0.910072	0.0012287
ENSMUSG00000027469	Tpx2	-0.898217	7.40951e-06
ENSMUSG00000038587	Akap12	-0.897399	0.00478443
ENSMUSG00000025574	Tk1	-0.89403	2.49917e-05
ENSMUSG00000017499	Cdc6	-0.879798	0.000191541
ENSMUSG00000017861	Mybl2	-0.871349	0.000884601
ENSMUSG00000037313	Tacc3	-0.871337	6.5593e-08
ENSMUSG00000020974	Pole2	-0.86964	0.00704006
ENSMUSG00000023015	Racgap1	-0.866963	2.2856e-08
ENSMUSG00000025758	Plk4	-0.852361	0.00036464
ENSMUSG00000028587	Orc1	-0.840203	0.00245616
ENSMUSG00000037572	Wdhd1	-0.835875	3.00073e-07
ENSMUSG00000040274	Cdk6	-0.835555	1.40474e-05
ENSMUSG00000027496	Aurka	-0.834413	0.00133146
ENSMUSG00000023845	Lnpep	-0.834299	5.33829e-09
ENSMUSG00000021707	Dhfr	-0.834051	0.00302239
ENSMUSG00000032487	Ptgs2	-0.833961	1.63103e-05
ENSMUSG00000056394	Lig1	-0.830419	4.03945e-06
ENSMUSG00000041272	Tox	-0.830024	1.58364e-06
ENSMUSG00000002835	Chaf1a	-0.827307	1.34419e-05
ENSMUSG00000032218	Ccnb2	-0.823691	2.96275e-05
ENSMUSG00000028614	Ndc1	-0.822331	0.00065209
ENSMUSG00000049109	Themis	-0.818611	0.000220346
ENSMUSG00000029177	Cenpa	-0.814844	3.89995e-06
ENSMUSG00000022360	Atad2	-0.809159	1.08563e-07
ENSMUSG00000005470	Asf1b	-0.80739	0.00145074
ENSMUSG00000036109	Mbnl3	-0.802285	0.00729864
ENSMUSG00000050410	Tcf19	-0.800628	0.00449354
ENSMUSG00000051278	Zgrf1	-0.789599	0.000788777
ENSMUSG00000053044	Cd8b1	-0.789545	0.000437312
ENSMUSG00000045751	Mms22l	-0.770893	0.000493463
ENSMUSG00000060131	Atp8b4	-0.755904	2.43416e-07
ENSMUSG00000028832	Stmn1	-0.753408	0.000176854
ENSMUSG00000026826	Nr4a2	-0.753086	2.38912e-09
ENSMUSG00000030978	Rrm1	-0.747718	3.56484e-05
ENSMUSG00000007617	Homer1	-0.747697	5.33829e-09
ENSMUSG00000032815	Fanca	-0.743268	0.000800128
ENSMUSG00000019838	Slc16a10	-0.741995	5.28785e-06
ENSMUSG00000028864	Hgf	-0.737948	1.02336e-07
ENSMUSG00000025001	Hells	-0.732937	0.000110967
ENSMUSG00000001542	Ell2	-0.722153	0.000147019
ENSMUSG00000023908	Pkmyt1	-0.71581	0.000864246
ENSMUSG00000002870	Mcm2	-0.707783	9.29811e-07
ENSMUSG00000036943	Rab8b	-0.703519	2.90475e-06
ENSMUSG00000017550	Atad5	-0.702196	0.00350095
ENSMUSG00000006678	Pola1	-0.70085	0.000210416
ENSMUSG00000005410	Mcm5	-0.700177	0.000406744
ENSMUSG00000002068	Ccne1	-0.699392	0.00137694
ENSMUSG00000030657	Xylt1	-0.699322	0.00547015
ENSMUSG00000034926	Dhcr24	-0.699058	0.00813245
ENSMUSG00000024795	Kif20b	-0.691782	0.00029896
ENSMUSG00000044934	Zfp367	-0.69095	0.00056023
ENSMUSG00000021831	Ero1l	-0.683425	1.29256e-06
ENSMUSG00000023951	Vegfa	-0.680498	0.001771
ENSMUSG00000000028	Cdc45	-0.679946	0.00706209
ENSMUSG00000025395	Prim1	-0.678797	0.00217863
ENSMUSG00000027636	Sla2	-0.677462	0.000258097
ENSMUSG00000048498	Cd300e	-0.676938	0.000467972
ENSMUSG00000020841	Cpd	-0.675037	1.42201e-06
ENSMUSG00000049932	H2afx	-0.674374	0.000420654
ENSMUSG00000028044	Cks1b	-0.67428	0.00394484
ENSMUSG00000041859	Mcm3	-0.671419	4.08667e-06
ENSMUSG00000073434	Wdr90	-0.666528	1.08185e-05
ENSMUSG00000042225	Ammecr1	-0.665485	0.00656831
ENSMUSG00000009575	Cbx5	-0.66298	1.88996e-06
ENSMUSG00000027242	Wdr76	-0.660305	0.00221983
ENSMUSG00000033054	Npat	-0.659991	0.000154048
ENSMUSG00000030528	Blm	-0.658967	0.00570984
ENSMUSG00000004099	Dnmt1	-0.653658	1.48787e-09
ENSMUSG00000018362	Kpna2	-0.652378	0.00121917
ENSMUSG00000034218	Atm	-0.652122	0.000112292
ENSMUSG00000025019	Lcor	-0.651995	0.00432611
ENSMUSG00000051220	Ercc6l	-0.646029	0.00726381
ENSMUSG00000096954	Gdap10	-0.644264	1.91593e-05
ENSMUSG00000052270	Fpr2	-0.643465	0.00241138
ENSMUSG00000052889	Prkcb	-0.642022	0.000480841
ENSMUSG00000002944	Cd36	-0.636059	0.00307186
ENSMUSG00000054293	A630033H20Rik	-0.635062	0.00887607
ENSMUSG00000029687	Ezh2	-0.632746	0.000440037
ENSMUSG00000025059	Gk	-0.628645	7.10215e-07
ENSMUSG00000022673	Mcm4	-0.627852	2.18692e-06
ENSMUSG00000027030	Stk39	-0.625785	4.01451e-05
ENSMUSG00000057230	Aak1	-0.624419	0.000569675
ENSMUSG00000027074	Slc43a3	-0.620257	0.00597105
ENSMUSG00000024660	Incenp	-0.620115	2.04963e-05
ENSMUSG00000032555	Topbp1	-0.615755	2.17901e-06
ENSMUSG00000027035	Cers6	-0.614835	3.08007e-09
ENSMUSG00000061436	Hipk2	-0.60991	0.000733522
ENSMUSG00000027009	Itga4	-0.609331	4.06008e-05
ENSMUSG00000047959	Kcna3	-0.605049	0.00170835
ENSMUSG00000079339	Ifit1bl1	-0.603306	0.00097067
ENSMUSG00000074802	Gas2l3	-0.597066	0.000168649
ENSMUSG00000030257	Srgap3	-0.596224	0.00323673
ENSMUSG00000033792	Atp7a	-0.591799	0.000142693
ENSMUSG00000075470	Alg10b	-0.589626	0.00140362
ENSMUSG00000021690	Jmy	-0.587936	0.000878236
ENSMUSG00000001700	Gramd3	-0.581738	0.000335143
ENSMUSG00000035164	Zc3h12c	-0.581565	0.00588464
ENSMUSG00000037172	E330009J07Rik	-0.580963	0.00465346
ENSMUSG00000040710	St8sia4	-0.578763	9.77803e-05
ENSMUSG00000022586	Ly6i	-0.57709	0.000135731
ENSMUSG00000021624	Cd180	-0.573255	0.000650908
ENSMUSG00000026355	Mcm6	-0.572055	6.25493e-05
ENSMUSG00000027641	Rbl1	-0.570938	2.89338e-05
ENSMUSG00000020189	Osbpl8	-0.56817	1.35363e-05
ENSMUSG00000069793	Slfn9	-0.56641	0.00017521
ENSMUSG00000000838	Fmr1	-0.563956	2.45796e-06
ENSMUSG00000034708	Grn	-0.563778	2.00856e-05
ENSMUSG00000035024	Ncapd3	-0.563098	0.00021242
ENSMUSG00000036202	Rif1	-0.561143	0.000337066
ENSMUSG00000039899	Fgl2	-0.560278	1.27001e-05
ENSMUSG00000028341	Nr4a3	-0.559026	0.000163763
ENSMUSG00000029408	Abcb9	-0.557293	0.00352439
ENSMUSG00000054717	Hmgb2	-0.554194	7.38938e-06
ENSMUSG00000063659	Zbtb18	-0.553837	0.000158396
ENSMUSG00000040675	Mthfd1l	-0.551505	0.00542704
ENSMUSG00000020641	Rsad2	-0.547188	0.000379574
ENSMUSG00000025161	Slc16a3	-0.544603	4.94232e-05
ENSMUSG00000040549	Ckap5	-0.544307	9.04417e-07
ENSMUSG00000062070	Pgk1	-0.542971	0.000810501
ENSMUSG00000036067	Slc2a6	-0.540743	0.0021039
ENSMUSG00000033713	Foxn3	-0.540673	0.00152043
ENSMUSG00000029135	Fosl2	-0.53715	8.89669e-06
ENSMUSG00000023456	Tpi1	-0.537129	0.00121917
ENSMUSG00000027322	Siglec1	-0.534935	0.00980016
ENSMUSG00000058290	Espl1	-0.534895	0.000435509
ENSMUSG00000028560	Usp1	-0.530769	2.01588e-05
ENSMUSG00000029787	Avl9	-0.529885	0.000575084
ENSMUSG00000039994	Timeless	-0.52935	0.00313226
ENSMUSG00000027957	Slc35a3	-0.528731	0.00191754
ENSMUSG00000028282	Casp8ap2	-0.527412	0.000749245
ENSMUSG00000040907	Atp1a3	-0.527216	6.67006e-05
ENSMUSG00000044447	Dock5	-0.52678	0.00501786
ENSMUSG00000042082	Arsb	-0.522454	4.02922e-05
ENSMUSG00000042029	Ncapg2	-0.516757	0.00159586
ENSMUSG00000006494	Pdk1	-0.513845	4.00716e-05
ENSMUSG00000036698	Ago2	-0.510242	5.94547e-05
ENSMUSG00000011752	Pgam1	-0.506901	2.43662e-05
ENSMUSG00000045322	Tlr9	-0.505539	3.83322e-05
ENSMUSG00000034342	Cbl	-0.502895	0.0031273
ENSMUSG00000036875	Dna2	-0.501774	0.00171692
ENSMUSG00000029730	Mcm7	-0.49881	0.00128969
ENSMUSG00000034653	Ythdc2	-0.498571	0.00699489
ENSMUSG00000029009	Mthfr	-0.496857	2.49917e-05
ENSMUSG00000057406	Nsd2	-0.495973	5.54159e-05
ENSMUSG00000034480	Diaph2	-0.49579	0.00122176
ENSMUSG00000030102	Itpr1	-0.494708	3.59767e-05
ENSMUSG00000033454	Zbtb1	-0.492382	0.00658418
ENSMUSG00000035310	Lin54	-0.490792	0.000641336
ENSMUSG00000002107	Celf2	-0.489039	4.57702e-06
ENSMUSG00000027111	Itga6	-0.486674	0.00260939
ENSMUSG00000005102	Eif2ak4	-0.482755	0.00170052
ENSMUSG00000020120	Plek	-0.482685	0.00370042
ENSMUSG00000064127	Med14	-0.482444	0.000917078
ENSMUSG00000063663	Brwd3	-0.482259	0.00584647
ENSMUSG00000040943	Tet2	-0.481827	8.43746e-05
ENSMUSG00000027199	Gatm	-0.478224	0.000262636
ENSMUSG00000028228	Cpne3	-0.477963	0.000154048
ENSMUSG00000061175	Fnip2	-0.476859	0.00284163
ENSMUSG00000019726	Lyst	-0.476474	0.00974898
ENSMUSG00000024143	Rhoq	-0.476442	0.000359369
ENSMUSG00000038759	Nup205	-0.476035	0.000123816
ENSMUSG00000023169	Slc38a1	-0.475943	7.23197e-05
ENSMUSG00000024542	Cep192	-0.475417	0.000147019
ENSMUSG00000035954	Dock4	-0.475318	0.000128678
ENSMUSG00000041235	Chd7	-0.474964	0.000741638
ENSMUSG00000004319	Clcn3	-0.47492	0.00612359
ENSMUSG00000025612	Bach1	-0.47463	0.001893
ENSMUSG00000026827	Gpd2	-0.472661	0.000832659
ENSMUSG00000054693	Adam10	-0.470128	0.00118564
ENSMUSG00000027947	Il6ra	-0.469061	0.00169164
ENSMUSG00000024472	Dcp2	-0.467549	1.08185e-05
ENSMUSG00000020275	Rel	-0.466111	0.00186256
ENSMUSG00000021377	Dek	-0.465662	4.96323e-06
ENSMUSG00000047045	Tmem164	-0.465382	0.00230136
ENSMUSG00000028484	Psip1	-0.464862	0.00040376
ENSMUSG00000051457	Spn	-0.464605	0.00316777
ENSMUSG00000017929	B4galt5	-0.461349	1.08501e-05
ENSMUSG00000038658	Ric1	-0.461151	6.92875e-05
ENSMUSG00000032481	Smarcc1	-0.460013	0.00205546
ENSMUSG00000043940	Wdfy3	-0.459885	0.00111388
ENSMUSG00000019961	Tmpo	-0.458883	5.14306e-06
ENSMUSG00000002297	Dbf4	-0.457193	0.00634358
ENSMUSG00000020362	Cnot6	-0.457124	4.94232e-05
ENSMUSG00000029840	Mtpn	-0.457069	5.78386e-05
ENSMUSG00000031333	Abcb7	-0.456353	0.00416842
ENSMUSG00000006585	Cdt1	-0.456299	0.00345655
ENSMUSG00000022533	Atp13a3	-0.455552	0.000989676
ENSMUSG00000057329	Bcl2	-0.455001	0.00903786
ENSMUSG00000026434	Nucks1	-0.454924	0.000220403
ENSMUSG00000020395	Itk	-0.454703	0.00644658
ENSMUSG00000042323	Pbrm1	-0.454139	0.000176324
ENSMUSG00000031529	Tnks	-0.454067	0.00323673
ENSMUSG00000098557	Kctd12	-0.452684	0.000179059
ENSMUSG00000022555	Dgat1	-0.452406	0.00104674
ENSMUSG00000045827	Serpinb9	-0.451517	0.000123099
ENSMUSG00000058013	2011-09-01	-0.449428	0.000317352
ENSMUSG00000037536	Fbxo34	-0.449042	0.00610175
ENSMUSG00000035726	Supt16	-0.447497	8.6645e-05
ENSMUSG00000024054	Smchd1	-0.447259	0.000719698
ENSMUSG00000024077	Strn	-0.445979	0.00220851
ENSMUSG00000062949	Atp11c	-0.445682	0.00790596
ENSMUSG00000017418	Arl5b	-0.444467	0.00235589
ENSMUSG00000042444	Mindy2	-0.443948	0.00171692
ENSMUSG00000028403	Zdhhc21	-0.443735	0.00063216
ENSMUSG00000053101	Gpr141	-0.442702	0.00141601
ENSMUSG00000053641	Dennd4a	-0.442504	0.00326507
ENSMUSG00000029992	Gfpt1	-0.442135	0.000102265
ENSMUSG00000022139	Mbnl2	-0.440856	0.000106355
ENSMUSG00000024900	Cpt1a	-0.439758	9.17797e-05
ENSMUSG00000049658	Bdp1	-0.438821	0.00319927
ENSMUSG00000042410	Agps	-0.438772	0.000758171
ENSMUSG00000025017	Pik3ap1	-0.438741	0.000425459
ENSMUSG00000041219	Arhgap11a	-0.437135	0.00184063
ENSMUSG00000021824	Ap3m1	-0.436574	0.00743182
ENSMUSG00000042507	Elmsan1	-0.435072	0.00153395
ENSMUSG00000024742	Fen1	-0.434998	0.00826064
ENSMUSG00000032601	Prkar2a	-0.43466	0.00820134
ENSMUSG00000032253	Phip	-0.434212	0.00191754
ENSMUSG00000037119	Fam91a1	-0.431062	0.000113161
ENSMUSG00000006262	Mob1b	-0.430329	0.00379156
ENSMUSG00000003226	Ranbp2	-0.429488	0.000104995
ENSMUSG00000029313	Aff1	-0.429317	0.00291542
ENSMUSG00000056145	AI504432	-0.428077	0.000727882
ENSMUSG00000052085	Dock8	-0.427386	0.000319194
ENSMUSG00000037475	Thoc2	-0.427215	0.00100574
ENSMUSG00000063550	Nup98	-0.426208	0.000361614
ENSMUSG00000040225	Prrc2c	-0.424835	0.00138511
ENSMUSG00000021196	Pfkp	-0.423471	0.000793674
ENSMUSG00000030557	Mef2a	-0.423443	0.00508659
ENSMUSG00000021451	Sema4d	-0.423404	0.00081919
ENSMUSG00000018983	E2f2	-0.420453	0.00612359
ENSMUSG00000034640	Tiparp	-0.420291	0.00124963
ENSMUSG00000034349	Smc4	-0.420164	0.00075632
ENSMUSG00000030096	Slc6a6	-0.419429	0.000291284
ENSMUSG00000037434	Slc30a1	-0.418765	0.00146142
ENSMUSG00000024073	Birc6	-0.418493	0.000693878
ENSMUSG00000019920	Lims1	-0.417558	4.66793e-05
ENSMUSG00000005672	Kit	-0.417098	0.00854327
ENSMUSG00000026615	Eprs	-0.415836	0.000666106
ENSMUSG00000020024	Cep83	-0.415689	0.0030775
ENSMUSG00000063524	Eno1	-0.414886	0.00195879
ENSMUSG00000036053	Fmnl2	-0.414476	0.000762206
ENSMUSG00000030275	Etnk1	-0.41381	0.000100969
ENSMUSG00000070327	Rnf213	-0.411495	1.78522e-05
ENSMUSG00000026667	Uhmk1	-0.409676	0.00134812
ENSMUSG00000040351	Ankib1	-0.409664	0.00305071
ENSMUSG00000031838	Ifi30	-0.408985	0.00644757
ENSMUSG00000017291	Taok1	-0.408095	0.00449784
ENSMUSG00000001525	Tubb5	-0.406792	0.00570984
ENSMUSG00000014498	Ankrd52	-0.406532	0.00327761
ENSMUSG00000017548	Suz12	-0.405982	0.00257412
ENSMUSG00000053007	Creb5	-0.405737	0.00513269
ENSMUSG00000037416	Dmxl1	-0.403941	0.00282078
ENSMUSG00000041781	Cpsf2	-0.401763	0.00515706
ENSMUSG00000029202	Pds5a	-0.400687	0.00196594
ENSMUSG00000025860	Xiap	-0.400437	0.000210416
ENSMUSG00000029826	Zc3hav1	-0.400328	9.66142e-05
ENSMUSG00000063406	Tmed5	-0.400214	0.00301039
ENSMUSG00000021959	Lats2	-0.399622	0.00782519
ENSMUSG00000038608	Dock10	-0.399101	0.000878236
ENSMUSG00000040565	Btaf1	-0.397479	0.00075632
ENSMUSG00000030695	Aldoa	-0.397093	0.000917078
ENSMUSG00000035847	Ids	-0.392798	0.00638958
ENSMUSG00000066232	Ipo7	-0.392578	0.00439891
ENSMUSG00000045932	Ifit2	-0.392426	0.00772136
ENSMUSG00000019699	Akt3	-0.392414	0.00508659
ENSMUSG00000035093	Secisbp2l	-0.392319	0.00242572
ENSMUSG00000035311	Gnptab	-0.391862	0.000397225
ENSMUSG00000029366	Dck	-0.391804	0.00442672
ENSMUSG00000027580	Helz2	-0.39137	0.00129281
ENSMUSG00000018379	Srsf1	-0.389745	0.000210416
ENSMUSG00000021733	Slc4a7	-0.389524	0.00360443
ENSMUSG00000022180	Slc7a8	-0.388226	7.62706e-05
ENSMUSG00000026600	Soat1	-0.388128	0.0046325
ENSMUSG00000043019	Edem3	-0.387444	0.00874903
ENSMUSG00000095115	Itpripl2	-0.384403	0.00136317
ENSMUSG00000028277	Ube2j1	-0.384199	0.00655268
ENSMUSG00000009470	Tnpo1	-0.384164	0.00429869
ENSMUSG00000094483	Purb	-0.383884	0.00051409
ENSMUSG00000002227	Mov10	-0.382236	0.0027012
ENSMUSG00000020422	Tns3	-0.381989	0.00773267
ENSMUSG00000027087	Itgav	-0.381766	0.00737438
ENSMUSG00000027162	Lin7c	-0.3817	0.00571297
ENSMUSG00000031133	Arhgef6	-0.381162	0.00436499
ENSMUSG00000037896	Rcor1	-0.380599	0.00216406
ENSMUSG00000032661	Oas3	-0.37878	0.00489494
ENSMUSG00000031885	Cbfb	-0.377764	0.00017521
ENSMUSG00000019979	Apaf1	-0.377759	0.0046325
ENSMUSG00000026663	Atf6	-0.3775	0.00735825
ENSMUSG00000057335	Cep170	-0.377296	0.00833072
ENSMUSG00000038766	Gabpb2	-0.377229	0.00710313
ENSMUSG00000005034	Prkacb	-0.375592	0.000779669
ENSMUSG00000040990	Sh3kbp1	-0.375576	0.00656831
ENSMUSG00000049516	Spty2d1	-0.373056	0.0003293
ENSMUSG00000027007	Ssfa2	-0.372995	0.00976561
ENSMUSG00000038482	Tfdp1	-0.372825	0.00662449
ENSMUSG00000033487	Fndc3a	-0.372229	0.000209877
ENSMUSG00000028382	Ptbp3	-0.37173	0.000561728
ENSMUSG00000019943	Atp2b1	-0.371655	0.00199033
ENSMUSG00000021068	Nin	-0.37111	0.00800163
ENSMUSG00000026786	Apbb1ip	-0.370878	0.00577799
ENSMUSG00000040648	Ppip5k2	-0.370814	0.00425932
ENSMUSG00000020850	Prpf8	-0.369039	8.50803e-05
ENSMUSG00000038538	Ubn2	-0.368946	0.00651669
ENSMUSG00000062232	Rapgef2	-0.368498	0.000147019
ENSMUSG00000027763	Mbnl1	-0.367769	0.000701732
ENSMUSG00000042351	Grap2	-0.36737	0.00192152
ENSMUSG00000042129	Rassf4	-0.366459	0.00791376
ENSMUSG00000075376	Rc3h2	-0.366036	0.00787225
ENSMUSG00000041040	Fam117b	-0.3632	0.00245616
ENSMUSG00000020647	Ncoa1	-0.362634	0.00242126
ENSMUSG00000032097	Ddx6	-0.362297	0.0031273
ENSMUSG00000061136	Prpf40a	-0.36203	0.00181649
ENSMUSG00000032423	Syncrip	-0.361198	0.00104495
ENSMUSG00000049470	Aff4	-0.360313	0.00974898
ENSMUSG00000028337	Coro2a	-0.357515	0.00326932
ENSMUSG00000030830	Itgal	-0.357128	0.000910214
ENSMUSG00000061589	Dot1l	-0.356826	0.00416842
ENSMUSG00000028381	Ugcg	-0.355917	0.00287398
ENSMUSG00000026103	Gls	-0.355608	0.00368272
ENSMUSG00000022314	Rad21	-0.35506	0.00181649
ENSMUSG00000031278	Acsl4	-0.354071	0.00259538
ENSMUSG00000030536	Iqgap1	-0.353195	1.51218e-05
ENSMUSG00000025314	Ptprj	-0.353	0.00474272
ENSMUSG00000020893	Per1	-0.352656	0.00292872
ENSMUSG00000056268	Dennd1b	-0.352322	0.00274997
ENSMUSG00000024300	Myo1f	-0.351764	0.000454282
ENSMUSG00000031987	Egln1	-0.351283	0.00439891
ENSMUSG00000024079	Eif2ak2	-0.351086	0.000538876
ENSMUSG00000027366	Sppl2a	-0.350813	0.000711476
ENSMUSG00000034330	Plcg2	-0.35069	0.00390815
ENSMUSG00000043131	Mob1a	-0.350356	0.00121684
ENSMUSG00000026872	Zeb2	-0.349288	0.00370971
ENSMUSG00000054404	Slfn5	-0.348696	0.00449354
ENSMUSG00000048234	Rnf149	-0.346674	0.00152043
ENSMUSG00000006740	Kif5b	-0.345621	0.0019697
ENSMUSG00000020594	Pum2	-0.344181	0.00159586
ENSMUSG00000027288	Zfp106	-0.344135	0.00305071
ENSMUSG00000022443	Myh9	-0.344063	0.000142916
ENSMUSG00000025810	Nrp1	-0.343162	0.00874903
ENSMUSG00000025862	Stag2	-0.34118	0.00119055
ENSMUSG00000033596	Rfwd3	-0.341021	0.00992765
ENSMUSG00000020143	Dock2	-0.340631	0.00352417
ENSMUSG00000038855	Itpkb	-0.338609	0.00522426
ENSMUSG00000031309	Rps6ka3	-0.336998	0.00589962
ENSMUSG00000027340	Slc23a2	-0.335065	0.00483443
ENSMUSG00000017485	Top2b	-0.332786	0.00520701
ENSMUSG00000038023	Atp6v0a2	-0.332742	0.00903786
ENSMUSG00000024085	Man2a1	-0.331939	0.000638655
ENSMUSG00000025473	Adam8	-0.330855	0.00356391
ENSMUSG00000031715	Smarca5	-0.330645	0.0085396
ENSMUSG00000030759	Far1	-0.330386	0.00354196
ENSMUSG00000027852	Nras	-0.330122	0.00478906
ENSMUSG00000040383	Aqr	-0.329679	0.00717544
ENSMUSG00000031229	Atrx	-0.329475	0.00803256
ENSMUSG00000020152	Actr2	-0.328567	0.00201202
ENSMUSG00000021366	Hivep1	-0.328322	0.00376532
ENSMUSG00000036550	Cnot1	-0.326359	0.00818759
ENSMUSG00000020290	Xpo1	-0.326252	0.0016467
ENSMUSG00000031386	Hcfc1	-0.325664	0.00264916
ENSMUSG00000040725	Hnrnpul1	-0.32525	0.000556119
ENSMUSG00000021895	Arhgef3	-0.324634	0.00974898
ENSMUSG00000036427	Gpi1	-0.320773	0.00416842
ENSMUSG00000034593	Myo5a	-0.320644	0.00325366
ENSMUSG00000045210	Vcpip1	-0.3201	0.00373806
ENSMUSG00000032560	Dnajc13	-0.314128	0.00134812
ENSMUSG00000038127	Ccdc50	-0.313296	0.00728401
ENSMUSG00000050565	Tor1aip2	-0.311804	0.00199033
ENSMUSG00000030921	Trim30a	-0.310952	0.00442672
ENSMUSG00000020715	Ern1	-0.30927	0.00933176
ENSMUSG00000047126	Cltc	-0.308473	0.000719698
ENSMUSG00000019866	Crybg1	-0.307609	0.00771194
ENSMUSG00000020463	Ppp4r3b	-0.307007	0.00394079
ENSMUSG00000027381	Bcl2l11	-0.306722	0.00566399
ENSMUSG00000004040	Stat3	-0.302383	0.00138313
ENSMUSG00000026395	Ptprc	-0.300522	0.00209981
ENSMUSG00000040552	C3ar1	-0.295629	0.00974502
ENSMUSG00000032393	Dpp8	-0.293857	0.00887607
ENSMUSG00000037242	Clic4	-0.291274	0.0055519
ENSMUSG00000020917	Acly	-0.290089	0.00370817
ENSMUSG00000062014	Gmfb	-0.289388	0.0093532
ENSMUSG00000025366	Esyt1	-0.287507	0.00264057
ENSMUSG00000031555	Adam9	-0.287141	0.00893496
ENSMUSG00000032479	Map4	-0.286562	0.00868442
ENSMUSG00000010205	Raver1	-0.285836	0.00874935
ENSMUSG00000035042	Ccl5	-0.284115	0.00277648
ENSMUSG00000028820	Sfpq	-0.283139	0.00754188
ENSMUSG00000030530	Furin	-0.28102	0.00468319
ENSMUSG00000046434	Hnrnpa1	-0.278472	0.00784329
ENSMUSG00000026657	Frmd4a	-0.277586	0.00593021
ENSMUSG00000000275	Trim25	-0.267628	0.00614672
ENSMUSG00000005442	Cic	-0.255358	0.00897092
ENSMUSG00000025809	Itgb1	-0.253447	0.00345655
ENSMUSG00000028465	Tln1	-0.244817	0.00792883
ENSMUSG00000063457	Rps15	0.269596	0.00278554
ENSMUSG00000006333	Rps9	0.270152	0.00469586
ENSMUSG00000028234	Rps20	0.280996	0.00772136
ENSMUSG00000008668	Rps18	0.286582	0.00554516
ENSMUSG00000023944	Hsp90ab1	0.29019	0.00307186
ENSMUSG00000037563	Rps16	0.29898	0.00672945
ENSMUSG00000019505	Ubb	0.306442	0.000985951
ENSMUSG00000060938	Rpl26	0.308074	0.00257412
ENSMUSG00000064363	mt-Nd4	0.311031	0.00277648
ENSMUSG00000034892	Rps29	0.311246	0.00449784
ENSMUSG00000017009	Sdc4	0.312226	0.00119514
ENSMUSG00000034438	Gbp8	0.317202	0.00737438
ENSMUSG00000007892	Rplp1	0.323031	0.001771
ENSMUSG00000008348	Ubc	0.326021	0.00415878
ENSMUSG00000003873	Bax	0.334517	0.00538586
ENSMUSG00000024608	Rps14	0.343228	0.00318141
ENSMUSG00000064341	mt-Nd1	0.34385	0.000275988
ENSMUSG00000018585	Atox1	0.345595	0.00487267
ENSMUSG00000079641	Rpl39	0.355706	0.0019697
ENSMUSG00000030161	Gabarapl1	0.358954	0.00933176
ENSMUSG00000018572	Phf23	0.36175	0.00281772
ENSMUSG00000002395	Use1	0.363911	0.00351166
ENSMUSG00000001289	Pfdn5	0.369709	0.00272642
ENSMUSG00000006800	Sulf2	0.371463	0.000484764
ENSMUSG00000026628	Atf3	0.372023	0.000373682
ENSMUSG00000093674	Rpl41	0.377308	0.000335765
ENSMUSG00000046330	Rpl37a	0.385231	8.47952e-05
ENSMUSG00000062997	Rpl35	0.393285	0.000231946
ENSMUSG00000040997	Abhd4	0.393452	0.00685704
ENSMUSG00000027670	Ocstamp	0.395547	0.00504893
ENSMUSG00000018930	Ccl4	0.398592	0.00245616
ENSMUSG00000029204	Rhoh	0.40111	0.00841831
ENSMUSG00000020577	Tspan13	0.401692	0.000903632
ENSMUSG00000067288	Rps28	0.403476	0.00133478
ENSMUSG00000037706	Cd81	0.412465	0.00302239
ENSMUSG00000030157	Clec2d	0.41284	0.00192928
ENSMUSG00000090733	Rps27	0.412978	0.000885941
ENSMUSG00000048677	Tpcn2	0.413022	0.00181892
ENSMUSG00000057863	Rpl36	0.416032	0.000849665
ENSMUSG00000050621	Rps27rt	0.4251	0.000917078
ENSMUSG00000016252	Atp5e	0.425618	0.00739257
ENSMUSG00000029810	Tmem176b	0.426998	0.00326469
ENSMUSG00000021025	Nfkbia	0.427854	0.000131635
ENSMUSG00000062006	Rpl34	0.434256	0.000411242
ENSMUSG00000040952	Rps19	0.444953	8.56329e-06
ENSMUSG00000061983	Rps12	0.447502	2.60774e-05
ENSMUSG00000064373	Selenop	0.453337	0.00465193
ENSMUSG00000060147	Serpinb6a	0.453653	0.00651669
ENSMUSG00000023367	Tmem176a	0.455348	0.00100602
ENSMUSG00000030847	Bag3	0.471542	9.58023e-05
ENSMUSG00000003541	Ier3	0.472437	0.00151917
ENSMUSG00000028063	Lmna	0.48349	0.00641579
ENSMUSG00000024970	AI846148	0.484474	0.00813245
ENSMUSG00000036781	Rps27l	0.491265	0.00808693
ENSMUSG00000075706	Gpx4	0.496243	0.00011455
ENSMUSG00000003380	Rabac1	0.498665	0.00189664
ENSMUSG00000023905	Tnfrsf12a	0.503285	0.00678519
ENSMUSG00000027907	S100a11	0.505556	0.000793933
ENSMUSG00000035824	Tk2	0.505581	0.000592696
ENSMUSG00000039221	Rpl22l1	0.507804	0.00536606
ENSMUSG00000023067	Cdkn1a	0.512179	1.64949e-10
ENSMUSG00000049295	Zfp219	0.514526	0.00102199
ENSMUSG00000038393	Txnip	0.517747	2.92215e-06
ENSMUSG00000069516	Lyz2	0.522437	2.89338e-05
ENSMUSG00000039001	Rps21	0.523774	1.51218e-05
ENSMUSG00000038418	Egr1	0.524117	0.00150949
ENSMUSG00000021127	Zfp36l1	0.525869	7.22534e-07
ENSMUSG00000005483	Dnajb1	0.538778	0.000111374
ENSMUSG00000066684	Pilrb1	0.542172	0.00679903
ENSMUSG00000035314	Gdpd5	0.542737	0.00394079
ENSMUSG00000020205	Phlda1	0.549198	0.000685868
ENSMUSG00000073676	Hspe1	0.550185	3.15916e-05
ENSMUSG00000001552	Jup	0.557781	0.000711476
ENSMUSG00000027435	Cd93	0.564611	0.000777589
ENSMUSG00000024399	Ltb	0.565205	0.00427857
ENSMUSG00000017607	Tns4	0.566278	0.00615947
ENSMUSG00000051483	Cbr1	0.569052	0.00977282
ENSMUSG00000060591	Ifitm2	0.569323	0.00168438
ENSMUSG00000026048	Ercc5	0.571261	0.00065392
ENSMUSG00000030095	Tmem43	0.578986	5.21265e-05
ENSMUSG00000027495	Fam210b	0.580439	0.00707725
ENSMUSG00000022528	Hes1	0.581045	0.000574566
ENSMUSG00000033955	Tnks1bp1	0.581386	0.00245616
ENSMUSG00000035299	Mid1	0.584902	0.00164302
ENSMUSG00000023349	Clec4n	0.58667	6.58202e-05
ENSMUSG00000021701	Plk2	0.592398	0.00025859
ENSMUSG00000031995	St14	0.593315	0.00782519
ENSMUSG00000001288	Rarg	0.60653	0.000467972
ENSMUSG00000074063	Osgin1	0.609487	0.00450338
ENSMUSG00000053411	Cbx7	0.611062	0.00990588
ENSMUSG00000055200	Sertad3	0.611798	0.00522426
ENSMUSG00000031907	Zfp90	0.616061	0.000360135
ENSMUSG00000027663	Zmat3	0.620263	8.15628e-05
ENSMUSG00000002083	Bbc3	0.621747	0.00278828
ENSMUSG00000069792	Wfdc17	0.625523	0.000576517
ENSMUSG00000050578	Mmp13	0.630446	0.00106463
ENSMUSG00000033542	Arhgef5	0.634819	0.00363317
ENSMUSG00000032366	Tpm1	0.635788	0.00189301
ENSMUSG00000090958	Lrrc32	0.639077	0.00662281
ENSMUSG00000008540	Mgst1	0.639644	0.00639665
ENSMUSG00000041954	Tnfrsf18	0.644468	0.00279399
ENSMUSG00000020108	Ddit4	0.645317	0.000195562
ENSMUSG00000041959	S100a10	0.645802	5.21265e-05
ENSMUSG00000024401	Tnf	0.648572	2.047e-05
ENSMUSG00000035713	Usp35	0.651373	0.00955479
ENSMUSG00000058427	Cxcl2	0.652607	1.64256e-06
ENSMUSG00000052684	Jun	0.655717	1.03381e-07
ENSMUSG00000095041	AC149090.1	0.657129	6.12155e-08
ENSMUSG00000029484	Anxa3	0.657932	0.000477157
ENSMUSG00000026566	Mpzl1	0.662327	0.00621453
ENSMUSG00000020773	Trim47	0.665457	5.21265e-05
ENSMUSG00000022057	Adamdec1	0.669837	0.00656831
ENSMUSG00000038260	Trpm4	0.67178	0.00791376
ENSMUSG00000005413	Hmox1	0.678219	1.11904e-10
ENSMUSG00000030609	Aen	0.678449	0.000350532
ENSMUSG00000054065	Pkp3	0.678927	1.17559e-05
ENSMUSG00000031740	Mmp2	0.680579	9.89725e-05
ENSMUSG00000039521	Foxp3	0.682294	0.00401983
ENSMUSG00000030577	Cd22	0.683419	0.000413811
ENSMUSG00000026073	Il1r2	0.684252	9.50078e-09
ENSMUSG00000066682	Pilrb2	0.686911	0.000117745
ENSMUSG00000045502	Hcar2	0.686953	0.000284935
ENSMUSG00000024659	Anxa1	0.693341	0.000467972
ENSMUSG00000000303	Cdh1	0.695029	8.38705e-05
ENSMUSG00000001761	Smo	0.700488	0.00656831
ENSMUSG00000022220	Adcy4	0.702463	0.00655268
ENSMUSG00000061410	Zcchc14	0.703501	0.00639335
ENSMUSG00000066877	Nck2	0.716804	0.00136873
ENSMUSG00000022661	Cd200	0.717586	0.0016467
ENSMUSG00000025510	Cd151	0.724912	0.00264474
ENSMUSG00000020601	Trib2	0.735624	0.00535876
ENSMUSG00000001247	Lsr	0.741555	0.00153347
ENSMUSG00000047139	Cd24a	0.743956	1.63805e-05
ENSMUSG00000029075	Tnfrsf4	0.745952	0.00180147
ENSMUSG00000028082	Sh3d19	0.751992	0.00279399
ENSMUSG00000030114	Klrg1	0.753997	0.00163969
ENSMUSG00000021453	Gadd45g	0.754106	4.0655e-06
ENSMUSG00000032554	Trf	0.75442	1.98144e-05
ENSMUSG00000079037	Prnp	0.756899	0.00134812
ENSMUSG00000097039	Pvt1	0.769478	0.000875852
ENSMUSG00000006445	Epha2	0.769568	2.2712e-05
ENSMUSG00000064337	mt-Rnr1	0.778221	6.97978e-05
ENSMUSG00000003534	Ddr1	0.78086	0.0062471
ENSMUSG00000028860	Sytl1	0.787967	0.00431081
ENSMUSG00000030854	Ptpn5	0.794507	0.00651669
ENSMUSG00000060512	0610040J01Rik	0.795153	0.00380017
ENSMUSG00000037071	Scd1	0.797292	0.00416842
ENSMUSG00000045394	Epcam	0.798764	0.00336263
ENSMUSG00000018102	Hist1h2bc	0.79906	0.00370734
ENSMUSG00000042810	Krba1	0.801003	0.0046325
ENSMUSG00000016529	Il10	0.802127	7.77019e-05
ENSMUSG00000027002	Nckap1	0.803995	0.00130544
ENSMUSG00000027750	Postn	0.808583	8.58861e-05
ENSMUSG00000034936	Arl4d	0.814163	0.00267847
ENSMUSG00000037606	Osbpl5	0.816936	0.00619386
ENSMUSG00000034751	Mast4	0.81758	0.00349643
ENSMUSG00000025491	Ifitm1	0.82327	0.00105111
ENSMUSG00000006344	Ggt5	0.824651	0.000318982
ENSMUSG00000092203	1110038B12Rik	0.827578	8.31055e-06
ENSMUSG00000015619	Gata3	0.830443	0.000134327
ENSMUSG00000085385	Snhg17	0.832874	0.00148991
ENSMUSG00000034041	Lyl1	0.837138	2.75812e-05
ENSMUSG00000012889	Podnl1	0.837426	0.00577799
ENSMUSG00000043079	Synpo	0.844156	0.000936405
ENSMUSG00000030144	Clec4d	0.850406	7.68028e-06
ENSMUSG00000041845	Rhod	0.854567	0.00328154
ENSMUSG00000031502	Col4a1	0.857517	9.04368e-05
ENSMUSG00000042439	Zfp532	0.866927	0.00450338
ENSMUSG00000018417	Myo1b	0.869357	0.00245616
ENSMUSG00000032528	Vipr1	0.869435	0.000962424
ENSMUSG00000040734	Ppp1r13l	0.873114	0.00370734
ENSMUSG00000024736	Tmem132a	0.878789	0.000111738
ENSMUSG00000070436	Serpinh1	0.878823	0.000298169
ENSMUSG00000017493	Igfbp4	0.881859	0.00416842
ENSMUSG00000052911	Lamb2	0.883989	0.00108644
ENSMUSG00000020154	Ptprb	0.885694	0.00940384
ENSMUSG00000029166	Mapre3	0.891383	0.001453
ENSMUSG00000022074	Tnfrsf10b	0.892807	0.00580366
ENSMUSG00000040714	Klc3	0.900558	0.00728353
ENSMUSG00000019966	Kitl	0.90236	0.000409626
ENSMUSG00000023007	Prpf40b	0.907976	0.000488437
ENSMUSG00000022010	Tsc22d1	0.911106	5.02402e-11
ENSMUSG00000025151	Maged1	0.916524	0.000171927
ENSMUSG00000002985	Apoe	0.918235	1.00572e-18
ENSMUSG00000002233	Rhoc	0.918743	7.44581e-05
ENSMUSG00000019194	Scn1b	0.9206	0.00974898
ENSMUSG00000051236	Msrb3	0.925023	0.000719698
ENSMUSG00000038508	Gdf15	0.928605	0.00205152
ENSMUSG00000026883	Dab2ip	0.93356	4.36501e-05
ENSMUSG00000008167	Fbxw9	0.93445	0.000183174
ENSMUSG00000047963	Stbd1	0.940779	0.00294973
ENSMUSG00000022607	Ptk2	0.947267	0.00425176
ENSMUSG00000022893	Adamts1	0.951559	0.00209525
ENSMUSG00000001507	Itga3	0.952385	1.29956e-06
ENSMUSG00000031078	Cttn	0.954637	3.44388e-05
ENSMUSG00000064339	mt-Rnr2	0.961129	2.36795e-07
ENSMUSG00000027360	Hdc	0.966775	1.02336e-07
ENSMUSG00000030630	Fah	0.974612	0.00791997
ENSMUSG00000030208	Emp1	0.974779	1.17559e-05
ENSMUSG00000026335	Pam	0.975185	2.16659e-07
ENSMUSG00000031503	Col4a2	0.978137	2.32773e-06
ENSMUSG00000024769	Cdc42bpg	0.982092	5.63347e-06
ENSMUSG00000014791	Elmo3	0.985854	0.00884086
ENSMUSG00000024892	Pcx	0.997888	0.00743182
ENSMUSG00000037366	Pafah2	1.00505	0.00514413
ENSMUSG00000014599	Csf1	1.00711	1.10647e-05
ENSMUSG00000021796	Bmpr1a	1.00768	0.000331353
ENSMUSG00000026638	Irf6	1.01506	0.000105185
ENSMUSG00000019590	Cyb561	1.01566	0.00412482
ENSMUSG00000001504	Irx2	1.01898	0.000584847
ENSMUSG00000019851	Perp	1.0236	0.000192062
ENSMUSG00000026303	Mlph	1.02609	0.00228696
ENSMUSG00000036617	Etl4	1.02932	0.00307186
ENSMUSG00000026490	Cdc42bpa	1.03015	0.00121917
ENSMUSG00000021782	Dlg5	1.03419	0.00416842
ENSMUSG00000016382	Pls3	1.03698	0.000220346
ENSMUSG00000004105	Angptl2	1.03712	1.17559e-05
ENSMUSG00000033377	Palmd	1.03956	0.00479546
ENSMUSG00000035498	Cdcp1	1.04268	0.00125663
ENSMUSG00000041782	Lad1	1.05586	0.00289949
ENSMUSG00000047592	Nxpe5	1.05747	0.00470999
ENSMUSG00000020592	Sdc1	1.06128	7.26626e-05
ENSMUSG00000023232	Serinc2	1.06301	0.00208837
ENSMUSG00000021696	Elovl7	1.06506	0.00874903
ENSMUSG00000004864	Mapk13	1.06921	0.00257412
ENSMUSG00000029869	Ephb6	1.07513	0.00527342
ENSMUSG00000033170	Card10	1.07541	0.00081919
ENSMUSG00000074227	Spint2	1.07577	4.02568e-09
ENSMUSG00000022865	Cxadr	1.0777	0.000191578
ENSMUSG00000040447	Spns2	1.08041	0.000134327
ENSMUSG00000037907	Ankrd13b	1.08231	0.00280203
ENSMUSG00000036718	Micall2	1.09097	0.00877522
ENSMUSG00000001870	Ltbp1	1.10522	0.000683898
ENSMUSG00000029373	Pf4	1.10655	0.00321142
ENSMUSG00000034245	Hdac11	1.11173	0.00307186
ENSMUSG00000019987	Arg1	1.12035	2.04963e-05
ENSMUSG00000034382	AI661453	1.12101	0.00498447
ENSMUSG00000026072	Il1r1	1.12163	0.00838511
ENSMUSG00000024011	Pi16	1.13912	0.00105962
ENSMUSG00000036995	Asap3	1.14174	0.000286157
ENSMUSG00000027803	Wwtr1	1.14535	0.000394311
ENSMUSG00000030256	Bhlhe41	1.14785	1.29313e-06
ENSMUSG00000029781	Fkbp9	1.14789	4.74584e-05
ENSMUSG00000030410	Dmwd	1.15312	0.00701355
ENSMUSG00000020674	Pxdn	1.15332	8.61455e-06
ENSMUSG00000026639	Lamb3	1.15334	0.000298169
ENSMUSG00000050390	C77080	1.15535	6.75068e-05
ENSMUSG00000070473	Cldn3	1.15602	0.00255014
ENSMUSG00000029710	Ephb4	1.15749	0.000394749
ENSMUSG00000038146	Notch3	1.16066	3.17336e-05
ENSMUSG00000006576	Slc4a3	1.1636	0.00332068
ENSMUSG00000030770	Parva	1.17005	2.03928e-05
ENSMUSG00000005958	Ephb3	1.17513	0.000587243
ENSMUSG00000049521	Cdc42ep1	1.17834	0.000197664
ENSMUSG00000030281	Il17rc	1.17866	0.00625919
ENSMUSG00000030688	Stard10	1.18361	6.66672e-05
ENSMUSG00000038305	Spats2l	1.1888	0.00164229
ENSMUSG00000042116	Vwa1	1.19219	0.00394079
ENSMUSG00000042821	Snai1	1.1974	0.000369597
ENSMUSG00000012428	Steap4	1.20801	4.79322e-10
ENSMUSG00000050953	Gja1	1.21001	2.08444e-06
ENSMUSG00000033565	Rbfox2	1.21163	4.92175e-05
ENSMUSG00000030218	Mgp	1.22208	7.60875e-05
ENSMUSG00000091971	Hspa1a	1.22539	0.00190838
ENSMUSG00000054889	Dsp	1.23	1.69334e-05
ENSMUSG00000032135	Mcam	1.23309	1.56234e-07
ENSMUSG00000048200	Cracr2b	1.23425	0.000189119
ENSMUSG00000048458	Fam212b	1.23493	0.00977282
ENSMUSG00000020902	Ntn1	1.24003	2.2627e-05
ENSMUSG00000055546	Timd4	1.24122	0.00639335
ENSMUSG00000030739	Myh14	1.24238	0.00393179
ENSMUSG00000044674	Fzd1	1.24281	0.000907062
ENSMUSG00000027860	Vangl1	1.25347	0.00245616
ENSMUSG00000038351	Sgsm2	1.25905	5.7665e-07
ENSMUSG00000022651	Retnlg	1.26067	0.00336263
ENSMUSG00000027868	Tbx15	1.26252	2.53825e-06
ENSMUSG00000001930	Vwf	1.26667	0.000564873
ENSMUSG00000031451	Gas6	1.2737	3.7476e-07
ENSMUSG00000031933	Izumo1r	1.28098	9.18131e-07
ENSMUSG00000038781	Stap2	1.28379	7.58791e-05
ENSMUSG00000027546	Atp9a	1.2852	7.51845e-09
ENSMUSG00000032548	Slco2a1	1.28674	2.55115e-05
ENSMUSG00000028517	Plpp3	1.297	1.38781e-05
ENSMUSG00000040187	Arntl2	1.30689	0.000480751
ENSMUSG00000072812	Ahnak2	1.30861	0.00546845
ENSMUSG00000030605	Mfge8	1.30918	0.00947435
ENSMUSG00000005268	Prlr	1.3112	4.30967e-06
ENSMUSG00000008601	Rab25	1.31253	0.000390673
ENSMUSG00000017002	Slpi	1.31403	5.14306e-06
ENSMUSG00000051375	Pcdh1	1.31463	0.00554516
ENSMUSG00000022098	Bmp1	1.31704	1.98144e-05
ENSMUSG00000024940	Ltbp3	1.31816	2.27782e-07
ENSMUSG00000020282	Rhbdf1	1.3223	8.54532e-07
ENSMUSG00000053646	Plxnb1	1.32625	2.17901e-06
ENSMUSG00000031150	Ccdc120	1.33113	0.00398526
ENSMUSG00000021359	Tfap2a	1.33594	0.00108601
ENSMUSG00000027257	Pacsin3	1.33857	0.000567544
ENSMUSG00000056071	S100a9	1.3513	4.70915e-17
ENSMUSG00000024511	Rab27b	1.3565	0.00743182
ENSMUSG00000067297	Ifit1bl2	1.35723	0.00656831
ENSMUSG00000090877	Hspa1b	1.35848	6.91689e-05
ENSMUSG00000031871	Cdh5	1.36154	1.50021e-08
ENSMUSG00000001025	S100a6	1.36496	0.0001228
ENSMUSG00000070047	Fat1	1.367	1.14821e-06
ENSMUSG00000027800	Tm4sf1	1.367	0.00606644
ENSMUSG00000029761	Cald1	1.37035	0.000397818
ENSMUSG00000018378	Cuedc1	1.3704	0.00011455
ENSMUSG00000000753	Serpinf1	1.37159	0.000707531
ENSMUSG00000034930	Rtkn	1.3747	0.00065392
ENSMUSG00000038463	Olfml2b	1.37503	0.0031273
ENSMUSG00000021745	Ptprg	1.37504	0.000872788
ENSMUSG00000020427	Igfbp3	1.37892	1.14821e-06
ENSMUSG00000019734	Tmc4	1.38217	6.62669e-08
ENSMUSG00000050737	Ptges	1.38976	0.000298003
ENSMUSG00000002900	Lamb1	1.40048	1.92969e-06
ENSMUSG00000031737	Irx5	1.40363	9.98272e-05
ENSMUSG00000037681	Esyt3	1.40742	0.000394311
ENSMUSG00000017724	Etv4	1.41055	0.00451927
ENSMUSG00000017737	Mmp9	1.41088	2.02856e-09
ENSMUSG00000032419	Tbx18	1.41505	0.00181649
ENSMUSG00000023972	Ptk7	1.41917	1.27742e-06
ENSMUSG00000015094	Npdc1	1.42534	4.08667e-06
ENSMUSG00000036256	Igfbp7	1.42855	2.2063e-08
ENSMUSG00000029386	Tctn2	1.43052	0.00606302
ENSMUSG00000017446	C1qtnf1	1.43209	5.81509e-05
ENSMUSG00000050014	Apol10b	1.43456	0.000741638
ENSMUSG00000055980	Irs1	1.43607	0.00810618
ENSMUSG00000026180	Cxcr2	1.43668	1.08563e-07
ENSMUSG00000020044	Timp3	1.43918	0.00208837
ENSMUSG00000031647	Mfap3l	1.4451	0.00118564
ENSMUSG00000028919	Arhgef19	1.44853	0.00446256
ENSMUSG00000037095	Lrg1	1.44921	1.23678e-05
ENSMUSG00000009185	Ccl8	1.45452	0.00023589
ENSMUSG00000031734	Irx3	1.45499	3.41818e-05
ENSMUSG00000031955	Bcar1	1.45516	3.47571e-06
ENSMUSG00000070509	Rgma	1.45568	0.00177986
ENSMUSG00000019467	Arhgef25	1.45569	0.00129281
ENSMUSG00000045045	Lrfn4	1.45592	0.00125112
ENSMUSG00000041757	Plekha6	1.46294	0.000159015
ENSMUSG00000048486	Fitm2	1.46367	5.06399e-06
ENSMUSG00000029859	Epha1	1.46417	0.00509139
ENSMUSG00000027832	Ptx3	1.46856	0.00681858
ENSMUSG00000015970	Chdh	1.47387	5.21265e-05
ENSMUSG00000029309	Sparcl1	1.48343	1.49061e-05
ENSMUSG00000025083	Afap1l2	1.48687	0.00178553
ENSMUSG00000035342	Lzts2	1.49077	2.46248e-06
ENSMUSG00000036446	Lum	1.49169	0.00394079
ENSMUSG00000056054	S100a8	1.49304	4.65542e-12
ENSMUSG00000035451	Foxa1	1.49979	4.93089e-06
ENSMUSG00000001435	Col18a1	1.50584	9.94518e-10
ENSMUSG00000022146	Osmr	1.50661	1.02697e-07
ENSMUSG00000020937	Plcd3	1.50775	0.0026518
ENSMUSG00000026249	Serpine2	1.51076	4.41003e-12
ENSMUSG00000022548	Apod	1.51224	7.58791e-05
ENSMUSG00000027954	Efna1	1.51259	0.00212227
ENSMUSG00000025608	Podxl	1.5179	7.14355e-06
ENSMUSG00000028763	Hspg2	1.52836	6.7308e-08
ENSMUSG00000001672	Marveld3	1.52955	0.00239486
ENSMUSG00000051159	Cited1	1.53799	0.000824111
ENSMUSG00000042845	Wfdc12	1.53822	0.000900963
ENSMUSG00000022286	Grhl2	1.53841	2.09129e-05
ENSMUSG00000062312	Erbb2	1.57477	9.86234e-07
ENSMUSG00000036545	Adamts2	1.57582	0.00405228
ENSMUSG00000097767	Miat	1.57638	0.00355598
ENSMUSG00000022203	Efs	1.57971	0.00219168
ENSMUSG00000026574	Dpt	1.58273	0.00106555
ENSMUSG00000031722	Hp	1.58408	5.94134e-16
ENSMUSG00000028115	Bnipl	1.58527	0.000736256
ENSMUSG00000041734	Kirrel	1.58599	9.35319e-06
ENSMUSG00000021765	Fst	1.58982	0.000654805
ENSMUSG00000044309	Apol7c	1.59043	0.000512343
ENSMUSG00000028128	F3	1.59137	5.68893e-09
ENSMUSG00000052560	Cpne8	1.60575	0.000986081
ENSMUSG00000015647	Lama5	1.60919	0.000287537
ENSMUSG00000029070	Mxra8	1.61438	0.000360135
ENSMUSG00000020758	Itgb4	1.61993	0.00294973
ENSMUSG00000041189	Chrnb1	1.62135	2.79987e-05
ENSMUSG00000046387	Pcdhb17	1.62628	0.00947618
ENSMUSG00000002504	Slc9a3r2	1.62663	2.89779e-06
ENSMUSG00000025885	Myo5b	1.63267	0.000103339
ENSMUSG00000028111	Ctsk	1.6408	4.02922e-05
ENSMUSG00000031520	Vegfc	1.65239	0.00121917
ENSMUSG00000034684	Sema3f	1.65955	0.000104995
ENSMUSG00000029718	Pcolce	1.6599	0.00121348
ENSMUSG00000078234	Klhdc7a	1.66651	0.00349065
ENSMUSG00000039865	Slc44a3	1.6679	6.83324e-06
ENSMUSG00000032332	Col12a1	1.67422	0.00013288
ENSMUSG00000001583	Tnk1	1.67981	2.04729e-05
ENSMUSG00000023043	Krt18	1.68588	0.000114882
ENSMUSG00000051225	Fam83a	1.70668	0.00324607
ENSMUSG00000016024	Lbp	1.71081	2.77779e-08
ENSMUSG00000038168	P3h2	1.71321	0.00061627
ENSMUSG00000074364	Ehd2	1.71456	2.16377e-09
ENSMUSG00000044393	Dsg2	1.71692	1.55695e-06
ENSMUSG00000022261	Sdc2	1.726	2.26656e-10
ENSMUSG00000039405	Prss23	1.73022	0.000201363
ENSMUSG00000016494	Cd34	1.73294	2.13723e-05
ENSMUSG00000039457	Ppl	1.73619	4.74584e-05
ENSMUSG00000021508	Cxcl14	1.74381	0.000704524
ENSMUSG00000023224	Serping1	1.74942	0.00489494
ENSMUSG00000040852	Plekhh2	1.7509	7.26696e-07
ENSMUSG00000004951	Hspb1	1.75195	9.96463e-12
ENSMUSG00000067006	Serpinb5	1.76239	1.41346e-06
ENSMUSG00000061353	Cxcl12	1.77507	1.98144e-05
ENSMUSG00000031778	Cx3cl1	1.77789	0.000409132
ENSMUSG00000041120	Nbl1	1.78371	0.000145573
ENSMUSG00000005251	Ripk4	1.78525	7.75181e-10
ENSMUSG00000031548	Sfrp1	1.7854	1.22867e-06
ENSMUSG00000022032	Scara5	1.79589	1.17559e-05
ENSMUSG00000041134	Cyyr1	1.80012	0.00804062
ENSMUSG00000003617	Cp	1.82364	1.08563e-07
ENSMUSG00000023039	Krt7	1.82388	0.00369364
ENSMUSG00000031558	Slit2	1.82437	0.000505522
ENSMUSG00000001946	Esam	1.82672	0.000484764
ENSMUSG00000022505	Emp2	1.83025	6.99972e-13
ENSMUSG00000003379	Cd79a	1.83309	1.33495e-05
ENSMUSG00000031274	Col4a5	1.8359	2.42915e-12
ENSMUSG00000038521	C1s1	1.8379	0.00196254
ENSMUSG00000044646	Zbtb7c	1.83864	0.00478906
ENSMUSG00000043088	Il17re	1.8453	0.00412715
ENSMUSG00000021567	Nkd2	1.84793	8.6645e-05
ENSMUSG00000001036	Epn2	1.84853	1.13792e-06
ENSMUSG00000089876	Tmem102	1.85155	0.00373903
ENSMUSG00000040488	Ltbp4	1.85966	1.35425e-08
ENSMUSG00000049382	Krt8	1.8724	6.41048e-05
ENSMUSG00000061527	Krt5	1.88158	6.83324e-06
ENSMUSG00000035258	Abi3bp	1.89644	7.23357e-05
ENSMUSG00000038776	Ephx1	1.9059	1.08418e-30
ENSMUSG00000037852	Cpe	1.90685	3.20398e-05
ENSMUSG00000031480	Thsd1	1.90968	0.00764602
ENSMUSG00000020241	Col6a2	1.91537	0.0079894
ENSMUSG00000033191	Tie1	1.9235	5.05272e-06
ENSMUSG00000047907	Tshz2	1.92516	0.00449354
ENSMUSG00000028909	Ptpru	1.9354	0.00315849
ENSMUSG00000028532	Cachd1	1.94756	0.00344334
ENSMUSG00000040543	Pitpnm3	1.96004	0.000394311
ENSMUSG00000016526	Dyrk3	1.96303	5.3894e-12
ENSMUSG00000018339	Gpx3	1.96795	0.000322591
ENSMUSG00000008734	Gprc5b	1.9729	0.000573541
ENSMUSG00000006014	Prg4	1.97683	0.00112683
ENSMUSG00000053024	Cntn2	1.98185	0.00193144
ENSMUSG00000078122	F630028O10Rik	1.98187	0.000181515
ENSMUSG00000033453	Adamts15	1.98817	0.000368218
ENSMUSG00000020810	Cygb	1.99666	0.00483443
ENSMUSG00000046470	Sox18	2.00686	0.00980016
ENSMUSG00000027656	Wisp2	2.01161	0.000112224
ENSMUSG00000039349	C130074G19Rik	2.04167	0.00518604
ENSMUSG00000056492	Adgrf5	2.08058	8.71963e-08
ENSMUSG00000068744	Psrc1	2.08473	1.18843e-17
ENSMUSG00000001240	Ramp2	2.09208	0.00292872
ENSMUSG00000035818	Plekhs1	2.11681	8.97525e-06
ENSMUSG00000032875	Arhgef17	2.12034	2.33519e-12
ENSMUSG00000029189	Sel1l3	2.12133	0.000430931
ENSMUSG00000020905	Usp43	2.12777	0.000872867
ENSMUSG00000037060	Cavin3	2.12968	0.00277648
ENSMUSG00000039167	Adgrl4	2.14215	0.00740311
ENSMUSG00000023046	Igfbp6	2.14288	0.00703325
ENSMUSG00000063558	Aox1	2.14324	0.00134465
ENSMUSG00000007783	Cpt1c	2.1489	0.000112224
ENSMUSG00000022623	Shank3	2.16014	0.000189119
ENSMUSG00000079018	Ly6c1	2.17263	4.54733e-13
ENSMUSG00000025064	Col17a1	2.17265	0.000519003
ENSMUSG00000030598	Fbxo17	2.17669	0.00636226
ENSMUSG00000041548	Hspb8	2.18246	1.81301e-18
ENSMUSG00000074457	S100a16	2.1888	7.93625e-10
ENSMUSG00000025089	Gfra1	2.19554	0.000194948
ENSMUSG00000017978	Cadps2	2.20006	1.43221e-05
ENSMUSG00000037989	Wnk2	2.21968	4.852e-07
ENSMUSG00000026921	Egfl7	2.2231	4.57702e-06
ENSMUSG00000057836	Xlr3a	2.22907	0.0056987
ENSMUSG00000031736	Crnde	2.25619	5.50499e-05
ENSMUSG00000089804	Gm16136	2.25756	0.00133889
ENSMUSG00000045545	Krt14	2.26051	8.02987e-06
ENSMUSG00000015134	Aldh1a3	2.26713	4.58948e-06
ENSMUSG00000046186	Cd109	2.26955	4.05647e-06
ENSMUSG00000024810	Il33	2.28594	3.6516e-13
ENSMUSG00000037035	Inhbb	2.28689	8.55146e-20
ENSMUSG00000024673	Ms4a1	2.2898	4.74497e-06
ENSMUSG00000034845	Plvap	2.2965	1.66608e-15
ENSMUSG00000028978	Nos3	2.30692	0.00336263
ENSMUSG00000006386	Tek	2.30932	0.0086302
ENSMUSG00000044921	Rassf9	2.31194	0.00369199
ENSMUSG00000028600	Podn	2.33015	0.00128476
ENSMUSG00000020473	Aebp1	2.33881	0.00129281
ENSMUSG00000006369	Fbln1	2.35526	3.44388e-05
ENSMUSG00000026051	1500015O10Rik	2.36438	0.000462331
ENSMUSG00000007655	Cav1	2.36901	2.64991e-16
ENSMUSG00000034037	Fgd5	2.38883	0.00157088
ENSMUSG00000063130	Calml3	2.38938	6.26943e-07
ENSMUSG00000032125	Robo4	2.39162	6.9822e-06
ENSMUSG00000041801	Phlda3	2.3954	1.75712e-19
ENSMUSG00000069917	Hba-a2	2.42178	6.91689e-05
ENSMUSG00000020000	Moxd1	2.42655	5.89463e-09
ENSMUSG00000038295	Atg9b	2.43359	2.50059e-07
ENSMUSG00000066113	Adamtsl1	2.47242	0.00522426
ENSMUSG00000040841	Six5	2.48011	0.000189119
ENSMUSG00000017723	Wfdc2	2.48784	1.6524e-21
ENSMUSG00000033576	Apol6	2.50309	0.000108728
ENSMUSG00000041577	Prelp	2.5096	4.84383e-17
ENSMUSG00000021702	Thbs4	2.51392	0.00147401
ENSMUSG00000022367	Has2	2.52015	0.00065209
ENSMUSG00000026413	Pkp1	2.55227	2.80217e-07
ENSMUSG00000034457	Eda2r	2.56544	1.02708e-16
ENSMUSG00000069919	Hba-a1	2.58388	3.31032e-07
ENSMUSG00000027408	Cpxm1	2.59407	2.6787e-09
ENSMUSG00000034634	Ly6d	2.60198	2.18398e-45
ENSMUSG00000048706	Lurap1l	2.6116	3.7476e-07
ENSMUSG00000041445	Mmrn2	2.61198	6.74264e-08
ENSMUSG00000040170	Fmo2	2.61758	5.14477e-08
ENSMUSG00000039676	Capsl	2.62044	5.12387e-09
ENSMUSG00000024713	Pcsk5	2.62876	0.00405123
ENSMUSG00000021950	Anxa8	2.66113	1.33655e-22
ENSMUSG00000029661	Col1a2	2.67499	0.00449784
ENSMUSG00000026580	Selp	2.6854	4.94232e-05
ENSMUSG00000058354	Krt6a	2.6951	3.66202e-07
ENSMUSG00000052305	Hbb-bs	2.73749	1.35376e-13
ENSMUSG00000023391	Dlx2	2.76231	0.00417904
ENSMUSG00000073599	Ecscr	2.76436	5.61083e-10
ENSMUSG00000028364	Tnc	2.79325	1.86961e-11
ENSMUSG00000001506	Col1a1	2.83174	0.00235368
ENSMUSG00000030155	Clec2e	2.84188	1.06918e-06
ENSMUSG00000037872	Ackr1	2.86239	0.00347694
ENSMUSG00000046818	Ddit4l	2.87297	4.39283e-14
ENSMUSG00000063060	Sox7	2.8766	2.69463e-05
ENSMUSG00000054146	Krt15	2.8907	3.22935e-11
ENSMUSG00000042453	Reln	2.91064	0.00130615
ENSMUSG00000036856	Wnt4	2.9132	1.14515e-06
ENSMUSG00000032484	Ngp	2.94277	0.000758171
ENSMUSG00000073940	Hbb-bt	2.95729	4.93089e-06
ENSMUSG00000023886	Smoc2	2.96437	6.29735e-05
ENSMUSG00000043613	Mmp3	2.97604	8.39715e-14
ENSMUSG00000019929	Dcn	2.99528	1.18843e-17
ENSMUSG00000004655	Aqp1	3.01276	7.60033e-21
ENSMUSG00000035186	Ubd	3.05593	1.71251e-20
ENSMUSG00000066705	Fxyd6	3.06173	0.000185381
ENSMUSG00000026616	Cr2	3.07424	0.000941908
ENSMUSG00000029868	Trpv6	3.08011	0.000354734
ENSMUSG00000056313	Tcim	3.10671	7.52066e-11
ENSMUSG00000037254	Itih2	3.1159	1.99471e-17
ENSMUSG00000030043	Tacr1	3.12338	3.83322e-05
ENSMUSG00000024727	Trpm6	3.12524	5.7665e-07
ENSMUSG00000042474	Fcmr	3.14329	3.51568e-05
ENSMUSG00000032925	Itgbl1	3.1917	0.000528403
ENSMUSG00000045761	Togaram2	3.20291	2.44537e-06
ENSMUSG00000044534	Ackr2	3.29559	0.00167404
ENSMUSG00000047040	Prr15l	3.31636	0.000408605
ENSMUSG00000030724	Cd19	3.35706	1.93699e-09
ENSMUSG00000030562	Nox4	3.37652	1.46907e-07
ENSMUSG00000026817	Ak1	3.49825	3.34953e-23
ENSMUSG00000037813	D630003M21Rik	3.50041	0.00109656
ENSMUSG00000051076	Vtcn1	3.51304	4.61249e-07
ENSMUSG00000028262	Clca3a2	3.53465	3.22613e-11
ENSMUSG00000054641	Mmrn1	3.5829	1.39247e-10
ENSMUSG00000041378	Cldn5	3.62502	2.49079e-05
ENSMUSG00000085851	4921518K17Rik	3.68433	0.00977282
ENSMUSG00000022435	Upk3a	3.83582	0.00476975
ENSMUSG00000028255	Clca1	4.02405	1.10906e-13
ENSMUSG00000042436	Mfap4	4.07433	1.42719e-05
ENSMUSG00000030862	Cpxm2	4.12388	0.00838511
ENSMUSG00000023064	Sncg	4.16907	4.55742e-08
ENSMUSG00000056025	Clca3a1	4.22486	0.000132714
ENSMUSG00000029126	Nsg1	4.22772	0.00948035
ENSMUSG00000060188	Cxcl17	4.29625	9.60307e-08
ENSMUSG00000094686	Ccl21a	4.37455	0.00234631
ENSMUSG00000036596	Cpz	4.46559	0.00833322
ENSMUSG00000059654	Reg1	5.01326	0.00577799
ENSMUSG00000006574	Slc4a1	5.86711	0.000279273

## Sheet: tumor-stromal cells
Table S1C: Differentially expressed genes witin Tumor/Stromal cells
ensembl ID	gene symbol	log2-fold change	Adjusted p-value
		(Irr vs Non-Irr)
ENSMUSG00000095079	Igha	-7.118	2.27665e-06
ENSMUSG00000022226	Mcpt2	-6.92881	4.10641e-05
ENSMUSG00000094420	Igkv10-96	-6.84293	0.000197405
ENSMUSG00000076612	Ighg2c	-6.82088	2.5334e-07
ENSMUSG00000076609	Igkc	-6.31027	2.97298e-13
ENSMUSG00000061769	Klra6	-5.67214	0.00349932
ENSMUSG00000022227	Mcpt1	-5.57146	0.00126015
ENSMUSG00000036925	Mucl2	-5.28535	0.00632473
ENSMUSG00000067149	Jchain	-5.16966	3.80229e-06
ENSMUSG00000059934	Prh1	-5.13652	0.000122651
ENSMUSG00000015441	Gzmf	-4.8826	0.00439125
ENSMUSG00000067543	Prb1	-4.64215	3.37441e-17
ENSMUSG00000029306	Ibsp	-4.46225	8.03294e-06
ENSMUSG00000032356	Rasgrf1	-4.00825	9.91051e-08
ENSMUSG00000032181	Scg3	-3.83914	0.00345925
ENSMUSG00000029275	Gfi1	-3.79586	0.0019469
ENSMUSG00000008153	Clstn3	-3.70231	0.00588906
ENSMUSG00000055415	Atp10b	-3.69441	0.00481254
ENSMUSG00000053399	Adamts18	-3.60333	0.00215897
ENSMUSG00000076752	Tcrg-C2	-3.52532	0.0045035
ENSMUSG00000052736	Klrc2	-3.52509	0.00250074
ENSMUSG00000028360	Slc44a5	-3.50542	0.00161323
ENSMUSG00000058499	Pip	-3.45312	4.61939e-05
ENSMUSG00000085684	4930469K13Rik	-3.33986	1.29692e-06
ENSMUSG00000052889	Prkcb	-3.26837	0.000467384
ENSMUSG00000022483	Col2a1	-3.26595	0.000571662
ENSMUSG00000041272	Tox	-3.20855	0.00267462
ENSMUSG00000033831	Fgb	-3.17492	2.4252e-12
ENSMUSG00000076472	Trbv15	-3.14423	0.00497889
ENSMUSG00000042345	Ubash3a	-3.03776	0.00363127
ENSMUSG00000049608	Gpr55	-2.97253	0.00629452
ENSMUSG00000032021	Crtam	-2.95246	0.00745991
ENSMUSG00000050272	Dscam	-2.89628	0.00257771
ENSMUSG00000070419	Cyp3a57	-2.88658	0.00299095
ENSMUSG00000050296	Abca12	-2.87802	2.50643e-16
ENSMUSG00000071341	Egr4	-2.83014	0.000228088
ENSMUSG00000073008	Gpr174	-2.80959	0.00608314
ENSMUSG00000030167	Klrc1	-2.80668	0.00242305
ENSMUSG00000037202	Prf1	-2.79657	0.000941095
ENSMUSG00000020884	Asgr1	-2.78638	0.000149661
ENSMUSG00000027219	Slc28a2	-2.78203	0.00835789
ENSMUSG00000040569	Slc26a7	-2.76381	0.000200692
ENSMUSG00000074923	Pak6	-2.75581	0.00602145
ENSMUSG00000026770	Il2ra	-2.74356	0.00599611
ENSMUSG00000007034	Slc44a4	-2.74295	0.00914492
ENSMUSG00000066438	Plekhd1	-2.73009	0.0019855
ENSMUSG00000026700	Tnfsf4	-2.72587	0.00303398
ENSMUSG00000013338	Fer1l4	-2.69604	2.81284e-06
ENSMUSG00000026070	Il18r1	-2.66862	0.00211033
ENSMUSG00000087149	Itih5l-ps	-2.66433	8.38705e-13
ENSMUSG00000037280	Galnt6	-2.61483	0.000987489
ENSMUSG00000053541	Gm4759	-2.61216	0.00279601
ENSMUSG00000026610	Esrrg	-2.59699	2.45934e-09
ENSMUSG00000032281	Acsbg1	-2.59609	0.000314993
ENSMUSG00000026573	Xcl1	-2.58931	0.00232127
ENSMUSG00000000031	H19	-2.56775	7.01846e-08
ENSMUSG00000028463	Car9	-2.56575	9.73632e-09
ENSMUSG00000068129	Cst7	-2.56339	0.00508429
ENSMUSG00000070501	Ifi214	-2.55538	0.00647312
ENSMUSG00000024989	Cep55	-2.53687	1.1478e-06
ENSMUSG00000031870	Pgr	-2.5233	8.38132e-09
ENSMUSG00000028175	Depdc1a	-2.50697	0.000331467
ENSMUSG00000095104	Esp15	-2.50394	1.28742e-10
ENSMUSG00000061577	Adgrg5	-2.49466	0.00403397
ENSMUSG00000005373	Mlxipl	-2.48663	0.00457194
ENSMUSG00000028927	Padi2	-2.47717	1.3897e-05
ENSMUSG00000020911	Krt19	-2.46314	7.34985e-05
ENSMUSG00000039981	Zc3h12d	-2.45392	0.0036804
ENSMUSG00000037446	Tulp1	-2.45312	0.000450098
ENSMUSG00000040204	Pclaf	-2.45087	1.76775e-07
ENSMUSG00000096001	2610528A11Rik	-2.438	5.43992e-07
ENSMUSG00000029829	Tmem213	-2.41779	0.00084027
ENSMUSG00000045871	Slitrk6	-2.4127	6.16914e-10
ENSMUSG00000047344	Lancl3	-2.41194	0.00174022
ENSMUSG00000021804	Rgr	-2.4111	0.00993276
ENSMUSG00000030156	Cd69	-2.40905	5.10198e-05
ENSMUSG00000029281	Smr2	-2.39759	8.23129e-05
ENSMUSG00000034023	Fancd2	-2.39751	0.00188612
ENSMUSG00000029204	Rhoh	-2.39656	0.0064008
ENSMUSG00000036006	Ripor2	-2.38965	0.0012939
ENSMUSG00000028972	Car6	-2.38713	6.06434e-20
ENSMUSG00000027326	Knl1	-2.37954	8.75328e-05
ENSMUSG00000020914	Top2a	-2.37821	5.62415e-15
ENSMUSG00000001349	Cnn1	-2.37628	0.00924944
ENSMUSG00000002266	Zim1	-2.36561	0.000225132
ENSMUSG00000038600	Atp6v0a4	-2.3649	8.33962e-11
ENSMUSG00000031662	Snx20	-2.36123	0.00745622
ENSMUSG00000056078	Lipm	-2.36051	1.58796e-05
ENSMUSG00000048621	Gm6377	-2.35837	0.00141153
ENSMUSG00000092060	Bend4	-2.35541	8.51635e-05
ENSMUSG00000020788	Atp2a3	-2.35002	1.51514e-20
ENSMUSG00000003452	Bicd1	-2.34951	1.54201e-08
ENSMUSG00000067276	Capn6	-2.33916	1.94657e-12
ENSMUSG00000000739	Sult5a1	-2.33205	0.00797988
ENSMUSG00000039131	Gipc2	-2.31331	2.3112e-05
ENSMUSG00000074715	Ccl28	-2.30969	1.0305e-05
ENSMUSG00000023927	Satb1	-2.30946	0.00324958
ENSMUSG00000055373	Fut9	-2.29486	0.00106853
ENSMUSG00000015355	Cd48	-2.29169	0.00267261
ENSMUSG00000028626	Col9a2	-2.29065	0.00304082
ENSMUSG00000030849	Fgfr2	-2.28994	3.9697e-24
ENSMUSG00000026605	Cenpf	-2.27919	7.14065e-08
ENSMUSG00000030165	Klrd1	-2.2698	0.00513715
ENSMUSG00000029075	Tnfrsf4	-2.26774	0.00884559
ENSMUSG00000018554	Ybx2	-2.26504	0.000326358
ENSMUSG00000040969	Arhgef38	-2.26502	1.16291e-05
ENSMUSG00000022034	Esco2	-2.25905	0.00520438
ENSMUSG00000031004	Mki67	-2.25755	2.50855e-20
ENSMUSG00000031165	Was	-2.25698	0.0047091
ENSMUSG00000036768	Kif15	-2.25652	5.08722e-05
ENSMUSG00000059149	Mfsd4a	-2.2564	6.61718e-05
ENSMUSG00000086596	Susd5	-2.24373	5.38042e-14
ENSMUSG00000025422	Agap2	-2.23967	0.00765915
ENSMUSG00000050359	Sprr1a	-2.23125	3.70083e-06
ENSMUSG00000027376	Prom2	-2.22893	2.33714e-05
ENSMUSG00000035683	Melk	-2.21517	0.000734632
ENSMUSG00000042489	Clspn	-2.19859	8.20502e-05
ENSMUSG00000006269	Atp6v1b1	-2.19192	6.18025e-19
ENSMUSG00000029830	Svopl	-2.19011	0.00256313
ENSMUSG00000074892	B3galt5	-2.17696	1.89687e-05
ENSMUSG00000036902	Neto2	-2.17352	0.00442664
ENSMUSG00000034116	Vav1	-2.17079	0.00125652
ENSMUSG00000046591	Ticrr	-2.16707	0.000353644
ENSMUSG00000024131	Slc3a1	-2.1364	0.00295194
ENSMUSG00000027379	Bub1	-2.13575	3.49537e-06
ENSMUSG00000041431	Ccnb1	-2.11846	4.23559e-05
ENSMUSG00000033214	Slitrk5	-2.11222	3.11436e-05
ENSMUSG00000004709	Cd244	-2.10801	0.00471804
ENSMUSG00000047230	Cldn2	-2.10564	4.10941e-16
ENSMUSG00000046598	Bdh1	-2.09662	2.2118e-15
ENSMUSG00000041831	Sytl3	-2.0934	0.000199044
ENSMUSG00000030616	Sytl2	-2.08572	0.00229221
ENSMUSG00000041372	B4galnt3	-2.0794	1.78533e-05
ENSMUSG00000044156	Hepacam2	-2.07371	5.04813e-14
ENSMUSG00000001444	Tbx21	-2.07255	0.00786219
ENSMUSG00000001095	Slc13a2	-2.06734	4.62984e-12
ENSMUSG00000063296	Tmem117	-2.06312	0.000439001
ENSMUSG00000002668	Dennd1c	-2.05834	0.00788129
ENSMUSG00000051397	Tacstd2	-2.05582	6.18006e-09
ENSMUSG00000028587	Orc1	-2.0541	0.0060964
ENSMUSG00000025813	Homer2	-2.05213	5.47969e-18
ENSMUSG00000028782	Adgrb2	-2.05116	1.26e-08
ENSMUSG00000079620	Muc4	-2.05088	3.95897e-09
ENSMUSG00000026826	Nr4a2	-2.02381	1.34523e-15
ENSMUSG00000051735	Rinl	-2.023	0.00258307
ENSMUSG00000020573	Pik3cg	-2.0181	0.00137023
ENSMUSG00000021886	Gpr65	-2.01484	0.00746798
ENSMUSG00000025161	Slc16a3	-2.01456	1.00768e-06
ENSMUSG00000022240	Ctnnd2	-2.01335	2.72551e-15
ENSMUSG00000032373	Car12	-2.00822	1.19593e-20
ENSMUSG00000032446	Eomes	-2.00449	7.48437e-05
ENSMUSG00000028341	Nr4a3	-2.00444	0.00377241
ENSMUSG00000085282	Gm15663	-2.00066	0.00418965
ENSMUSG00000027792	Bche	-1.99726	0.00862603
ENSMUSG00000050808	Muc15	-1.99503	1.41338e-09
ENSMUSG00000047146	Tet1	-1.99049	1.40133e-06
ENSMUSG00000090582	Gm17024	-1.9898	2.09595e-07
ENSMUSG00000024696	Lpxn	-1.98966	0.00709974
ENSMUSG00000035407	Kank4	-1.989	5.03611e-12
ENSMUSG00000023169	Slc38a1	-1.98503	7.05529e-11
ENSMUSG00000032076	Cadm1	-1.97993	2.19692e-13
ENSMUSG00000074802	Gas2l3	-1.97308	0.00681291
ENSMUSG00000058290	Espl1	-1.96688	9.97389e-06
ENSMUSG00000037337	Map4k1	-1.96688	0.0024842
ENSMUSG00000046179	E2f8	-1.96314	4.17863e-05
ENSMUSG00000028943	Espn	-1.95958	3.27638e-07
ENSMUSG00000039396	Neil3	-1.95826	0.00386049
ENSMUSG00000015880	Ncapg	-1.95814	9.1562e-05
ENSMUSG00000040084	Bub1b	-1.94958	1.8348e-07
ENSMUSG00000022899	Slc15a2	-1.94201	1.84029e-41
ENSMUSG00000024791	Cdca5	-1.94191	0.000546475
ENSMUSG00000042249	Grk3	-1.93104	8.68764e-08
ENSMUSG00000040111	Gramd1b	-1.92784	1.73038e-09
ENSMUSG00000033737	Fndc3c1	-1.92744	3.37398e-11
ENSMUSG00000024186	Rgs11	-1.91883	6.48832e-09
ENSMUSG00000011632	Pinlyp	-1.90883	2.0325e-06
ENSMUSG00000019368	Sec14l4	-1.89679	0.00200022
ENSMUSG00000047861	Foxi1	-1.89566	2.57557e-30
ENSMUSG00000004872	Pax3	-1.8897	5.28796e-08
ENSMUSG00000083161	Gm11427	-1.87965	0.00423268
ENSMUSG00000057880	Abat	-1.8794	0.00145228
ENSMUSG00000027452	Acss1	-1.87688	8.25088e-20
ENSMUSG00000007617	Homer1	-1.87059	1.8258e-25
ENSMUSG00000002265	Peg3	-1.86603	9.95996e-30
ENSMUSG00000028212	Ccne2	-1.86589	9.11685e-07
ENSMUSG00000006777	Krt23	-1.86266	8.20614e-12
ENSMUSG00000018983	E2f2	-1.86108	5.41339e-06
ENSMUSG00000078566	Bnip3	-1.85965	8.77012e-11
ENSMUSG00000032827	Ppp1r9a	-1.85135	5.9504e-12
ENSMUSG00000029245	Epha5	-1.84532	0.00315692
ENSMUSG00000051378	Kif18b	-1.84466	0.00023542
ENSMUSG00000027016	Zfp385b	-1.84324	0.00104169
ENSMUSG00000049191	Rtl5	-1.8414	0.00198394
ENSMUSG00000027715	Ccna2	-1.83627	1.34879e-06
ENSMUSG00000020649	Rrm2	-1.83616	2.24774e-06
ENSMUSG00000025207	Sema4g	-1.83543	0.000473598
ENSMUSG00000039748	Exo1	-1.8354	0.00959188
ENSMUSG00000084803	5830444B04Rik	-1.83412	0.00072479
ENSMUSG00000002055	Spag5	-1.82643	2.28288e-11
ENSMUSG00000063430	Wscd2	-1.82416	1.56799e-05
ENSMUSG00000034570	Inpp5j	-1.81815	0.000345798
ENSMUSG00000087141	Plcxd2	-1.81578	0.00512431
ENSMUSG00000022033	Pbk	-1.81492	0.00204014
ENSMUSG00000039187	Fanci	-1.81043	0.00229221
ENSMUSG00000020808	Pimreg	-1.80621	0.00542821
ENSMUSG00000030337	Vamp1	-1.80184	6.44812e-15
ENSMUSG00000029414	Kntc1	-1.79241	0.000207445
ENSMUSG00000024056	Ndc80	-1.78476	0.00322174
ENSMUSG00000038943	Prc1	-1.77223	5.16275e-09
ENSMUSG00000035455	Fignl1	-1.77163	0.0021171
ENSMUSG00000062044	Lmtk3	-1.76761	0.00247547
ENSMUSG00000027306	Nusap1	-1.76522	0.00026454
ENSMUSG00000000385	Tmprss2	-1.75822	0.000250743
ENSMUSG00000025150	Cbr2	-1.75778	6.27203e-19
ENSMUSG00000017499	Cdc6	-1.75542	2.76645e-05
ENSMUSG00000036019	Tmtc2	-1.7551	4.67887e-15
ENSMUSG00000055333	Fat2	-1.7504	5.18838e-10
ENSMUSG00000003227	Edar	-1.74988	0.00216569
ENSMUSG00000026683	Nuf2	-1.74811	0.00115581
ENSMUSG00000039323	Igfbp2	-1.74601	2.0947e-29
ENSMUSG00000020897	Aurkb	-1.73342	0.00113741
ENSMUSG00000017146	Brca1	-1.71231	0.000414495
ENSMUSG00000042793	Lgr6	-1.71172	1.7762e-08
ENSMUSG00000029923	Rab19	-1.71166	0.00157282
ENSMUSG00000031551	Ido1	-1.70553	9.05767e-05
ENSMUSG00000029177	Cenpa	-1.69887	4.11959e-05
ENSMUSG00000020183	Cpm	-1.69324	2.43575e-06
ENSMUSG00000044201	Cdc25c	-1.6898	0.00322071
ENSMUSG00000027323	Rad51	-1.68559	2.88439e-05
ENSMUSG00000024109	Nrxn1	-1.68292	3.188e-06
ENSMUSG00000027007	Ssfa2	-1.67526	1.7218e-16
ENSMUSG00000038128	Camk4	-1.67505	0.00768724
ENSMUSG00000041540	Sox5	-1.6683	1.35377e-08
ENSMUSG00000048922	Cdca2	-1.66772	0.00163722
ENSMUSG00000022021	Diaph3	-1.66629	0.00039078
ENSMUSG00000020566	Atp6v1c2	-1.66411	2.01844e-15
ENSMUSG00000055675	Kbtbd11	-1.66353	0.00917787
ENSMUSG00000028702	Rad54l	-1.65546	0.00234678
ENSMUSG00000029282	Amtn	-1.65537	8.78259e-09
ENSMUSG00000022376	Adcy8	-1.65022	2.15722e-07
ENSMUSG00000030087	Klf15	-1.64904	0.00194263
ENSMUSG00000022322	Shcbp1	-1.64828	0.00259261
ENSMUSG00000003824	Syce2	-1.63701	0.00167741
ENSMUSG00000027699	Ect2	-1.63464	0.000104873
ENSMUSG00000028278	Rragd	-1.63146	0.00500255
ENSMUSG00000068874	Selenbp1	-1.63018	1.41725e-06
ENSMUSG00000023243	Kcnk5	-1.62429	4.88306e-17
ENSMUSG00000007080	Pole	-1.62298	8.50295e-05
ENSMUSG00000044788	Fads6	-1.62189	1.67008e-06
ENSMUSG00000027469	Tpx2	-1.62178	0.000186673
ENSMUSG00000020140	Lgr5	-1.62036	3.33177e-20
ENSMUSG00000019942	Cdk1	-1.61918	8.78509e-07
ENSMUSG00000007888	Crlf1	-1.61719	5.05321e-08
ENSMUSG00000031636	Pdlim3	-1.61711	9.50493e-12
ENSMUSG00000049690	Nckap5	-1.60918	0.00831525
ENSMUSG00000012443	Kif11	-1.60094	1.49412e-05
ENSMUSG00000026768	Itga8	-1.59972	1.92395e-05
ENSMUSG00000023015	Racgap1	-1.59644	4.4502e-11
ENSMUSG00000030867	Plk1	-1.59638	3.8688e-05
ENSMUSG00000005672	Kit	-1.59624	1.1377e-20
ENSMUSG00000039452	Snx22	-1.59401	0.000125979
ENSMUSG00000033952	Aspm	-1.58665	2.31072e-05
ENSMUSG00000028654	Mycl	-1.58465	0.004534
ENSMUSG00000073988	Ttpa	-1.57837	0.00348025
ENSMUSG00000030671	Pde3b	-1.57705	0.00475205
ENSMUSG00000031610	Scrg1	-1.57571	0.00956368
ENSMUSG00000020493	Prr11	-1.56806	0.000507163
ENSMUSG00000047205	Dusp18	-1.56493	2.55669e-09
ENSMUSG00000032265	Fam46a	-1.56419	4.84329e-12
ENSMUSG00000027966	Col11a1	-1.55983	3.94389e-13
ENSMUSG00000019852	Arfgef3	-1.55355	0.00130271
ENSMUSG00000049649	Gpr3	-1.55201	0.00911149
ENSMUSG00000031284	Pak3	-1.54955	0.000353157
ENSMUSG00000001249	Hpn	-1.54926	0.000203951
ENSMUSG00000032254	Kif23	-1.54605	0.000886216
ENSMUSG00000027035	Cers6	-1.54519	0.00511341
ENSMUSG00000042359	Osbpl6	-1.54464	0.0037028
ENSMUSG00000037474	Dtl	-1.52902	0.00443029
ENSMUSG00000020607	Fam84a	-1.52512	8.11046e-12
ENSMUSG00000033308	Dpyd	-1.52165	0.00194618
ENSMUSG00000031089	Slc6a14	-1.51964	0.00985143
ENSMUSG00000087107	AI662270	-1.51144	0.000390541
ENSMUSG00000030413	Pglyrp1	-1.51045	8.01018e-07
ENSMUSG00000050957	Insl6	-1.5097	6.72908e-05
ENSMUSG00000053702	Nebl	-1.50185	0.00931205
ENSMUSG00000039943	Plcb4	-1.50174	9.64982e-17
ENSMUSG00000017716	Birc5	-1.4992	2.37741e-05
ENSMUSG00000028289	Epha7	-1.49918	1.59195e-27
ENSMUSG00000031389	Arhgap4	-1.49623	0.0040964
ENSMUSG00000022949	Clic6	-1.49485	8.42115e-16
ENSMUSG00000037544	Dlgap5	-1.49023	0.00861089
ENSMUSG00000021803	Cdhr1	-1.48864	6.89488e-12
ENSMUSG00000045328	Cenpe	-1.48832	1.90455e-05
ENSMUSG00000040276	Pacsin1	-1.48503	0.00385817
ENSMUSG00000032202	Rab27a	-1.46909	0.000207558
ENSMUSG00000033730	Egr3	-1.46706	6.7713e-10
ENSMUSG00000036169	Sostdc1	-1.46594	6.13673e-05
ENSMUSG00000020651	Slc26a4	-1.46454	0.000283044
ENSMUSG00000045667	Smtnl2	-1.46418	0.00313996
ENSMUSG00000028068	Iqgap3	-1.46179	0.000223461
ENSMUSG00000056174	Col8a2	-1.46128	8.68055e-08
ENSMUSG00000000792	Slc5a5	-1.46038	4.57343e-05
ENSMUSG00000051517	Arhgef39	-1.45475	0.000309524
ENSMUSG00000035105	Egln3	-1.45474	1.71211e-17
ENSMUSG00000036875	Dna2	-1.45276	0.00716526
ENSMUSG00000020865	Abcc3	-1.44623	0.00833976
ENSMUSG00000001228	Uhrf1	-1.44421	5.89512e-08
ENSMUSG00000022853	Ehhadh	-1.44355	0.00300749
ENSMUSG00000032013	Trim29	-1.43469	0.000246824
ENSMUSG00000058897	Col25a1	-1.42969	2.97413e-09
ENSMUSG00000096883	Shisa8	-1.42815	0.00347736
ENSMUSG00000053398	Phgdh	-1.4214	8.96758e-08
ENSMUSG00000051043	Gprc5c	-1.41561	3.91312e-11
ENSMUSG00000027331	Knstrn	-1.41512	1.06244e-05
ENSMUSG00000032218	Ccnb2	-1.41438	4.54454e-07
ENSMUSG00000020275	Rel	-1.41431	0.00130271
ENSMUSG00000017390	Aldoc	-1.41341	1.61037e-15
ENSMUSG00000001763	Tspan33	-1.41189	0.000383817
ENSMUSG00000027346	Gpcpd1	-1.40801	1.06114e-16
ENSMUSG00000031303	Map3k15	-1.40601	0.00544601
ENSMUSG00000022986	Krt75	-1.40572	0.000189329
ENSMUSG00000031849	Comp	-1.40341	0.00275708
ENSMUSG00000028527	Ak4	-1.3999	0.000272317
ENSMUSG00000038677	Scube3	-1.39984	2.37598e-05
ENSMUSG00000034435	Tmem30b	-1.39685	5.14909e-07
ENSMUSG00000027397	Slc20a1	-1.39596	6.38718e-28
ENSMUSG00000053414	Hunk	-1.39444	0.000187008
ENSMUSG00000035852	Misp	-1.39053	0.00648875
ENSMUSG00000042724	Map3k9	-1.39005	4.17365e-05
ENSMUSG00000061397	Krt79	-1.38912	0.00173395
ENSMUSG00000063531	Sema3e	-1.38722	0.0001043
ENSMUSG00000006398	Cdc20	-1.38634	1.92121e-06
ENSMUSG00000023505	Cdca3	-1.38612	6.74446e-05
ENSMUSG00000028678	Kif2c	-1.38408	0.00648974
ENSMUSG00000027508	Pag1	-1.37004	0.00407022
ENSMUSG00000023951	Vegfa	-1.3628	6.82995e-21
ENSMUSG00000041219	Arhgap11a	-1.36276	1.27946e-07
ENSMUSG00000026039	Sgo2a	-1.36178	0.00221222
ENSMUSG00000033022	Cdo1	-1.35829	0.00165867
ENSMUSG00000028967	Errfi1	-1.35487	8.39998e-10
ENSMUSG00000034295	Fhod3	-1.34784	8.01018e-07
ENSMUSG00000049321	Zfp2	-1.34725	0.00971408
ENSMUSG00000024302	Dtna	-1.34329	0.00163783
ENSMUSG00000039364	Sectm1b	-1.34113	1.00505e-13
ENSMUSG00000022309	Angpt1	-1.34039	0.00285126
ENSMUSG00000019737	Syne4	-1.33952	5.3762e-07
ENSMUSG00000044934	Zfp367	-1.33347	4.72573e-07
ENSMUSG00000037509	Arhgef4	-1.33168	0.00306605
ENSMUSG00000029449	Rhof	-1.3298	0.00894933
ENSMUSG00000024795	Kif20b	-1.32753	0.000117691
ENSMUSG00000028873	Cdca8	-1.32476	0.000293152
ENSMUSG00000026315	Serpinb8	-1.32286	8.80697e-10
ENSMUSG00000022696	Sidt1	-1.31993	1.95177e-06
ENSMUSG00000004633	Chn2	-1.31564	6.85652e-10
ENSMUSG00000010663	Fads1	-1.31475	1.08751e-18
ENSMUSG00000021136	Smoc1	-1.30781	3.4057e-19
ENSMUSG00000055421	Pcdh9	-1.3045	1.78434e-05
ENSMUSG00000034282	Evpl	-1.30261	8.52631e-09
ENSMUSG00000034981	Parm1	-1.29984	1.27348e-11
ENSMUSG00000026090	2010300C02Rik	-1.29579	5.19989e-06
ENSMUSG00000041147	Brca2	-1.2912	0.00101476
ENSMUSG00000031093	Dock11	-1.28968	0.00246103
ENSMUSG00000030650	Tmc5	-1.28343	0.00647379
ENSMUSG00000026576	Atp1b1	-1.28319	4.15292e-14
ENSMUSG00000005640	Insrr	-1.27851	0.000144703
ENSMUSG00000026779	Mastl	-1.27527	0.00601792
ENSMUSG00000020974	Pole2	-1.27505	0.00429821
ENSMUSG00000023034	Nr4a1	-1.27225	1.77553e-09
ENSMUSG00000025323	Sp4	-1.26817	3.1283e-06
ENSMUSG00000022360	Atad2	-1.26446	2.52001e-10
ENSMUSG00000026380	Tfcp2l1	-1.26443	2.43501e-08
ENSMUSG00000028718	Stil	-1.26173	0.00271426
ENSMUSG00000029228	Lnx1	-1.2592	0.000824641
ENSMUSG00000005470	Asf1b	-1.25917	0.00279601
ENSMUSG00000020330	Hmmr	-1.25659	0.000919498
ENSMUSG00000028312	Smc2	-1.25202	8.96178e-06
ENSMUSG00000037341	Slc9a7	-1.25135	0.00480783
ENSMUSG00000027330	Cdc25b	-1.25096	0.000973778
ENSMUSG00000028699	Tspan1	-1.25069	0.00486256
ENSMUSG00000052951	C130021I20Rik	-1.24901	0.00507846
ENSMUSG00000037110	Ralgapa2	-1.24703	9.07156e-08
ENSMUSG00000035638	Muc20	-1.24613	3.67052e-13
ENSMUSG00000040570	Rundc3b	-1.23709	0.007049
ENSMUSG00000029359	Tesc	-1.23351	1.20916e-09
ENSMUSG00000025574	Tk1	-1.23222	5.41933e-05
ENSMUSG00000020173	Cobl	-1.22925	4.43177e-05
ENSMUSG00000058248	Kcnh1	-1.22861	0.000526364
ENSMUSG00000086429	Gt(ROSA)26Sor	-1.22804	0.000319835
ENSMUSG00000038587	Akap12	-1.22549	8.42954e-09
ENSMUSG00000074489	Bglap3	-1.22244	0.000661058
ENSMUSG00000051367	Six1	-1.21981	0.00503431
ENSMUSG00000034311	Kif4	-1.2189	0.00732769
ENSMUSG00000036528	Ppfibp2	-1.21813	0.00118025
ENSMUSG00000027030	Stk39	-1.21663	4.35513e-18
ENSMUSG00000042029	Ncapg2	-1.21544	6.04181e-05
ENSMUSG00000031133	Arhgef6	-1.21543	0.000147783
ENSMUSG00000019817	Plagl1	-1.2111	3.87759e-06
ENSMUSG00000073405	H2-T-ps	-1.2077	0.00335619
ENSMUSG00000027603	Ggt7	-1.20404	0.0040404
ENSMUSG00000060429	Sntb1	-1.20384	8.42945e-10
ENSMUSG00000022883	Robo1	-1.2022	1.28545e-09
ENSMUSG00000017418	Arl5b	-1.20148	2.06411e-08
ENSMUSG00000021573	Tppp	-1.20136	4.12984e-06
ENSMUSG00000068748	Ptprz1	-1.1948	2.58675e-05
ENSMUSG00000005410	Mcm5	-1.19169	7.60004e-05
ENSMUSG00000016995	Matn4	-1.19117	0.000209745
ENSMUSG00000039145	Camk1d	-1.18963	0.00340958
ENSMUSG00000054728	Phactr1	-1.18852	0.00173492
ENSMUSG00000021831	Ero1l	-1.18327	7.51343e-08
ENSMUSG00000023960	Enpp5	-1.1809	1.51258e-14
ENSMUSG00000038020	Rapgefl1	-1.17951	1.52444e-05
ENSMUSG00000030340	Scnn1a	-1.17888	8.50685e-05
ENSMUSG00000051379	Flrt3	-1.17626	1.99804e-08
ENSMUSG00000044927	H1fx	-1.17219	0.00686844
ENSMUSG00000030124	Lag3	-1.17214	5.6421e-05
ENSMUSG00000045414	1190002N15Rik	-1.16976	1.67291e-05
ENSMUSG00000035131	Brinp3	-1.16679	0.000137074
ENSMUSG00000026196	Bard1	-1.16671	0.00622776
ENSMUSG00000020646	Mboat2	-1.16515	1.06141e-08
ENSMUSG00000028572	Hook1	-1.1649	2.0864e-05
ENSMUSG00000003779	Kif20a	-1.16087	2.6319e-05
ENSMUSG00000002068	Ccne1	-1.15873	0.00614875
ENSMUSG00000032232	Cgnl1	-1.15347	1.24783e-13
ENSMUSG00000022991	Lalba	-1.15141	0.00563421
ENSMUSG00000025001	Hells	-1.1502	5.10373e-06
ENSMUSG00000032815	Fanca	-1.14954	0.00208683
ENSMUSG00000021097	Clmn	-1.14823	6.85028e-08
ENSMUSG00000028832	Stmn1	-1.14181	1.2183e-09
ENSMUSG00000074796	Slc4a11	-1.14135	1.171e-06
ENSMUSG00000028885	Smpdl3b	-1.14038	0.000194001
ENSMUSG00000030560	Ctsc	-1.14026	0.00377763
ENSMUSG00000000861	Bcl11a	-1.13885	1.58481e-08
ENSMUSG00000020614	Fam20a	-1.13788	1.98585e-05
ENSMUSG00000026669	Mcm10	-1.13759	3.04646e-05
ENSMUSG00000021559	Dapk1	-1.13555	9.35481e-11
ENSMUSG00000048327	Ckap2l	-1.13538	0.00692726
ENSMUSG00000026764	Kif5c	-1.13526	0.00647312
ENSMUSG00000050199	Lgr4	-1.13409	4.8371e-11
ENSMUSG00000022096	Hr	-1.13277	1.90304e-10
ENSMUSG00000070639	Lrrc8b	-1.13236	0.00839348
ENSMUSG00000036040	Adamtsl2	-1.13228	0.00179785
ENSMUSG00000053007	Creb5	-1.13161	0.000131847
ENSMUSG00000034906	Ncaph	-1.1286	0.00357175
ENSMUSG00000055254	Ntrk2	-1.12781	5.04813e-14
ENSMUSG00000001517	Foxm1	-1.12775	0.00303398
ENSMUSG00000024590	Lmnb1	-1.12182	0.00163629
ENSMUSG00000025529	Zfp711	-1.11943	0.000207065
ENSMUSG00000024548	Setbp1	-1.11828	2.73576e-06
ENSMUSG00000037664	Cdkn1c	-1.11804	0.00166796
ENSMUSG00000063388	BC023105	-1.10749	9.84593e-07
ENSMUSG00000033237	Arid2	-1.10393	2.39875e-15
ENSMUSG00000001403	Ube2c	-1.10294	0.00242698
ENSMUSG00000022512	Cldn1	-1.10253	2.14759e-05
ENSMUSG00000035944	Ttc38	-1.0959	0.00404283
ENSMUSG00000002870	Mcm2	-1.09561	0.000347435
ENSMUSG00000030257	Srgap3	-1.09353	2.70896e-12
ENSMUSG00000033031	C330027C09Rik	-1.08833	0.00040548
ENSMUSG00000041859	Mcm3	-1.08794	0.000559255
ENSMUSG00000029055	Plch2	-1.08654	2.25613e-05
ENSMUSG00000096954	Gdap10	-1.0857	0.000541579
ENSMUSG00000060063	Alox5ap	-1.08285	0.00872668
ENSMUSG00000039697	Ncoa7	-1.08207	6.34473e-09
ENSMUSG00000003051	Elf3	-1.08175	7.7046e-09
ENSMUSG00000016028	Celsr1	-1.0785	1.50083e-07
ENSMUSG00000029135	Fosl2	-1.0783	1.31335e-05
ENSMUSG00000031431	Tsc22d3	-1.07062	1.55821e-07
ENSMUSG00000024774	Ankrd22	-1.06971	0.00813975
ENSMUSG00000021223	Papln	-1.06664	0.000101516
ENSMUSG00000046410	Kcnk6	-1.06299	0.00956132
ENSMUSG00000006219	Fblim1	-1.06016	8.56098e-12
ENSMUSG00000046314	Stxbp6	-1.05845	1.51524e-12
ENSMUSG00000098132	Rassf10	-1.05619	0.000974148
ENSMUSG00000025203	Scd2	-1.05328	3.01946e-11
ENSMUSG00000036964	Trim17	-1.05297	0.00749417
ENSMUSG00000043439	Epop	-1.05178	1.98118e-06
ENSMUSG00000037370	Enpp1	-1.05065	6.3427e-07
ENSMUSG00000020893	Per1	-1.04792	7.83124e-08
ENSMUSG00000031438	Rnf128	-1.04532	4.52673e-11
ENSMUSG00000034329	Brip1	-1.04404	0.00316388
ENSMUSG00000022197	Pdzd2	-1.04309	1.90541e-05
ENSMUSG00000052557	Gan	-1.04292	0.00447075
ENSMUSG00000074272	Ceacam1	-1.03994	3.75515e-14
ENSMUSG00000006715	Gmnn	-1.03907	0.00102162
ENSMUSG00000034926	Dhcr24	-1.03766	2.44553e-06
ENSMUSG00000055717	Slain1	-1.03515	0.000740272
ENSMUSG00000029687	Ezh2	-1.03395	7.84155e-08
ENSMUSG00000041440	Gk5	-1.02969	4.21426e-05
ENSMUSG00000021262	Evl	-1.02934	0.00764605
ENSMUSG00000028132	Tmem56	-1.02931	0.00128875
ENSMUSG00000032238	Rora	-1.02711	0.000127937
ENSMUSG00000032496	Ltf	-1.02254	0.00125194
ENSMUSG00000027186	Elf5	-1.01634	1.37291e-05
ENSMUSG00000025758	Plk4	-1.01565	0.000726005
ENSMUSG00000022676	Snai2	-1.01393	0.000506859
ENSMUSG00000042686	Jph1	-1.01007	0.0013907
ENSMUSG00000019997	Ctgf	-1.00789	7.57723e-13
ENSMUSG00000031278	Acsl4	-1.00639	3.19919e-07
ENSMUSG00000067780	Pi15	-1.0029	0.000763205
ENSMUSG00000045314	Sowahb	-1.00279	0.000155346
ENSMUSG00000090942	F830016B08Rik	-1.00177	0.00096833
ENSMUSG00000061013	Mkx	-1.00064	0.000179111
ENSMUSG00000030287	Itpr2	-1.00022	3.84922e-06
ENSMUSG00000051817	Sox12	-0.999549	0.00127942
ENSMUSG00000071856	Mcc	-0.997635	2.45697e-07
ENSMUSG00000033713	Foxn3	-0.997468	0.000137586
ENSMUSG00000022114	Spry2	-0.996114	1.00443e-11
ENSMUSG00000004791	Pgf	-0.995734	0.00148082
ENSMUSG00000038252	Ncapd2	-0.993194	2.90232e-07
ENSMUSG00000029910	Mad2l1	-0.989002	0.000292604
ENSMUSG00000023017	Asic1	-0.988015	0.000887402
ENSMUSG00000035840	Lysmd3	-0.986974	3.33533e-08
ENSMUSG00000055884	Fancm	-0.986778	0.00134512
ENSMUSG00000017400	Stac2	-0.986657	3.72859e-19
ENSMUSG00000024143	Rhoq	-0.982726	1.27894e-12
ENSMUSG00000036782	Klhl13	-0.977562	1.1561e-07
ENSMUSG00000039481	Nrtn	-0.974219	0.00825141
ENSMUSG00000038642	Ctss	-0.972689	0.0082607
ENSMUSG00000042190	Cmklr1	-0.972546	3.99445e-05
ENSMUSG00000027692	Tnik	-0.971254	0.00443543
ENSMUSG00000054717	Hmgb2	-0.969456	0.00067223
ENSMUSG00000002107	Celf2	-0.969251	0.00297035
ENSMUSG00000039741	Bahcc1	-0.968695	0.000598818
ENSMUSG00000036109	Mbnl3	-0.968157	0.00115768
ENSMUSG00000002489	Tiam1	-0.966893	1.77619e-08
ENSMUSG00000022864	D16Ertd472e	-0.966231	0.000112185
ENSMUSG00000002297	Dbf4	-0.963879	0.00106998
ENSMUSG00000031596	Slc7a2	-0.962372	8.77777e-05
ENSMUSG00000035133	Arhgap5	-0.961455	1.80907e-06
ENSMUSG00000030091	Nup210	-0.958864	0.00273836
ENSMUSG00000034522	Zfp395	-0.958311	1.60245e-10
ENSMUSG00000028780	Sema3c	-0.958223	0.00323827
ENSMUSG00000035024	Ncapd3	-0.957354	2.83847e-05
ENSMUSG00000037466	Tedc1	-0.956253	0.00375447
ENSMUSG00000020218	Wif1	-0.955224	3.7275e-08
ENSMUSG00000022629	Kif21a	-0.954117	0.00017143
ENSMUSG00000020300	Cpeb4	-0.953357	1.88683e-06
ENSMUSG00000042410	Agps	-0.951389	4.98352e-11
ENSMUSG00000006494	Pdk1	-0.948896	9.70668e-13
ENSMUSG00000033998	Kcnk1	-0.94542	5.6805e-09
ENSMUSG00000069094	Pde7a	-0.944775	0.000185229
ENSMUSG00000025981	Coq10b	-0.944575	6.97205e-08
ENSMUSG00000047604	Frat2	-0.939473	0.000134078
ENSMUSG00000017861	Mybl2	-0.938982	0.0027319
ENSMUSG00000035390	Brsk1	-0.938875	9.82673e-05
ENSMUSG00000024900	Cpt1a	-0.936787	1.72943e-08
ENSMUSG00000025402	Nab2	-0.935888	4.32651e-11
ENSMUSG00000018387	Shroom1	-0.935317	0.00379706
ENSMUSG00000017561	Crlf3	-0.931749	4.45513e-06
ENSMUSG00000020623	Map2k6	-0.931572	0.00718485
ENSMUSG00000033498	Strc	-0.930063	4.13683e-05
ENSMUSG00000034903	Cobll1	-0.929961	1.57129e-14
ENSMUSG00000021196	Pfkp	-0.929651	2.41844e-10
ENSMUSG00000034164	Emid1	-0.928697	1.01703e-12
ENSMUSG00000021678	F2rl1	-0.928303	0.000326567
ENSMUSG00000020134	Peli1	-0.927823	2.29436e-09
ENSMUSG00000039989	Cbx4	-0.927407	1.636e-12
ENSMUSG00000022519	Srl	-0.926185	0.00810165
ENSMUSG00000021550	2210016F16Rik	-0.924353	0.00706397
ENSMUSG00000046805	Mpeg1	-0.922159	0.000149931
ENSMUSG00000079470	Utp14b	-0.921411	0.00173826
ENSMUSG00000039987	Phtf2	-0.920903	8.12841e-07
ENSMUSG00000000594	Gm2a	-0.920611	1.21574e-06
ENSMUSG00000046329	Slc25a23	-0.920157	2.45546e-05
ENSMUSG00000034171	Faah	-0.918927	0.000801432
ENSMUSG00000071176	Arhgef10	-0.918627	2.45021e-06
ENSMUSG00000026147	Col9a1	-0.917286	1.97168e-06
ENSMUSG00000019779	Frk	-0.914731	9.96299e-07
ENSMUSG00000098557	Kctd12	-0.912332	6.10226e-05
ENSMUSG00000045896	Paip2b	-0.912218	2.61315e-11
ENSMUSG00000029366	Dck	-0.910983	0.00130352
ENSMUSG00000027111	Itga6	-0.910407	6.95686e-08
ENSMUSG00000034640	Tiparp	-0.909684	6.90916e-10
ENSMUSG00000041609	Bicdl1	-0.909368	0.00544196
ENSMUSG00000018569	Cldn7	-0.909176	5.66955e-12
ENSMUSG00000049470	Aff4	-0.907938	2.15722e-07
ENSMUSG00000006678	Pola1	-0.907042	0.00120762
ENSMUSG00000060275	Nrg2	-0.905202	8.56353e-08
ENSMUSG00000019992	Mtfr2	-0.904271	0.00304942
ENSMUSG00000046807	Lrrc75b	-0.902967	0.00571546
ENSMUSG00000026384	Ptpn4	-0.898991	0.000139572
ENSMUSG00000027490	E2f1	-0.897824	0.000152865
ENSMUSG00000048732	Klhl11	-0.896398	0.000538316
ENSMUSG00000036908	Unc93b1	-0.894886	0.000144703
ENSMUSG00000026600	Soat1	-0.894828	0.000394576
ENSMUSG00000025026	Add3	-0.893106	6.21791e-07
ENSMUSG00000020189	Osbpl8	-0.89268	1.87181e-05
ENSMUSG00000060002	Chpt1	-0.892159	2.34554e-07
ENSMUSG00000026417	Pigr	-0.891557	4.17511e-07
ENSMUSG00000029330	Cds1	-0.890962	1.28897e-07
ENSMUSG00000063663	Brwd3	-0.890205	0.000211654
ENSMUSG00000019894	Slc6a15	-0.886704	0.0051932
ENSMUSG00000018846	Pank3	-0.886034	6.82667e-07
ENSMUSG00000054662	Ano9	-0.884894	0.000681408
ENSMUSG00000005917	Otx1	-0.884093	1.19566e-05
ENSMUSG00000040998	Npnt	-0.882995	0.000129098
ENSMUSG00000035640	Cbarp	-0.882543	0.000466511
ENSMUSG00000051359	Ncald	-0.881353	4.17156e-05
ENSMUSG00000061527	Krt5	-0.88	5.67124e-09
ENSMUSG00000016552	Foxred2	-0.878437	0.000681683
ENSMUSG00000031112	Stk26	-0.877585	1.40978e-07
ENSMUSG00000042473	Tbc1d8b	-0.877465	1.88902e-07
ENSMUSG00000027957	Slc35a3	-0.8765	8.32085e-08
ENSMUSG00000026110	Mgat4a	-0.875588	3.17257e-11
ENSMUSG00000028207	Asph	-0.87526	1.03748e-05
ENSMUSG00000033454	Zbtb1	-0.874493	6.426e-05
ENSMUSG00000050730	Arhgap42	-0.872916	4.57661e-13
ENSMUSG00000061436	Hipk2	-0.872473	2.0864e-05
ENSMUSG00000012350	Ehf	-0.869701	9.5253e-11
ENSMUSG00000035357	Pdzrn3	-0.869174	1.61051e-08
ENSMUSG00000018774	Cd68	-0.8688	0.000400679
ENSMUSG00000032883	Acsl3	-0.865731	4.23475e-09
ENSMUSG00000035557	Krt17	-0.86539	4.79568e-08
ENSMUSG00000061666	Gdpd1	-0.863458	0.000191989
ENSMUSG00000028392	Bspry	-0.861463	1.03875e-05
ENSMUSG00000018209	Stk4	-0.86145	7.21143e-05
ENSMUSG00000038560	Sp6	-0.860607	0.00443837
ENSMUSG00000004151	Etv1	-0.859284	0.0011256
ENSMUSG00000025025	Mxi1	-0.859233	5.96643e-09
ENSMUSG00000035093	Secisbp2l	-0.856426	1.61485e-06
ENSMUSG00000044149	Nkrf	-0.85543	5.99411e-05
ENSMUSG00000062070	Pgk1	-0.855299	3.65498e-06
ENSMUSG00000041688	Amot	-0.855119	0.000139572
ENSMUSG00000042613	Pbxip1	-0.85475	2.07318e-06
ENSMUSG00000002257	Def6	-0.853478	0.00799086
ENSMUSG00000049551	Fzd9	-0.852969	0.0024236
ENSMUSG00000070780	Rbm47	-0.848279	5.89137e-07
ENSMUSG00000010051	Hyal1	-0.846843	0.00650226
ENSMUSG00000050914	Ankrd37	-0.8463	0.00302184
ENSMUSG00000021553	Slc28a3	-0.845396	5.57443e-05
ENSMUSG00000025665	Rps6ka6	-0.843588	0.000261742
ENSMUSG00000039485	Tspyl4	-0.842674	0.00191821
ENSMUSG00000026107	Nabp1	-0.842592	0.000155346
ENSMUSG00000026064	Ptp4a1	-0.842258	3.52023e-07
ENSMUSG00000001542	Ell2	-0.842186	1.85898e-06
ENSMUSG00000016239	Lonrf3	-0.841842	0.00941365
ENSMUSG00000025736	Jmjd8	-0.841514	1.23698e-05
ENSMUSG00000032358	Fam83b	-0.84138	0.00709526
ENSMUSG00000028565	Nfia	-0.84137	1.26308e-05
ENSMUSG00000040990	Sh3kbp1	-0.839889	0.00630614
ENSMUSG00000027245	Hypk	-0.838462	0.000594618
ENSMUSG00000078919	Dpm1	-0.83815	0.0047271
ENSMUSG00000040875	Osbpl10	-0.837905	3.59393e-05
ENSMUSG00000032449	Slc25a36	-0.837555	2.32262e-09
ENSMUSG00000044501	Zfp758	-0.83701	0.00426718
ENSMUSG00000040152	Thbs1	-0.83637	3.27027e-07
ENSMUSG00000021754	Map3k1	-0.835313	0.000225132
ENSMUSG00000039910	Cited2	-0.834888	1.68643e-10
ENSMUSG00000032890	Rims3	-0.833906	0.000190506
ENSMUSG00000063229	Ldha	-0.833773	2.36227e-11
ENSMUSG00000037826	Ppm1k	-0.833521	0.00202367
ENSMUSG00000044461	Shisa2	-0.83151	0.00173492
ENSMUSG00000057230	Aak1	-0.830071	0.000348912
ENSMUSG00000069769	Msi2	-0.828253	1.44401e-09
ENSMUSG00000094483	Purb	-0.826656	5.3042e-07
ENSMUSG00000034300	Fam53c	-0.826568	5.42899e-07
ENSMUSG00000039704	Lmbrd2	-0.826394	0.00979355
ENSMUSG00000000838	Fmr1	-0.825985	1.39143e-06
ENSMUSG00000057315	Arhgap24	-0.823215	0.00754887
ENSMUSG00000054702	Ap1s3	-0.822867	0.00420764
ENSMUSG00000052812	Atad2b	-0.822066	0.000680651
ENSMUSG00000005148	Klf5	-0.820619	4.75125e-05
ENSMUSG00000047409	Ctdspl	-0.820613	1.30381e-06
ENSMUSG00000032702	Kank1	-0.820108	4.48244e-05
ENSMUSG00000039879	Heca	-0.819633	2.0864e-05
ENSMUSG00000069601	Ank3	-0.819191	0.0068842
ENSMUSG00000000056	Narf	-0.816629	3.41107e-09
ENSMUSG00000027660	Skil	-0.814306	0.00240794
ENSMUSG00000025314	Ptprj	-0.809057	4.42275e-06
ENSMUSG00000049892	Rasd1	-0.806167	0.00375447
ENSMUSG00000045932	Ifit2	-0.805472	7.8968e-05
ENSMUSG00000033054	Npat	-0.80466	0.000569134
ENSMUSG00000035877	Zhx3	-0.804103	0.000582288
ENSMUSG00000043881	Kbtbd7	-0.802669	0.00273329
ENSMUSG00000043019	Edem3	-0.802588	4.93315e-09
ENSMUSG00000032097	Ddx6	-0.802027	1.87413e-08
ENSMUSG00000032846	Zswim6	-0.801642	2.40938e-12
ENSMUSG00000005968	Tuft1	-0.800588	1.72373e-06
ENSMUSG00000033685	Ucp2	-0.800356	1.40625e-05
ENSMUSG00000044303	Cdkn2a	-0.799446	8.3022e-05
ENSMUSG00000042302	Ehbp1	-0.79906	5.88337e-06
ENSMUSG00000078952	Lncenc1	-0.798911	0.000611317
ENSMUSG00000028698	Pik3r3	-0.798712	2.88286e-06
ENSMUSG00000020362	Cnot6	-0.797912	7.62425e-10
ENSMUSG00000033792	Atp7a	-0.797679	0.000114024
ENSMUSG00000032374	Plod2	-0.797565	3.13461e-05
ENSMUSG00000028544	Slc5a9	-0.79748	0.000626441
ENSMUSG00000032501	Trib1	-0.793288	6.7665e-08
ENSMUSG00000089726	Mir17hg	-0.793168	0.0033112
ENSMUSG00000039942	Ptger4	-0.793093	0.00014894
ENSMUSG00000026317	Cln8	-0.791471	0.000414495
ENSMUSG00000046876	Atxn1	-0.791209	0.000796775
ENSMUSG00000024298	Zfp871	-0.790423	0.000824568
ENSMUSG00000030272	Camk1	-0.789586	4.83469e-05
ENSMUSG00000022673	Mcm4	-0.789042	0.00202631
ENSMUSG00000063406	Tmed5	-0.788743	3.82592e-05
ENSMUSG00000024639	Gnaq	-0.788663	1.37151e-07
ENSMUSG00000024968	Rcor2	-0.788403	0.00960026
ENSMUSG00000022797	Tfrc	-0.78813	6.87945e-09
ENSMUSG00000030695	Aldoa	-0.786712	5.47967e-07
ENSMUSG00000032009	Sesn3	-0.784993	0.000147232
ENSMUSG00000026674	Ddr2	-0.782768	4.17608e-07
ENSMUSG00000043391	2510009E07Rik	-0.78238	0.00116618
ENSMUSG00000038679	Trps1	-0.781493	8.48203e-07
ENSMUSG00000000983	Wfdc18	-0.780737	0.000532689
ENSMUSG00000040596	Pogk	-0.779073	6.56989e-08
ENSMUSG00000026014	Raph1	-0.77898	1.93738e-05
ENSMUSG00000061778	Mospd2	-0.777786	1.73043e-06
ENSMUSG00000036473	Tbc1d24	-0.777723	0.000402178
ENSMUSG00000034342	Cbl	-0.777691	0.00138686
ENSMUSG00000028645	Slc2a1	-0.775889	1.59771e-06
ENSMUSG00000029673	Auts2	-0.775098	8.45213e-08
ENSMUSG00000037313	Tacc3	-0.773165	0.00156274
ENSMUSG00000042700	Sipa1l1	-0.772929	9.08025e-10
ENSMUSG00000024781	Lipa	-0.772221	5.01393e-06
ENSMUSG00000029787	Avl9	-0.769771	4.29208e-05
ENSMUSG00000014956	Ppp1cb	-0.769327	1.85488e-08
ENSMUSG00000022533	Atp13a3	-0.767184	1.52961e-12
ENSMUSG00000030055	Rab43	-0.76575	0.00198
ENSMUSG00000027589	Pcmtd2	-0.764184	0.000147232
ENSMUSG00000037857	Nufip2	-0.760838	4.21881e-07
ENSMUSG00000037411	Serpine1	-0.76073	1.62694e-05
ENSMUSG00000037887	Dusp8	-0.758977	1.64394e-08
ENSMUSG00000054252	Fgfr3	-0.758283	0.00293574
ENSMUSG00000071748	Gm14698	-0.7572	0.00273947
ENSMUSG00000040690	Col16a1	-0.756324	0.00165956
ENSMUSG00000075415	Fnbp1	-0.754898	0.00220899
ENSMUSG00000025921	Rdh10	-0.753354	0.000149563
ENSMUSG00000030203	Dusp16	-0.752325	4.43856e-08
ENSMUSG00000090394	4930523C07Rik	-0.75224	4.78443e-06
ENSMUSG00000034488	Edil3	-0.751952	0.00741656
ENSMUSG00000024924	Vldlr	-0.750769	0.000111634
ENSMUSG00000038174	Fam126b	-0.74956	0.00451446
ENSMUSG00000020964	Sel1l	-0.748315	6.34415e-07
ENSMUSG00000038538	Ubn2	-0.745705	0.000570691
ENSMUSG00000030103	Bhlhe40	-0.743886	6.50668e-05
ENSMUSG00000000876	Pxmp4	-0.743615	4.09878e-05
ENSMUSG00000027162	Lin7c	-0.743176	1.89241e-05
ENSMUSG00000053475	Tnfaip6	-0.742842	0.00348025
ENSMUSG00000022139	Mbnl2	-0.739994	1.32158e-06
ENSMUSG00000037868	Egr2	-0.738917	0.000562918
ENSMUSG00000052085	Dock8	-0.737939	0.00126313
ENSMUSG00000032010	Usp2	-0.736371	0.00702754
ENSMUSG00000035236	Scai	-0.735299	0.00014606
ENSMUSG00000020948	Klhl28	-0.734498	0.00449759
ENSMUSG00000075376	Rc3h2	-0.734228	1.97253e-06
ENSMUSG00000051495	Irf2bp2	-0.733103	7.63666e-08
ENSMUSG00000026360	Rgs2	-0.730951	0.00242948
ENSMUSG00000048234	Rnf149	-0.730229	0.000639341
ENSMUSG00000021062	Rab15	-0.729109	0.00485894
ENSMUSG00000034832	Tet3	-0.728177	9.24194e-05
ENSMUSG00000049800	Sertad2	-0.726585	2.08899e-06
ENSMUSG00000030102	Itpr1	-0.726526	4.61771e-05
ENSMUSG00000040943	Tet2	-0.725659	3.19557e-05
ENSMUSG00000024330	Col11a2	-0.725545	0.00495855
ENSMUSG00000031273	Col4a6	-0.724721	0.00652921
ENSMUSG00000035305	Ror1	-0.723864	1.47516e-05
ENSMUSG00000051412	Vamp7	-0.722344	0.00094728
ENSMUSG00000022436	Sh3bp1	-0.721452	0.000208352
ENSMUSG00000055240	Zfp101	-0.721002	0.00377482
ENSMUSG00000030275	Etnk1	-0.719846	7.1371e-06
ENSMUSG00000035329	Fbxo33	-0.719739	3.56696e-05
ENSMUSG00000094870	Zfp131	-0.719726	2.79409e-10
ENSMUSG00000020423	Btg2	-0.719611	0.00147492
ENSMUSG00000028403	Zdhhc21	-0.719409	1.40625e-05
ENSMUSG00000032349	Elovl5	-0.71817	0.000779913
ENSMUSG00000030201	Lrp6	-0.717318	0.000143587
ENSMUSG00000006262	Mob1b	-0.714465	4.75036e-06
ENSMUSG00000023845	Lnpep	-0.713176	0.000950001
ENSMUSG00000037315	Jade3	-0.712957	0.00116014
ENSMUSG00000041058	Wwp1	-0.712723	8.02865e-05
ENSMUSG00000042507	Elmsan1	-0.712465	5.62663e-05
ENSMUSG00000075470	Alg10b	-0.710991	0.00037903
ENSMUSG00000057551	Zfp317	-0.710793	0.00538488
ENSMUSG00000036698	Ago2	-0.710245	6.01989e-08
ENSMUSG00000022200	Golph3	-0.709925	1.88902e-07
ENSMUSG00000046062	Ppp1r15b	-0.70881	3.50966e-06
ENSMUSG00000018476	Kdm6b	-0.708652	4.13059e-05
ENSMUSG00000043252	Tmem64	-0.708146	4.09273e-05
ENSMUSG00000026185	Igfbp5	-0.707129	1.90677e-05
ENSMUSG00000059555	Tor4a	-0.706737	0.00312295
ENSMUSG00000024277	Mapre2	-0.705747	2.77339e-05
ENSMUSG00000048546	Tob2	-0.705406	6.66111e-05
ENSMUSG00000031488	Rab11fip1	-0.704703	0.00170564
ENSMUSG00000032261	Sh3bgrl2	-0.704478	3.21994e-07
ENSMUSG00000038459	Abhd17c	-0.704082	0.00101411
ENSMUSG00000025612	Bach1	-0.703503	1.13453e-05
ENSMUSG00000018362	Kpna2	-0.703301	6.59852e-05
ENSMUSG00000022292	Rrm2b	-0.70193	0.000650174
ENSMUSG00000032724	Abtb2	-0.701861	1.29079e-07
ENSMUSG00000056394	Lig1	-0.701106	0.00909814
ENSMUSG00000021589	Rhobtb3	-0.70093	0.00161231
ENSMUSG00000032437	Stt3b	-0.700358	1.13858e-10
ENSMUSG00000021054	Sgpp1	-0.69692	0.000118639
ENSMUSG00000059811	Atl2	-0.696312	1.16427e-08
ENSMUSG00000015766	Eps8	-0.695312	5.57519e-08
ENSMUSG00000031608	Galnt7	-0.695037	0.000275959
ENSMUSG00000061136	Prpf40a	-0.694974	1.23491e-11
ENSMUSG00000024544	Ldlrad4	-0.694343	7.1233e-06
ENSMUSG00000054027	Nt5dc3	-0.694236	1.8493e-06
ENSMUSG00000060227	Casc4	-0.693691	0.000818696
ENSMUSG00000043885	Slc36a4	-0.692246	0.00277351
ENSMUSG00000048118	Arid4a	-0.691065	0.000132911
ENSMUSG00000035898	Uba6	-0.689617	0.000327343
ENSMUSG00000019960	Dusp6	-0.689035	4.91553e-06
ENSMUSG00000034297	Med13	-0.68659	0.00265602
ENSMUSG00000032253	Phip	-0.686323	8.60318e-05
ENSMUSG00000003849	Nqo1	-0.686207	0.00189882
ENSMUSG00000047648	Fbxo30	-0.686186	7.4375e-06
ENSMUSG00000015189	Casd1	-0.685089	0.00010265
ENSMUSG00000020463	Ppp4r3b	-0.68441	3.70083e-06
ENSMUSG00000039841	Zfp800	-0.68362	0.00234187
ENSMUSG00000041961	Znrf3	-0.683202	0.000800185
ENSMUSG00000038250	Usp38	-0.682321	5.06855e-08
ENSMUSG00000046785	Epm2aip1	-0.681903	6.19951e-05
ENSMUSG00000052271	Bhlha15	-0.681457	0.00336214
ENSMUSG00000028434	Epb41l4b	-0.680857	3.97034e-08
ENSMUSG00000034610	Zcchc11	-0.680464	0.000499032
ENSMUSG00000035064	Eef2k	-0.678226	0.00171345
ENSMUSG00000040253	Gbp7	-0.678058	0.00447568
ENSMUSG00000020029	Nudt4	-0.676777	0.000224849
ENSMUSG00000021277	Traf3	-0.676314	4.29608e-05
ENSMUSG00000054942	Miga1	-0.675576	0.000575357
ENSMUSG00000075595	Zfp652	-0.675487	0.000191476
ENSMUSG00000029580	Actb	-0.675443	3.48925e-05
ENSMUSG00000042742	Bmt2	-0.673498	0.00704882
ENSMUSG00000023456	Tpi1	-0.673427	1.82837e-09
ENSMUSG00000033964	Zbtb41	-0.673037	0.000242291
ENSMUSG00000054321	Taf4b	-0.671787	2.47967e-05
ENSMUSG00000026958	Dpp7	-0.671412	0.00148253
ENSMUSG00000019916	P4ha1	-0.671216	4.53143e-05
ENSMUSG00000030779	Rbbp6	-0.671213	4.36319e-06
ENSMUSG00000041895	Wipi1	-0.671203	7.55384e-05
ENSMUSG00000002222	Rmnd5a	-0.671195	9.07763e-08
ENSMUSG00000037795	N4bp2	-0.67086	0.000875942
ENSMUSG00000002413	Braf	-0.668871	0.000772828
ENSMUSG00000021662	Arhgef28	-0.66859	1.9182e-06
ENSMUSG00000047749	Zc3hav1l	-0.667631	0.00173737
ENSMUSG00000015882	Lcorl	-0.667294	0.00726344
ENSMUSG00000059890	Ube4a	-0.66685	4.84659e-06
ENSMUSG00000020721	Helz	-0.665874	6.51558e-05
ENSMUSG00000026103	Gls	-0.664513	2.19699e-07
ENSMUSG00000078651	Aoc2	-0.663371	0.00847699
ENSMUSG00000020777	Acox1	-0.661285	1.21767e-09
ENSMUSG00000034636	Zyg11b	-0.66123	7.24252e-06
ENSMUSG00000053580	Tanc2	-0.660932	0.00396971
ENSMUSG00000035992	Fnip1	-0.660415	0.000237956
ENSMUSG00000036282	Naa30	-0.660257	0.00129741
ENSMUSG00000021466	Ptch1	-0.660076	0.000435966
ENSMUSG00000027533	Fabp5	-0.65982	0.000381629
ENSMUSG00000015605	Srf	-0.659362	9.8867e-07
ENSMUSG00000026827	Gpd2	-0.657331	2.52249e-06
ENSMUSG00000063428	Ddo	-0.656034	0.00605285
ENSMUSG00000067235	H2-Q10	-0.656003	0.000961369
ENSMUSG00000037896	Rcor1	-0.65452	0.000209096
ENSMUSG00000037458	Azin1	-0.653176	3.20544e-06
ENSMUSG00000028195	Cyr61	-0.650862	1.02384e-11
ENSMUSG00000027332	Ivd	-0.6507	4.29608e-05
ENSMUSG00000041417	Pik3r1	-0.649571	5.43992e-07
ENSMUSG00000040524	Zfp609	-0.649512	9.33672e-06
ENSMUSG00000028630	Dyrk2	-0.649474	0.000447814
ENSMUSG00000035161	Ints6	-0.648925	0.000347591
ENSMUSG00000018796	Acsl1	-0.648522	0.000707202
ENSMUSG00000038894	Irs2	-0.647373	0.00124273
ENSMUSG00000029823	Luc7l2	-0.646663	4.92088e-09
ENSMUSG00000001627	Ifrd1	-0.645733	1.31435e-06
ENSMUSG00000024427	Spry4	-0.64461	0.00189813
ENSMUSG00000069793	Slfn9	-0.644189	0.00519367
ENSMUSG00000042225	Ammecr1	-0.643815	0.00317142
ENSMUSG00000025571	Tnrc6c	-0.6436	6.87857e-05
ENSMUSG00000058571	Gpc6	-0.643165	0.00129841
ENSMUSG00000042599	Kdm7a	-0.642744	0.00209291
ENSMUSG00000028842	Ago3	-0.641782	0.00421481
ENSMUSG00000042035	Igsf3	-0.641357	0.000274848
ENSMUSG00000011752	Pgam1	-0.640117	2.21524e-06
ENSMUSG00000018849	Wwc1	-0.639945	2.23106e-07
ENSMUSG00000029032	Arhgef16	-0.639835	0.000122557
ENSMUSG00000033184	Tmed7	-0.638843	6.51558e-05
ENSMUSG00000020661	Dnmt3a	-0.637899	0.00010985
ENSMUSG00000040520	Manea	-0.637717	0.000326567
ENSMUSG00000035637	Grhpr	-0.63714	0.00132326
ENSMUSG00000022843	Clcn2	-0.635935	0.000556518
ENSMUSG00000035021	Baz1a	-0.635835	1.43865e-05
ENSMUSG00000014932	Yes1	-0.634352	0.00277517
ENSMUSG00000026977	March7	-0.63392	3.31344e-07
ENSMUSG00000066324	Impad1	-0.633355	0.000207266
ENSMUSG00000087370	Tmem170b	-0.633221	0.00840527
ENSMUSG00000031529	Tnks	-0.631593	0.000283105
ENSMUSG00000031666	Rbl2	-0.630871	0.00778476
ENSMUSG00000059474	Mbtd1	-0.630506	5.0037e-05
ENSMUSG00000032640	Chsy1	-0.629733	0.00212115
ENSMUSG00000020782	Llgl2	-0.628926	8.43006e-07
ENSMUSG00000009470	Tnpo1	-0.628746	1.59662e-05
ENSMUSG00000022601	Zbtb11	-0.628313	5.32623e-06
ENSMUSG00000022510	Trp63	-0.627868	3.62984e-06
ENSMUSG00000027176	Cstf3	-0.62777	0.000386329
ENSMUSG00000020190	Mknk2	-0.626692	0.00547911
ENSMUSG00000003865	Gys1	-0.626482	0.000569973
ENSMUSG00000032555	Topbp1	-0.625894	0.0058298
ENSMUSG00000007613	Tgfbr1	-0.625635	0.000835094
ENSMUSG00000021969	Zdhhc20	-0.624963	0.000657866
ENSMUSG00000020277	Pfkl	-0.624912	5.25105e-06
ENSMUSG00000031381	Piga	-0.624904	0.00341786
ENSMUSG00000017548	Suz12	-0.624489	5.90424e-05
ENSMUSG00000025792	Slc25a10	-0.624281	0.000190506
ENSMUSG00000022265	Ank	-0.624081	9.07914e-06
ENSMUSG00000040455	Usp45	-0.623217	0.00322964
ENSMUSG00000022687	Boc	-0.623147	1.45984e-06
ENSMUSG00000028228	Cpne3	-0.622779	1.02171e-06
ENSMUSG00000015002	Efr3a	-0.622436	3.47207e-07
ENSMUSG00000040270	Bach2	-0.617552	0.00627133
ENSMUSG00000024486	Hbegf	-0.616455	4.92296e-05
ENSMUSG00000021238	Aldh6a1	-0.61384	0.00115011
ENSMUSG00000033526	Ppip5k1	-0.613326	0.000283105
ENSMUSG00000043003	Rasef	-0.612499	0.00717854
ENSMUSG00000019818	Cd164	-0.610922	2.34554e-07
ENSMUSG00000020612	Prkar1a	-0.610457	2.48017e-06
ENSMUSG00000085334	Gm12940	-0.610106	0.00528006
ENSMUSG00000049323	Smcr8	-0.610003	0.00122421
ENSMUSG00000070544	Top1	-0.609896	2.60659e-06
ENSMUSG00000038807	Rap1gap2	-0.609725	9.59586e-08
ENSMUSG00000039701	Usp53	-0.609481	0.00139153
ENSMUSG00000045319	Proser2	-0.60934	0.00794099
ENSMUSG00000020634	Ubxn2a	-0.608891	0.000264994
ENSMUSG00000034723	Tmx4	-0.607454	0.000621445
ENSMUSG00000030180	Kdm5a	-0.607162	0.00101476
ENSMUSG00000021733	Slc4a7	-0.606056	0.00254022
ENSMUSG00000045103	Dmd	-0.605569	0.000275872
ENSMUSG00000056579	Tug1	-0.604985	1.1328e-06
ENSMUSG00000049516	Spty2d1	-0.604791	0.000734632
ENSMUSG00000027187	Cat	-0.604065	4.62065e-06
ENSMUSG00000031762	Mt2	-0.603268	0.00872159
ENSMUSG00000033295	Ptprf	-0.603134	0.00063756
ENSMUSG00000032411	Tfdp2	-0.602631	0.000282826
ENSMUSG00000024054	Smchd1	-0.600789	0.00343142
ENSMUSG00000024742	Fen1	-0.600617	0.00294048
ENSMUSG00000029992	Gfpt1	-0.600457	1.20544e-05
ENSMUSG00000062627	Mysm1	-0.600447	0.00496132
ENSMUSG00000034647	Ankrd12	-0.599886	0.00636197
ENSMUSG00000023074	Mospd1	-0.599373	0.00269414
ENSMUSG00000004642	Slbp	-0.599299	0.000102261
ENSMUSG00000022602	Arc	-0.599224	0.00109348
ENSMUSG00000032012	Nectin1	-0.598273	0.00768303
ENSMUSG00000037475	Thoc2	-0.5973	0.000290081
ENSMUSG00000030104	Edem1	-0.597126	4.3682e-05
ENSMUSG00000029238	Clock	-0.597005	0.000387681
ENSMUSG00000039159	Ube2h	-0.595569	1.01887e-05
ENSMUSG00000025059	Gk	-0.594547	0.00113585
ENSMUSG00000056268	Dennd1b	-0.59409	0.0014536
ENSMUSG00000029265	Dr1	-0.593697	0.00120812
ENSMUSG00000022641	Bbx	-0.593488	0.000997843
ENSMUSG00000032727	Mier3	-0.592717	0.00145228
ENSMUSG00000025268	Maged2	-0.590737	0.00241373
ENSMUSG00000026158	Ogfrl1	-0.590711	0.00381771
ENSMUSG00000049969	Plekhf2	-0.589919	0.000467427
ENSMUSG00000041935	AW549877	-0.589623	0.000239004
ENSMUSG00000061411	Nol4l	-0.589614	0.0014516
ENSMUSG00000048047	Zbtb33	-0.589566	0.000130054
ENSMUSG00000086968	4933431E20Rik	-0.589031	0.00404283
ENSMUSG00000069114	Zbtb10	-0.588786	0.00109348
ENSMUSG00000024294	Mib1	-0.588778	7.2362e-06
ENSMUSG00000026896	Ifih1	-0.588484	9.97389e-06
ENSMUSG00000021282	Eif5	-0.587777	7.84155e-08
ENSMUSG00000035274	Tpbg	-0.587748	0.00198
ENSMUSG00000028382	Ptbp3	-0.587504	0.000737797
ENSMUSG00000039219	Arid4b	-0.586952	1.67315e-06
ENSMUSG00000022812	Gsk3b	-0.586881	1.47404e-05
ENSMUSG00000006169	Clint1	-0.585097	8.74675e-06
ENSMUSG00000030452	Nipa2	-0.58357	0.000322419
ENSMUSG00000031333	Abcb7	-0.583444	0.00012691
ENSMUSG00000045962	Wnk1	-0.582566	1.89861e-05
ENSMUSG00000038205	Prkab2	-0.58242	0.00296466
ENSMUSG00000003038	Hmgn2	-0.581904	0.00355748
ENSMUSG00000029267	Mtf2	-0.581487	0.000272648
ENSMUSG00000032047	Acat1	-0.579287	0.000207082
ENSMUSG00000017132	Cyth1	-0.579223	0.000162603
ENSMUSG00000026960	Arl6ip6	-0.579	0.00206383
ENSMUSG00000045205	Dpy19l4	-0.578944	0.00138259
ENSMUSG00000047141	Zfp654	-0.578165	0.00196961
ENSMUSG00000021264	Yy1	-0.578077	7.30905e-05
ENSMUSG00000042323	Pbrm1	-0.577083	0.000241966
ENSMUSG00000003644	Rps6ka1	-0.575732	0.00829363
ENSMUSG00000037703	Lzts3	-0.575686	0.00686471
ENSMUSG00000020439	Smtn	-0.574505	1.04295e-07
ENSMUSG00000047045	Tmem164	-0.574001	9.42044e-07
ENSMUSG00000032216	Nedd4	-0.573748	4.79496e-07
ENSMUSG00000026484	Rnf2	-0.572721	0.000630888
ENSMUSG00000037400	Atp11b	-0.57156	1.27995e-05
ENSMUSG00000062949	Atp11c	-0.571553	0.00182544
ENSMUSG00000019970	Sgk1	-0.57124	5.51379e-09
ENSMUSG00000041328	Pcf11	-0.570324	0.00226965
ENSMUSG00000041180	Hectd2	-0.569819	0.00233737
ENSMUSG00000037876	Jmjd1c	-0.568428	0.000402178
ENSMUSG00000017639	Rab11fip4	-0.567876	0.00250785
ENSMUSG00000036667	Tcaf1	-0.567849	4.64882e-05
ENSMUSG00000036461	Elf1	-0.56778	0.000226822
ENSMUSG00000031715	Smarca5	-0.567708	1.36393e-05
ENSMUSG00000024665	Fads2	-0.567684	0.000197405
ENSMUSG00000025626	Phf6	-0.567502	0.00428733
ENSMUSG00000032624	Eml4	-0.567484	0.00196961
ENSMUSG00000022863	Btg3	-0.567003	0.00300218
ENSMUSG00000027177	Hipk3	-0.566814	0.00083734
ENSMUSG00000004099	Dnmt1	-0.565708	0.00541746
ENSMUSG00000036197	Gxylt1	-0.565637	0.00260723
ENSMUSG00000039630	Hnrnpu	-0.565592	2.97083e-06
ENSMUSG00000024290	Rock1	-0.565576	0.000538927
ENSMUSG00000025862	Stag2	-0.563453	5.5555e-05
ENSMUSG00000021709	Erbin	-0.563306	0.000108982
ENSMUSG00000018481	Appbp2	-0.562115	0.000145677
ENSMUSG00000014498	Ankrd52	-0.561818	2.48528e-07
ENSMUSG00000020594	Pum2	-0.561562	5.43905e-06
ENSMUSG00000020611	Gna13	-0.561146	0.000966265
ENSMUSG00000053477	Tcf4	-0.560641	3.89614e-05
ENSMUSG00000038518	Jarid2	-0.560431	0.0060625
ENSMUSG00000021690	Jmy	-0.560048	0.000994626
ENSMUSG00000049658	Bdp1	-0.558958	0.00300218
ENSMUSG00000035293	G2e3	-0.558183	0.000299378
ENSMUSG00000047735	Samd9l	-0.557191	1.6347e-06
ENSMUSG00000052459	Atp6v1a	-0.556697	1.62036e-06
ENSMUSG00000035696	Rnf38	-0.556067	3.35291e-05
ENSMUSG00000026355	Mcm6	-0.555324	0.00444757
ENSMUSG00000073434	Wdr90	-0.555218	0.00521215
ENSMUSG00000031232	Magt1	-0.555177	0.0010481
ENSMUSG00000040481	Bptf	-0.554036	0.00194693
ENSMUSG00000070923	Klhl9	-0.553486	5.88888e-06
ENSMUSG00000037921	Ddx60	-0.552654	9.98024e-05
ENSMUSG00000029826	Zc3hav1	-0.551652	0.0081343
ENSMUSG00000028496	Mllt3	-0.551516	0.0094621
ENSMUSG00000050627	Gpd1l	-0.551112	0.000768867
ENSMUSG00000031601	Cnot7	-0.551018	2.47953e-06
ENSMUSG00000038766	Gabpb2	-0.549089	0.000618682
ENSMUSG00000027808	Serp1	-0.548928	4.13059e-05
ENSMUSG00000042390	Gatad2b	-0.548685	0.00316388
ENSMUSG00000033364	Usp37	-0.548579	0.00640413
ENSMUSG00000028820	Sfpq	-0.547909	9.13327e-06
ENSMUSG00000042622	Maff	-0.547773	0.0040315
ENSMUSG00000020962	Gtf2a1	-0.547542	0.00391114
ENSMUSG00000036391	Sec24a	-0.546493	5.06298e-05
ENSMUSG00000033596	Rfwd3	-0.545504	3.01911e-05
ENSMUSG00000042460	C1galt1	-0.545443	0.00913332
ENSMUSG00000030759	Far1	-0.545269	1.61256e-05
ENSMUSG00000022353	Mtss1	-0.54485	0.000276622
ENSMUSG00000040167	Ikzf5	-0.544647	0.00367488
ENSMUSG00000022562	Oplah	-0.544384	0.00854786
ENSMUSG00000004319	Clcn3	-0.54418	0.00215897
ENSMUSG00000032293	Ireb2	-0.543879	1.68639e-05
ENSMUSG00000017291	Taok1	-0.543823	0.0094621
ENSMUSG00000025326	Ube3a	-0.543293	0.000955189
ENSMUSG00000029202	Pds5a	-0.542781	0.000515944
ENSMUSG00000056537	Rlim	-0.54274	0.00307268
ENSMUSG00000064127	Med14	-0.542583	0.0012256
ENSMUSG00000026781	Acbd5	-0.542391	0.000369239
ENSMUSG00000020859	Spag9	-0.542306	0.000224984
ENSMUSG00000047213	Ythdf3	-0.541189	1.10244e-05
ENSMUSG00000028484	Psip1	-0.541059	0.000916787
ENSMUSG00000011960	Ccnt1	-0.540961	0.0043354
ENSMUSG00000034586	Hid1	-0.540655	1.10371e-05
ENSMUSG00000074994	Qser1	-0.540529	0.00347961
ENSMUSG00000052656	Rnf103	-0.540231	7.981e-05
ENSMUSG00000031010	Usp9x	-0.538953	0.00726345
ENSMUSG00000026980	Ly75	-0.538146	0.00181737
ENSMUSG00000035208	Slfn8	-0.537648	0.00130725
ENSMUSG00000074480	Mex3a	-0.53727	0.000144408
ENSMUSG00000037808	Fam76b	-0.537208	0.000488168
ENSMUSG00000029840	Mtpn	-0.536865	0.000174514
ENSMUSG00000035847	Ids	-0.535868	0.00277492
ENSMUSG00000074102	Rbm15b	-0.534765	0.000134604
ENSMUSG00000072568	Fam84b	-0.534365	0.00993622
ENSMUSG00000023025	Larp4	-0.534242	0.00606328
ENSMUSG00000042364	Snx18	-0.533097	0.00434955
ENSMUSG00000026471	Mr1	-0.532723	0.00954652
ENSMUSG00000021109	Hif1a	-0.531436	0.00405927
ENSMUSG00000034998	Foxn2	-0.531297	0.000234414
ENSMUSG00000020280	Pus10	-0.531204	0.00162622
ENSMUSG00000028522	Mier1	-0.531015	0.000508302
ENSMUSG00000032410	Xrn1	-0.530939	0.00289738
ENSMUSG00000020483	Dynll2	-0.530543	6.41703e-07
ENSMUSG00000037286	Stag1	-0.530245	0.000616817
ENSMUSG00000021413	Prpf4b	-0.529902	2.90632e-07
ENSMUSG00000050965	Prkca	-0.529226	0.000155781
ENSMUSG00000029512	Ulk1	-0.529039	5.77083e-06
ENSMUSG00000018068	Ints2	-0.528831	0.000800434
ENSMUSG00000022507	1810013L24Rik	-0.528412	0.00010404
ENSMUSG00000023026	Dip2b	-0.528244	0.00357446
ENSMUSG00000041408	Wapl	-0.527706	7.0379e-06
ENSMUSG00000066026	Dhrs3	-0.526736	0.00375609
ENSMUSG00000032228	Tcf12	-0.526466	9.71562e-05
ENSMUSG00000043279	Trim56	-0.525952	0.00249378
ENSMUSG00000053470	Kdm3a	-0.524279	5.39408e-05
ENSMUSG00000014905	Dnajb9	-0.524179	0.000197405
ENSMUSG00000045210	Vcpip1	-0.523984	0.00108109
ENSMUSG00000062825	Actg1	-0.523515	0.000176898
ENSMUSG00000023009	Nckap5l	-0.523503	5.73054e-05
ENSMUSG00000062014	Gmfb	-0.52298	2.20668e-05
ENSMUSG00000062901	Klhl24	-0.522386	0.00245545
ENSMUSG00000055737	Ghr	-0.521409	0.000247875
ENSMUSG00000000275	Trim25	-0.521183	1.76676e-05
ENSMUSG00000034574	Daam1	-0.520629	0.00152325
ENSMUSG00000035232	Pdk3	-0.520595	0.00205138
ENSMUSG00000019961	Tmpo	-0.519378	0.00943866
ENSMUSG00000020128	Vps54	-0.51828	0.000147232
ENSMUSG00000009575	Cbx5	-0.518178	0.000533525
ENSMUSG00000018501	Ncor1	-0.517188	4.13851e-05
ENSMUSG00000023150	Ivns1abp	-0.517181	5.77083e-06
ENSMUSG00000048249	Crebrf	-0.515542	0.00583533
ENSMUSG00000017677	Wsb1	-0.515447	3.94718e-05
ENSMUSG00000022141	Nipbl	-0.514934	0.00323011
ENSMUSG00000024122	Pdpk1	-0.514868	0.00081119
ENSMUSG00000038080	Kdm1b	-0.514275	0.00864791
ENSMUSG00000046027	Stard5	-0.513822	0.000801349
ENSMUSG00000019907	Ppp1r12a	-0.51337	0.00234283
ENSMUSG00000027366	Sppl2a	-0.513285	1.3897e-05
ENSMUSG00000008575	Nfib	-0.513119	0.00632473
ENSMUSG00000042046	Dstyk	-0.511149	0.0006559
ENSMUSG00000027104	Atf2	-0.51099	0.002404
ENSMUSG00000030557	Mef2a	-0.510972	0.0083644
ENSMUSG00000007812	Zfp655	-0.510933	0.0040317
ENSMUSG00000024431	Nr3c1	-0.510121	0.00252519
ENSMUSG00000032525	Nktr	-0.509857	0.000135469
ENSMUSG00000040728	Esrp1	-0.509803	5.41011e-05
ENSMUSG00000025860	Xiap	-0.50849	0.0060964
ENSMUSG00000015755	Tab2	-0.508186	0.00057463
ENSMUSG00000032418	Me1	-0.50786	0.000938925
ENSMUSG00000037652	Phc3	-0.507591	0.00319277
ENSMUSG00000062078	Qk	-0.507135	0.00303434
ENSMUSG00000031229	Atrx	-0.506617	0.000249785
ENSMUSG00000066150	Slc31a1	-0.505825	0.000538316
ENSMUSG00000021377	Dek	-0.505778	0.00586003
ENSMUSG00000021112	Mpp5	-0.505715	0.00478594
ENSMUSG00000028383	Hsdl2	-0.505679	0.00761669
ENSMUSG00000020737	Jpt1	-0.505528	3.1894e-05
ENSMUSG00000037643	Prkci	-0.505156	0.000829229
ENSMUSG00000032902	Slc16a1	-0.50451	0.000358997
ENSMUSG00000061273	Mmgt1	-0.503888	0.00543233
ENSMUSG00000041037	Irgq	-0.502595	0.000319752
ENSMUSG00000000078	Klf6	-0.502404	4.99731e-05
ENSMUSG00000020590	Snx13	-0.502133	0.00753349
ENSMUSG00000010067	Rassf1	-0.502129	0.00183096
ENSMUSG00000021665	Hexb	-0.500902	0.00312221
ENSMUSG00000044098	Rsbn1	-0.500891	0.00770012
ENSMUSG00000020063	Sirt1	-0.500882	0.00473315
ENSMUSG00000013275	Slc41a1	-0.500513	8.70913e-05
ENSMUSG00000033411	Ctdspl2	-0.500185	0.00858285
ENSMUSG00000020954	Strn3	-0.499148	3.82569e-05
ENSMUSG00000063524	Eno1	-0.498773	0.00141876
ENSMUSG00000096210	H1f0	-0.498078	0.000280651
ENSMUSG00000044066	Cep68	-0.497775	0.00341991
ENSMUSG00000020917	Acly	-0.497522	4.13683e-05
ENSMUSG00000024614	Tmx3	-0.496618	0.000386715
ENSMUSG00000054604	Cggbp1	-0.496318	0.000400261
ENSMUSG00000003309	Ap1m2	-0.495722	0.00499714
ENSMUSG00000030199	Etv6	-0.494903	5.48714e-05
ENSMUSG00000079108	Srp54b	-0.494538	0.00137023
ENSMUSG00000022205	Sub1	-0.494521	0.00606684
ENSMUSG00000061665	Cd2ap	-0.494218	0.000169286
ENSMUSG00000027087	Itgav	-0.49413	1.0378e-06
ENSMUSG00000036591	Arhgap21	-0.49413	0.000147087
ENSMUSG00000027580	Helz2	-0.493564	0.000566754
ENSMUSG00000020160	Meis1	-0.493191	0.00990371
ENSMUSG00000030315	Vgll4	-0.493176	0.0023516
ENSMUSG00000019189	Rnf145	-0.493018	0.000262538
ENSMUSG00000024042	Sik1	-0.492578	0.000413807
ENSMUSG00000020572	Nampt	-0.490484	0.000139572
ENSMUSG00000019132	BC005537	-0.490292	4.80984e-05
ENSMUSG00000021775	Nr1d2	-0.490039	0.00415089
ENSMUSG00000042790	Rnf214	-0.489999	0.0052205
ENSMUSG00000078671	Chd2	-0.489461	0.000423445
ENSMUSG00000027288	Zfp106	-0.489238	0.00086191
ENSMUSG00000017144	Rnd3	-0.488943	0.000532689
ENSMUSG00000044340	Phlpp1	-0.488134	0.00262215
ENSMUSG00000031246	Sh3bgrl	-0.487385	0.00284789
ENSMUSG00000027459	Fam110a	-0.487263	0.00289869
ENSMUSG00000007850	Hnrnph1	-0.486904	8.20302e-09
ENSMUSG00000042444	Mindy2	-0.486718	0.000943773
ENSMUSG00000027828	Ssr3	-0.486406	2.03963e-07
ENSMUSG00000029772	Ahcyl2	-0.486391	0.00383401
ENSMUSG00000040297	Suco	-0.486382	0.000733746
ENSMUSG00000084128	Esrp2	-0.486157	0.00354736
ENSMUSG00000038844	Kif16b	-0.485436	0.00545603
ENSMUSG00000072872	Rybp	-0.485214	0.00233273
ENSMUSG00000042207	Kdm5b	-0.48514	0.000524515
ENSMUSG00000003382	Etv3	-0.484508	0.00741458
ENSMUSG00000085438	1700020I14Rik	-0.483735	0.00246346
ENSMUSG00000026819	Slc25a25	-0.483704	0.00193329
ENSMUSG00000024420	Zfp521	-0.48299	0.00279601
ENSMUSG00000044786	Zfp36	-0.482542	0.000415461
ENSMUSG00000054823	Nsd3	-0.481835	0.000602555
ENSMUSG00000032601	Prkar2a	-0.481751	0.00032892
ENSMUSG00000007817	Zmiz1	-0.48158	0.00268963
ENSMUSG00000035725	Prkx	-0.481549	0.00436423
ENSMUSG00000032481	Smarcc1	-0.481495	4.52684e-05
ENSMUSG00000033953	Ppp3r1	-0.48127	0.00749497
ENSMUSG00000026775	Yme1l1	-0.480771	0.000115511
ENSMUSG00000000340	Dbt	-0.480666	0.00428448
ENSMUSG00000073700	Klhl21	-0.480643	0.000367515
ENSMUSG00000048878	Hexim1	-0.480022	0.000942976
ENSMUSG00000047036	Zfp445	-0.479979	0.00664154
ENSMUSG00000031626	Sorbs2	-0.479927	0.000191989
ENSMUSG00000048701	Ccdc6	-0.479312	2.39087e-06
ENSMUSG00000030934	Oat	-0.479173	0.000219814
ENSMUSG00000035726	Supt16	-0.478821	0.00309667
ENSMUSG00000066595	Flvcr1	-0.478386	0.0019393
ENSMUSG00000027506	Tpd52	-0.478315	0.000367667
ENSMUSG00000024811	Tnks2	-0.47778	0.00091055
ENSMUSG00000021972	Hmbox1	-0.47677	0.00630521
ENSMUSG00000027630	Tbl1xr1	-0.476757	0.00903126
ENSMUSG00000045095	Magi1	-0.476212	0.00333227
ENSMUSG00000032515	Csrnp1	-0.476047	0.00474559
ENSMUSG00000030660	Pik3c2a	-0.47476	0.00617447
ENSMUSG00000033909	Usp36	-0.474242	0.00204781
ENSMUSG00000038658	Ric1	-0.474072	0.00953051
ENSMUSG00000024472	Dcp2	-0.473916	0.00268963
ENSMUSG00000046079	Lrrc8d	-0.473501	0.000383881
ENSMUSG00000028436	Dcaf12	-0.47347	0.00292203
ENSMUSG00000020263	Appl2	-0.472496	0.00139754
ENSMUSG00000025531	Chm	-0.471684	0.00681291
ENSMUSG00000047881	Rell1	-0.471102	0.00741079
ENSMUSG00000032369	Plscr1	-0.47109	0.00312295
ENSMUSG00000036167	Pphln1	-0.470859	0.00232634
ENSMUSG00000031299	Pdha1	-0.470435	2.62006e-05
ENSMUSG00000020894	Vamp2	-0.470199	0.00143739
ENSMUSG00000019256	Ahr	-0.47012	0.00109131
ENSMUSG00000041439	Mfsd6	-0.469875	0.00304002
ENSMUSG00000006740	Kif5b	-0.469788	0.00139055
ENSMUSG00000061455	Stx17	-0.467983	0.00295619
ENSMUSG00000025153	Fasn	-0.467927	0.00444926
ENSMUSG00000059005	Hnrnpa3	-0.467795	0.000116226
ENSMUSG00000031987	Egln1	-0.467533	0.000939367
ENSMUSG00000037447	Arid5a	-0.466849	0.00177192
ENSMUSG00000042650	Alkbh5	-0.466233	0.000125953
ENSMUSG00000040021	Lats1	-0.466073	0.00266544
ENSMUSG00000020715	Ern1	-0.465229	0.000791674
ENSMUSG00000037013	Ss18	-0.464475	8.91722e-05
ENSMUSG00000026667	Uhmk1	-0.464184	0.000697333
ENSMUSG00000009112	Bcl2l13	-0.464161	0.000538927
ENSMUSG00000025134	Alyref	-0.463484	0.000162416
ENSMUSG00000069495	Epc2	-0.463207	0.00877237
ENSMUSG00000036550	Cnot1	-0.462684	0.00125308
ENSMUSG00000050565	Tor1aip2	-0.461751	0.000147326
ENSMUSG00000028248	Pnisr	-0.460831	0.00979847
ENSMUSG00000040250	Ints13	-0.460439	0.00040548
ENSMUSG00000027236	Eif3j1	-0.460053	0.00318711
ENSMUSG00000034210	Efcab14	-0.459358	0.00157282
ENSMUSG00000027570	Col9a3	-0.458687	0.0041892
ENSMUSG00000039735	Fnbp1l	-0.457785	0.000309524
ENSMUSG00000038612	Mcl1	-0.457767	2.74512e-05
ENSMUSG00000038886	Man2a2	-0.457606	0.00610098
ENSMUSG00000021258	Ccnk	-0.457564	0.00934978
ENSMUSG00000060181	Slc35e3	-0.456399	0.00513715
ENSMUSG00000048379	Socs4	-0.456008	0.00736682
ENSMUSG00000026159	Agfg1	-0.45589	0.00959542
ENSMUSG00000040511	Pvr	-0.455354	0.000247073
ENSMUSG00000026479	Lamc2	-0.455215	0.00130585
ENSMUSG00000025234	Arih1	-0.454506	0.00116014
ENSMUSG00000057637	Prdm2	-0.454366	0.00236046
ENSMUSG00000026361	Cdc73	-0.454315	0.00741066
ENSMUSG00000032217	Rnf111	-0.454257	0.000865804
ENSMUSG00000032280	Tle3	-0.454026	0.00427612
ENSMUSG00000027164	Traf6	-0.453931	0.00222344
ENSMUSG00000022911	Arl13b	-0.453656	0.00134512
ENSMUSG00000035686	Thrsp	-0.453476	0.00635937
ENSMUSG00000035967	Ints6l	-0.453165	0.00491727
ENSMUSG00000028552	Eps15	-0.453087	0.000223511
ENSMUSG00000032328	Tmem30a	-0.452876	0.000795611
ENSMUSG00000033487	Fndc3a	-0.452791	0.00439737
ENSMUSG00000036093	Arl5a	-0.451897	0.00439737
ENSMUSG00000053774	Ubxn7	-0.45106	0.00309667
ENSMUSG00000006423	C330007P06Rik	-0.449982	0.00462795
ENSMUSG00000028640	Tfap2c	-0.449503	0.00126435
ENSMUSG00000038733	Wdr26	-0.448772	6.75873e-05
ENSMUSG00000029578	Wipi2	-0.447513	9.43344e-05
ENSMUSG00000024077	Strn	-0.447402	0.00652921
ENSMUSG00000000804	Usp32	-0.444529	0.00941365
ENSMUSG00000018541	Cwc25	-0.442344	0.00311023
ENSMUSG00000020863	Luc7l3	-0.442045	5.51644e-06
ENSMUSG00000050310	Rictor	-0.441886	0.00077113
ENSMUSG00000027598	Itch	-0.44134	1.77292e-05
ENSMUSG00000025982	Sf3b1	-0.441322	0.000149424
ENSMUSG00000024190	Dusp1	-0.441036	0.00261987
ENSMUSG00000040857	Erf	-0.441034	0.000637917
ENSMUSG00000020149	Rab1a	-0.440715	0.000130054
ENSMUSG00000035621	Midn	-0.440569	0.00349497
ENSMUSG00000041781	Cpsf2	-0.440529	0.00590069
ENSMUSG00000038119	Cdon	-0.440466	0.00982502
ENSMUSG00000028693	Nasp	-0.44018	0.000361067
ENSMUSG00000022698	Naa50	-0.439556	0.000895551
ENSMUSG00000052144	Ppp4r2	-0.439223	0.000538961
ENSMUSG00000036257	Pnpla8	-0.438758	0.000540375
ENSMUSG00000038369	Ncoa6	-0.437638	0.00221406
ENSMUSG00000037253	Mex3c	-0.437179	0.000129098
ENSMUSG00000005371	Fbxo11	-0.436112	0.000569915
ENSMUSG00000039646	Vasn	-0.43609	0.00855025
ENSMUSG00000027180	Fbxo3	-0.435006	0.000443869
ENSMUSG00000032068	Plet1	-0.434	0.00511877
ENSMUSG00000029461	Fam168a	-0.43379	0.00521466
ENSMUSG00000032096	Arcn1	-0.433518	3.84142e-05
ENSMUSG00000022346	Myc	-0.432746	0.00349497
ENSMUSG00000029467	Atp2a2	-0.432455	0.000268144
ENSMUSG00000020733	Slc9a3r1	-0.432382	0.000552037
ENSMUSG00000024098	Twsg1	-0.432244	0.000694019
ENSMUSG00000024068	Spast	-0.431322	0.00389439
ENSMUSG00000030956	Fam53b	-0.430986	0.00294249
ENSMUSG00000040928	S100pbp	-0.429657	0.00362708
ENSMUSG00000005198	Polr2a	-0.42942	0.0037309
ENSMUSG00000003623	Crot	-0.428529	0.00171604
ENSMUSG00000026843	Fubp3	-0.42786	0.00202769
ENSMUSG00000040859	Bsdc1	-0.427641	0.000539193
ENSMUSG00000039458	Mtmr12	-0.427425	0.00879821
ENSMUSG00000013033	Adgrl1	-0.427339	0.0060831
ENSMUSG00000037465	Klf10	-0.4272	0.0060791
ENSMUSG00000020023	Tmcc3	-0.426668	0.00990371
ENSMUSG00000048915	Efna5	-0.426582	0.00692672
ENSMUSG00000024360	Etf1	-0.426558	0.000378424
ENSMUSG00000066232	Ipo7	-0.426158	0.000608082
ENSMUSG00000025907	Rb1cc1	-0.424661	0.00341831
ENSMUSG00000062098	Btbd3	-0.423915	0.00692672
ENSMUSG00000002052	Supt6	-0.423694	0.00010173
ENSMUSG00000022358	Fbxo32	-0.4235	0.00183152
ENSMUSG00000057561	Eif1a	-0.423359	0.000821243
ENSMUSG00000052681	Rap1b	-0.422876	0.00215897
ENSMUSG00000025607	Copg2	-0.422874	0.000906225
ENSMUSG00000008200	Fnbp4	-0.420755	4.68839e-05
ENSMUSG00000041530	Ago1	-0.420111	0.00100811
ENSMUSG00000045671	Spred2	-0.419582	0.00433202
ENSMUSG00000039852	Rere	-0.419429	0.00299841
ENSMUSG00000026915	Strbp	-0.419096	0.00559813
ENSMUSG00000047777	Phf13	-0.419095	0.00355918
ENSMUSG00000010277	2610507B11Rik	-0.418887	0.00088025
ENSMUSG00000017119	Nbr1	-0.418243	0.0012675
ENSMUSG00000048271	Rbm33	-0.418207	0.00104003
ENSMUSG00000001891	Ugp2	-0.417599	0.000239783
ENSMUSG00000038013	Wipf2	-0.417239	0.00655697
ENSMUSG00000060733	Ipmk	-0.416956	0.00990371
ENSMUSG00000020780	Srp68	-0.416834	0.00116886
ENSMUSG00000027091	Zc3h15	-0.416234	0.000623861
ENSMUSG00000006930	Hap1	-0.415464	0.00615323
ENSMUSG00000001419	Mef2d	-0.415322	0.0060212
ENSMUSG00000021012	Zc3h14	-0.414185	0.00354211
ENSMUSG00000033014	Trim33	-0.413177	0.00686844
ENSMUSG00000007880	Arid1a	-0.412481	0.00443543
ENSMUSG00000041654	Slc39a11	-0.412123	0.00991082
ENSMUSG00000032540	Abhd5	-0.411882	0.000560747
ENSMUSG00000045767	B230219D22Rik	-0.411834	0.00161323
ENSMUSG00000053716	Dusp7	-0.411756	0.00432277
ENSMUSG00000029201	Ugdh	-0.411587	0.00106847
ENSMUSG00000061244	Exoc5	-0.410849	0.00515715
ENSMUSG00000020142	Slc1a4	-0.410739	0.00290574
ENSMUSG00000028676	Srsf10	-0.410706	0.000360601
ENSMUSG00000079614	Seh1l	-0.409944	0.00735325
ENSMUSG00000047126	Cltc	-0.409661	0.00130143
ENSMUSG00000025240	Sacm1l	-0.409374	0.00670672
ENSMUSG00000022314	Rad21	-0.409161	0.00893038
ENSMUSG00000072704	Smim10l1	-0.408797	0.00597412
ENSMUSG00000020015	Cdk17	-0.407772	0.00917787
ENSMUSG00000018160	Med1	-0.405497	0.00358394
ENSMUSG00000028668	Eloa	-0.404861	0.00169013
ENSMUSG00000014353	Tmem87b	-0.404156	0.00343754
ENSMUSG00000042506	Usp22	-0.403431	0.000273346
ENSMUSG00000053841	Txlna	-0.402729	0.00195974
ENSMUSG00000034135	Sik3	-0.402292	0.00250603
ENSMUSG00000037119	Fam91a1	-0.401341	0.00202227
ENSMUSG00000002718	Cse1l	-0.400543	0.00873193
ENSMUSG00000064145	Arih2	-0.39852	0.00746312
ENSMUSG00000040648	Ppip5k2	-0.39782	0.00353833
ENSMUSG00000004040	Stat3	-0.397592	0.00269101
ENSMUSG00000030304	Ergic2	-0.397514	0.00209291
ENSMUSG00000025935	Tram1	-0.395474	0.00324958
ENSMUSG00000032340	Neo1	-0.395006	0.00664154
ENSMUSG00000063015	Ccni	-0.393515	0.00084402
ENSMUSG00000027365	Trpm7	-0.393071	0.00521466
ENSMUSG00000056429	Tgoln1	-0.391903	0.00646505
ENSMUSG00000020644	Id2	-0.391693	0.000306483
ENSMUSG00000076431	Sox4	-0.391471	0.000205022
ENSMUSG00000019210	Atp6v1e1	-0.390907	0.00269101
ENSMUSG00000058454	Dhcr7	-0.390351	0.0072615
ENSMUSG00000030629	Zfand6	-0.390049	0.00226332
ENSMUSG00000016559	H3f3b	-0.388775	0.000131126
ENSMUSG00000047281	Sfn	-0.388663	0.00801417
ENSMUSG00000034761	Map4k5	-0.38805	0.00825994
ENSMUSG00000035941	Ibtk	-0.387406	0.00784978
ENSMUSG00000005506	Celf1	-0.385606	0.000443161
ENSMUSG00000040785	Ttc3	-0.385562	0.00410328
ENSMUSG00000035437	Rabgap1	-0.385011	0.00370859
ENSMUSG00000021427	Ssr1	-0.384344	0.00151529
ENSMUSG00000000001	Gnai3	-0.384276	0.00345857
ENSMUSG00000006932	Ctnnb1	-0.384046	0.0010481
ENSMUSG00000020745	Pafah1b1	-0.383028	4.83469e-05
ENSMUSG00000023830	Igf2r	-0.382709	0.00692672
ENSMUSG00000047454	Gphn	-0.382108	0.00598223
ENSMUSG00000022462	Slc38a2	-0.381826	0.00219952
ENSMUSG00000043131	Mob1a	-0.381673	0.00629523
ENSMUSG00000024096	Ralbp1	-0.380908	0.00171113
ENSMUSG00000021171	Esyt2	-0.380442	0.000473598
ENSMUSG00000032376	Usp3	-0.380424	0.00983658
ENSMUSG00000017485	Top2b	-0.380097	0.00741458
ENSMUSG00000053110	Yap1	-0.37954	0.00419201
ENSMUSG00000020747	Tmem94	-0.378738	0.00133506
ENSMUSG00000058318	Phf21a	-0.378194	0.00449587
ENSMUSG00000038127	Ccdc50	-0.378173	0.00176018
ENSMUSG00000040565	Btaf1	-0.378124	0.00802679
ENSMUSG00000027782	Kpna4	-0.377329	0.00549826
ENSMUSG00000074513	Arfip1	-0.376782	0.00727871
ENSMUSG00000032393	Dpp8	-0.376038	0.000360423
ENSMUSG00000059248	2009-09-01	-0.375103	0.00960956
ENSMUSG00000040850	Psme4	-0.374967	0.000954666
ENSMUSG00000027665	Pik3ca	-0.374743	0.00283187
ENSMUSG00000000826	Dnajc5	-0.374499	0.000835094
ENSMUSG00000058013	2011-09-01	-0.373696	0.00745337
ENSMUSG00000031714	Gab1	-0.373491	0.00820636
ENSMUSG00000047694	Yipf6	-0.373241	0.00686015
ENSMUSG00000057406	Nsd2	-0.373168	0.0051927
ENSMUSG00000061130	Ppm1b	-0.372325	0.00324859
ENSMUSG00000030096	Slc6a6	-0.372308	0.00588906
ENSMUSG00000032633	Flcn	-0.372089	0.00233714
ENSMUSG00000029686	Cul1	-0.371634	0.00534618
ENSMUSG00000031988	Vps26b	-0.37111	0.00990371
ENSMUSG00000026753	Ppp6c	-0.370916	0.00549826
ENSMUSG00000026502	Desi2	-0.370804	0.00350416
ENSMUSG00000017776	Crk	-0.369794	0.00023542
ENSMUSG00000042079	Hnrnpf	-0.369461	0.00680508
ENSMUSG00000038024	Dennd4c	-0.367658	0.009582
ENSMUSG00000003131	Pafah1b2	-0.367594	0.000938557
ENSMUSG00000021687	Scamp1	-0.366232	0.0040315
ENSMUSG00000025239	Limd1	-0.365622	0.00369469
ENSMUSG00000040548	Tex2	-0.365414	0.00912807
ENSMUSG00000031095	Cul4b	-0.364379	0.00585751
ENSMUSG00000016831	Tox4	-0.364048	0.0038047
ENSMUSG00000024913	Lrp5	-0.363476	0.00254213
ENSMUSG00000024286	Ccny	-0.36328	0.000694621
ENSMUSG00000021945	Zmym2	-0.363203	0.00498144
ENSMUSG00000051790	Nlgn2	-0.361946	0.00532899
ENSMUSG00000026918	Brd3	-0.361423	0.00753349
ENSMUSG00000039953	Clstn1	-0.359611	0.00444926
ENSMUSG00000022124	Fbxl3	-0.359067	0.00944325
ENSMUSG00000038708	Golga4	-0.357142	0.00658634
ENSMUSG00000020516	Rps6kb1	-0.356768	0.00431919
ENSMUSG00000024908	Ppp6r3	-0.355184	0.000650783
ENSMUSG00000025173	Wdr45b	-0.353935	0.00412798
ENSMUSG00000005610	Eif4g2	-0.353854	0.000447814
ENSMUSG00000047945	Marcksl1	-0.353768	0.00424646
ENSMUSG00000032745	Gpbp1	-0.352529	0.00249378
ENSMUSG00000021840	Mapk1ip1l	-0.352322	0.00960026
ENSMUSG00000038172	Ttc39b	-0.352142	0.00502012
ENSMUSG00000020385	Clk4	-0.351787	0.00428733
ENSMUSG00000029405	G3bp2	-0.351575	0.00249626
ENSMUSG00000001632	Brpf1	-0.351217	0.00843373
ENSMUSG00000004980	Hnrnpa2b1	-0.350463	0.00990283
ENSMUSG00000042608	Stk40	-0.349492	0.00498942
ENSMUSG00000028580	Pum1	-0.347819	0.00215822
ENSMUSG00000038437	Mllt6	-0.347605	0.00218933
ENSMUSG00000052915	Msl1	-0.347107	0.000566754
ENSMUSG00000020390	Ube2b	-0.346861	0.00106817
ENSMUSG00000055531	Cpsf6	-0.346018	0.00323523
ENSMUSG00000020738	Sumo2	-0.345581	0.00244631
ENSMUSG00000022387	Brd1	-0.345142	0.00304002
ENSMUSG00000028809	Srrm1	-0.343429	0.00841692
ENSMUSG00000021000	Ctage5	-0.343122	0.00586003
ENSMUSG00000035569	Ankrd11	-0.341292	0.00150857
ENSMUSG00000052040	Klf13	-0.338875	0.000483178
ENSMUSG00000021843	Ktn1	-0.335895	0.00379759
ENSMUSG00000042688	Mapk6	-0.335503	0.00542821
ENSMUSG00000042557	Sin3a	-0.335179	0.00849766
ENSMUSG00000025162	Csnk1d	-0.329008	0.000339322
ENSMUSG00000025246	Tbl1x	-0.327693	0.00163906
ENSMUSG00000023852	Chd1	-0.32666	0.00610308
ENSMUSG00000054364	Rhob	-0.325866	0.00840596
ENSMUSG00000031600	Vps37a	-0.325785	0.00745991
ENSMUSG00000041915	Ammecr1l	-0.323924	0.00375447
ENSMUSG00000034341	Wbp2	-0.323501	0.00946318
ENSMUSG00000009741	Ubp1	-0.318881	0.007578
ENSMUSG00000039275	Foxk2	-0.314269	0.00875458
ENSMUSG00000078622	Ccdc47	-0.313364	0.00529792
ENSMUSG00000032382	Snx1	-0.311255	0.00810165
ENSMUSG00000020719	Ddx5	-0.308892	0.00428694
ENSMUSG00000030530	Furin	-0.301853	0.00842866
ENSMUSG00000025130	P4hb	-0.299372	0.0036274
ENSMUSG00000030002	Dusp11	-0.298709	0.00568792
ENSMUSG00000059796	Eif4a1	-0.296874	0.000440981
ENSMUSG00000028173	Wls	-0.295756	0.00509317
ENSMUSG00000027893	Ahcyl1	-0.293586	0.00149115
ENSMUSG00000051223	Bzw1	-0.292142	0.00987197
ENSMUSG00000041891	Lman1	-0.291222	0.00983658
ENSMUSG00000026878	Rab14	-0.289213	0.00393092
ENSMUSG00000014349	Ube2z	-0.284975	0.00765915
ENSMUSG00000001440	Kpnb1	-0.28258	0.00634549
ENSMUSG00000029390	Tmed2	-0.282299	0.00534532
ENSMUSG00000034088	Hdlbp	-0.276404	0.00113585
ENSMUSG00000027184	Caprin1	-0.257909	0.0067356
ENSMUSG00000009079	Ewsr1	-0.256844	0.00794099
ENSMUSG00000018583	G3bp1	-0.254659	0.00771999
ENSMUSG00000038014	Fam120a	-0.246293	0.00620048
ENSMUSG00000020358	Hnrnpab	-0.24333	0.00679885
ENSMUSG00000026034	Clk1	-0.239212	0.0069484
ENSMUSG00000020349	Ppp2ca	-0.238306	0.00961382
ENSMUSG00000061232	H2-K1	0.222159	0.00511877
ENSMUSG00000013787	Ehmt2	0.259929	0.0092191
ENSMUSG00000020827	Mink1	0.2711	0.00541235
ENSMUSG00000035929	H2-Q4	0.27158	0.00349932
ENSMUSG00000052310	Slc39a1	0.276079	0.00768303
ENSMUSG00000016554	Eif3d	0.276759	0.00662898
ENSMUSG00000019804	Snx3	0.286253	0.004556
ENSMUSG00000056116	H2-T22	0.287532	0.00534386
ENSMUSG00000050708	Ftl1	0.290857	0.00755013
ENSMUSG00000026229	Psmd1	0.292427	0.0047543
ENSMUSG00000040356	Skiv2l	0.298379	0.0099408
ENSMUSG00000025651	Uqcrc1	0.300229	0.00477369
ENSMUSG00000037072	Selenof	0.302616	0.00799086
ENSMUSG00000031751	Amfr	0.303205	0.00125237
ENSMUSG00000027466	Rbck1	0.307521	0.008585
ENSMUSG00000033047	Eif3l	0.315127	0.00439125
ENSMUSG00000024941	Scyl1	0.316976	0.00656926
ENSMUSG00000029430	Ran	0.317161	0.00832986
ENSMUSG00000002010	Idh3g	0.320189	0.00406894
ENSMUSG00000030805	Stx4a	0.321738	0.00433996
ENSMUSG00000030605	Mfge8	0.322213	0.00814457
ENSMUSG00000063065	Mapk3	0.323403	0.00824409
ENSMUSG00000025503	Taldo1	0.324739	0.00627133
ENSMUSG00000028494	Plin2	0.325846	0.00339918
ENSMUSG00000035885	Cox8a	0.325911	0.0072549
ENSMUSG00000024566	Atp9b	0.326342	0.007049
ENSMUSG00000024308	Tapbp	0.3285	0.00622744
ENSMUSG00000068739	Sars	0.328561	0.000556518
ENSMUSG00000095041	AC149090.1	0.328933	0.00756555
ENSMUSG00000024335	Brd2	0.329822	0.00193114
ENSMUSG00000041571	Selenow	0.331878	0.00606906
ENSMUSG00000041130	Zfp598	0.333612	0.000592248
ENSMUSG00000058076	Sdhc	0.335004	0.0085631
ENSMUSG00000038828	Tmem214	0.33507	0.00591308
ENSMUSG00000008348	Ubc	0.338872	0.000432572
ENSMUSG00000025362	Rps26	0.340355	0.0024236
ENSMUSG00000040811	Eml2	0.341188	0.0041161
ENSMUSG00000030689	Ino80e	0.341481	0.00859561
ENSMUSG00000090841	Myl6	0.342546	0.0020195
ENSMUSG00000041360	Pum3	0.342725	0.00814278
ENSMUSG00000030432	Rpl28	0.346719	0.0021205
ENSMUSG00000029455	Aldh2	0.346785	0.00140099
ENSMUSG00000060675	Pla2g16	0.350782	0.00485797
ENSMUSG00000024856	Cdk2ap2	0.351179	0.00336123
ENSMUSG00000039656	Rxrb	0.352882	0.00578538
ENSMUSG00000033916	Chmp2a	0.354318	0.00148268
ENSMUSG00000008682	Rpl10	0.354448	0.00606657
ENSMUSG00000033088	Triobp	0.355063	0.00924333
ENSMUSG00000022956	Atp5o	0.355737	0.00353436
ENSMUSG00000053565	Eif3k	0.356847	0.00315771
ENSMUSG00000019494	Cops6	0.358512	0.0020138
ENSMUSG00000031059	Ndufb11	0.35995	0.00645211
ENSMUSG00000028673	Fuca1	0.3602	0.00913332
ENSMUSG00000026209	Dnpep	0.360773	0.00508361
ENSMUSG00000025410	Dctn2	0.361023	0.00485692
ENSMUSG00000013593	Ndufs2	0.361029	0.00855232
ENSMUSG00000044600	Smim7	0.362074	0.00869465
ENSMUSG00000060036	Rpl3	0.364255	0.00493623
ENSMUSG00000024735	Prpf19	0.364915	0.00181918
ENSMUSG00000052456	Asna1	0.365359	0.00347999
ENSMUSG00000012405	Rpl15	0.366992	0.00328296
ENSMUSG00000018040	Rrp7a	0.369202	0.0030195
ENSMUSG00000002015	Bcap31	0.370032	0.000377949
ENSMUSG00000011114	Tbrg1	0.37023	0.000886216
ENSMUSG00000003099	Ppp5c	0.370251	0.00389326
ENSMUSG00000022551	Cyc1	0.371532	0.00320005
ENSMUSG00000068523	Gng5	0.37313	0.0033112
ENSMUSG00000038034	Igsf8	0.373363	0.00230575
ENSMUSG00000038374	Rbm8a	0.373576	0.00243443
ENSMUSG00000030682	Cdipt	0.374136	0.00251299
ENSMUSG00000071708	Sms	0.376928	0.00609398
ENSMUSG00000052423	B4galt3	0.379405	0.00607937
ENSMUSG00000000902	Smarcb1	0.379429	0.00586003
ENSMUSG00000073411	H2-D1	0.379525	1.06156e-06
ENSMUSG00000022791	Tnk2	0.381008	0.00250662
ENSMUSG00000026822	Lcn2	0.38134	0.000369239
ENSMUSG00000025917	Cops5	0.381656	0.00775561
ENSMUSG00000022614	Lmf2	0.382579	0.00142217
ENSMUSG00000005625	Psmd4	0.383056	0.00631259
ENSMUSG00000025858	Get4	0.383671	0.0081343
ENSMUSG00000026860	Sh3glb2	0.384882	0.00516061
ENSMUSG00000009549	Srp14	0.385184	0.00377479
ENSMUSG00000022216	Psme1	0.386391	0.000146494
ENSMUSG00000023944	Hsp90ab1	0.387247	9.93156e-05
ENSMUSG00000025487	Psmd13	0.387298	0.00480783
ENSMUSG00000017404	Rpl19	0.387355	0.00869849
ENSMUSG00000022556	Hsf1	0.388202	0.00643173
ENSMUSG00000022817	Itgb5	0.389199	0.0019583
ENSMUSG00000019505	Ubb	0.390221	6.90863e-07
ENSMUSG00000043059	Zfp513	0.390387	0.00726708
ENSMUSG00000060969	Irx1	0.390826	0.000302029
ENSMUSG00000067212	H2-T23	0.392145	4.12251e-05
ENSMUSG00000022761	Lztr1	0.393964	0.0019083
ENSMUSG00000016481	Cr1l	0.395292	0.00795808
ENSMUSG00000015092	Edf1	0.397189	0.003442
ENSMUSG00000036435	Exoc1	0.397668	0.00284481
ENSMUSG00000028234	Rps20	0.399498	0.0067549
ENSMUSG00000030774	Pak1	0.400117	0.00678213
ENSMUSG00000019432	Ddx39b	0.400596	0.000272663
ENSMUSG00000020806	Rhbdf2	0.401251	0.0007978
ENSMUSG00000036249	Rbm43	0.401337	0.00149773
ENSMUSG00000017715	Pgs1	0.401563	0.00360947
ENSMUSG00000023367	Tmem176a	0.402142	0.00156894
ENSMUSG00000018398	2008-09-01	0.402146	0.00860372
ENSMUSG00000023007	Prpf40b	0.403002	0.00513715
ENSMUSG00000021737	Psmd6	0.403495	0.00553907
ENSMUSG00000003813	Rad23a	0.403597	0.00225589
ENSMUSG00000006818	Sod2	0.40375	0.00101761
ENSMUSG00000024012	Mtch1	0.40389	0.00031992
ENSMUSG00000007036	Abhd16a	0.404836	0.00224748
ENSMUSG00000038812	Trmt112	0.40495	0.00626206
ENSMUSG00000026309	Ilkap	0.404969	0.0043636
ENSMUSG00000036989	Trim3	0.407088	0.00780662
ENSMUSG00000038274	Fau	0.407582	0.00980262
ENSMUSG00000060477	Irak2	0.408322	0.00486256
ENSMUSG00000022962	Gart	0.409515	0.00247585
ENSMUSG00000030688	Stard10	0.409678	0.00909814
ENSMUSG00000001750	Tcirg1	0.409692	0.0045186
ENSMUSG00000026965	Anapc2	0.409924	0.00083734
ENSMUSG00000030847	Bag3	0.410092	0.00724128
ENSMUSG00000000827	Tpd52l2	0.410098	0.00487673
ENSMUSG00000073481	Marc2	0.411783	0.00327351
ENSMUSG00000025374	Nabp2	0.411821	0.00636478
ENSMUSG00000058600	Rpl30	0.411939	0.00236046
ENSMUSG00000017756	Slc12a7	0.412166	0.00629928
ENSMUSG00000029071	Dvl1	0.412374	0.00338951
ENSMUSG00000031820	Babam1	0.412643	0.00423239
ENSMUSG00000036398	Ppp1r11	0.412908	0.00873133
ENSMUSG00000022452	Smdt1	0.413321	0.00547191
ENSMUSG00000059070	Rpl18	0.414377	0.00322435
ENSMUSG00000034255	Arhgap27	0.414886	0.00138686
ENSMUSG00000031078	Cttn	0.417523	0.0019153
ENSMUSG00000021024	Psma6	0.418503	0.00873638
ENSMUSG00000023904	Hcfc1r1	0.418539	0.00243859
ENSMUSG00000071074	Yipf3	0.4199	0.000253903
ENSMUSG00000015714	Cers2	0.420482	6.45818e-05
ENSMUSG00000063856	Gpx1	0.422732	0.00980262
ENSMUSG00000027455	Nsfl1c	0.423056	0.00152176
ENSMUSG00000031320	Rps4x	0.423077	2.16166e-05
ENSMUSG00000002319	Ipo4	0.423319	0.00447271
ENSMUSG00000069020	Urm1	0.423859	0.00781111
ENSMUSG00000025499	Hras	0.424697	0.00215692
ENSMUSG00000096727	Psmb9	0.424777	4.38995e-05
ENSMUSG00000045128	Rpl18a	0.425511	0.000131514
ENSMUSG00000006333	Rps9	0.429869	0.00285127
ENSMUSG00000053332	Gas5	0.430074	0.00432072
ENSMUSG00000009013	Dynll1	0.431471	0.00145275
ENSMUSG00000022538	Lsg1	0.431968	0.00255462
ENSMUSG00000017707	Serinc3	0.432274	0.00268401
ENSMUSG00000036751	Cox6b1	0.432299	0.00559515
ENSMUSG00000026201	Stk16	0.433012	0.00443837
ENSMUSG00000005779	Psmb4	0.433355	0.000518463
ENSMUSG00000001909	Trmt1	0.43413	0.0043354
ENSMUSG00000029547	Ints1	0.435525	0.00196597
ENSMUSG00000047547	Cltb	0.436244	0.0001746
ENSMUSG00000053483	Usp21	0.436975	0.00161249
ENSMUSG00000071655	Ubxn1	0.437962	0.00166796
ENSMUSG00000007029	Vars	0.438162	0.000482897
ENSMUSG00000029559	2210016L21Rik	0.439039	0.00840527
ENSMUSG00000071644	Eef1g	0.439868	6.36797e-06
ENSMUSG00000003970	Rpl8	0.439959	5.08119e-05
ENSMUSG00000001123	Lgals9	0.441148	0.000192301
ENSMUSG00000055762	Eef1d	0.441313	0.000179616
ENSMUSG00000026425	Srgap2	0.442999	0.000667519
ENSMUSG00000014769	Psmb1	0.444077	0.00031842
ENSMUSG00000080268	Brms1	0.444829	0.00479853
ENSMUSG00000025260	Hsd17b10	0.445011	0.00477369
ENSMUSG00000042426	Dhx29	0.445295	0.00647312
ENSMUSG00000023008	Fmnl3	0.445875	6.06947e-05
ENSMUSG00000002345	Borcs8	0.44636	0.00893906
ENSMUSG00000037606	Osbpl5	0.44647	0.00263775
ENSMUSG00000022108	Itm2b	0.446637	2.7128e-05
ENSMUSG00000070643	Sox13	0.446845	0.00871296
ENSMUSG00000024170	Telo2	0.446979	0.00947947
ENSMUSG00000028932	Psmc2	0.447968	2.23635e-05
ENSMUSG00000071657	Bscl2	0.44805	0.000205022
ENSMUSG00000024538	Ppic	0.448445	0.00258965
ENSMUSG00000003429	Rps11	0.44934	0.00202769
ENSMUSG00000041697	Cox6a1	0.449683	5.57724e-05
ENSMUSG00000024845	Tmem134	0.449934	0.00143287
ENSMUSG00000026427	Eif2d	0.450929	0.00017089
ENSMUSG00000064210	Ano6	0.45137	0.000787603
ENSMUSG00000040913	Fbxw4	0.453115	0.00292657
ENSMUSG00000001062	Vps9d1	0.454012	0.00426718
ENSMUSG00000063802	Hspbp1	0.454048	0.00713675
ENSMUSG00000025278	Flnb	0.455324	0.00862711
ENSMUSG00000036632	Alg5	0.455642	0.00320772
ENSMUSG00000071379	Hpcal1	0.456168	0.00571546
ENSMUSG00000029166	Mapre3	0.457483	0.00100385
ENSMUSG00000024955	Esrra	0.45765	0.00124923
ENSMUSG00000022010	Tsc22d1	0.457664	0.00292314
ENSMUSG00000026657	Frmd4a	0.458002	0.000829229
ENSMUSG00000024312	Wdr46	0.458846	0.00879282
ENSMUSG00000030342	Cd9	0.459314	0.000134604
ENSMUSG00000032112	Trappc4	0.459789	0.00921277
ENSMUSG00000020184	Mdm2	0.461455	0.000829571
ENSMUSG00000039615	Stub1	0.4621	0.00307268
ENSMUSG00000021939	Ctsb	0.462249	0.000466511
ENSMUSG00000030595	Nfkbib	0.462401	0.00466984
ENSMUSG00000059734	Ndufs8	0.46276	0.00575404
ENSMUSG00000037563	Rps16	0.462821	0.00370368
ENSMUSG00000027655	Dhx35	0.463961	0.00600079
ENSMUSG00000031479	Vps36	0.464168	0.000179042
ENSMUSG00000034892	Rps29	0.464386	0.000571208
ENSMUSG00000026803	Ttf1	0.46618	0.00791507
ENSMUSG00000032026	Rexo2	0.466357	0.000592127
ENSMUSG00000022474	Pmm1	0.466443	0.00818065
ENSMUSG00000027257	Pacsin3	0.467523	0.00942889
ENSMUSG00000024193	Phf1	0.468257	0.00681291
ENSMUSG00000012848	Rps5	0.468301	0.000498349
ENSMUSG00000020022	Ndufa12	0.469144	0.0032914
ENSMUSG00000029507	Pus1	0.470252	0.0041525
ENSMUSG00000072235	Tuba1a	0.470447	4.69903e-05
ENSMUSG00000023043	Krt18	0.47115	0.00293415
ENSMUSG00000028057	Rit1	0.471519	0.00182563
ENSMUSG00000057229	Dmac2	0.473269	0.0088124
ENSMUSG00000030341	Tnfrsf1a	0.473455	4.84141e-05
ENSMUSG00000009293	Ube2g2	0.474148	0.000662692
ENSMUSG00000004667	Polr2e	0.47457	0.000631559
ENSMUSG00000026269	Rnpepl1	0.4748	3.45815e-05
ENSMUSG00000063268	Parp10	0.474985	0.000245374
ENSMUSG00000030603	Psmc4	0.47518	0.000829229
ENSMUSG00000051154	Commd3	0.47574	0.00606906
ENSMUSG00000024875	Yif1a	0.476063	0.00513093
ENSMUSG00000038351	Sgsm2	0.477175	0.00268963
ENSMUSG00000069744	Psmb3	0.477336	0.000742336
ENSMUSG00000037916	Ndufv1	0.477386	0.000456083
ENSMUSG00000052151	Plpp2	0.477724	0.000668551
ENSMUSG00000024889	Rce1	0.478193	0.00161738
ENSMUSG00000029781	Fkbp9	0.479224	0.00273843
ENSMUSG00000027472	Pdrg1	0.479976	3.55761e-05
ENSMUSG00000078485	Plekhn1	0.480208	0.00366314
ENSMUSG00000026003	Acadl	0.481669	0.000186854
ENSMUSG00000031818	Cox4i1	0.482537	0.00492333
ENSMUSG00000000555	Itga5	0.482705	0.000204318
ENSMUSG00000007891	Ctsd	0.482946	9.60075e-06
ENSMUSG00000037820	Tgm2	0.48319	0.000275075
ENSMUSG00000021794	Glud1	0.484634	3.36265e-07
ENSMUSG00000028081	Rps3a1	0.485552	0.00224748
ENSMUSG00000026104	Stat1	0.48612	0.000269441
ENSMUSG00000025147	Mob2	0.486779	0.00250074
ENSMUSG00000005674	Tomm40l	0.488861	0.0020589
ENSMUSG00000017188	Coa3	0.488958	0.00351072
ENSMUSG00000035674	Ndufa3	0.488998	0.00881749
ENSMUSG00000059714	Flot1	0.489248	0.000286949
ENSMUSG00000002728	Naa20	0.490259	0.00692672
ENSMUSG00000031146	Plp2	0.490791	0.00187129
ENSMUSG00000024163	Mapk8ip3	0.491859	0.00357254
ENSMUSG00000055401	Fbxo6	0.493659	0.00150076
ENSMUSG00000073702	Rpl31	0.493751	0.00924958
ENSMUSG00000040220	Gas8	0.494214	0.00823121
ENSMUSG00000035722	Abca7	0.494518	0.00639346
ENSMUSG00000027133	Nop10	0.494852	0.00629032
ENSMUSG00000079557	March2	0.495536	0.00435148
ENSMUSG00000021814	Anxa7	0.496227	6.31546e-05
ENSMUSG00000051786	Tubgcp6	0.496669	0.00134614
ENSMUSG00000062031	Pgghg	0.497008	0.000497758
ENSMUSG00000000339	Rtca	0.497013	0.00614127
ENSMUSG00000029036	Atad3a	0.497211	0.00307525
ENSMUSG00000089762	Ier5l	0.497465	0.00349148
ENSMUSG00000071649	B3gat3	0.497517	0.000421207
ENSMUSG00000020267	Hint1	0.497753	0.00713675
ENSMUSG00000001794	Capns1	0.498759	6.95454e-07
ENSMUSG00000051007	Gatd1	0.499124	0.00736682
ENSMUSG00000045679	Pqlc3	0.499135	0.00430214
ENSMUSG00000022971	Ifnar2	0.499764	8.79909e-05
ENSMUSG00000050621	Rps27rt	0.500158	0.00266114
ENSMUSG00000029649	Pomp	0.500234	0.00249923
ENSMUSG00000079197	Psme2	0.500242	0.000187578
ENSMUSG00000027566	Psma7	0.500844	0.000795812
ENSMUSG00000039242	B3galnt2	0.501056	0.000218018
ENSMUSG00000026213	Stk11ip	0.501415	0.00184096
ENSMUSG00000025068	Gsto1	0.5018	0.00284481
ENSMUSG00000042541	Sem1	0.503603	0.00292203
ENSMUSG00000004996	Mri1	0.504465	0.00992983
ENSMUSG00000036199	Ndufa13	0.504843	0.000200413
ENSMUSG00000025208	Mrpl43	0.505004	0.00492337
ENSMUSG00000025508	Rplp2	0.505483	0.000682426
ENSMUSG00000033545	Znrf1	0.505712	6.42679e-06
ENSMUSG00000068749	Psma5	0.506229	0.00194701
ENSMUSG00000035342	Lzts2	0.506584	0.00375436
ENSMUSG00000037326	Capn15	0.506624	0.00267462
ENSMUSG00000022559	Fbxl6	0.506709	0.00119433
ENSMUSG00000031511	Arhgef7	0.506715	0.000259919
ENSMUSG00000015837	Sqstm1	0.506809	3.27853e-05
ENSMUSG00000038690	Atp5j2	0.507508	0.00670672
ENSMUSG00000020260	Pofut2	0.509111	0.000357962
ENSMUSG00000010376	Nedd8	0.509404	0.000466068
ENSMUSG00000029319	Coq2	0.509813	8.25211e-05
ENSMUSG00000039745	Htatip2	0.510244	0.00516416
ENSMUSG00000019461	Plscr3	0.512032	0.000501824
ENSMUSG00000020153	Ndufs7	0.512564	0.00222706
ENSMUSG00000032491	Nradd	0.513168	0.00727986
ENSMUSG00000070003	Ssbp4	0.513595	0.00240794
ENSMUSG00000011658	Fuz	0.513872	0.00289869
ENSMUSG00000026820	Ptges2	0.514188	0.00144042
ENSMUSG00000025264	Tsr2	0.514406	0.00292902
ENSMUSG00000041841	Rpl37	0.515185	0.00346147
ENSMUSG00000004383	Large1	0.517569	0.00797988
ENSMUSG00000040482	Dxo	0.517941	0.00872668
ENSMUSG00000031068	Glrx3	0.519148	0.000155346
ENSMUSG00000079037	Prnp	0.519193	0.000103061
ENSMUSG00000035960	Apex1	0.519379	0.0014788
ENSMUSG00000008373	Prpf31	0.520181	8.94561e-05
ENSMUSG00000019467	Arhgef25	0.52255	0.00706142
ENSMUSG00000026603	Smyd2	0.522581	0.00229768
ENSMUSG00000057137	Tmem140	0.522874	0.000553122
ENSMUSG00000018909	Arrb1	0.522947	0.000268212
ENSMUSG00000024844	Banf1	0.522949	3.22097e-05
ENSMUSG00000030410	Dmwd	0.52352	0.00316388
ENSMUSG00000068922	Msto1	0.52358	0.00299841
ENSMUSG00000019578	Ubxn6	0.52418	0.00026116
ENSMUSG00000045948	Mrps12	0.524939	0.00302897
ENSMUSG00000024952	Rps6ka4	0.525844	1.0845e-05
ENSMUSG00000031274	Col4a5	0.526994	0.00629523
ENSMUSG00000028793	Rnf19b	0.527383	0.000280785
ENSMUSG00000024346	Pfdn1	0.527587	0.00124231
ENSMUSG00000037805	Rpl10a	0.528107	0.000650783
ENSMUSG00000025287	Acot9	0.528375	0.00233737
ENSMUSG00000024338	Psmb8	0.530667	1.7862e-06
ENSMUSG00000020133	2310011J03Rik	0.531447	0.00496704
ENSMUSG00000035754	Wdr18	0.532051	0.000567154
ENSMUSG00000021025	Nfkbia	0.532144	8.74675e-06
ENSMUSG00000008668	Rps18	0.532462	0.00550009
ENSMUSG00000019054	Fis1	0.532538	0.000111125
ENSMUSG00000020828	Pld2	0.533131	0.000122565
ENSMUSG00000004929	Thop1	0.533214	0.00127183
ENSMUSG00000025225	Nfkb2	0.533775	0.000224984
ENSMUSG00000022965	Ifngr2	0.536006	0.000270311
ENSMUSG00000030780	BC017158	0.536074	0.00553907
ENSMUSG00000034108	Ccs	0.53693	0.00705758
ENSMUSG00000054920	Klhl5	0.537654	0.00964229
ENSMUSG00000053801	Grwd1	0.538118	0.00145393
ENSMUSG00000024981	Acsl5	0.538328	4.86303e-07
ENSMUSG00000027889	Ampd2	0.538615	6.16641e-05
ENSMUSG00000003573	Homer3	0.539112	0.000472369
ENSMUSG00000024963	Dnajc4	0.53975	0.00762316
ENSMUSG00000029463	Fam216a	0.539856	0.00646997
ENSMUSG00000002395	Use1	0.540349	0.000757258
ENSMUSG00000060803	Gstp1	0.541521	0.00268963
ENSMUSG00000007041	Clic1	0.541795	3.36265e-07
ENSMUSG00000002763	Pex6	0.54184	0.000109152
ENSMUSG00000039067	Psmd7	0.542022	3.75208e-05
ENSMUSG00000032288	Imp3	0.542283	0.000488225
ENSMUSG00000022544	Eef2kmt	0.543065	0.00848412
ENSMUSG00000026509	Capn2	0.544312	7.8968e-05
ENSMUSG00000001053	N4bp3	0.544545	0.000569934
ENSMUSG00000061979	Rcc1l	0.545305	0.0074373
ENSMUSG00000064345	mt-Nd2	0.545465	0.00265087
ENSMUSG00000052146	Rps10	0.545515	0.00228475
ENSMUSG00000049295	Zfp219	0.547137	0.000154168
ENSMUSG00000059518	Znhit1	0.547181	0.00161547
ENSMUSG00000038650	Rnh1	0.547788	8.34344e-05
ENSMUSG00000005087	Cd44	0.54807	1.42485e-05
ENSMUSG00000027613	Eif6	0.549873	0.000336232
ENSMUSG00000029406	Pitpnm2	0.550158	0.000332911
ENSMUSG00000029761	Cald1	0.550552	0.00386891
ENSMUSG00000031604	Msmo1	0.550579	0.00844304
ENSMUSG00000057411	Fam173a	0.551091	0.00686844
ENSMUSG00000031584	Gsr	0.551141	0.00600155
ENSMUSG00000035206	Sppl2b	0.551151	0.000551159
ENSMUSG00000023206	Il15ra	0.551479	0.000481719
ENSMUSG00000053581	Zfand2a	0.551843	0.000344343
ENSMUSG00000026641	Usf1	0.552059	0.000186932
ENSMUSG00000039461	Tcta	0.552212	0.00739973
ENSMUSG00000031813	Mvb12a	0.552675	0.00262215
ENSMUSG00000015619	Gata3	0.553957	0.00231734
ENSMUSG00000028101	Pias3	0.554605	0.000727725
ENSMUSG00000006019	Dhx34	0.555493	0.00531536
ENSMUSG00000044533	Rps2	0.555594	0.00176018
ENSMUSG00000000740	Rpl13	0.555874	6.40952e-07
ENSMUSG00000031897	Psmb10	0.555974	4.85856e-06
ENSMUSG00000026944	Abca2	0.556976	3.83002e-07
ENSMUSG00000039263	Npepl1	0.557428	0.000231367
ENSMUSG00000020156	Mum1	0.558776	0.00124646
ENSMUSG00000042660	Wdr55	0.559094	0.00140178
ENSMUSG00000019362	D8Ertd738e	0.559991	0.00026051
ENSMUSG00000024309	Pfdn6	0.560138	0.000987489
ENSMUSG00000040414	Slc25a28	0.560168	0.000356153
ENSMUSG00000044709	Gemin7	0.560402	0.0035347
ENSMUSG00000022018	Rgcc	0.561345	0.00528066
ENSMUSG00000024644	Cndp2	0.561612	0.00406894
ENSMUSG00000019846	Lama4	0.56211	0.00419201
ENSMUSG00000039457	Ppl	0.562796	0.00164383
ENSMUSG00000038260	Trpm4	0.563632	0.00117539
ENSMUSG00000036661	Dennd3	0.563788	0.000787603
ENSMUSG00000040824	Snrpd2	0.56447	0.0018727
ENSMUSG00000015647	Lama5	0.566702	0.0039676
ENSMUSG00000028062	Lamtor2	0.566986	0.000810522
ENSMUSG00000002660	Clpp	0.567068	0.0031224
ENSMUSG00000041264	Uspl1	0.567548	2.01881e-05
ENSMUSG00000013539	Tango2	0.567699	0.00640413
ENSMUSG00000050002	Idnk	0.567947	0.00213762
ENSMUSG00000036752	Tubb4b	0.568807	3.55188e-11
ENSMUSG00000022571	Pycrl	0.571803	0.00262782
ENSMUSG00000065979	Cpped1	0.572227	1.86307e-06
ENSMUSG00000040918	Slc19a2	0.572591	0.00109348
ENSMUSG00000063457	Rps15	0.572838	3.68189e-05
ENSMUSG00000023143	Nagpa	0.573114	0.00640645
ENSMUSG00000008136	Fhl2	0.573438	0.000381629
ENSMUSG00000022560	Slc52a2	0.573999	0.00515776
ENSMUSG00000024902	Mrpl11	0.575411	0.00602498
ENSMUSG00000045312	Lhfpl2	0.575762	1.20222e-05
ENSMUSG00000030980	Knop1	0.576313	0.000344379
ENSMUSG00000006576	Slc4a3	0.577829	0.00142218
ENSMUSG00000079435	Rpl36a	0.578068	2.32287e-06
ENSMUSG00000075254	Heg1	0.57811	9.77239e-05
ENSMUSG00000042178	Armc5	0.579408	0.000817428
ENSMUSG00000026035	Ppil3	0.579433	0.0041525
ENSMUSG00000028041	Adam15	0.579577	3.23407e-05
ENSMUSG00000033020	Polr2f	0.579847	0.000829571
ENSMUSG00000034659	Tmem109	0.580944	5.54734e-05
ENSMUSG00000009291	Pttg1ip	0.581378	2.19172e-06
ENSMUSG00000053411	Cbx7	0.581716	9.25212e-05
ENSMUSG00000032198	Dock6	0.582404	0.000622461
ENSMUSG00000019822	Smpd2	0.584007	7.00195e-05
ENSMUSG00000081534	Slc48a1	0.58427	0.000615042
ENSMUSG00000006315	Tmem147	0.584618	0.00303721
ENSMUSG00000030826	Bcat2	0.584751	0.000894418
ENSMUSG00000067288	Rps28	0.58498	0.000707644
ENSMUSG00000020307	Cdc34	0.585035	2.55105e-06
ENSMUSG00000024914	Drap1	0.586265	8.28587e-05
ENSMUSG00000063605	Ccdc102a	0.58667	0.00607605
ENSMUSG00000002767	Mrpl2	0.586845	0.000220605
ENSMUSG00000035713	Usp35	0.587771	0.00133267
ENSMUSG00000044894	Uqcrq	0.587866	0.00670672
ENSMUSG00000039680	Mrps6	0.587986	0.00185927
ENSMUSG00000024925	Rnaseh2c	0.588618	0.00766315
ENSMUSG00000032966	Fkbp1a	0.589065	7.55046e-07
ENSMUSG00000010755	Cars	0.58912	0.000680651
ENSMUSG00000064068	Mtx1	0.589263	0.000180398
ENSMUSG00000027293	Ehd4	0.589351	2.76337e-06
ENSMUSG00000024194	Cuta	0.589364	0.000706263
ENSMUSG00000032333	Stoml1	0.590342	0.00851315
ENSMUSG00000064037	Gpn1	0.590677	0.0035505
ENSMUSG00000049643	2310022A10Rik	0.591058	0.00753349
ENSMUSG00000007837	Prrg2	0.592875	0.00122961
ENSMUSG00000020692	Nle1	0.594684	0.00480888
ENSMUSG00000022760	Thap7	0.595336	0.00429234
ENSMUSG00000029810	Tmem176b	0.595919	7.67842e-08
ENSMUSG00000038781	Stap2	0.595928	0.000392086
ENSMUSG00000022146	Osmr	0.597075	3.90704e-06
ENSMUSG00000031816	Mthfsd	0.597496	0.000610925
ENSMUSG00000046330	Rpl37a	0.597927	0.000195867
ENSMUSG00000022982	Sod1	0.602211	8.5838e-07
ENSMUSG00000025875	Tspan17	0.603094	0.0041525
ENSMUSG00000067787	Blcap	0.60457	4.73401e-06
ENSMUSG00000026240	Cops7b	0.605365	0.00777278
ENSMUSG00000031072	Oraov1	0.605599	0.00279937
ENSMUSG00000019261	Map1s	0.606679	0.00979066
ENSMUSG00000060032	H2afj	0.607198	0.00127098
ENSMUSG00000060260	Pwwp2b	0.60771	0.00384161
ENSMUSG00000024339	Tap2	0.608368	1.99345e-05
ENSMUSG00000033538	Casp4	0.609406	6.23875e-05
ENSMUSG00000033918	Parl	0.609442	0.000788764
ENSMUSG00000029392	Rilpl1	0.609809	0.00871047
ENSMUSG00000013846	St3gal1	0.610762	0.00030002
ENSMUSG00000060591	Ifitm2	0.611631	3.84362e-08
ENSMUSG00000083012	Fam220a	0.612454	0.00140099
ENSMUSG00000060601	Nr1h2	0.613797	3.42533e-05
ENSMUSG00000000326	Comt	0.616858	7.3003e-07
ENSMUSG00000020000	Moxd1	0.617903	0.00722184
ENSMUSG00000006095	Tbcb	0.618076	7.45672e-05
ENSMUSG00000025371	Chmp6	0.618175	3.50778e-05
ENSMUSG00000056612	Ppp1r14b	0.618337	0.00207992
ENSMUSG00000026796	Fam129b	0.618534	4.72573e-07
ENSMUSG00000026836	Acvr1	0.61982	4.48244e-05
ENSMUSG00000031521	Aga	0.620173	0.000330791
ENSMUSG00000035673	Sbno2	0.621164	2.35218e-06
ENSMUSG00000031807	Pgls	0.622026	0.000260274
ENSMUSG00000021756	Il6st	0.62267	2.31622e-08
ENSMUSG00000026181	Ppm1f	0.624189	5.1758e-06
ENSMUSG00000001036	Epn2	0.626296	0.000796775
ENSMUSG00000006800	Sulf2	0.626532	3.25052e-06
ENSMUSG00000061731	Ext1	0.626687	0.000125953
ENSMUSG00000041939	Mvk	0.62858	0.00950596
ENSMUSG00000031749	St3gal2	0.628764	0.00250287
ENSMUSG00000061787	Rps17	0.629065	1.65987e-05
ENSMUSG00000001844	Zdhhc4	0.629107	0.000223843
ENSMUSG00000006403	Adamts4	0.630006	0.0021072
ENSMUSG00000024436	Mrps18b	0.630883	8.02114e-05
ENSMUSG00000001056	Nhp2	0.631275	0.000169948
ENSMUSG00000041035	Gm17018	0.631946	0.000151119
ENSMUSG00000022193	Psmb5	0.632723	0.000676863
ENSMUSG00000023020	Cox14	0.633334	0.00320005
ENSMUSG00000032875	Arhgef17	0.633379	0.000440981
ENSMUSG00000025470	Zfp511	0.634324	0.00795808
ENSMUSG00000033467	Crlf2	0.634924	0.00396971
ENSMUSG00000031736	Crnde	0.63578	0.00432626
ENSMUSG00000028998	Tomm7	0.635983	0.00139775
ENSMUSG00000011837	Snapc2	0.636242	0.004074
ENSMUSG00000024158	Hagh	0.636447	0.000347815
ENSMUSG00000033819	Ppp1r16a	0.636965	0.000323243
ENSMUSG00000022475	Hdac7	0.637054	0.000201937
ENSMUSG00000013629	Cad	0.638677	0.000116226
ENSMUSG00000068735	Trp53i11	0.638857	0.00316388
ENSMUSG00000034321	Exosc1	0.639149	0.0039415
ENSMUSG00000020092	Pald1	0.639314	0.000214867
ENSMUSG00000033099	Nol12	0.639409	0.000584763
ENSMUSG00000034259	Exosc4	0.639507	0.00854397
ENSMUSG00000022476	Polr3h	0.640035	0.00242354
ENSMUSG00000016833	Mrps18c	0.640084	0.00471331
ENSMUSG00000029513	Prkab1	0.642701	1.75473e-06
ENSMUSG00000003531	Dgcr6	0.643	0.00597083
[truncated: 1,048 more rows]

## Sheet: gene sets - CTLs
Table S1D: Differentially expressed genes within annotated gene sets (CTLs)
ensembl ID	gene symbol	log2-fold change	Adjusted p-value
		(Irr vs Non-Irr)
Negative regulation of cytokine expression
ENSMUSG00000022033	Pbk	-1.24139	2.39585e-07
ENSMUSG00000056501	Cebpb	-0.753551	0.000132744
ENSMUSG00000028965	Tnfrsf9	-0.464841	6.09738e-05
ENSMUSG00000045827	Serpinb9	-0.411635	0.000878578
ENSMUSG00000026700	Tnfsf4	-0.392313	4.53354e-05
ENSMUSG00000027951	Adar	0.350108	0.00255812
ENSMUSG00000002897	Il17ra	0.367555	0.00422902
ENSMUSG00000031101	Sash3	0.549962	5.61388e-09
ENSMUSG00000026778	Prkcq	0.586361	1.04273e-06
ENSMUSG00000022508	Bcl6	0.590711	0.00161041
ENSMUSG00000024401	Tnf	0.711109	0.00244828
ENSMUSG00000015619	Gata3	0.7688	4.4681e-07
ENSMUSG00000013707	Tnfaip8l2	0.780477	1.39476e-05
ENSMUSG00000021356	Irf4	0.795881	2.41163e-06
ENSMUSG00000027985	Lef1	1.05729	8.90067e-06
ENSMUSG00000021678	F2rl1	1.12087	0.00260102
ENSMUSG00000055148	Klf2	1.21445	2.6771e-05
ENSMUSG00000039521	Foxp3	1.71968	1.04552e-09
ENSMUSG00000016529	Il10	1.85089	0.000508449
Chromatin remodeling
ENSMUSG00000019942	Cdk1	-0.925842	1.38592e-07
ENSMUSG00000041431	Ccnb1	-0.88128	4.63386e-06
ENSMUSG00000041064	Pif1	-0.872428	0.00348424
ENSMUSG00000047534	Mis18bp1	-0.838586	0.00040575
ENSMUSG00000026605	Cenpf	-0.828307	1.79708e-05
ENSMUSG00000031262	Cenpi	-0.807472	0.00190145
ENSMUSG00000017716	Birc5	-0.796369	1.36964e-05
ENSMUSG00000027306	Nusap1	-0.773148	4.84843e-05
ENSMUSG00000020897	Aurkb	-0.769941	5.76898e-05
ENSMUSG00000028933	Xrcc2	-0.757344	0.00432118
ENSMUSG00000051747	Ttn	-0.738388	0.00116058
ENSMUSG00000012483	Rpa3	-0.73838	0.00035874
ENSMUSG00000030528	Blm	-0.733578	0.00125785
ENSMUSG00000028312	Smc2	-0.73307	1.08744e-07
ENSMUSG00000042029	Ncapg2	-0.708076	1.80633e-05
ENSMUSG00000000028	Cdc45	-0.701966	0.00240328
ENSMUSG00000027323	Rad51	-0.693257	0.000372153
ENSMUSG00000015880	Ncapg	-0.684926	8.94801e-05
ENSMUSG00000017146	Brca1	-0.678281	0.000109046
ENSMUSG00000045328	Cenpe	-0.671427	0.000440866
ENSMUSG00000034329	Brip1	-0.669954	0.00102747
ENSMUSG00000020914	Top2a	-0.666702	1.85985e-05
ENSMUSG00000032113	Chek1	-0.661434	0.00112576
ENSMUSG00000041147	Brca2	-0.614619	0.00970138
ENSMUSG00000020649	Rrm2	-0.594247	0.000879346
ENSMUSG00000029177	Cenpa	-0.593956	5.09714e-06
ENSMUSG00000022142	Nup155	-0.593301	0.000226766
ENSMUSG00000025001	Hells	-0.586938	1.67282e-05
ENSMUSG00000036875	Dna2	-0.568735	0.00096737
ENSMUSG00000030978	Rrm1	-0.567548	0.000341673
ENSMUSG00000044783	Hjurp	-0.561673	0.00167409
ENSMUSG00000019982	Myb	-0.54977	0.00075246
ENSMUSG00000028873	Cdca8	-0.543771	0.00622665
ENSMUSG00000054717	Hmgb2	-0.542609	0.000111438
ENSMUSG00000039509	Nup133	-0.537253	0.00409923
ENSMUSG00000051329	Nup160	-0.509168	0.00327557
ENSMUSG00000002835	Chaf1a	-0.498327	0.00806145
ENSMUSG00000020739	Nup85	-0.488919	0.00533196
ENSMUSG00000035024	Ncapd3	-0.470837	0.00588266
ENSMUSG00000049932	H2afx	-0.460649	0.00970138
ENSMUSG00000024067	Dpy30	-0.441626	0.00555037
ENSMUSG00000004099	Dnmt1	-0.433951	0.00803815
ENSMUSG00000038759	Nup205	-0.426638	0.00307719
ENSMUSG00000038252	Ncapd2	-0.421463	0.00789591
ENSMUSG00000003226	Ranbp2	-0.377299	0.00232914
ENSMUSG00000066551	Hmgb1	-0.373591	0.00215216
ENSMUSG00000032481	Smarcc1	-0.31575	0.00899848
ENSMUSG00000029836	Cbx3	-0.28349	0.0039703
ENSMUSG00000020738	Sumo2	-0.283406	0.00271902
ENSMUSG00000025223	Ldb1	0.31521	0.00116473
ENSMUSG00000027936	Crtc2	0.324111	0.00877236
ENSMUSG00000033326	Kdm4a	0.329364	0.00993495
ENSMUSG00000021374	Nup153	0.329692	0.00845547
ENSMUSG00000055817	Mta3	0.336121	0.00591723
ENSMUSG00000053470	Kdm3a	0.347137	0.00195205
ENSMUSG00000040363	Bcor	0.380516	0.00999286
ENSMUSG00000019505	Ubb	0.394476	0.00280935
ENSMUSG00000026222	Sp100	0.421631	1.18918e-06
ENSMUSG00000024560	Cxxc1	0.422542	0.000482684
ENSMUSG00000056962	Jmjd6	0.429963	0.00120694
ENSMUSG00000039089	L3mbtl3	0.511658	0.00746257
ENSMUSG00000024193	Phf1	0.55037	0.000613989
ENSMUSG00000041187	Prkd2	0.552799	0.000123778
ENSMUSG00000047777	Phf13	0.577238	0.000112274
ENSMUSG00000022508	Bcl6	0.590711	0.00161041
ENSMUSG00000002625	Akap8l	0.609209	0.000486712
ENSMUSG00000039485	Tspyl4	0.649102	0.00103732
ENSMUSG00000008348	Ubc	0.705495	1.14779e-06
ENSMUSG00000041264	Uspl1	0.756223	2.99604e-09
ENSMUSG00000015619	Gata3	0.7688	4.4681e-07
ENSMUSG00000021356	Irf4	0.795881	2.41163e-06
ENSMUSG00000042207	Kdm5b	0.811088	0.00107311
ENSMUSG00000023927	Satb1	0.811192	2.15744e-07
ENSMUSG00000027985	Lef1	1.05729	8.90067e-06
ENSMUSG00000037868	Egr2	1.25027	1.12564e-06
ENSMUSG00000039521	Foxp3	1.71968	1.04552e-09
DNA replication and repair
ENSMUSG00000035455	Fignl1	-1.03801	2.59683e-05
ENSMUSG00000019942	Cdk1	-0.925842	1.38592e-07
ENSMUSG00000041431	Ccnb1	-0.88128	4.63386e-06
ENSMUSG00000028702	Rad54l	-0.880655	0.00102406
ENSMUSG00000041064	Pif1	-0.872428	0.00348424
ENSMUSG00000021569	Trip13	-0.840608	1.704e-05
ENSMUSG00000029910	Mad2l1	-0.832084	1.60621e-05
ENSMUSG00000001403	Ube2c	-0.831757	0.000264952
ENSMUSG00000026605	Cenpf	-0.828307	1.79708e-05
ENSMUSG00000027379	Bub1	-0.82721	2.07355e-05
ENSMUSG00000030867	Plk1	-0.813169	0.00037405
ENSMUSG00000034206	Polq	-0.77381	0.00102446
ENSMUSG00000020897	Aurkb	-0.769941	5.76898e-05
ENSMUSG00000058290	Espl1	-0.759307	6.59625e-06
ENSMUSG00000028933	Xrcc2	-0.757344	0.00432118
ENSMUSG00000022034	Esco2	-0.749223	0.00127938
ENSMUSG00000012483	Rpa3	-0.73838	0.00035874
ENSMUSG00000030528	Blm	-0.733578	0.00125785
ENSMUSG00000026622	Nek2	-0.710102	0.00103244
ENSMUSG00000000028	Cdc45	-0.701966	0.00240328
ENSMUSG00000034023	Fancd2	-0.694506	0.000939037
ENSMUSG00000027323	Rad51	-0.693257	0.000372153
ENSMUSG00000017146	Brca1	-0.678281	0.000109046
ENSMUSG00000039748	Exo1	-0.67678	0.00390414
ENSMUSG00000045328	Cenpe	-0.671427	0.000440866
ENSMUSG00000034329	Brip1	-0.669954	0.00102747
ENSMUSG00000040084	Bub1b	-0.668018	0.00044399
ENSMUSG00000020914	Top2a	-0.666702	1.85985e-05
ENSMUSG00000006715	Gmnn	-0.665697	0.00479902
ENSMUSG00000037544	Dlgap5	-0.66492	0.000892074
ENSMUSG00000032113	Chek1	-0.661434	0.00112576
ENSMUSG00000030677	Kif22	-0.650391	0.00877236
ENSMUSG00000067336	Bmpr2	-0.646024	0.00227686
ENSMUSG00000018362	Kpna2	-0.644489	5.94734e-06
ENSMUSG00000030254	Rad18	-0.644487	0.000385843
ENSMUSG00000029363	Rfc5	-0.643118	0.0001655
ENSMUSG00000026669	Mcm10	-0.628508	0.0045859
ENSMUSG00000007080	Pole	-0.627258	0.0052119
ENSMUSG00000032397	Tipin	-0.626817	0.000197576
ENSMUSG00000025747	Tyms	-0.62019	0.000471581
ENSMUSG00000020185	E2f7	-0.615238	0.00355426
ENSMUSG00000041147	Brca2	-0.614619	0.00970138
ENSMUSG00000032815	Fanca	-0.614312	0.00736676
ENSMUSG00000025574	Tk1	-0.613707	0.00103732
ENSMUSG00000031697	Orc6	-0.604575	0.000310697
ENSMUSG00000020649	Rrm2	-0.594247	0.000879346
ENSMUSG00000036781	Rps27l	-0.588502	0.00164768
ENSMUSG00000036875	Dna2	-0.568735	0.00096737
ENSMUSG00000030978	Rrm1	-0.567548	0.000341673
ENSMUSG00000027203	Dut	-0.550084	1.04119e-05
ENSMUSG00000019982	Myb	-0.54977	0.00075246
ENSMUSG00000028212	Ccne2	-0.542918	0.000339795
ENSMUSG00000054717	Hmgb2	-0.542609	0.000111438
ENSMUSG00000031403	Dkc1	-0.535677	0.00280935
ENSMUSG00000038679	Trps1	-0.532421	0.000699365
ENSMUSG00000002835	Chaf1a	-0.498327	0.00806145
ENSMUSG00000006678	Pola1	-0.491936	0.00803728
ENSMUSG00000028455	Stoml2	-0.473078	0.00508109
ENSMUSG00000049932	H2afx	-0.460649	0.00970138
ENSMUSG00000004099	Dnmt1	-0.433951	0.00803815
ENSMUSG00000037474	Dtl	-0.420407	0.00673388
ENSMUSG00000024742	Fen1	-0.411995	0.00615254
ENSMUSG00000026700	Tnfsf4	-0.392313	4.53354e-05
ENSMUSG00000039703	Nploc4	-0.390234	0.0076481
ENSMUSG00000066551	Hmgb1	-0.373591	0.00215216
ENSMUSG00000026914	Psmd14	-0.313682	0.00953627
ENSMUSG00000020738	Sumo2	-0.283406	0.00271902
ENSMUSG00000025162	Csnk1d	0.256977	0.00709566
ENSMUSG00000002147	Stat6	0.295671	0.00418898
ENSMUSG00000033326	Kdm4a	0.329364	0.00993495
ENSMUSG00000030122	Ptms	0.336199	0.00792861
ENSMUSG00000063268	Parp10	0.33673	0.00497909
ENSMUSG00000053470	Kdm3a	0.347137	0.00195205
ENSMUSG00000027951	Adar	0.350108	0.00255812
ENSMUSG00000029050	Ski	0.36346	0.00271451
ENSMUSG00000040363	Bcor	0.380516	0.00999286
ENSMUSG00000019505	Ubb	0.394476	0.00280935
ENSMUSG00000006127	Inpp5k	0.416685	0.00165657
ENSMUSG00000026222	Sp100	0.421631	1.18918e-06
ENSMUSG00000032596	Uba7	0.439897	0.00269225
ENSMUSG00000024193	Phf1	0.55037	0.000613989
ENSMUSG00000041187	Prkd2	0.552799	0.000123778
ENSMUSG00000035824	Tk2	0.575399	0.00275962
ENSMUSG00000026778	Prkcq	0.586361	1.04273e-06
ENSMUSG00000022508	Bcl6	0.590711	0.00161041
ENSMUSG00000002625	Akap8l	0.609209	0.000486712
ENSMUSG00000052684	Jun	0.666827	0.000366358
ENSMUSG00000008348	Ubc	0.705495	1.14779e-06
ENSMUSG00000015619	Gata3	0.7688	4.4681e-07
ENSMUSG00000003882	Il7r	0.880794	0.000643339
ENSMUSG00000000142	Axin2	0.902936	0.00216416
ENSMUSG00000027985	Lef1	1.05729	8.90067e-06
ENSMUSG00000059772	Slx1b	1.12563	1.87805e-06
ENSMUSG00000000782	Tcf7	1.44681	0.000925156
ENSMUSG00000039521	Foxp3	1.71968	1.04552e-09
ENSMUSG00000002324	Rec8	1.80076	0.000752174
ENSMUSG00000016529	Il10	1.85089	0.000508449
ENSMUSG00000091971	Hspa1a	2.75588	7.54691e-07
Cell division
ENSMUSG00000078566	Bnip3	-1.42722	6.46747e-06
ENSMUSG00000022033	Pbk	-1.24139	2.39585e-07
ENSMUSG00000041498	Kif14	-1.08612	5.27388e-08
ENSMUSG00000035299	Mid1	-1.06568	7.7673e-05
ENSMUSG00000035455	Fignl1	-1.03801	2.59683e-05
ENSMUSG00000040274	Cdk6	-1.00604	2.95634e-09
ENSMUSG00000002565	Scin	-0.976062	0.000181296
ENSMUSG00000033952	Aspm	-0.953374	7.85765e-09
ENSMUSG00000019845	Tube1	-0.946667	0.00699244
ENSMUSG00000019942	Cdk1	-0.925842	1.38592e-07
ENSMUSG00000021256	Vash1	-0.922572	0.00542329
ENSMUSG00000035683	Melk	-0.911724	0.000149889
ENSMUSG00000028068	Iqgap3	-0.906789	0.00146158
ENSMUSG00000020330	Hmmr	-0.902786	2.97175e-07
ENSMUSG00000027715	Ccna2	-0.886186	7.98845e-08
ENSMUSG00000041431	Ccnb1	-0.88128	4.63386e-06
ENSMUSG00000028702	Rad54l	-0.880655	0.00102406
ENSMUSG00000036777	Anln	-0.87914	2.88678e-05
ENSMUSG00000029516	Cit	-0.878353	1.24977e-05
ENSMUSG00000041064	Pif1	-0.872428	0.00348424
ENSMUSG00000026683	Nuf2	-0.872053	1.04119e-05
ENSMUSG00000005233	Spc25	-0.862823	0.000124582
ENSMUSG00000026779	Mastl	-0.843225	0.000223861
ENSMUSG00000021569	Trip13	-0.840608	1.704e-05
ENSMUSG00000047534	Mis18bp1	-0.838586	0.00040575
ENSMUSG00000029910	Mad2l1	-0.832084	1.60621e-05
ENSMUSG00000001403	Ube2c	-0.831757	0.000264952
ENSMUSG00000026605	Cenpf	-0.828307	1.79708e-05
ENSMUSG00000027379	Bub1	-0.82721	2.07355e-05
ENSMUSG00000030867	Plk1	-0.813169	0.00037405
ENSMUSG00000027699	Ect2	-0.809438	8.51305e-07
ENSMUSG00000031262	Cenpi	-0.807472	0.00190145
ENSMUSG00000024989	Cep55	-0.797902	5.76898e-05
ENSMUSG00000017716	Birc5	-0.796369	1.36964e-05
ENSMUSG00000054115	Skp2	-0.793174	0.0011723
ENSMUSG00000034206	Polq	-0.77381	0.00102446
ENSMUSG00000027306	Nusap1	-0.773148	4.84843e-05
ENSMUSG00000020897	Aurkb	-0.769941	5.76898e-05
ENSMUSG00000058290	Espl1	-0.759307	6.59625e-06
ENSMUSG00000028933	Xrcc2	-0.757344	0.00432118
ENSMUSG00000034926	Dhcr24	-0.753126	0.000643719
ENSMUSG00000002055	Spag5	-0.752411	0.000165364
ENSMUSG00000022034	Esco2	-0.749223	0.00127938
ENSMUSG00000025758	Plk4	-0.749006	3.67899e-05
ENSMUSG00000031004	Mki67	-0.746658	3.50817e-07
ENSMUSG00000051747	Ttn	-0.738388	0.00116058
ENSMUSG00000012483	Rpa3	-0.73838	0.00035874
ENSMUSG00000030528	Blm	-0.733578	0.00125785
ENSMUSG00000028312	Smc2	-0.73307	1.08744e-07
ENSMUSG00000029414	Kntc1	-0.721549	0.00133079
ENSMUSG00000026622	Nek2	-0.710102	0.00103244
ENSMUSG00000042029	Ncapg2	-0.708076	1.80633e-05
ENSMUSG00000028044	Cks1b	-0.706659	0.000307965
ENSMUSG00000000028	Cdc45	-0.701966	0.00240328
ENSMUSG00000034023	Fancd2	-0.694506	0.000939037
ENSMUSG00000027323	Rad51	-0.693257	0.000372153
ENSMUSG00000015880	Ncapg	-0.684926	8.94801e-05
ENSMUSG00000030268	Bcat1	-0.683103	0.000799114
ENSMUSG00000017146	Brca1	-0.678281	0.000109046
ENSMUSG00000039748	Exo1	-0.67678	0.00390414
ENSMUSG00000074476	Spc24	-0.672604	0.00746257
ENSMUSG00000045328	Cenpe	-0.671427	0.000440866
ENSMUSG00000034329	Brip1	-0.669954	0.00102747
ENSMUSG00000040084	Bub1b	-0.668018	0.00044399
ENSMUSG00000006398	Cdc20	-0.667031	0.00146875
ENSMUSG00000020914	Top2a	-0.666702	1.85985e-05
ENSMUSG00000006715	Gmnn	-0.665697	0.00479902
ENSMUSG00000037544	Dlgap5	-0.66492	0.000892074
ENSMUSG00000003779	Kif20a	-0.664308	0.000327935
ENSMUSG00000079553	Kifc1	-0.66274	0.00121183
ENSMUSG00000023004	Tuba1b	-0.662287	2.88678e-05
ENSMUSG00000032113	Chek1	-0.661434	0.00112576
ENSMUSG00000030677	Kif22	-0.650391	0.00877236
ENSMUSG00000037313	Tacc3	-0.645298	0.000263473
ENSMUSG00000018362	Kpna2	-0.644489	5.94734e-06
ENSMUSG00000030254	Rad18	-0.644487	0.000385843
ENSMUSG00000027469	Tpx2	-0.639913	1.79708e-05
ENSMUSG00000026669	Mcm10	-0.628508	0.0045859
ENSMUSG00000007080	Pole	-0.627258	0.0052119
ENSMUSG00000032397	Tipin	-0.626817	0.000197576
ENSMUSG00000025747	Tyms	-0.62019	0.000471581
ENSMUSG00000020185	E2f7	-0.615238	0.00355426
ENSMUSG00000041147	Brca2	-0.614619	0.00970138
ENSMUSG00000032815	Fanca	-0.614312	0.00736676
ENSMUSG00000029276	Glmn	-0.609352	0.00453381
ENSMUSG00000023505	Cdca3	-0.608585	0.000707472
ENSMUSG00000028718	Stil	-0.604684	0.00471158
ENSMUSG00000031697	Orc6	-0.604575	0.000310697
ENSMUSG00000028678	Kif2c	-0.59497	0.00975884
ENSMUSG00000020649	Rrm2	-0.594247	0.000879346
ENSMUSG00000029177	Cenpa	-0.593956	5.09714e-06
ENSMUSG00000036781	Rps27l	-0.588502	0.00164768
ENSMUSG00000025001	Hells	-0.586938	1.67282e-05
ENSMUSG00000032218	Ccnb2	-0.58585	0.00147788
ENSMUSG00000020715	Ern1	-0.57558	1.74399e-05
ENSMUSG00000022385	Gtse1	-0.573674	0.00790758
ENSMUSG00000036875	Dna2	-0.568735	0.00096737
ENSMUSG00000044783	Hjurp	-0.561673	0.00167409
ENSMUSG00000019982	Myb	-0.54977	0.00075246
ENSMUSG00000038943	Prc1	-0.547643	0.00293813
ENSMUSG00000028873	Cdca8	-0.543771	0.00622665
ENSMUSG00000057367	Birc2	-0.543305	1.21941e-05
ENSMUSG00000028212	Ccne2	-0.542918	0.000339795
ENSMUSG00000039509	Nup133	-0.537253	0.00409923
ENSMUSG00000031403	Dkc1	-0.535677	0.00280935
ENSMUSG00000033904	Ccp110	-0.534956	0.000246941
ENSMUSG00000038679	Trps1	-0.532421	0.000699365
ENSMUSG00000012443	Kif11	-0.531307	0.00197391
ENSMUSG00000036768	Kif15	-0.527236	0.000281074
ENSMUSG00000051412	Vamp7	-0.517541	0.0038095
ENSMUSG00000031197	Vbp1	-0.511836	6.13344e-05
ENSMUSG00000051329	Nup160	-0.509168	0.00327557
ENSMUSG00000024231	Cul2	-0.507523	0.000385878
ENSMUSG00000043091	Tuba1c	-0.506795	4.80402e-05
ENSMUSG00000068329	Htra2	-0.497914	0.00947135
ENSMUSG00000006678	Pola1	-0.491936	0.00803728
ENSMUSG00000020739	Nup85	-0.488919	0.00533196
ENSMUSG00000022369	Mtbp	-0.482801	0.00177976
ENSMUSG00000005732	Ranbp1	-0.481261	0.00830408
ENSMUSG00000024795	Kif20b	-0.472462	0.00118447
ENSMUSG00000035024	Ncapd3	-0.470837	0.00588266
ENSMUSG00000058013	Sept11	-0.466254	0.000303338
ENSMUSG00000049932	H2afx	-0.460649	0.00970138
ENSMUSG00000036752	Tubb4b	-0.454777	0.000262817
ENSMUSG00000038482	Tfdp1	-0.445274	0.00553877
ENSMUSG00000027087	Itgav	-0.436346	4.41813e-05
ENSMUSG00000004099	Dnmt1	-0.433951	0.00803815
ENSMUSG00000029430	Ran	-0.430304	0.00333515
ENSMUSG00000026229	Psmd1	-0.430106	0.00256706
ENSMUSG00000038252	Ncapd2	-0.421463	0.00789591
ENSMUSG00000037474	Dtl	-0.420407	0.00673388
ENSMUSG00000027601	Mtfr1	-0.417067	0.00981446
ENSMUSG00000026700	Tnfsf4	-0.392313	4.53354e-05
ENSMUSG00000004266	Ptpn6	-0.38194	0.00500898
ENSMUSG00000031328	Flna	-0.377936	0.000699365
ENSMUSG00000003226	Ranbp2	-0.377299	0.00232914
ENSMUSG00000029246	Ppat	-0.365481	0.00915893
ENSMUSG00000039067	Psmd7	-0.363027	0.0099046
ENSMUSG00000060860	Ube2s	-0.35608	0.00971108
ENSMUSG00000023845	Lnpep	-0.349998	0.00798641
ENSMUSG00000020326	Ccng1	-0.317292	0.00312074
ENSMUSG00000032481	Smarcc1	-0.31575	0.00899848
ENSMUSG00000026914	Psmd14	-0.313682	0.00953627
ENSMUSG00000037933	Bicd2	-0.312757	0.00540293
ENSMUSG00000032050	Rdx	-0.310028	0.00483801
ENSMUSG00000020849	Ywhae	-0.30981	0.00398554
ENSMUSG00000020368	Canx	-0.305863	0.00979306
ENSMUSG00000020738	Sumo2	-0.283406	0.00271902
ENSMUSG00000025162	Csnk1d	0.256977	0.00709566
ENSMUSG00000018899	Irf1	0.284181	0.00531839
ENSMUSG00000002147	Stat6	0.295671	0.00418898
ENSMUSG00000024381	Bin1	0.304196	0.00762491
ENSMUSG00000033326	Kdm4a	0.329364	0.00993495
ENSMUSG00000021374	Nup153	0.329692	0.00845547
ENSMUSG00000040479	Dgkz	0.33102	7.62449e-05
ENSMUSG00000000486	Sept1	0.335842	0.000777338
ENSMUSG00000063268	Parp10	0.33673	0.00497909
ENSMUSG00000053470	Kdm3a	0.347137	0.00195205
ENSMUSG00000027951	Adar	0.350108	0.00255812
ENSMUSG00000050379	Sept6	0.35926	0.000531342
ENSMUSG00000029050	Ski	0.36346	0.00271451
ENSMUSG00000040363	Bcor	0.380516	0.00999286
ENSMUSG00000028821	Syf2	0.385159	0.000963929
ENSMUSG00000019505	Ubb	0.394476	0.00280935
ENSMUSG00000038976	Ppp1r9b	0.398425	0.000336983
ENSMUSG00000045374	Wdr81	0.411142	0.00915893
ENSMUSG00000006127	Inpp5k	0.416685	0.00165657
ENSMUSG00000026222	Sp100	0.421631	1.18918e-06
ENSMUSG00000029385	Ccng2	0.422514	0.00115877
ENSMUSG00000033016	Nfatc1	0.448074	5.87926e-05
ENSMUSG00000045817	Zfp36l2	0.452872	0.00556781
ENSMUSG00000029513	Prkab1	0.464413	0.0081699
ENSMUSG00000042903	Foxo4	0.470368	0.00471158
ENSMUSG00000018572	Phf23	0.487143	2.1561e-05
ENSMUSG00000025880	Smad7	0.488875	4.77967e-05
ENSMUSG00000048878	Hexim1	0.510956	0.000453819
ENSMUSG00000024014	Pim1	0.517781	0.00346736
ENSMUSG00000014470	Rnf166	0.526514	8.84293e-05
ENSMUSG00000036432	Siah2	0.540776	0.000341673
ENSMUSG00000040435	Ppp1r15a	0.550316	0.00168481
ENSMUSG00000024193	Phf1	0.55037	0.000613989
ENSMUSG00000041187	Prkd2	0.552799	0.000123778
ENSMUSG00000078429	Ctdsp2	0.564163	1.74399e-05
ENSMUSG00000031539	Ap3m2	0.574371	0.00439949
ENSMUSG00000019970	Sgk1	0.576641	0.00552519
ENSMUSG00000030852	Tacc2	0.576773	0.000907447
ENSMUSG00000028793	Rnf19b	0.577003	0.000262087
ENSMUSG00000047777	Phf13	0.577238	0.000112274
ENSMUSG00000024975	Pdcd4	0.581963	2.95634e-09
ENSMUSG00000040746	Rnf167	0.583167	8.86689e-05
ENSMUSG00000026778	Prkcq	0.586361	1.04273e-06
ENSMUSG00000022508	Bcl6	0.590711	0.00161041
ENSMUSG00000025408	Ddit3	0.591469	0.00246312
ENSMUSG00000040957	Cables1	0.604843	0.00103236
ENSMUSG00000002625	Akap8l	0.609209	0.000486712
ENSMUSG00000028756	Pink1	0.618961	0.00943739
ENSMUSG00000030720	Cln3	0.619775	0.000937919
ENSMUSG00000048756	Foxo3	0.621753	0.00999286
ENSMUSG00000039910	Cited2	0.664955	0.000612624
ENSMUSG00000031155	Pim2	0.669825	7.07746e-06
ENSMUSG00000008348	Ubc	0.705495	1.14779e-06
ENSMUSG00000024401	Tnf	0.711109	0.00244828
ENSMUSG00000020205	Phlda1	0.71327	2.8428e-05
ENSMUSG00000021270	Hsp90aa1	0.719196	9.37045e-06
ENSMUSG00000029726	Mepce	0.757901	7.78822e-07
ENSMUSG00000015619	Gata3	0.7688	4.4681e-07
ENSMUSG00000053581	Zfand2a	0.793191	0.000209743
ENSMUSG00000002996	Hbp1	0.797513	6.19134e-09
ENSMUSG00000038418	Egr1	0.830088	4.00861e-07
ENSMUSG00000052302	Tbc1d30	0.839947	0.00966809
ENSMUSG00000003882	Il7r	0.880794	0.000643339
ENSMUSG00000000142	Axin2	0.902936	0.00216416
ENSMUSG00000033083	Tbc1d4	0.991251	7.34456e-07
ENSMUSG00000023009	Nckap5l	1.05692	0.00063685
ENSMUSG00000027985	Lef1	1.05729	8.90067e-06
ENSMUSG00000021678	F2rl1	1.12087	0.00260102
ENSMUSG00000059772	Slx1b	1.12563	1.87805e-06
ENSMUSG00000038393	Txnip	1.15368	1.84814e-15
ENSMUSG00000045092	S1pr1	1.36183	0.000449883
ENSMUSG00000039521	Foxp3	1.71968	1.04552e-09
ENSMUSG00000002324	Rec8	1.80076	0.000752174
ENSMUSG00000016529	Il10	1.85089	0.000508449
ENSMUSG00000091971	Hspa1a	2.75588	7.54691e-07

## Sheet: gene sets - hematopoietic cells
Table S1E: Differentially expressed genes within annotated gene sets (Hematopoietic cells)
ensembl ID	gene symbol	log2-fold change	Adjusted p-value
		(Irr vs Non-Irr)
Vasculogenesis
ENSMUSG00000030849	Fgfr2	-1.88577	0.000559652
ENSMUSG00000013584	Aldh1a2	-1.70408	0.00407784
ENSMUSG00000016942	Tmprss6	-1.68459	0.000580014
ENSMUSG00000041431	Ccnb1	-1.44023	9.58023e-05
ENSMUSG00000020185	E2f7	-1.21907	0.000155953
ENSMUSG00000046179	E2f8	-1.14629	1.46355e-08
ENSMUSG00000019942	Cdk1	-1.1439	8.66095e-07
ENSMUSG00000017146	Brca1	-1.10349	5.26993e-08
ENSMUSG00000028068	Iqgap3	-1.03384	1.64073e-05
ENSMUSG00000040274	Cdk6	-0.835555	1.40474e-05
ENSMUSG00000032487	Ptgs2	-0.833961	1.63103e-05
ENSMUSG00000028864	Hgf	-0.737948	1.02336e-07
ENSMUSG00000023951	Vegfa	-0.680498	0.001771
ENSMUSG00000052889	Prkcb	-0.642022	0.000480841
ENSMUSG00000061436	Hipk2	-0.60991	0.000733522
ENSMUSG00000033792	Atp7a	-0.591799	0.000142693
ENSMUSG00000075470	Deaf1	-0.589626	0.00140362
ENSMUSG00000028341	Nr4a3	-0.559026	0.000163763
ENSMUSG00000054717	Hmgb2	-0.554194	7.38938e-06
ENSMUSG00000041235	Chd7	-0.474964	0.000741638
ENSMUSG00000057329	Bcl2	-0.455001	0.00903786
ENSMUSG00000034640	Tiparp	-0.420291	0.00124963
ENSMUSG00000019920	Lims1	-0.417558	4.66793e-05
ENSMUSG00000005672	Kit	-0.417098	0.00854327
ENSMUSG00000070327	Rnf213	-0.411495	1.78522e-05
ENSMUSG00000027087	Itgav	-0.381766	0.00737438
ENSMUSG00000062232	Rapgef2	-0.368498	0.000147019
ENSMUSG00000030536	Iqgap1	-0.353195	1.51218e-05
ENSMUSG00000031987	Egln1	-0.351283	0.00439891
ENSMUSG00000022443	Myh9	-0.344063	0.000142916
ENSMUSG00000025810	Nrp1	-0.343162	0.00874903
ENSMUSG00000025473	Adam8	-0.330855	0.00356391
ENSMUSG00000020715	Ern1	-0.30927	0.00933176
ENSMUSG00000040552	C3ar1	-0.295629	0.00974502
ENSMUSG00000037242	Clic4	-0.291274	0.0055519
ENSMUSG00000035042	Ccl5	-0.284115	0.00277648
ENSMUSG00000025809	Itgb1	-0.253447	0.00345655
ENSMUSG00000003873	Bax	0.334517	0.00538586
ENSMUSG00000006800	Sulf2	0.371463	0.000484764
ENSMUSG00000023905	Tnfrsf12a	0.503285	0.00678519
ENSMUSG00000038418	Egr1	0.524117	0.00150949
ENSMUSG00000021127	Zfp36l1	0.525869	7.22534e-07
ENSMUSG00000022528	Hes1	0.581045	0.000574566
ENSMUSG00000052684	Jun	0.655717	1.03381e-07
ENSMUSG00000029484	Anxa3	0.657932	0.000477157
ENSMUSG00000005413	Hmox1	0.678219	1.11904e-10
ENSMUSG00000031740	Mmp2	0.680579	9.89725e-05
ENSMUSG00000001761	Smo	0.700488	0.00656831
ENSMUSG00000006445	Epha2	0.769568	2.2712e-05
ENSMUSG00000015619	Gata3	0.830443	0.000134327
ENSMUSG00000034041	Lyl1	0.837138	2.75812e-05
ENSMUSG00000031502	Col4a1	0.857517	9.04368e-05
ENSMUSG00000052911	Lamb2	0.883989	0.00108644
ENSMUSG00000020154	Ptprb	0.885694	0.00940384
ENSMUSG00000025151	Maged1	0.916524	0.000171927
ENSMUSG00000002985	Apoe	0.918235	1.00572e-18
ENSMUSG00000026883	Dab2ip	0.93356	4.36501e-05
ENSMUSG00000022607	Ptk2	0.947267	0.00425176
ENSMUSG00000031503	Col4a2	0.978137	2.32773e-06
ENSMUSG00000021796	Bmpr1a	1.00768	0.000331353
ENSMUSG00000001870	Ltbp1	1.10522	0.000683898
ENSMUSG00000029373	Pf4	1.10655	0.00321142
ENSMUSG00000019987	Arg1	1.12035	2.04963e-05
ENSMUSG00000027803	Wwtr1	1.14535	0.000394311
ENSMUSG00000029710	Ephb4	1.15749	0.000394749
ENSMUSG00000038146	Notch3	1.16066	3.17336e-05
ENSMUSG00000030770	Parva	1.17005	2.03928e-05
ENSMUSG00000005958	Ephb3	1.17513	0.000587243
ENSMUSG00000050953	Gja1	1.21001	2.08444e-06
ENSMUSG00000032135	Mcam	1.23309	1.56234e-07
ENSMUSG00000030605	Mfge8	1.30918	0.00947435
ENSMUSG00000031871	Cdh5	1.36154	1.50021e-08
ENSMUSG00000000753	Serpinf1	1.37159	0.000707531
ENSMUSG00000002900	Lamb1	1.40048	1.92969e-06
ENSMUSG00000017724	Etv4	1.41055	0.00451927
ENSMUSG00000023972	Ptk7	1.41917	1.27742e-06
ENSMUSG00000037095	Lrg1	1.44921	1.23678e-05
ENSMUSG00000031955	Bcar1	1.45516	3.47571e-06
ENSMUSG00000029859	Epha1	1.46417	0.00509139
ENSMUSG00000001435	Col18a1	1.50584	9.94518e-10
ENSMUSG00000020937	Plcd3	1.50775	0.0026518
ENSMUSG00000022548	Apod	1.51224	7.58791e-05
ENSMUSG00000027954	Efna1	1.51259	0.00212227
ENSMUSG00000025608	Podxl	1.5179	7.14355e-06
ENSMUSG00000028763	Hspg2	1.52836	6.7308e-08
ENSMUSG00000001672	Marveld3	1.52955	0.00239486
ENSMUSG00000051159	Cited1	1.53799	0.000824111
ENSMUSG00000062312	Erbb2	1.57477	9.86234e-07
ENSMUSG00000028128	F3	1.59137	5.68893e-09
ENSMUSG00000015647	Lama5	1.60919	0.000287537
ENSMUSG00000031520	Vegfc	1.65239	0.00121917
ENSMUSG00000016494	Cd34	1.73294	2.13723e-05
ENSMUSG00000004951	Hspb1	1.75195	9.96463e-12
ENSMUSG00000067006	Serpinb5	1.76239	1.41346e-06
ENSMUSG00000061353	Cxcl12	1.77507	1.98144e-05
ENSMUSG00000031778	Cx3cl1	1.77789	0.000409132
ENSMUSG00000031548	Sfrp1	1.7854	1.22867e-06
ENSMUSG00000031558	Slit2	1.82437	0.000505522
ENSMUSG00000022505	Emp2	1.83025	6.99972e-13
ENSMUSG00000033191	Tie1	1.9235	5.05272e-06
ENSMUSG00000046470	Sox18	2.00686	0.00980016
ENSMUSG00000001240	Ramp2	2.09208	0.00292872
ENSMUSG00000026921	Egfl7	2.2231	4.57702e-06
ENSMUSG00000046186	Cd109	2.26955	4.05647e-06
ENSMUSG00000028978	Nos3	2.30692	0.00336263
ENSMUSG00000006386	Tek	2.30932	0.0086302
ENSMUSG00000007655	Cav1	2.36901	2.64991e-16
ENSMUSG00000032125	Robo4	2.39162	6.9822e-06
ENSMUSG00000021702	Thbs4	2.51392	0.00147401
ENSMUSG00000022367	Has2	2.52015	0.00065209
ENSMUSG00000041445	Mmrn2	2.61198	6.74264e-08
ENSMUSG00000024713	Pcsk5	2.62876	0.00405123
ENSMUSG00000029661	Col1a2	2.67499	0.00449784
ENSMUSG00000073599	Ecscr	2.76436	5.61083e-10
ENSMUSG00000001506	Col1a1	2.83174	0.00235368
ENSMUSG00000036856	Wnt4	2.9132	1.14515e-06
ENSMUSG00000019929	Dcn	2.99528	1.18843e-17
ENSMUSG00000004655	Aqp1	3.01276	7.60033e-21
ENSMUSG00000030043	Tacr1	3.12338	3.83322e-05
ENSMUSG00000060188	Cxcl17	4.29625	9.60307e-08
Cell migration
ENSMUSG00000033831	Fgb	-4.53583	0.000185259
ENSMUSG00000031551	Ido1	-3.57318	1.8601e-08
ENSMUSG00000016942	Tmprss6	-1.68459	0.000580014
ENSMUSG00000036777	Anln	-1.18719	6.71364e-07
ENSMUSG00000022033	Pbk	-1.1139	0.00325654
ENSMUSG00000078566	Bnip3	-1.05753	2.04378e-11
ENSMUSG00000026700	Tnfsf4	-1.02751	7.23197e-05
ENSMUSG00000015568	Lpl	-1.01525	1.69293e-09
ENSMUSG00000051379	Flrt3	-0.963977	0.00029969
ENSMUSG00000032487	Ptgs2	-0.833961	1.63103e-05
ENSMUSG00000028864	Hgf	-0.737948	1.02336e-07
ENSMUSG00000024795	Kif20b	-0.691782	0.00029896
ENSMUSG00000023951	Vegfa	-0.680498	0.001771
ENSMUSG00000052270	Fpr2	-0.643465	0.00241138
ENSMUSG00000027009	Itga4	-0.609331	4.06008e-05
ENSMUSG00000030257	Srgap3	-0.596224	0.00323673
ENSMUSG00000021624	Cd180	-0.573255	0.000650908
ENSMUSG00000020189	Osbpl8	-0.56817	1.35363e-05
ENSMUSG00000028341	Nr4a3	-0.559026	0.000163763
ENSMUSG00000054717	Hmgb2	-0.554194	7.38938e-06
ENSMUSG00000025161	Slc16a3	-0.544603	4.94232e-05
ENSMUSG00000044447	Dock5	-0.52678	0.00501786
ENSMUSG00000042082	Arsb	-0.522454	4.02922e-05
ENSMUSG00000045322	Tlr9	-0.505539	3.83322e-05
ENSMUSG00000027111	Itga6	-0.486674	0.00260939
ENSMUSG00000028228	Cpne3	-0.477963	0.000154048
ENSMUSG00000019726	Lyst	-0.476474	0.00974898
ENSMUSG00000035954	Dock4	-0.475318	0.000128678
ENSMUSG00000054693	Adam10	-0.470128	0.00118564
ENSMUSG00000051457	Spn	-0.464605	0.00316777
ENSMUSG00000043940	Wdfy3	-0.459885	0.00111388
ENSMUSG00000057329	Bcl2	-0.455001	0.00903786
ENSMUSG00000052085	Dock8	-0.427386	0.000319194
ENSMUSG00000021451	Sema4d	-0.423404	0.00081919
ENSMUSG00000005672	Kit	-0.417098	0.00854327
ENSMUSG00000029826	Zc3hav1	-0.400328	9.66142e-05
ENSMUSG00000022180	Slc7a8	-0.388226	7.62706e-05
ENSMUSG00000027087	Itgav	-0.381766	0.00737438
ENSMUSG00000062232	Rapgef2	-0.368498	0.000147019
ENSMUSG00000030830	Itgal	-0.357128	0.000910214
ENSMUSG00000025314	Ptprj	-0.353	0.00474272
ENSMUSG00000024079	Eif2ak2	-0.351086	0.000538876
ENSMUSG00000026872	Zeb2	-0.349288	0.00370971
ENSMUSG00000006740	Kif5b	-0.345621	0.0019697
ENSMUSG00000020594	Pum2	-0.344181	0.00159586
ENSMUSG00000022443	Myh9	-0.344063	0.000142916
ENSMUSG00000025810	Nrp1	-0.343162	0.00874903
ENSMUSG00000020143	Dock2	-0.340631	0.00352417
ENSMUSG00000025473	Adam8	-0.330855	0.00356391
ENSMUSG00000027852	Nras	-0.330122	0.00478906
ENSMUSG00000004040	Stat3	-0.302383	0.00138313
ENSMUSG00000026395	Ptprc	-0.300522	0.00209981
ENSMUSG00000040552	C3ar1	-0.295629	0.00974502
ENSMUSG00000037242	Clic4	-0.291274	0.0055519
ENSMUSG00000031555	Adam9	-0.287141	0.00893496
ENSMUSG00000035042	Ccl5	-0.284115	0.00277648
ENSMUSG00000030530	Furin	-0.28102	0.00468319
ENSMUSG00000000275	Trim25	-0.267628	0.00614672
ENSMUSG00000025809	Itgb1	-0.253447	0.00345655
ENSMUSG00000018572	Phf23	0.36175	0.00281772
ENSMUSG00000018930	Ccl4	0.398592	0.00245616
ENSMUSG00000040952	Rps19	0.444953	8.56329e-06
ENSMUSG00000060591	Ifitm2	0.569323	0.00168438
ENSMUSG00000033542	Arhgef5	0.634819	0.00363317
ENSMUSG00000032366	Tpm1	0.635788	0.00189301
ENSMUSG00000041954	Tnfrsf18	0.644468	0.00279399
ENSMUSG00000024401	Tnf	0.648572	2.047e-05
ENSMUSG00000058427	Cxcl2	0.652607	1.64256e-06
ENSMUSG00000052684	Jun	0.655717	1.03381e-07
ENSMUSG00000029484	Anxa3	0.657932	0.000477157
ENSMUSG00000038260	Trpm4	0.67178	0.00791376
ENSMUSG00000005413	Hmox1	0.678219	1.11904e-10
ENSMUSG00000039521	Foxp3	0.682294	0.00401983
ENSMUSG00000024659	Anxa1	0.693341	0.000467972
ENSMUSG00000001761	Smo	0.700488	0.00656831
ENSMUSG00000006445	Epha2	0.769568	2.2712e-05
ENSMUSG00000045394	Epcam	0.798764	0.00336263
ENSMUSG00000016529	Il10	0.802127	7.77019e-05
ENSMUSG00000027750	Postn	0.808583	8.58861e-05
ENSMUSG00000025491	Ifitm1	0.82327	0.00105111
ENSMUSG00000015619	Gata3	0.830443	0.000134327
ENSMUSG00000041845	Rhod	0.854567	0.00328154
ENSMUSG00000052911	Lamb2	0.883989	0.00108644
ENSMUSG00000002985	Apoe	0.918235	1.00572e-18
ENSMUSG00000019194	Scn1b	0.9206	0.00974898
ENSMUSG00000026883	Dab2ip	0.93356	4.36501e-05
ENSMUSG00000022607	Ptk2	0.947267	0.00425176
ENSMUSG00000001507	Itga3	0.952385	1.29956e-06
ENSMUSG00000014599	Csf1	1.00711	1.10647e-05
ENSMUSG00000004864	Mapk13	1.06921	0.00257412
ENSMUSG00000074227	Spint2	1.07577	4.02568e-09
ENSMUSG00000022865	Cxadr	1.0777	0.000191578
ENSMUSG00000040447	Spns2	1.08041	0.000134327
ENSMUSG00000029373	Pf4	1.10655	0.00321142
ENSMUSG00000029710	Ephb4	1.15749	0.000394749
ENSMUSG00000030770	Parva	1.17005	2.03928e-05
ENSMUSG00000005958	Ephb3	1.17513	0.000587243
ENSMUSG00000030281	Il17rc	1.17866	0.00625919
ENSMUSG00000042821	Snai1	1.1974	0.000369597
ENSMUSG00000050953	Gja1	1.21001	2.08444e-06
ENSMUSG00000032135	Mcam	1.23309	1.56234e-07
ENSMUSG00000020902	Ntn1	1.24003	2.2627e-05
ENSMUSG00000031451	Gas6	1.2737	3.7476e-07
ENSMUSG00000008601	Rab25	1.31253	0.000390673
ENSMUSG00000053646	Plxnb1	1.32625	2.17901e-06
ENSMUSG00000056071	S100a9	1.3513	4.70915e-17
ENSMUSG00000000753	Serpinf1	1.37159	0.000707531
ENSMUSG00000021745	Ptprg	1.37504	0.000872788
ENSMUSG00000020427	Igfbp3	1.37892	1.14821e-06
ENSMUSG00000002900	Lamb1	1.40048	1.92969e-06
ENSMUSG00000017724	Etv4	1.41055	0.00451927
ENSMUSG00000017737	Mmp9	1.41088	2.02856e-09
ENSMUSG00000017446	C1qtnf1	1.43209	5.81509e-05
ENSMUSG00000026180	Cxcr2	1.43668	1.08563e-07
ENSMUSG00000009185	Ccl8	1.45452	0.00023589
ENSMUSG00000031955	Bcar1	1.45516	3.47571e-06
ENSMUSG00000029859	Epha1	1.46417	0.00509139
ENSMUSG00000027832	Ptx3	1.46856	0.00681858
ENSMUSG00000056054	S100a8	1.49304	4.65542e-12
ENSMUSG00000001435	Col18a1	1.50584	9.94518e-10
ENSMUSG00000022146	Osmr	1.50661	1.02697e-07
ENSMUSG00000026249	Serpine2	1.51076	4.41003e-12
ENSMUSG00000022548	Apod	1.51224	7.58791e-05
ENSMUSG00000027954	Efna1	1.51259	0.00212227
ENSMUSG00000025608	Podxl	1.5179	7.14355e-06
ENSMUSG00000001672	Marveld3	1.52955	0.00239486
ENSMUSG00000022286	Grhl2	1.53841	2.09129e-05
ENSMUSG00000062312	Erbb2	1.57477	9.86234e-07
ENSMUSG00000028128	F3	1.59137	5.68893e-09
ENSMUSG00000015647	Lama5	1.60919	0.000287537
ENSMUSG00000031520	Vegfc	1.65239	0.00121917
ENSMUSG00000034684	Sema3f	1.65955	0.000104995
ENSMUSG00000016024	Lbp	1.71081	2.77779e-08
ENSMUSG00000016494	Cd34	1.73294	2.13723e-05
ENSMUSG00000021508	Cxcl14	1.74381	0.000704524
ENSMUSG00000023224	Serping1	1.74942	0.00489494
ENSMUSG00000004951	Hspb1	1.75195	9.96463e-12
ENSMUSG00000061353	Cxcl12	1.77507	1.98144e-05
ENSMUSG00000031778	Cx3cl1	1.77789	0.000409132
ENSMUSG00000041120	Nbl1	1.78371	0.000145573
ENSMUSG00000031548	Sfrp1	1.7854	1.22867e-06
ENSMUSG00000031558	Slit2	1.82437	0.000505522
ENSMUSG00000001946	Esam	1.82672	0.000484764
ENSMUSG00000022505	Emp2	1.83025	6.99972e-13
ENSMUSG00000089876	Tmem102	1.85155	0.00373903
ENSMUSG00000033191	Tie1	1.9235	5.05272e-06
ENSMUSG00000028909	Ptpru	1.9354	0.00315849
ENSMUSG00000008734	Gprc5b	1.9729	0.000573541
ENSMUSG00000053024	Cntn2	1.98185	0.00193144
ENSMUSG00000020810	Cygb	1.99666	0.00483443
ENSMUSG00000046470	Sox18	2.00686	0.00980016
ENSMUSG00000046186	Cd109	2.26955	4.05647e-06
ENSMUSG00000024810	Il33	2.28594	3.6516e-13
ENSMUSG00000034845	Plvap	2.2965	1.66608e-15
ENSMUSG00000028978	Nos3	2.30692	0.00336263
ENSMUSG00000006386	Tek	2.30932	0.0086302
ENSMUSG00000028600	Podn	2.33015	0.00128476
ENSMUSG00000006369	Fbln1	2.35526	3.44388e-05
ENSMUSG00000007655	Cav1	2.36901	2.64991e-16
ENSMUSG00000021702	Thbs4	2.51392	0.00147401
ENSMUSG00000022367	Has2	2.52015	0.00065209
ENSMUSG00000041445	Mmrn2	2.61198	6.74264e-08
ENSMUSG00000029661	Col1a2	2.67499	0.00449784
ENSMUSG00000026580	Selp	2.6854	4.94232e-05
ENSMUSG00000073599	Ecscr	2.76436	5.61083e-10
ENSMUSG00000001506	Col1a1	2.83174	0.00235368
ENSMUSG00000042453	Reln	2.91064	0.00130615
ENSMUSG00000036856	Wnt4	2.9132	1.14515e-06
ENSMUSG00000019929	Dcn	2.99528	1.18843e-17
ENSMUSG00000030043	Tacr1	3.12338	3.83322e-05
ENSMUSG00000030562	Nox4	3.37652	1.46907e-07
ENSMUSG00000060188	Cxcl17	4.29625	9.60307e-08
Tissue morphogenesis
ENSMUSG00000006269	Atp6v1b1	-2.88623	1.44101e-10
ENSMUSG00000047861	Foxi1	-1.88684	0.000852929
ENSMUSG00000030849	Fgfr2	-1.88577	0.000559652
ENSMUSG00000026605	Cenpf	-1.87984	7.66524e-11
ENSMUSG00000013584	Aldh1a2	-1.70408	0.00407784
ENSMUSG00000041498	Kif14	-1.63785	4.74616e-06
ENSMUSG00000038738	Shank1	-1.36794	0.000580014
ENSMUSG00000027966	Col11a1	-1.33306	0.00610175
ENSMUSG00000031004	Mki67	-1.25311	1.10906e-13
ENSMUSG00000028718	Stil	-1.13958	0.000142693
ENSMUSG00000051379	Flrt3	-0.963977	0.00029969
ENSMUSG00000027496	Aurka	-0.834413	0.00133146
ENSMUSG00000028832	Stmn1	-0.753408	0.000176854
ENSMUSG00000026826	Nr4a2	-0.753086	2.38912e-09
ENSMUSG00000028864	Hgf	-0.737948	1.02336e-07
ENSMUSG00000024795	Kif20b	-0.691782	0.00029896
ENSMUSG00000023951	Vegfa	-0.680498	0.001771
ENSMUSG00000061436	Hipk2	-0.60991	0.000733522
ENSMUSG00000027009	Itga4	-0.609331	4.06008e-05
ENSMUSG00000033792	Atp7a	-0.591799	0.000142693
ENSMUSG00000075470	Deaf1	-0.589626	0.00140362
ENSMUSG00000028341	Nr4a3	-0.559026	0.000163763
ENSMUSG00000040675	Mthfd1l	-0.551505	0.00542704
ENSMUSG00000039994	Timeless	-0.52935	0.00313226
ENSMUSG00000045322	Tlr9	-0.505539	3.83322e-05
ENSMUSG00000027111	Itga6	-0.486674	0.00260939
ENSMUSG00000005102	Eif2ak4	-0.482755	0.00170052
ENSMUSG00000040943	Tet2	-0.481827	8.43746e-05
ENSMUSG00000041235	Chd7	-0.474964	0.000741638
ENSMUSG00000032481	Smarcc1	-0.460013	0.00205546
ENSMUSG00000057329	Bcl2	-0.455001	0.00903786
ENSMUSG00000030557	Mef2a	-0.423443	0.00508659
ENSMUSG00000021451	Sema4d	-0.423404	0.00081919
ENSMUSG00000034640	Tiparp	-0.420291	0.00124963
ENSMUSG00000019920	Lims1	-0.417558	4.66793e-05
ENSMUSG00000021959	Lats2	-0.399622	0.00782519
ENSMUSG00000027087	Itgav	-0.381766	0.00737438
ENSMUSG00000027162	Lin7c	-0.3817	0.00571297
ENSMUSG00000019979	Apaf1	-0.377759	0.0046325
ENSMUSG00000005034	Prkacb	-0.375592	0.000779669
ENSMUSG00000027763	Mbnl1	-0.367769	0.000701732
ENSMUSG00000020647	Ncoa1	-0.362634	0.00242126
ENSMUSG00000030536	Iqgap1	-0.353195	1.51218e-05
ENSMUSG00000031987	Egln1	-0.351283	0.00439891
ENSMUSG00000026872	Zeb2	-0.349288	0.00370971
ENSMUSG00000006740	Kif5b	-0.345621	0.0019697
ENSMUSG00000022443	Myh9	-0.344063	0.000142916
ENSMUSG00000025810	Nrp1	-0.343162	0.00874903
ENSMUSG00000017485	Top2b	-0.332786	0.00520701
ENSMUSG00000024085	Man2a1	-0.331939	0.000638655
ENSMUSG00000027852	Nras	-0.330122	0.00478906
ENSMUSG00000027381	Bcl2l11	-0.306722	0.00566399
ENSMUSG00000040552	C3ar1	-0.295629	0.00974502
ENSMUSG00000037242	Clic4	-0.291274	0.0055519
ENSMUSG00000025809	Itgb1	-0.253447	0.00345655
ENSMUSG00000019505	Ubb	0.306442	0.000985951
ENSMUSG00000017009	Sdc4	0.312226	0.00119514
ENSMUSG00000003873	Bax	0.334517	0.00538586
ENSMUSG00000006800	Sulf2	0.371463	0.000484764
ENSMUSG00000038418	Egr1	0.524117	0.00150949
ENSMUSG00000021127	Zfp36l1	0.525869	7.22534e-07
ENSMUSG00000022528	Hes1	0.581045	0.000574566
ENSMUSG00000031995	St14	0.593315	0.00782519
ENSMUSG00000001288	Rarg	0.60653	0.000467972
ENSMUSG00000050578	Mmp13	0.630446	0.00106463
ENSMUSG00000032366	Tpm1	0.635788	0.00189301
ENSMUSG00000024401	Tnf	0.648572	2.047e-05
ENSMUSG00000052684	Jun	0.655717	1.03381e-07
ENSMUSG00000031740	Mmp2	0.680579	9.89725e-05
ENSMUSG00000024659	Anxa1	0.693341	0.000467972
ENSMUSG00000001761	Smo	0.700488	0.00656831
ENSMUSG00000006445	Epha2	0.769568	2.2712e-05
ENSMUSG00000003534	Ddr1	0.78086	0.0062471
ENSMUSG00000045394	Epcam	0.798764	0.00336263
ENSMUSG00000016529	Il10	0.802127	7.77019e-05
ENSMUSG00000027750	Postn	0.808583	8.58861e-05
ENSMUSG00000015619	Gata3	0.830443	0.000134327
ENSMUSG00000031502	Col4a1	0.857517	9.04368e-05
ENSMUSG00000040734	Ppp1r13l	0.873114	0.00370734
ENSMUSG00000052911	Lamb2	0.883989	0.00108644
ENSMUSG00000025151	Maged1	0.916524	0.000171927
ENSMUSG00000002233	Rhoc	0.918743	7.44581e-05
ENSMUSG00000019194	Scn1b	0.9206	0.00974898
ENSMUSG00000026883	Dab2ip	0.93356	4.36501e-05
ENSMUSG00000022607	Ptk2	0.947267	0.00425176
ENSMUSG00000022893	Adamts1	0.951559	0.00209525
ENSMUSG00000001507	Itga3	0.952385	1.29956e-06
ENSMUSG00000031078	Cttn	0.954637	3.44388e-05
ENSMUSG00000031503	Col4a2	0.978137	2.32773e-06
ENSMUSG00000014599	Csf1	1.00711	1.10647e-05
ENSMUSG00000021796	Bmpr1a	1.00768	0.000331353
ENSMUSG00000001504	Irx2	1.01898	0.000584847
ENSMUSG00000021782	Dlg5	1.03419	0.00416842
ENSMUSG00000020592	Sdc1	1.06128	7.26626e-05
ENSMUSG00000036718	Micall2	1.09097	0.00877522
ENSMUSG00000019987	Arg1	1.12035	2.04963e-05
ENSMUSG00000027803	Wwtr1	1.14535	0.000394311
ENSMUSG00000026639	Lamb3	1.15334	0.000298169
ENSMUSG00000070473	Cldn3	1.15602	0.00255014
ENSMUSG00000029710	Ephb4	1.15749	0.000394749
ENSMUSG00000038146	Notch3	1.16066	3.17336e-05
ENSMUSG00000030770	Parva	1.17005	2.03928e-05
ENSMUSG00000005958	Ephb3	1.17513	0.000587243
ENSMUSG00000042821	Snai1	1.1974	0.000369597
ENSMUSG00000050953	Gja1	1.21001	2.08444e-06
ENSMUSG00000033565	Rbfox2	1.21163	4.92175e-05
ENSMUSG00000054889	Dsp	1.23	1.69334e-05
ENSMUSG00000020902	Ntn1	1.24003	2.2627e-05
ENSMUSG00000044674	Fzd1	1.24281	0.000907062
ENSMUSG00000027868	Tbx15	1.26252	2.53825e-06
ENSMUSG00000005268	Prlr	1.3112	4.30967e-06
ENSMUSG00000008601	Rab25	1.31253	0.000390673
ENSMUSG00000053646	Plxnb1	1.32625	2.17901e-06
ENSMUSG00000021359	Tfap2a	1.33594	0.00108601
ENSMUSG00000001025	S100a6	1.36496	0.0001228
ENSMUSG00000000753	Serpinf1	1.37159	0.000707531
ENSMUSG00000002900	Lamb1	1.40048	1.92969e-06
ENSMUSG00000031737	Irx5	1.40363	9.98272e-05
ENSMUSG00000017724	Etv4	1.41055	0.00451927
ENSMUSG00000017737	Mmp9	1.41088	2.02856e-09
ENSMUSG00000032419	Tbx18	1.41505	0.00181649
ENSMUSG00000023972	Ptk7	1.41917	1.27742e-06
ENSMUSG00000031734	Irx3	1.45499	3.41818e-05
ENSMUSG00000045045	Lrfn4	1.45592	0.00125112
ENSMUSG00000029859	Epha1	1.46417	0.00509139
ENSMUSG00000035342	Lzts2	1.49077	2.46248e-06
ENSMUSG00000036446	Lum	1.49169	0.00394079
ENSMUSG00000035451	Foxa1	1.49979	4.93089e-06
ENSMUSG00000001435	Col18a1	1.50584	9.94518e-10
ENSMUSG00000027954	Efna1	1.51259	0.00212227
ENSMUSG00000025608	Podxl	1.5179	7.14355e-06
ENSMUSG00000051159	Cited1	1.53799	0.000824111
ENSMUSG00000022286	Grhl2	1.53841	2.09129e-05
ENSMUSG00000062312	Erbb2	1.57477	9.86234e-07
ENSMUSG00000015647	Lama5	1.60919	0.000287537
ENSMUSG00000020758	Itgb4	1.61993	0.00294973
ENSMUSG00000031520	Vegfc	1.65239	0.00121917
ENSMUSG00000034684	Sema3f	1.65955	0.000104995
ENSMUSG00000032332	Col12a1	1.67422	0.00013288
ENSMUSG00000022261	Sdc2	1.726	2.26656e-10
ENSMUSG00000016494	Cd34	1.73294	2.13723e-05
ENSMUSG00000067006	Serpinb5	1.76239	1.41346e-06
ENSMUSG00000061353	Cxcl12	1.77507	1.98144e-05
ENSMUSG00000041120	Nbl1	1.78371	0.000145573
ENSMUSG00000005251	Ripk4	1.78525	7.75181e-10
ENSMUSG00000031548	Sfrp1	1.7854	1.22867e-06
ENSMUSG00000031558	Slit2	1.82437	0.000505522
ENSMUSG00000037852	Cpe	1.90685	3.20398e-05
ENSMUSG00000053024	Cntn2	1.98185	0.00193144
ENSMUSG00000046470	Sox18	2.00686	0.00980016
ENSMUSG00000022623	Shank3	2.16014	0.000189119
ENSMUSG00000015134	Aldh1a3	2.26713	4.58948e-06
ENSMUSG00000006386	Tek	2.30932	0.0086302
ENSMUSG00000007655	Cav1	2.36901	2.64991e-16
ENSMUSG00000041577	Prelp	2.5096	4.84383e-17
ENSMUSG00000021702	Thbs4	2.51392	0.00147401
ENSMUSG00000022367	Has2	2.52015	0.00065209
ENSMUSG00000024713	Pcsk5	2.62876	0.00405123
ENSMUSG00000023391	Dlx2	2.76231	0.00417904
ENSMUSG00000028364	Tnc	2.79325	1.86961e-11
ENSMUSG00000001506	Col1a1	2.83174	0.00235368
ENSMUSG00000063060	Sox7	2.8766	2.69463e-05
ENSMUSG00000042453	Reln	2.91064	0.00130615
ENSMUSG00000036856	Wnt4	2.9132	1.14515e-06
ENSMUSG00000019929	Dcn	2.99528	1.18843e-17
ENSMUSG00000041378	Cldn5	3.62502	2.49079e-05
ENSMUSG00000022435	Upk3a	3.83582	0.00476975
Cell differentiation
ENSMUSG00000040274	Cdk6	-0.835555	1.40474e-05
ENSMUSG00000029687	Ezh2	-0.632746	0.000440037
ENSMUSG00000024079	Eif2ak2	-0.351086	0.000538876
ENSMUSG00000025810	Nrp1	-0.343162	0.00874903
ENSMUSG00000036550	Cnot1	-0.326359	0.00818759
ENSMUSG00000004040	Stat3	-0.302383	0.00138313
ENSMUSG00000025809	Itgb1	-0.253447	0.00345655
ENSMUSG00000022528	Hes1	0.581045	0.000574566
ENSMUSG00000024659	Anxa1	0.693341	0.000467972
ENSMUSG00000001761	Smo	0.700488	0.00656831
ENSMUSG00000052911	Lamb2	0.883989	0.00108644
ENSMUSG00000026883	Dab2ip	0.93356	4.36501e-05
ENSMUSG00000021796	Bmpr1a	1.00768	0.000331353
ENSMUSG00000034245	Hdac11	1.11173	0.00307186
ENSMUSG00000027803	Wwtr1	1.14535	0.000394311
ENSMUSG00000038146	Notch3	1.16066	3.17336e-05
ENSMUSG00000042821	Snai1	1.1974	0.000369597
ENSMUSG00000024940	Ltbp3	1.31816	2.27782e-07
ENSMUSG00000021359	Tfap2a	1.33594	0.00108601
ENSMUSG00000056071	S100a9	1.3513	4.70915e-17
ENSMUSG00000002900	Lamb1	1.40048	1.92969e-06
ENSMUSG00000056054	S100a8	1.49304	4.65542e-12
ENSMUSG00000035451	Foxa1	1.49979	4.93089e-06
ENSMUSG00000027954	Efna1	1.51259	0.00212227
ENSMUSG00000062312	Erbb2	1.57477	9.86234e-07
ENSMUSG00000029070	Mxra8	1.61438	0.000360135
ENSMUSG00000041120	Nbl1	1.78371	0.000145573
ENSMUSG00000031548	Sfrp1	1.7854	1.22867e-06
ENSMUSG00000053024	Cntn2	1.98185	0.00193144
ENSMUSG00000046470	Sox18	2.00686	0.00980016
ENSMUSG00000023391	Dlx2	2.76231	0.00417904
ENSMUSG00000001506	Col1a1	2.83174	0.00235368
ENSMUSG00000042453	Reln	2.91064	0.00130615
Cell adhesion
ENSMUSG00000033831	Fgb	-4.53583	0.000185259
ENSMUSG00000047230	Cldn2	-3.83343	9.94354e-07
ENSMUSG00000031551	Ido1	-3.57318	1.8601e-08
ENSMUSG00000027699	Ect2	-1.19867	1.29313e-06
ENSMUSG00000026700	Tnfsf4	-1.02751	7.23197e-05
ENSMUSG00000040274	Cdk6	-0.835555	1.40474e-05
ENSMUSG00000036943	Rab8b	-0.703519	2.90475e-06
ENSMUSG00000023951	Vegfa	-0.680498	0.001771
ENSMUSG00000002944	Cd36	-0.636059	0.00307186
ENSMUSG00000027111	Itga6	-0.486674	0.00260939
ENSMUSG00000054693	Adam10	-0.470128	0.00118564
ENSMUSG00000051457	Spn	-0.464605	0.00316777
ENSMUSG00000057329	Bcl2	-0.455001	0.00903786
ENSMUSG00000024077	Strn	-0.445979	0.00220851
ENSMUSG00000021451	Sema4d	-0.423404	0.00081919
ENSMUSG00000019920	Lims1	-0.417558	4.66793e-05
ENSMUSG00000030830	Itgal	-0.357128	0.000910214
ENSMUSG00000025314	Ptprj	-0.353	0.00474272
ENSMUSG00000026395	Ptprc	-0.300522	0.00209981
ENSMUSG00000025809	Itgb1	-0.253447	0.00345655
ENSMUSG00000028465	Tln1	-0.244817	0.00792883
ENSMUSG00000017009	Sdc4	0.312226	0.00119514
ENSMUSG00000001552	Jup	0.557781	0.000711476
ENSMUSG00000041959	S100a10	0.645802	5.21265e-05
ENSMUSG00000022057	Adamdec1	0.669837	0.00656831
ENSMUSG00000054065	Pkp3	0.678927	1.17559e-05
ENSMUSG00000039521	Foxp3	0.682294	0.00401983
ENSMUSG00000024659	Anxa1	0.693341	0.000467972
ENSMUSG00000000303	Cdh1	0.695029	8.38705e-05
ENSMUSG00000022661	Cd200	0.717586	0.0016467
ENSMUSG00000025510	Cd151	0.724912	0.00264474
ENSMUSG00000001247	Lsr	0.741555	0.00153347
ENSMUSG00000079037	Prnp	0.756899	0.00134812
ENSMUSG00000003534	Ddr1	0.78086	0.0062471
ENSMUSG00000045394	Epcam	0.798764	0.00336263
ENSMUSG00000016529	Il10	0.802127	7.77019e-05
ENSMUSG00000027750	Postn	0.808583	8.58861e-05
ENSMUSG00000041845	Rhod	0.854567	0.00328154
ENSMUSG00000002233	Rhoc	0.918743	7.44581e-05
ENSMUSG00000022607	Ptk2	0.947267	0.00425176
ENSMUSG00000001507	Itga3	0.952385	1.29956e-06
ENSMUSG00000031078	Cttn	0.954637	3.44388e-05
ENSMUSG00000014599	Csf1	1.00711	1.10647e-05
ENSMUSG00000019851	Perp	1.0236	0.000192062
ENSMUSG00000021782	Dlg5	1.03419	0.00416842
ENSMUSG00000074227	Spint2	1.07577	4.02568e-09
ENSMUSG00000022865	Cxadr	1.0777	0.000191578
ENSMUSG00000036718	Micall2	1.09097	0.00877522
ENSMUSG00000026639	Lamb3	1.15334	0.000298169
ENSMUSG00000070473	Cldn3	1.15602	0.00255014
ENSMUSG00000050953	Gja1	1.21001	2.08444e-06
ENSMUSG00000054889	Dsp	1.23	1.69334e-05
ENSMUSG00000051375	Pcdh1	1.31463	0.00554516
ENSMUSG00000053646	Plxnb1	1.32625	2.17901e-06
ENSMUSG00000031871	Cdh5	1.36154	1.50021e-08
ENSMUSG00000070047	Fat1	1.367	1.14821e-06
ENSMUSG00000017446	C1qtnf1	1.43209	5.81509e-05
ENSMUSG00000029859	Epha1	1.46417	0.00509139
ENSMUSG00000026249	Serpine2	1.51076	4.41003e-12
ENSMUSG00000022548	Apod	1.51224	7.58791e-05
ENSMUSG00000025608	Podxl	1.5179	7.14355e-06
ENSMUSG00000001672	Marveld3	1.52955	0.00239486
ENSMUSG00000022286	Grhl2	1.53841	2.09129e-05
ENSMUSG00000062312	Erbb2	1.57477	9.86234e-07
ENSMUSG00000015647	Lama5	1.60919	0.000287537
ENSMUSG00000020758	Itgb4	1.61993	0.00294973
ENSMUSG00000031520	Vegfc	1.65239	0.00121917
ENSMUSG00000044393	Dsg2	1.71692	1.55695e-06
ENSMUSG00000061353	Cxcl12	1.77507	1.98144e-05
ENSMUSG00000031548	Sfrp1	1.7854	1.22867e-06
ENSMUSG00000001946	Esam	1.82672	0.000484764
ENSMUSG00000022505	Emp2	1.83025	6.99972e-13
ENSMUSG00000061527	Krt5	1.88158	6.83324e-06
ENSMUSG00000035258	Abi3bp	1.89644	7.23357e-05
ENSMUSG00000001240	Ramp2	2.09208	0.00292872
ENSMUSG00000025064	Col17a1	2.17265	0.000519003
ENSMUSG00000045545	Krt14	2.26051	8.02987e-06
ENSMUSG00000006386	Tek	2.30932	0.0086302
ENSMUSG00000006369	Fbln1	2.35526	3.44388e-05
ENSMUSG00000022367	Has2	2.52015	0.00065209
ENSMUSG00000026580	Selp	2.6854	4.94232e-05
ENSMUSG00000028364	Tnc	2.79325	1.86961e-11
ENSMUSG00000001506	Col1a1	2.83174	0.00235368
ENSMUSG00000036856	Wnt4	2.9132	1.14515e-06
ENSMUSG00000023886	Smoc2	2.96437	6.29735e-05
ENSMUSG00000051076	Vtcn1	3.51304	4.61249e-07
ENSMUSG00000041378	Cldn5	3.62502	2.49079e-05
Extracellular matrix (ECM)
ENSMUSG00000033831	Fgb	-4.53583	0.000185259
ENSMUSG00000028626	Col9a2	-3.05544	4.46618e-10
ENSMUSG00000016942	Tmprss6	-1.68459	0.000580014
ENSMUSG00000027966	Col11a1	-1.33306	0.00610175
ENSMUSG00000021831	Ero1l	-0.683425	1.29256e-06
ENSMUSG00000002944	Cd36	-0.636059	0.00307186
ENSMUSG00000027009	Itga4	-0.609331	4.06008e-05
ENSMUSG00000033792	Atp7a	-0.591799	0.000142693
ENSMUSG00000027111	Itga6	-0.486674	0.00260939
ENSMUSG00000054693	Adam10	-0.470128	0.00118564
ENSMUSG00000034640	Tiparp	-0.420291	0.00124963
ENSMUSG00000027087	Itgav	-0.381766	0.00737438
ENSMUSG00000030830	Itgal	-0.357128	0.000910214
ENSMUSG00000025473	Adam8	-0.330855	0.00356391
ENSMUSG00000030530	Furin	-0.28102	0.00468319
ENSMUSG00000025809	Itgb1	-0.253447	0.00345655
ENSMUSG00000023944	Hsp90ab1	0.29019	0.00307186
ENSMUSG00000006800	Sulf2	0.371463	0.000484764
ENSMUSG00000050578	Mmp13	0.630446	0.00106463
ENSMUSG00000024401	Tnf	0.648572	2.047e-05
ENSMUSG00000031740	Mmp2	0.680579	9.89725e-05
ENSMUSG00000000303	Cdh1	0.695029	8.38705e-05
ENSMUSG00000003534	Ddr1	0.78086	0.0062471
ENSMUSG00000027750	Postn	0.808583	8.58861e-05
ENSMUSG00000031502	Col4a1	0.857517	9.04368e-05
ENSMUSG00000070436	Serpinh1	0.878823	0.000298169
ENSMUSG00000052911	Lamb2	0.883989	0.00108644
ENSMUSG00000022607	Ptk2	0.947267	0.00425176
ENSMUSG00000001507	Itga3	0.952385	1.29956e-06
ENSMUSG00000031503	Col4a2	0.978137	2.32773e-06
ENSMUSG00000019987	Arg1	1.12035	2.04963e-05
ENSMUSG00000020674	Pxdn	1.15332	8.61455e-06
ENSMUSG00000026639	Lamb3	1.15334	0.000298169
ENSMUSG00000042116	Vwa1	1.19219	0.00394079
ENSMUSG00000001930	Vwf	1.26667	0.000564873
ENSMUSG00000031451	Gas6	1.2737	3.7476e-07
ENSMUSG00000022098	Bmp1	1.31704	1.98144e-05
ENSMUSG00000002900	Lamb1	1.40048	1.92969e-06
ENSMUSG00000017737	Mmp9	1.41088	2.02856e-09
ENSMUSG00000036446	Lum	1.49169	0.00394079
ENSMUSG00000001435	Col18a1	1.50584	9.94518e-10
ENSMUSG00000028763	Hspg2	1.52836	6.7308e-08
ENSMUSG00000036545	Adamts2	1.57582	0.00405228
ENSMUSG00000026574	Dpt	1.58273	0.00106555
ENSMUSG00000015647	Lama5	1.60919	0.000287537
ENSMUSG00000020758	Itgb4	1.61993	0.00294973
ENSMUSG00000028111	Ctsk	1.6408	4.02922e-05
ENSMUSG00000032332	Col12a1	1.67422	0.00013288
ENSMUSG00000067006	Serpinb5	1.76239	1.41346e-06
ENSMUSG00000031274	Col4a5	1.8359	2.42915e-12
ENSMUSG00000035258	Abi3bp	1.89644	7.23357e-05
ENSMUSG00000020241	Col6a2	1.91537	0.0079894
ENSMUSG00000001240	Ramp2	2.09208	0.00292872
ENSMUSG00000006369	Fbln1	2.35526	3.44388e-05
ENSMUSG00000022367	Has2	2.52015	0.00065209
ENSMUSG00000029661	Col1a2	2.67499	0.00449784
ENSMUSG00000028364	Tnc	2.79325	1.86961e-11
ENSMUSG00000001506	Col1a1	2.83174	0.00235368
ENSMUSG00000023886	Smoc2	2.96437	6.29735e-05
ENSMUSG00000043613	Mmp3	2.97604	8.39715e-14
ENSMUSG00000019929	Dcn	2.99528	1.18843e-17
ENSMUSG00000042436	Mfap4	4.07433	1.42719e-05
ChromatinRemodeling
ENSMUSG00000026605	Cenpf	-1.87984	7.66524e-11
ENSMUSG00000072980	Oip5	-1.63389	0.00579404
ENSMUSG00000041431	Ccnb1	-1.44023	9.58023e-05
ENSMUSG00000045328	Cenpe	-1.35128	2.49978e-08
ENSMUSG00000027323	Rad51	-1.30369	7.36948e-07
ENSMUSG00000020914	Top2a	-1.25918	7.92747e-15
ENSMUSG00000015880	Ncapg	-1.25808	1.82389e-06
ENSMUSG00000027306	Nusap1	-1.24163	1.37871e-07
ENSMUSG00000020897	Aurkb	-1.20406	2.83458e-06
ENSMUSG00000028873	Cdca8	-1.16765	1.47555e-07
ENSMUSG00000019942	Cdk1	-1.1439	8.66095e-07
ENSMUSG00000017146	Brca1	-1.10349	5.26993e-08
ENSMUSG00000017716	Birc5	-1.07347	0.000112717
ENSMUSG00000028312	Smc2	-1.06246	1.68685e-09
ENSMUSG00000031262	Cenpi	-1.00785	0.00146905
ENSMUSG00000031756	Cenpn	-0.998015	0.00750067
ENSMUSG00000020649	Rrm2	-0.988261	4.5671e-08
ENSMUSG00000047534	Mis18bp1	-0.973881	0.00122585
ENSMUSG00000001228	Uhrf1	-0.970143	7.75181e-10
ENSMUSG00000024791	Cdca5	-0.955536	5.50499e-05
ENSMUSG00000038252	Ncapd2	-0.953228	1.79992e-07
ENSMUSG00000034906	Ncaph	-0.949088	1.25551e-05
ENSMUSG00000034329	Brip1	-0.940731	0.000210617
ENSMUSG00000027496	Aurka	-0.834413	0.00133146
ENSMUSG00000002835	Chaf1a	-0.827307	1.34419e-05
ENSMUSG00000029177	Cenpa	-0.814844	3.89995e-06
ENSMUSG00000022360	Atad2	-0.809159	1.08563e-07
ENSMUSG00000005470	Asf1b	-0.80739	0.00145074
ENSMUSG00000030978	Rrm1	-0.747718	3.56484e-05
ENSMUSG00000025001	Hells	-0.732937	0.000110967
ENSMUSG00000002870	Mcm2	-0.707783	9.29811e-07
ENSMUSG00000005410	Mcm5	-0.700177	0.000406744
ENSMUSG00000023951	Vegfa	-0.680498	0.001771
ENSMUSG00000000028	Cdc45	-0.679946	0.00706209
ENSMUSG00000049932	H2afx	-0.674374	0.000420654
ENSMUSG00000041859	Mcm3	-0.671419	4.08667e-06
ENSMUSG00000030528	Blm	-0.658967	0.00570984
ENSMUSG00000004099	Dnmt1	-0.653658	1.48787e-09
ENSMUSG00000034218	Atm	-0.652122	0.000112292
ENSMUSG00000052889	Prkcb	-0.642022	0.000480841
ENSMUSG00000029687	Ezh2	-0.632746	0.000440037
ENSMUSG00000022673	Mcm4	-0.627852	2.18692e-06
ENSMUSG00000024660	Incenp	-0.620115	2.04963e-05
ENSMUSG00000033792	Atp7a	-0.591799	0.000142693
ENSMUSG00000026355	Mcm6	-0.572055	6.25493e-05
ENSMUSG00000027641	Rbl1	-0.570938	2.89338e-05
ENSMUSG00000035024	Ncapd3	-0.563098	0.00021242
ENSMUSG00000054717	Hmgb2	-0.554194	7.38938e-06
ENSMUSG00000042029	Ncapg2	-0.516757	0.00159586
ENSMUSG00000036875	Dna2	-0.501774	0.00171692
ENSMUSG00000029730	Mcm7	-0.49881	0.00128969
ENSMUSG00000033454	Zbtb1	-0.492382	0.00658418
ENSMUSG00000040943	Tet2	-0.481827	8.43746e-05
ENSMUSG00000038759	Nup205	-0.476035	0.000123816
ENSMUSG00000041235	Chd7	-0.474964	0.000741638
ENSMUSG00000021377	Dek	-0.465662	4.96323e-06
ENSMUSG00000032481	Smarcc1	-0.460013	0.00205546
ENSMUSG00000042323	Pbrm1	-0.454139	0.000176324
ENSMUSG00000003226	Ranbp2	-0.429488	0.000104995
ENSMUSG00000063550	Nup98	-0.426208	0.000361614
ENSMUSG00000034349	Smc4	-0.420164	0.00075632
ENSMUSG00000017548	Suz12	-0.405982	0.00257412
ENSMUSG00000037896	Rcor1	-0.380599	0.00216406
ENSMUSG00000049516	Spty2d1	-0.373056	0.0003293
ENSMUSG00000020647	Ncoa1	-0.362634	0.00242126
ENSMUSG00000061589	Dot1l	-0.356826	0.00416842
ENSMUSG00000022314	Rad21	-0.35506	0.00181649
ENSMUSG00000020893	Per1	-0.352656	0.00292872
ENSMUSG00000025862	Stag2	-0.34118	0.00119055
ENSMUSG00000017485	Top2b	-0.332786	0.00520701
ENSMUSG00000031715	Smarca5	-0.330645	0.0085396
ENSMUSG00000031229	Atrx	-0.329475	0.00803256
ENSMUSG00000031386	Hcfc1	-0.325664	0.00264916
ENSMUSG00000028820	Sfpq	-0.283139	0.00754188
ENSMUSG00000019505	Ubb	0.306442	0.000985951
ENSMUSG00000008348	Ubc	0.326021	0.00415878
ENSMUSG00000026048	Ercc5	0.571261	0.00065392
ENSMUSG00000053411	Cbx7	0.611062	0.00990588
ENSMUSG00000041959	S100a10	0.645802	5.21265e-05
ENSMUSG00000038260	Trpm4	0.67178	0.00791376
ENSMUSG00000039521	Foxp3	0.682294	0.00401983
ENSMUSG00000024659	Anxa1	0.693341	0.000467972
ENSMUSG00000018102	Hist1h2bc	0.79906	0.00370734
ENSMUSG00000015619	Gata3	0.830443	0.000134327
ENSMUSG00000034245	Hdac11	1.11173	0.00307186
ENSMUSG00000035451	Foxa1	1.49979	4.93089e-06
DNA replication and repair
ENSMUSG00000026605	Cenpf	-1.87984	7.66524e-11
ENSMUSG00000044201	Cdc25c	-1.53345	0.00570984
ENSMUSG00000039396	Neil3	-1.53155	9.12396e-07
ENSMUSG00000034023	Fancd2	-1.47429	8.60117e-07
ENSMUSG00000026622	Nek2	-1.45765	1.47443e-08
ENSMUSG00000041431	Ccnb1	-1.44023	9.58023e-05
ENSMUSG00000001403	Ube2c	-1.41923	1.59693e-07
ENSMUSG00000027379	Bub1	-1.39098	2.9617e-06
ENSMUSG00000022034	Esco2	-1.35775	0.00125663
ENSMUSG00000045328	Cenpe	-1.35128	2.49978e-08
ENSMUSG00000027323	Rad51	-1.30369	7.36948e-07
ENSMUSG00000020914	Top2a	-1.25918	7.92747e-15
ENSMUSG00000030867	Plk1	-1.24916	7.08923e-07
ENSMUSG00000040084	Bub1b	-1.23116	2.15652e-08
ENSMUSG00000042489	Clspn	-1.22447	7.54131e-07
ENSMUSG00000020185	E2f7	-1.21907	0.000155953
ENSMUSG00000020897	Aurkb	-1.20406	2.83458e-06
ENSMUSG00000007080	Pole	-1.19781	6.11996e-10
ENSMUSG00000037544	Dlgap5	-1.17806	4.30099e-07
ENSMUSG00000039187	Fanci	-1.16658	7.55049e-05
ENSMUSG00000037474	Dtl	-1.16394	6.55765e-09
ENSMUSG00000028702	Rad54l	-1.15376	2.63351e-06
ENSMUSG00000046179	E2f8	-1.14629	1.46355e-08
ENSMUSG00000019942	Cdk1	-1.1439	8.66095e-07
ENSMUSG00000030677	Kif22	-1.13414	0.000112639
ENSMUSG00000001517	Foxm1	-1.12501	2.37287e-08
ENSMUSG00000038379	Ttk	-1.11003	0.00465032
ENSMUSG00000017146	Brca1	-1.10349	5.26993e-08
ENSMUSG00000034206	Polq	-1.09103	0.00181649
ENSMUSG00000039748	Exo1	-1.08231	0.00463733
ENSMUSG00000026669	Mcm10	-1.03732	2.43837e-05
ENSMUSG00000029910	Mad2l1	-1.03421	6.84355e-06
ENSMUSG00000026700	Tnfsf4	-1.02751	7.23197e-05
ENSMUSG00000026196	Bard1	-1.02744	0.000161252
ENSMUSG00000035455	Fignl1	-0.997152	0.00358916
ENSMUSG00000020649	Rrm2	-0.988261	4.5671e-08
ENSMUSG00000001228	Uhrf1	-0.970143	7.75181e-10
ENSMUSG00000024791	Cdca5	-0.955536	5.50499e-05
ENSMUSG00000034329	Brip1	-0.940731	0.000210617
ENSMUSG00000030346	Rad51ap1	-0.936006	0.00251337
ENSMUSG00000028212	Ccne2	-0.910072	0.0012287
ENSMUSG00000025574	Tk1	-0.89403	2.49917e-05
ENSMUSG00000017499	Cdc6	-0.879798	0.000191541
ENSMUSG00000020974	Pole2	-0.86964	0.00704006
ENSMUSG00000028587	Orc1	-0.840203	0.00245616
ENSMUSG00000056394	Lig1	-0.830419	4.03945e-06
ENSMUSG00000002835	Chaf1a	-0.827307	1.34419e-05
ENSMUSG00000022360	Atad2	-0.809159	1.08563e-07
ENSMUSG00000045751	Mms22l	-0.770893	0.000493463
ENSMUSG00000030978	Rrm1	-0.747718	3.56484e-05
ENSMUSG00000032815	Fanca	-0.743268	0.000800128
ENSMUSG00000028864	Hgf	-0.737948	1.02336e-07
ENSMUSG00000002870	Mcm2	-0.707783	9.29811e-07
ENSMUSG00000006678	Pola1	-0.70085	0.000210416
ENSMUSG00000005410	Mcm5	-0.700177	0.000406744
ENSMUSG00000002068	Ccne1	-0.699392	0.00137694
ENSMUSG00000023951	Vegfa	-0.680498	0.001771
ENSMUSG00000000028	Cdc45	-0.679946	0.00706209
ENSMUSG00000025395	Prim1	-0.678797	0.00217863
ENSMUSG00000049932	H2afx	-0.674374	0.000420654
ENSMUSG00000041859	Mcm3	-0.671419	4.08667e-06
ENSMUSG00000030528	Blm	-0.658967	0.00570984
ENSMUSG00000004099	Dnmt1	-0.653658	1.48787e-09
ENSMUSG00000018362	Kpna2	-0.652378	0.00121917
ENSMUSG00000034218	Atm	-0.652122	0.000112292
ENSMUSG00000022673	Mcm4	-0.627852	2.18692e-06
ENSMUSG00000032555	Topbp1	-0.615755	2.17901e-06
ENSMUSG00000021690	Jmy	-0.587936	0.000878236
ENSMUSG00000026355	Mcm6	-0.572055	6.25493e-05
ENSMUSG00000000838	Fmr1	-0.563956	2.45796e-06
ENSMUSG00000036202	Rif1	-0.561143	0.000337066
ENSMUSG00000054717	Hmgb2	-0.554194	7.38938e-06
ENSMUSG00000058290	Espl1	-0.534895	0.000435509
ENSMUSG00000028560	Usp1	-0.530769	2.01588e-05
ENSMUSG00000039994	Timeless	-0.52935	0.00313226
ENSMUSG00000036875	Dna2	-0.501774	0.00171692
ENSMUSG00000029730	Mcm7	-0.49881	0.00128969
ENSMUSG00000029009	Mthfr	-0.496857	2.49917e-05
ENSMUSG00000033454	Zbtb1	-0.492382	0.00658418
ENSMUSG00000025612	Bach1	-0.47463	0.001893
ENSMUSG00000021377	Dek	-0.465662	4.96323e-06
ENSMUSG00000002297	Dbf4	-0.457193	0.00634358
ENSMUSG00000006585	Cdt1	-0.456299	0.00345655
ENSMUSG00000031529	Tnks	-0.454067	0.00323673
ENSMUSG00000024742	Fen1	-0.434998	0.00826064
ENSMUSG00000063550	Nup98	-0.426208	0.000361614
ENSMUSG00000017291	Taok1	-0.408095	0.00449784
ENSMUSG00000029202	Pds5a	-0.400687	0.00196594
ENSMUSG00000019979	Apaf1	-0.377759	0.0046325
ENSMUSG00000049516	Spty2d1	-0.373056	0.0003293
ENSMUSG00000061589	Dot1l	-0.356826	0.00416842
ENSMUSG00000022314	Rad21	-0.35506	0.00181649
ENSMUSG00000020594	Pum2	-0.344181	0.00159586
ENSMUSG00000025862	Stag2	-0.34118	0.00119055
ENSMUSG00000033596	Rfwd3	-0.341021	0.00992765
ENSMUSG00000017485	Top2b	-0.332786	0.00520701
ENSMUSG00000031715	Smarca5	-0.330645	0.0085396
ENSMUSG00000040383	Aqr	-0.329679	0.00717544
ENSMUSG00000031229	Atrx	-0.329475	0.00803256
ENSMUSG00000004040	Stat3	-0.302383	0.00138313
ENSMUSG00000040552	C3ar1	-0.295629	0.00974502
ENSMUSG00000028820	Sfpq	-0.283139	0.00754188
ENSMUSG00000046434	Hnrnpa1	-0.278472	0.00784329
ENSMUSG00000000275	Trim25	-0.267628	0.00614672
ENSMUSG00000019505	Ubb	0.306442	0.000985951
ENSMUSG00000008348	Ubc	0.326021	0.00415878
ENSMUSG00000003873	Bax	0.334517	0.00538586
ENSMUSG00000036781	Rps27l	0.491265	0.00808693
ENSMUSG00000027907	S100a11	0.505556	0.000793933
ENSMUSG00000035824	Tk2	0.505581	0.000592696
ENSMUSG00000023067	Cdkn1a	0.512179	1.64949e-10
ENSMUSG00000026048	Ercc5	0.571261	0.00065392
ENSMUSG00000033955	Tnks1bp1	0.581386	0.00245616
ENSMUSG00000052684	Jun	0.655717	1.03381e-07
ENSMUSG00000029484	Anxa3	0.657932	0.000477157
ENSMUSG00000039521	Foxp3	0.682294	0.00401983
ENSMUSG00000024659	Anxa1	0.693341	0.000467972
ENSMUSG00000016529	Il10	0.802127	7.77019e-05
ENSMUSG00000015619	Gata3	0.830443	0.000134327
ENSMUSG00000050953	Gja1	1.21001	2.08444e-06
ENSMUSG00000091971	Hspa1a	1.22539	0.00190838
ENSMUSG00000022286	Grhl2	1.53841	2.09129e-05
ENSMUSG00000020905	Usp43	2.12777	0.000872867
ENSMUSG00000030562	Nox4	3.37652	1.46907e-07
Cell division
ENSMUSG00000067276	Capn6	-2.57516	0.00305071
ENSMUSG00000030849	Fgfr2	-1.88577	0.000559652
ENSMUSG00000026605	Cenpf	-1.87984	7.66524e-11
ENSMUSG00000041498	Kif14	-1.63785	4.74616e-06
ENSMUSG00000072980	Oip5	-1.63389	0.00579404
ENSMUSG00000035683	Melk	-1.62637	2.94794e-07
ENSMUSG00000026779	Mastl	-1.57162	7.2239e-05
ENSMUSG00000044201	Cdc25c	-1.53345	0.00570984
ENSMUSG00000020330	Hmmr	-1.52617	1.88996e-06
ENSMUSG00000028678	Kif2c	-1.52213	3.29701e-09
ENSMUSG00000024989	Cep55	-1.49832	2.16377e-09
ENSMUSG00000034023	Fancd2	-1.47429	8.60117e-07
ENSMUSG00000026622	Nek2	-1.45765	1.47443e-08
ENSMUSG00000041431	Ccnb1	-1.44023	9.58023e-05
ENSMUSG00000001403	Ube2c	-1.41923	1.59693e-07
ENSMUSG00000033952	Aspm	-1.41359	4.96212e-09
ENSMUSG00000027379	Bub1	-1.39098	2.9617e-06
ENSMUSG00000027715	Ccna2	-1.38936	2.77651e-10
ENSMUSG00000038738	Shank1	-1.36794	0.000580014
ENSMUSG00000022034	Esco2	-1.35775	0.00125663
ENSMUSG00000045328	Cenpe	-1.35128	2.49978e-08
ENSMUSG00000029414	Kntc1	-1.32963	5.06176e-08
ENSMUSG00000012443	Kif11	-1.30529	2.51379e-12
ENSMUSG00000027323	Rad51	-1.30369	7.36948e-07
ENSMUSG00000002055	Spag5	-1.29146	1.51604e-09
ENSMUSG00000026683	Nuf2	-1.28417	0.000105399
ENSMUSG00000051378	Kif18b	-1.27014	1.19822e-05
ENSMUSG00000020914	Top2a	-1.25918	7.92747e-15
ENSMUSG00000015880	Ncapg	-1.25808	1.82389e-06
ENSMUSG00000031004	Mki67	-1.25311	1.10906e-13
ENSMUSG00000030867	Plk1	-1.24916	7.08923e-07
ENSMUSG00000027306	Nusap1	-1.24163	1.37871e-07
ENSMUSG00000029516	Cit	-1.23827	4.29862e-07
ENSMUSG00000040084	Bub1b	-1.23116	2.15652e-08
ENSMUSG00000042489	Clspn	-1.22447	7.54131e-07
ENSMUSG00000020185	E2f7	-1.21907	0.000155953
ENSMUSG00000020897	Aurkb	-1.20406	2.83458e-06
ENSMUSG00000027699	Ect2	-1.19867	1.29313e-06
ENSMUSG00000007080	Pole	-1.19781	6.11996e-10
ENSMUSG00000006398	Cdc20	-1.19586	1.14821e-06
ENSMUSG00000036777	Anln	-1.18719	6.71364e-07
ENSMUSG00000037544	Dlgap5	-1.17806	4.30099e-07
ENSMUSG00000028873	Cdca8	-1.16765	1.47555e-07
ENSMUSG00000039187	Fanci	-1.16658	7.55049e-05
ENSMUSG00000037474	Dtl	-1.16394	6.55765e-09
ENSMUSG00000028702	Rad54l	-1.15376	2.63351e-06
ENSMUSG00000046179	E2f8	-1.14629	1.46355e-08
ENSMUSG00000019942	Cdk1	-1.1439	8.66095e-07
ENSMUSG00000028718	Stil	-1.13958	0.000142693
ENSMUSG00000032221	Mns1	-1.13818	0.00345655
ENSMUSG00000030677	Kif22	-1.13414	0.000112639
ENSMUSG00000032400	Zwilch	-1.12925	2.59519e-06
ENSMUSG00000001517	Foxm1	-1.12501	2.37287e-08
ENSMUSG00000022033	Pbk	-1.1139	0.00325654
ENSMUSG00000038379	Ttk	-1.11003	0.00465032
ENSMUSG00000038943	Prc1	-1.10854	3.67369e-08
ENSMUSG00000017146	Brca1	-1.10349	5.26993e-08
ENSMUSG00000023505	Cdca3	-1.09843	4.0655e-06
ENSMUSG00000034206	Polq	-1.09103	0.00181649
ENSMUSG00000003779	Kif20a	-1.08654	2.32322e-07
ENSMUSG00000039748	Exo1	-1.08231	0.00463733
ENSMUSG00000017716	Birc5	-1.07347	0.000112717
ENSMUSG00000074476	Spc24	-1.07016	0.00588464
ENSMUSG00000028312	Smc2	-1.06246	1.68685e-09
ENSMUSG00000078566	Bnip3	-1.05753	2.04378e-11
ENSMUSG00000048922	Cdca2	-1.04144	0.00065392
ENSMUSG00000026669	Mcm10	-1.03732	2.43837e-05
ENSMUSG00000029910	Mad2l1	-1.03421	6.84355e-06
ENSMUSG00000028068	Iqgap3	-1.03384	1.64073e-05
ENSMUSG00000026700	Tnfsf4	-1.02751	7.23197e-05
ENSMUSG00000026196	Bard1	-1.02744	0.000161252
ENSMUSG00000031262	Cenpi	-1.00785	0.00146905
ENSMUSG00000005233	Spc25	-1.00709	0.00063216
ENSMUSG00000024056	Ndc80	-1.00147	0.000842816
ENSMUSG00000072082	Ccnf	-0.99877	0.000509007
ENSMUSG00000031756	Cenpn	-0.998015	0.00750067
ENSMUSG00000035455	Fignl1	-0.997152	0.00358916
ENSMUSG00000020649	Rrm2	-0.988261	4.5671e-08
ENSMUSG00000047534	Mis18bp1	-0.973881	0.00122585
ENSMUSG00000001228	Uhrf1	-0.970143	7.75181e-10
ENSMUSG00000036768	Kif15	-0.95703	8.58861e-05
ENSMUSG00000024791	Cdca5	-0.955536	5.50499e-05
ENSMUSG00000038252	Ncapd2	-0.953228	1.79992e-07
ENSMUSG00000034906	Ncaph	-0.949088	1.25551e-05
ENSMUSG00000028207	Asph	-0.941865	6.83311e-07
ENSMUSG00000034329	Brip1	-0.940731	0.000210617
ENSMUSG00000030346	Rad51ap1	-0.936006	0.00251337
ENSMUSG00000032254	Kif23	-0.930481	5.25038e-06
ENSMUSG00000028212	Ccne2	-0.910072	0.0012287
ENSMUSG00000027469	Tpx2	-0.898217	7.40951e-06
ENSMUSG00000017499	Cdc6	-0.879798	0.000191541
ENSMUSG00000017861	Mybl2	-0.871349	0.000884601
ENSMUSG00000037313	Tacc3	-0.871337	6.5593e-08
ENSMUSG00000020974	Pole2	-0.86964	0.00704006
ENSMUSG00000023015	Racgap1	-0.866963	2.2856e-08
ENSMUSG00000025758	Plk4	-0.852361	0.00036464
ENSMUSG00000028587	Orc1	-0.840203	0.00245616
ENSMUSG00000040274	Cdk6	-0.835555	1.40474e-05
ENSMUSG00000027496	Aurka	-0.834413	0.00133146
ENSMUSG00000023845	Lnpep	-0.834299	5.33829e-09
ENSMUSG00000021707	Dhfr	-0.834051	0.00302239
ENSMUSG00000032487	Ptgs2	-0.833961	1.63103e-05
ENSMUSG00000056394	Lig1	-0.830419	4.03945e-06
ENSMUSG00000032218	Ccnb2	-0.823691	2.96275e-05
ENSMUSG00000029177	Cenpa	-0.814844	3.89995e-06
ENSMUSG00000022360	Atad2	-0.809159	1.08563e-07
ENSMUSG00000028832	Stmn1	-0.753408	0.000176854
ENSMUSG00000032815	Fanca	-0.743268	0.000800128
ENSMUSG00000028864	Hgf	-0.737948	1.02336e-07
ENSMUSG00000025001	Hells	-0.732937	0.000110967
ENSMUSG00000023908	Pkmyt1	-0.71581	0.000864246
ENSMUSG00000002870	Mcm2	-0.707783	9.29811e-07
ENSMUSG00000006678	Pola1	-0.70085	0.000210416
ENSMUSG00000005410	Mcm5	-0.700177	0.000406744
ENSMUSG00000002068	Ccne1	-0.699392	0.00137694
ENSMUSG00000034926	Dhcr24	-0.699058	0.00813245
ENSMUSG00000024795	Kif20b	-0.691782	0.00029896
ENSMUSG00000023951	Vegfa	-0.680498	0.001771
ENSMUSG00000000028	Cdc45	-0.679946	0.00706209
ENSMUSG00000025395	Prim1	-0.678797	0.00217863
ENSMUSG00000049932	H2afx	-0.674374	0.000420654
ENSMUSG00000028044	Cks1b	-0.67428	0.00394484
ENSMUSG00000041859	Mcm3	-0.671419	4.08667e-06
ENSMUSG00000033054	Npat	-0.659991	0.000154048
ENSMUSG00000030528	Blm	-0.658967	0.00570984
ENSMUSG00000004099	Dnmt1	-0.653658	1.48787e-09
ENSMUSG00000018362	Kpna2	-0.652378	0.00121917
ENSMUSG00000034218	Atm	-0.652122	0.000112292
ENSMUSG00000051220	Ercc6l	-0.646029	0.00726381
ENSMUSG00000002944	Cd36	-0.636059	0.00307186
ENSMUSG00000029687	Ezh2	-0.632746	0.000440037
ENSMUSG00000022673	Mcm4	-0.627852	2.18692e-06
ENSMUSG00000024660	Incenp	-0.620115	2.04963e-05
ENSMUSG00000061436	Hipk2	-0.60991	0.000733522
ENSMUSG00000074802	Gas2l3	-0.597066	0.000168649
ENSMUSG00000021690	Jmy	-0.587936	0.000878236
ENSMUSG00000026355	Mcm6	-0.572055	6.25493e-05
ENSMUSG00000000838	Fmr1	-0.563956	2.45796e-06
ENSMUSG00000035024	Ncapd3	-0.563098	0.00021242
ENSMUSG00000036202	Rif1	-0.561143	0.000337066
ENSMUSG00000028341	Nr4a3	-0.559026	0.000163763
ENSMUSG00000029408	Abcb9	-0.557293	0.00352439
ENSMUSG00000040549	Ckap5	-0.544307	9.04417e-07
ENSMUSG00000033713	Foxn3	-0.540673	0.00152043
ENSMUSG00000058290	Espl1	-0.534895	0.000435509
ENSMUSG00000039994	Timeless	-0.52935	0.00313226
ENSMUSG00000042029	Ncapg2	-0.516757	0.00159586
ENSMUSG00000036875	Dna2	-0.501774	0.00171692
ENSMUSG00000029730	Mcm7	-0.49881	0.00128969
ENSMUSG00000029009	Mthfr	-0.496857	2.49917e-05
ENSMUSG00000034480	Diaph2	-0.49579	0.00122176
ENSMUSG00000005102	Eif2ak4	-0.482755	0.00170052
ENSMUSG00000020120	Plek	-0.482685	0.00370042
ENSMUSG00000024542	Cep192	-0.475417	0.000147019
ENSMUSG00000025612	Bach1	-0.47463	0.001893
ENSMUSG00000021377	Dek	-0.465662	4.96323e-06
ENSMUSG00000032481	Smarcc1	-0.460013	0.00205546
ENSMUSG00000002297	Dbf4	-0.457193	0.00634358
ENSMUSG00000020362	Cnot6	-0.457124	4.94232e-05
ENSMUSG00000029840	Mtpn	-0.457069	5.78386e-05
ENSMUSG00000006585	Cdt1	-0.456299	0.00345655
ENSMUSG00000057329	Bcl2	-0.455001	0.00903786
ENSMUSG00000042323	Pbrm1	-0.454139	0.000176324
ENSMUSG00000031529	Tnks	-0.454067	0.00323673
ENSMUSG00000058013	Sept11	-0.449428	0.000317352
ENSMUSG00000021824	Ap3m1	-0.436574	0.00743182
ENSMUSG00000032253	Phip	-0.434212	0.00191754
ENSMUSG00000003226	Ranbp2	-0.429488	0.000104995
ENSMUSG00000063550	Nup98	-0.426208	0.000361614
ENSMUSG00000034349	Smc4	-0.420164	0.00075632
ENSMUSG00000024073	Birc6	-0.418493	0.000693878
ENSMUSG00000005672	Kit	-0.417098	0.00854327
ENSMUSG00000070327	Rnf213	-0.411495	1.78522e-05
ENSMUSG00000026667	Uhmk1	-0.409676	0.00134812
ENSMUSG00000040351	Ankib1	-0.409664	0.00305071
ENSMUSG00000031838	Ifi30	-0.408985	0.00644757
ENSMUSG00000017291	Taok1	-0.408095	0.00449784
ENSMUSG00000029202	Pds5a	-0.400687	0.00196594
ENSMUSG00000025860	Xiap	-0.400437	0.000210416
ENSMUSG00000021959	Lats2	-0.399622	0.00782519
ENSMUSG00000027087	Itgav	-0.381766	0.00737438
ENSMUSG00000005034	Prkacb	-0.375592	0.000779669
ENSMUSG00000049516	Spty2d1	-0.373056	0.0003293
ENSMUSG00000038482	Tfdp1	-0.372825	0.00662449
ENSMUSG00000021068	Nin	-0.37111	0.00800163
ENSMUSG00000061136	Prpf40a	-0.36203	0.00181649
ENSMUSG00000022314	Rad21	-0.35506	0.00181649
ENSMUSG00000006740	Kif5b	-0.345621	0.0019697
ENSMUSG00000020594	Pum2	-0.344181	0.00159586
ENSMUSG00000022443	Myh9	-0.344063	0.000142916
ENSMUSG00000025862	Stag2	-0.34118	0.00119055
ENSMUSG00000033596	Rfwd3	-0.341021	0.00992765
ENSMUSG00000017485	Top2b	-0.332786	0.00520701
ENSMUSG00000031229	Atrx	-0.329475	0.00803256
ENSMUSG00000020152	Actr2	-0.328567	0.00201202
ENSMUSG00000036550	Cnot1	-0.326359	0.00818759
ENSMUSG00000020290	Xpo1	-0.326252	0.0016467
ENSMUSG00000031386	Hcfc1	-0.325664	0.00264916
ENSMUSG00000045210	Vcpip1	-0.3201	0.00373806
ENSMUSG00000020715	Ern1	-0.30927	0.00933176
ENSMUSG00000047126	Cltc	-0.308473	0.000719698
ENSMUSG00000027381	Bcl2l11	-0.306722	0.00566399
ENSMUSG00000004040	Stat3	-0.302383	0.00138313
ENSMUSG00000026395	Ptprc	-0.300522	0.00209981
ENSMUSG00000062014	Gmfb	-0.289388	0.0093532
ENSMUSG00000032479	Map4	-0.286562	0.00868442
ENSMUSG00000028820	Sfpq	-0.283139	0.00754188
ENSMUSG00000030530	Furin	-0.28102	0.00468319
ENSMUSG00000046434	Hnrnpa1	-0.278472	0.00784329
ENSMUSG00000025809	Itgb1	-0.253447	0.00345655
ENSMUSG00000023944	Hsp90ab1	0.29019	0.00307186
ENSMUSG00000019505	Ubb	0.306442	0.000985951
ENSMUSG00000008348	Ubc	0.326021	0.00415878
ENSMUSG00000003873	Bax	0.334517	0.00538586
ENSMUSG00000018572	Phf23	0.36175	0.00281772
ENSMUSG00000001289	Pfdn5	0.369709	0.00272642
ENSMUSG00000090733	Rps27	0.412978	0.000885941
ENSMUSG00000028063	Lmna	0.48349	0.00641579
ENSMUSG00000036781	Rps27l	0.491265	0.00808693
ENSMUSG00000023067	Cdkn1a	0.512179	1.64949e-10
ENSMUSG00000038393	Txnip	0.517747	2.92215e-06
ENSMUSG00000038418	Egr1	0.524117	0.00150949
ENSMUSG00000035314	Gdpd5	0.542737	0.00394079
ENSMUSG00000020205	Phlda1	0.549198	0.000685868
ENSMUSG00000022528	Hes1	0.581045	0.000574566
ENSMUSG00000033955	Tnks1bp1	0.581386	0.00245616
ENSMUSG00000035299	Mid1	0.584902	0.00164302
ENSMUSG00000021701	Plk2	0.592398	0.00025859
ENSMUSG00000024401	Tnf	0.648572	2.047e-05
ENSMUSG00000039521	Foxp3	0.682294	0.00401983
ENSMUSG00000024659	Anxa1	0.693341	0.000467972
ENSMUSG00000020601	Trib2	0.735624	0.00535876
ENSMUSG00000079037	Prnp	0.756899	0.00134812
ENSMUSG00000016529	Il10	0.802127	7.77019e-05
ENSMUSG00000015619	Gata3	0.830443	0.000134327
ENSMUSG00000017493	Igfbp4	0.881859	0.00416842
ENSMUSG00000029166	Mapre3	0.891383	0.001453
ENSMUSG00000040714	Klc3	0.900558	0.00728353
ENSMUSG00000002985	Apoe	0.918235	1.00572e-18
ENSMUSG00000002233	Rhoc	0.918743	7.44581e-05
ENSMUSG00000026883	Dab2ip	0.93356	4.36501e-05
ENSMUSG00000022607	Ptk2	0.947267	0.00425176
ENSMUSG00000026638	Irf6	1.01506	0.000105185
ENSMUSG00000027803	Wwtr1	1.14535	0.000394311
ENSMUSG00000091971	Hspa1a	1.22539	0.00190838
ENSMUSG00000044674	Fzd1	1.24281	0.000907062
ENSMUSG00000031451	Gas6	1.2737	3.7476e-07
ENSMUSG00000032419	Tbx18	1.41505	0.00181649
ENSMUSG00000031955	Bcar1	1.45516	3.47571e-06
ENSMUSG00000025083	Afap1l2	1.48687	0.00178553
ENSMUSG00000035342	Lzts2	1.49077	2.46248e-06
ENSMUSG00000035451	Foxa1	1.49979	4.93089e-06
ENSMUSG00000051159	Cited1	1.53799	0.000824111
ENSMUSG00000062312	Erbb2	1.57477	9.86234e-07
ENSMUSG00000031520	Vegfc	1.65239	0.00121917
ENSMUSG00000040852	Plekhh2	1.7509	7.26696e-07
ENSMUSG00000031548	Sfrp1	1.7854	1.22867e-06
ENSMUSG00000031558	Slit2	1.82437	0.000505522
ENSMUSG00000021567	Nkd2	1.84793	8.6645e-05
ENSMUSG00000053024	Cntn2	1.98185	0.00193144
ENSMUSG00000068744	Psrc1	2.08473	1.18843e-17
ENSMUSG00000023046	Igfbp6	2.14288	0.00703325
ENSMUSG00000022623	Shank3	2.16014	0.000189119
ENSMUSG00000024810	Il33	2.28594	3.6516e-13
ENSMUSG00000007655	Cav1	2.36901	2.64991e-16
ENSMUSG00000021702	Thbs4	2.51392	0.00147401
ENSMUSG00000036856	Wnt4	2.9132	1.14515e-06
ENSMUSG00000026817	Ak1	3.49825	3.34953e-23

## Sheet: gene sets - tumor-stromal cells
Table S1F: Differentially expressed genes within annotated gene sets (Tumor/Stromal cells)
ensembl ID	gene symbol	log2-fold change	Adjusted p-value
		(Irr vs Non-Irr)
Wound healing
ENSMUSG00000076609	Igkc	-6.31027	2.97298e-13
ENSMUSG00000053399	Adamts18	-3.60333	0.00215897
ENSMUSG00000052889	Prkcb	-3.26837	0.000467384
ENSMUSG00000033831	Fgb	-3.17492	2.4252e-12
ENSMUSG00000050272	Dscam	-2.89628	0.00257771
ENSMUSG00000026770	Il2ra	-2.74356	0.00599611
ENSMUSG00000026700	Tnfsf4	-2.72587	0.00303398
ENSMUSG00000026573	Xcl1	-2.58931	0.00232127
ENSMUSG00000028927	Padi2	-2.47717	1.3897e-05
ENSMUSG00000031004	Mki67	-2.25755	2.50855e-20
ENSMUSG00000031165	Was	-2.25698	0.0047091
ENSMUSG00000034116	Vav1	-2.17079	0.00125652
ENSMUSG00000041431	Ccnb1	-2.11846	4.23559e-05
ENSMUSG00000020573	Pik3cg	-2.0181	0.00137023
ENSMUSG00000028341	Nr4a3	-2.00444	0.00377241
ENSMUSG00000057880	Abat	-1.8794	0.00145228
ENSMUSG00000078566	Bnip3	-1.85965	8.77012e-11
ENSMUSG00000027715	Ccna2	-1.83627	1.34879e-06
ENSMUSG00000025207	Sema4g	-1.83543	0.000473598
ENSMUSG00000022033	Pbk	-1.81492	0.00204014
ENSMUSG00000031551	Ido1	-1.70553	9.05767e-05
ENSMUSG00000024109	Nrxn1	-1.68292	3.188e-06
ENSMUSG00000019942	Cdk1	-1.61918	8.78509e-07
ENSMUSG00000032265	Fam46a	-1.56419	4.84329e-12
ENSMUSG00000030413	Pglyrp1	-1.51045	8.01018e-07
ENSMUSG00000032202	Rab27a	-1.46909	0.000207558
ENSMUSG00000063531	Sema3e	-1.38722	0.0001043
ENSMUSG00000023951	Vegfa	-1.3628	6.82995e-21
ENSMUSG00000031093	Dock11	-1.28968	0.00246103
ENSMUSG00000027030	Stk39	-1.21663	4.35513e-18
ENSMUSG00000022883	Robo1	-1.2022	1.28545e-09
ENSMUSG00000039145	Camk1d	-1.18963	0.00340958
ENSMUSG00000051379	Flrt3	-1.17626	1.99804e-08
ENSMUSG00000002068	Ccne1	-1.15873	0.00614875
ENSMUSG00000028885	Smpdl3b	-1.14038	0.000194001
ENSMUSG00000016028	Celsr1	-1.0785	1.50083e-07
ENSMUSG00000020893	Per1	-1.04792	7.83124e-08
ENSMUSG00000074272	Ceacam1	-1.03994	3.75515e-14
ENSMUSG00000029687	Ezh2	-1.03395	7.84155e-08
ENSMUSG00000032238	Rora	-1.02711	0.000127937
ENSMUSG00000032496	Ltf	-1.02254	0.00125194
ENSMUSG00000022676	Snai2	-1.01393	0.000506859
ENSMUSG00000019997	Ctgf	-1.00789	7.57723e-13
ENSMUSG00000030287	Itpr2	-1.00022	3.84922e-06
ENSMUSG00000004791	Pgf	-0.995734	0.00148082
ENSMUSG00000042190	Cmklr1	-0.972546	3.99445e-05
ENSMUSG00000002489	Tiam1	-0.966893	1.77619e-08
ENSMUSG00000031596	Slc7a2	-0.962372	8.77777e-05
ENSMUSG00000028780	Sema3c	-0.958223	0.00323827
ENSMUSG00000021678	F2rl1	-0.928303	0.000326567
ENSMUSG00000040152	Thbs1	-0.83637	3.27027e-07
ENSMUSG00000032702	Kank1	-0.820108	4.48244e-05
ENSMUSG00000033685	Ucp2	-0.800356	1.40625e-05
ENSMUSG00000032501	Trib1	-0.793288	6.7665e-08
ENSMUSG00000039942	Ptger4	-0.793093	0.00014894
ENSMUSG00000024639	Gnaq	-0.788663	1.37151e-07
ENSMUSG00000037411	Serpine1	-0.76073	1.62694e-05
ENSMUSG00000053475	Tnfaip6	-0.742842	0.00348025
ENSMUSG00000052085	Dock8	-0.737939	0.00126313
ENSMUSG00000030102	Itpr1	-0.726526	4.61771e-05
ENSMUSG00000051412	Vamp7	-0.722344	0.00094728
ENSMUSG00000028434	Epb41l4b	-0.680857	3.97034e-08
ENSMUSG00000029580	Actb	-0.675443	3.48925e-05
ENSMUSG00000002413	Braf	-0.668871	0.000772828
ENSMUSG00000027533	Fabp5	-0.65982	0.000381629
ENSMUSG00000015605	Srf	-0.659362	9.8867e-07
ENSMUSG00000037896	Rcor1	-0.65452	0.000209096
ENSMUSG00000028195	Cyr61	-0.650862	1.02384e-11
ENSMUSG00000041417	Pik3r1	-0.649571	5.43992e-07
ENSMUSG00000001627	Ifrd1	-0.645733	1.31435e-06
ENSMUSG00000007613	Tgfbr1	-0.625635	0.000835094
ENSMUSG00000024486	Hbegf	-0.616455	4.92296e-05
ENSMUSG00000020612	Prkar1a	-0.610457	2.48017e-06
ENSMUSG00000033295	Ptprf	-0.603134	0.00063756
ENSMUSG00000029238	Clock	-0.597005	0.000387681
ENSMUSG00000037876	Jmjd1c	-0.568428	0.000402178
ENSMUSG00000020594	Pum2	-0.561562	5.43905e-06
ENSMUSG00000020611	Gna13	-0.561146	0.000966265
ENSMUSG00000040481	Bptf	-0.554036	0.00194693
ENSMUSG00000037921	Ddx60	-0.552654	9.98024e-05
ENSMUSG00000029826	Zc3hav1	-0.551652	0.0081343
ENSMUSG00000042622	Maff	-0.547773	0.0040315
ENSMUSG00000029840	Mtpn	-0.536865	0.000174514
ENSMUSG00000021109	Hif1a	-0.531436	0.00405927
ENSMUSG00000050965	Prkca	-0.529226	0.000155781
ENSMUSG00000029512	Ulk1	-0.529039	5.77083e-06
ENSMUSG00000062825	Actg1	-0.523515	0.000176898
ENSMUSG00000009575	Cbx5	-0.518178	0.000533525
ENSMUSG00000024122	Pdpk1	-0.514868	0.00081119
ENSMUSG00000025860	Xiap	-0.50849	0.0060964
ENSMUSG00000000078	Klf6	-0.502404	4.99731e-05
ENSMUSG00000020063	Sirt1	-0.500882	0.00473315
ENSMUSG00000021775	Nr1d2	-0.490039	0.00415089
ENSMUSG00000032601	Prkar2a	-0.481751	0.00032892
ENSMUSG00000032369	Plscr1	-0.47109	0.00312295
ENSMUSG00000020894	Vamp2	-0.470199	0.00143739
ENSMUSG00000027164	Traf6	-0.453931	0.00222344
ENSMUSG00000050310	Rictor	-0.441886	0.00077113
ENSMUSG00000027598	Itch	-0.44134	1.77292e-05
ENSMUSG00000018160	Med1	-0.405497	0.00358394
ENSMUSG00000016559	H3f3b	-0.388775	0.000131126
ENSMUSG00000023830	Igf2r	-0.382709	0.00692672
ENSMUSG00000058318	Phf21a	-0.378194	0.00449587
ENSMUSG00000027665	Pik3ca	-0.374743	0.00283187
ENSMUSG00000061130	Ppm1b	-0.372325	0.00324859
ENSMUSG00000003131	Pafah1b2	-0.367594	0.000938557
ENSMUSG00000020516	Rps6kb1	-0.356768	0.00431919
ENSMUSG00000028580	Pum1	-0.347819	0.00215822
ENSMUSG00000054364	Rhob	-0.325866	0.00840596
ENSMUSG00000059796	Eif4a1	-0.296874	0.000440981
ENSMUSG00000041891	Lman1	-0.291222	0.00983658
ENSMUSG00000063065	Mapk3	0.323403	0.00824409
ENSMUSG00000030774	Pak1	0.400117	0.00678213
ENSMUSG00000029071	Dvl1	0.412374	0.00338951
ENSMUSG00000021024	Psma6	0.418503	0.00873638
ENSMUSG00000015714	Cers2	0.420482	6.45818e-05
ENSMUSG00000063856	Gpx1	0.422732	0.00980262
ENSMUSG00000025499	Hras	0.424697	0.00215692
ENSMUSG00000005779	Psmb4	0.433355	0.000518463
ENSMUSG00000001123	Lgals9	0.441148	0.000192301
ENSMUSG00000064210	Ano6	0.45137	0.000787603
ENSMUSG00000030342	Cd9	0.459314	0.000134604
ENSMUSG00000021939	Ctsb	0.462249	0.000466511
ENSMUSG00000030341	Tnfrsf1a	0.473455	4.84141e-05
ENSMUSG00000000555	Itga5	0.482705	0.000204318
ENSMUSG00000015837	Sqstm1	0.506809	3.27853e-05
ENSMUSG00000018909	Arrb1	0.522947	0.000268212
ENSMUSG00000060803	Gstp1	0.541521	0.00268963
ENSMUSG00000007041	Clic1	0.541795	3.36265e-07
ENSMUSG00000026641	Usf1	0.552059	0.000186932
ENSMUSG00000015619	Gata3	0.553957	0.00231734
ENSMUSG00000028041	Adam15	0.579577	3.23407e-05
ENSMUSG00000032198	Dock6	0.582404	0.000622461
ENSMUSG00000022146	Osmr	0.597075	3.90704e-06
ENSMUSG00000022982	Sod1	0.602211	8.5838e-07
ENSMUSG00000033538	Casp4	0.609406	6.23875e-05
ENSMUSG00000035673	Sbno2	0.621164	2.35218e-06
ENSMUSG00000021756	Il6st	0.62267	2.31622e-08
ENSMUSG00000026181	Ppm1f	0.624189	5.1758e-06
ENSMUSG00000006800	Sulf2	0.626532	3.25052e-06
ENSMUSG00000041939	Mvk	0.62858	0.00950596
ENSMUSG00000013629	Cad	0.638677	0.000116226
ENSMUSG00000053113	Socs3	0.649231	1.28197e-07
ENSMUSG00000004451	Ralb	0.653716	7.00464e-07
ENSMUSG00000023051	Tarbp2	0.677258	0.00285127
ENSMUSG00000002233	Rhoc	0.681986	4.91553e-06
ENSMUSG00000029428	Stx2	0.685424	0.00063912
ENSMUSG00000026193	Fn1	0.708912	0.00277517
ENSMUSG00000026249	Serpine2	0.735301	3.86007e-09
ENSMUSG00000040447	Spns2	0.740659	0.000225132
ENSMUSG00000037966	Ninj1	0.741607	0.000111634
ENSMUSG00000024659	Anxa1	0.750773	0.000358181
ENSMUSG00000010047	Hyal2	0.76465	0.000184574
ENSMUSG00000040952	Rps19	0.775529	5.47507e-05
ENSMUSG00000049577	Zfpm1	0.77933	0.00286386
ENSMUSG00000019987	Arg1	0.796339	0.000664903
ENSMUSG00000027712	Anxa5	0.806343	1.82327e-07
ENSMUSG00000038037	Socs1	0.809013	3.30767e-05
ENSMUSG00000037499	Nenf	0.815655	8.72087e-05
ENSMUSG00000029231	Pdgfra	0.817162	0.00498144
ENSMUSG00000031778	Cx3cl1	0.826649	9.62983e-11
ENSMUSG00000031558	Slit2	0.827394	0.000447485
ENSMUSG00000024778	Fas	0.829689	2.46487e-06
ENSMUSG00000028909	Ptpru	0.829962	0.00283433
ENSMUSG00000024911	Fibp	0.851892	9.91689e-08
ENSMUSG00000017446	C1qtnf1	0.871693	1.10513e-05
ENSMUSG00000061119	Prcp	0.879007	0.000906242
ENSMUSG00000024401	Tnf	0.891032	4.75181e-06
ENSMUSG00000041736	Tspo	0.894918	1.28888e-09
ENSMUSG00000004951	Hspb1	0.894926	5.51478e-08
ENSMUSG00000014599	Csf1	0.897024	5.0409e-11
ENSMUSG00000056121	Fez2	0.907524	1.189e-06
ENSMUSG00000032231	Anxa2	0.918627	8.3463e-06
ENSMUSG00000025494	Sigirr	0.92001	4.45332e-07
ENSMUSG00000024810	Il33	0.959036	0.00109793
ENSMUSG00000062991	Nrg1	0.975129	0.00341831
ENSMUSG00000039109	F13a1	0.994208	0.00225589
ENSMUSG00000008398	Elk3	1.00423	1.14307e-08
ENSMUSG00000038058	Nod1	1.0191	2.34024e-06
ENSMUSG00000029417	Cxcl9	1.03552	8.34344e-05
ENSMUSG00000029304	Spp1	1.05841	2.14193e-05
ENSMUSG00000029380	Cxcl1	1.07503	5.37965e-09
ENSMUSG00000057729	Prtn3	1.08911	0.00190243
ENSMUSG00000003873	Bax	1.11383	1.62026e-31
ENSMUSG00000070348	Ccnd1	1.12449	2.73024e-27
ENSMUSG00000023067	Cdkn1a	1.1288	3.02825e-33
ENSMUSG00000029484	Anxa3	1.20939	6.60443e-08
ENSMUSG00000031451	Gas6	1.21424	8.51722e-27
ENSMUSG00000020826	Nos2	1.2433	0.00116328
ENSMUSG00000048612	Myof	1.2454	4.31025e-07
ENSMUSG00000016024	Lbp	1.26674	1.90167e-17
ENSMUSG00000026072	Il1r1	1.28955	4.72383e-08
ENSMUSG00000008734	Gprc5b	1.29138	3.94641e-07
ENSMUSG00000036856	Wnt4	1.29691	0.00519744
ENSMUSG00000032135	Mcam	1.31783	1.56856e-13
ENSMUSG00000024529	Lox	1.35632	0.000263165
ENSMUSG00000029371	Cxcl5	1.36874	0.000545877
ENSMUSG00000015085	Entpd2	1.37365	0.00729448
ENSMUSG00000031712	Il15	1.38635	4.08212e-10
ENSMUSG00000006205	Htra1	1.38809	0.000103371
ENSMUSG00000000530	Acvrl1	1.41373	7.79152e-09
ENSMUSG00000062515	Fabp4	1.42175	8.73807e-05
ENSMUSG00000074364	Ehd2	1.42374	1.36635e-16
ENSMUSG00000021950	Anxa8	1.44406	1.50226e-16
ENSMUSG00000037936	Scarb1	1.44587	6.32565e-21
ENSMUSG00000030077	Chl1	1.47972	0.000299764
ENSMUSG00000001131	Timp1	1.48108	0.000177195
ENSMUSG00000060183	Cxcl11	1.51039	1.30926e-05
ENSMUSG00000031520	Vegfc	1.52552	1.66699e-13
ENSMUSG00000002944	Cd36	1.53202	0.000330791
ENSMUSG00000018593	Sparc	1.53936	1.10748e-08
ENSMUSG00000033149	Phldb2	1.59702	0.000274848
ENSMUSG00000031538	Plat	1.60472	4.41655e-08
ENSMUSG00000033788	Dysf	1.61277	4.53417e-11
ENSMUSG00000038668	Lpar1	1.651	0.000187923
ENSMUSG00000007655	Cav1	1.66191	1.91923e-36
ENSMUSG00000024164	C3	1.75722	6.81585e-05
ENSMUSG00000020682	Mmp28	1.77549	0.00318228
ENSMUSG00000027208	Fgf7	1.79398	0.00521466
ENSMUSG00000028883	Sema3a	1.87282	0.000941095
ENSMUSG00000000489	Pdgfb	1.9119	9.19562e-20
ENSMUSG00000032271	Nnmt	1.97673	0.00762337
ENSMUSG00000026109	Tmeff2	1.97954	0.00199715
ENSMUSG00000026365	Cfh	1.98539	3.41588e-13
ENSMUSG00000028364	Tnc	1.98638	0.000650174
ENSMUSG00000027611	Procr	2.00736	8.37595e-10
ENSMUSG00000048120	Entpd1	2.02006	0.00429971
ENSMUSG00000022548	Apod	2.02684	4.42874e-12
ENSMUSG00000032006	Pdgfd	2.04548	2.8991e-11
ENSMUSG00000000753	Serpinf1	2.05857	2.38516e-09
ENSMUSG00000020676	Ccl11	2.06552	1.9998e-06
ENSMUSG00000032860	P2ry2	2.06739	5.48809e-08
ENSMUSG00000009281	Rarres2	2.10193	1.35377e-08
ENSMUSG00000034684	Sema3f	2.10386	3.11986e-25
ENSMUSG00000072812	Ahnak2	2.1098	5.60615e-10
ENSMUSG00000019929	Dcn	2.12323	1.64919e-32
ENSMUSG00000041120	Nbl1	2.15248	3.84927e-15
ENSMUSG00000028583	Pdpn	2.16581	2.98237e-07
ENSMUSG00000024371	C2	2.1766	2.382e-06
ENSMUSG00000042485	Mustn1	2.18037	0.00145155
ENSMUSG00000037362	Nov	2.21768	2.4178e-09
ENSMUSG00000045092	S1pr1	2.22385	3.01429e-06
ENSMUSG00000038264	Sema7a	2.29868	7.9809e-15
ENSMUSG00000023224	Serping1	2.30322	1.12187e-20
ENSMUSG00000022469	Rapgef3	2.35939	1.08707e-11
ENSMUSG00000061353	Cxcl12	2.36433	2.49523e-26
ENSMUSG00000021367	Edn1	2.41259	3.96055e-09
ENSMUSG00000021508	Cxcl14	2.4392	1.40584e-13
ENSMUSG00000031465	Angpt2	2.50388	7.90606e-16
ENSMUSG00000046186	Cd109	2.53206	1.591e-32
ENSMUSG00000020053	Igf1	2.55845	2.5713e-13
ENSMUSG00000009185	Ccl8	2.57048	0.000206243
ENSMUSG00000074743	Thbd	2.57621	8.90429e-20
ENSMUSG00000023078	Cxcl13	2.59967	0.00320005
ENSMUSG00000038188	Scarf1	2.67541	1.13688e-24
ENSMUSG00000021256	Vash1	2.69418	9.25157e-08
ENSMUSG00000027239	Mdk	2.72285	2.07985e-06
ENSMUSG00000033174	Mgll	2.74324	1.54189e-14
ENSMUSG00000000120	Ngfr	2.76087	0.000169106
ENSMUSG00000079105	C7	2.84011	0.00629032
ENSMUSG00000027082	Tfpi	2.85279	1.52596e-17
ENSMUSG00000006386	Tek	2.88608	9.22132e-22
ENSMUSG00000044317	Gpr4	2.89162	1.09006e-13
ENSMUSG00000031990	Jam3	2.95189	5.84327e-07
ENSMUSG00000022887	Masp1	2.99433	7.02128e-07
ENSMUSG00000017969	Ptgis	3.02772	2.64565e-05
ENSMUSG00000006369	Fbln1	3.06652	4.00708e-26
ENSMUSG00000015053	Gata2	3.12237	4.75757e-22
ENSMUSG00000054641	Mmrn1	3.16275	1.70997e-09
ENSMUSG00000026814	Eng	3.23719	8.73711e-79
ENSMUSG00000016494	Cd34	3.34044	7.04683e-60
ENSMUSG00000050896	Rtn4rl2	3.3911	0.000125953
ENSMUSG00000058914	C1qtnf3	3.41956	8.79776e-13
ENSMUSG00000062960	Kdr	3.47984	2.95273e-52
ENSMUSG00000000320	Alox12	3.51095	4.06111e-06
ENSMUSG00000001506	Col1a1	3.56686	2.53399e-08
ENSMUSG00000029661	Col1a2	3.59333	1.19787e-08
ENSMUSG00000001227	Sema6b	3.73339	3.95759e-24
ENSMUSG00000031841	Cdh13	3.8808	1.56377e-69
ENSMUSG00000021702	Thbs4	3.90566	1.05275e-15
ENSMUSG00000026580	Selp	4.0191	1.40684e-49
ENSMUSG00000001930	Vwf	4.07262	2.22728e-118
ENSMUSG00000026582	Sele	4.08631	2.55019e-15
ENSMUSG00000028978	Nos3	4.63072	6.53291e-59
ENSMUSG00000030111	A2m	5.14485	6.62855e-07
ENSMUSG00000074934	Grem1	5.95949	3.87759e-06
ENSMUSG00000058952	Cfi	6.29277	0.000445181
ENSMUSG00000030017	Reg3g	6.60322	5.86532e-05
Vasculogenesis
ENSMUSG00000052889	Prkcb	-3.26837	0.000467384
ENSMUSG00000030849	Fgfr2	-2.28994	3.9697e-24
ENSMUSG00000041431	Ccnb1	-2.11846	4.23559e-05
ENSMUSG00000051397	Tacstd2	-2.05582	6.18006e-09
ENSMUSG00000020573	Pik3cg	-2.0181	0.00137023
ENSMUSG00000028341	Nr4a3	-2.00444	0.00377241
ENSMUSG00000046179	E2f8	-1.96314	4.17863e-05
ENSMUSG00000017146	Brca1	-1.71231	0.000414495
ENSMUSG00000024109	Nrxn1	-1.68292	3.188e-06
ENSMUSG00000030087	Klf15	-1.64904	0.00194263
ENSMUSG00000019942	Cdk1	-1.61918	8.78509e-07
ENSMUSG00000005672	Kit	-1.59624	1.1377e-20
ENSMUSG00000030671	Pde3b	-1.57705	0.00475205
ENSMUSG00000001249	Hpn	-1.54926	0.000203951
ENSMUSG00000033730	Egr3	-1.46706	6.7713e-10
ENSMUSG00000028068	Iqgap3	-1.46179	0.000223461
ENSMUSG00000056174	Col8a2	-1.46128	8.68055e-08
ENSMUSG00000063531	Sema3e	-1.38722	0.0001043
ENSMUSG00000023951	Vegfa	-1.3628	6.82995e-21
ENSMUSG00000028967	Errfi1	-1.35487	8.39998e-10
ENSMUSG00000022309	Angpt1	-1.34039	0.00285126
ENSMUSG00000041147	Brca2	-1.2912	0.00101476
ENSMUSG00000023034	Nr4a1	-1.27225	1.77553e-09
ENSMUSG00000051367	Six1	-1.21981	0.00503431
ENSMUSG00000022883	Robo1	-1.2022	1.28545e-09
ENSMUSG00000050199	Lgr4	-1.13409	4.8371e-11
ENSMUSG00000055254	Ntrk2	-1.12781	5.04813e-14
ENSMUSG00000037664	Cdkn1c	-1.11804	0.00166796
ENSMUSG00000074272	Ceacam1	-1.03994	3.75515e-14
ENSMUSG00000032238	Rora	-1.02711	0.000127937
ENSMUSG00000022676	Snai2	-1.01393	0.000506859
ENSMUSG00000019997	Ctgf	-1.00789	7.57723e-13
ENSMUSG00000071856	Mcc	-0.997635	2.45697e-07
ENSMUSG00000004791	Pgf	-0.995734	0.00148082
ENSMUSG00000054717	Hmgb2	-0.969456	0.00067223
ENSMUSG00000028780	Sema3c	-0.958223	0.00323827
ENSMUSG00000021678	F2rl1	-0.928303	0.000326567
ENSMUSG00000034640	Tiparp	-0.909684	6.90916e-10
ENSMUSG00000061436	Hipk2	-0.872473	2.0864e-05
ENSMUSG00000018209	Stk4	-0.86145	7.21143e-05
ENSMUSG00000041688	Amot	-0.855119	0.000139572
ENSMUSG00000010051	Hyal1	-0.846843	0.00650226
ENSMUSG00000040152	Thbs1	-0.83637	3.27027e-07
ENSMUSG00000057315	Arhgap24	-0.823215	0.00754887
ENSMUSG00000005148	Klf5	-0.820619	4.75125e-05
ENSMUSG00000033792	Atp7a	-0.797679	0.000114024
ENSMUSG00000039942	Ptger4	-0.793093	0.00014894
ENSMUSG00000037411	Serpine1	-0.76073	1.62694e-05
ENSMUSG00000075470	Deaf1	-0.710991	0.00037903
ENSMUSG00000018476	Kdm6b	-0.708652	4.13059e-05
ENSMUSG00000028434	Epb41l4b	-0.680857	3.97034e-08
ENSMUSG00000021466	Ptch1	-0.660076	0.000435966
ENSMUSG00000015605	Srf	-0.659362	9.8867e-07
ENSMUSG00000028195	Cyr61	-0.650862	1.02384e-11
ENSMUSG00000007613	Tgfbr1	-0.625635	0.000835094
ENSMUSG00000024294	Mib1	-0.588778	7.2362e-06
ENSMUSG00000032216	Nedd4	-0.573748	4.79496e-07
ENSMUSG00000024290	Rock1	-0.565576	0.000538927
ENSMUSG00000020611	Gna13	-0.561146	0.000966265
ENSMUSG00000042460	C1galt1	-0.545443	0.00913332
ENSMUSG00000022353	Mtss1	-0.54485	0.000276622
ENSMUSG00000021109	Hif1a	-0.531436	0.00405927
ENSMUSG00000050965	Prkca	-0.529226	0.000155781
ENSMUSG00000024122	Pdpk1	-0.514868	0.00081119
ENSMUSG00000008575	Nfib	-0.513119	0.00632473
ENSMUSG00000027104	Atf2	-0.51099	0.002404
ENSMUSG00000020063	Sirt1	-0.500882	0.00473315
ENSMUSG00000027087	Itgav	-0.49413	1.0378e-06
ENSMUSG00000020160	Meis1	-0.493191	0.00990371
ENSMUSG00000042207	Kdm5b	-0.48514	0.000524515
ENSMUSG00000007817	Zmiz1	-0.48158	0.00268963
ENSMUSG00000035725	Prkx	-0.481549	0.00436423
ENSMUSG00000066595	Flvcr1	-0.478386	0.0019393
ENSMUSG00000019256	Ahr	-0.47012	0.00109131
ENSMUSG00000031987	Egln1	-0.467533	0.000939367
ENSMUSG00000020715	Ern1	-0.465229	0.000791674
ENSMUSG00000026361	Cdc73	-0.454315	0.00741066
ENSMUSG00000050310	Rictor	-0.441886	0.00077113
ENSMUSG00000022346	Myc	-0.432746	0.00349497
ENSMUSG00000052681	Rap1b	-0.422876	0.00215897
ENSMUSG00000007880	Arid1a	-0.412481	0.00443543
ENSMUSG00000018160	Med1	-0.405497	0.00358394
ENSMUSG00000076431	Sox4	-0.391471	0.000205022
ENSMUSG00000058454	Dhcr7	-0.390351	0.0072615
ENSMUSG00000047281	Sfn	-0.388663	0.00801417
ENSMUSG00000006932	Ctnnb1	-0.384046	0.0010481
ENSMUSG00000053110	Yap1	-0.37954	0.00419201
ENSMUSG00000027665	Pik3ca	-0.374743	0.00283187
ENSMUSG00000024913	Lrp5	-0.363476	0.00254213
ENSMUSG00000054364	Rhob	-0.325866	0.00840596
ENSMUSG00000009741	Ubp1	-0.318881	0.007578
ENSMUSG00000029390	Tmed2	-0.282299	0.00534532
ENSMUSG00000030605	Mfge8	0.322213	0.00814457
ENSMUSG00000015092	Edf1	0.397189	0.003442
ENSMUSG00000063856	Gpx1	0.422732	0.00980262
ENSMUSG00000025499	Hras	0.424697	0.00215692
ENSMUSG00000023008	Fmnl3	0.445875	6.06947e-05
ENSMUSG00000020184	Mdm2	0.461455	0.000829571
ENSMUSG00000000555	Itga5	0.482705	0.000204318
ENSMUSG00000026104	Stat1	0.48612	0.000269441
ENSMUSG00000039745	Htatip2	0.510244	0.00516416
ENSMUSG00000038650	Rnh1	0.547788	8.34344e-05
ENSMUSG00000015619	Gata3	0.553957	0.00231734
ENSMUSG00000015647	Lama5	0.566702	0.0039676
ENSMUSG00000075254	Heg1	0.57811	9.77239e-05
ENSMUSG00000028041	Adam15	0.579577	3.23407e-05
ENSMUSG00000026836	Acvr1	0.61982	4.48244e-05
ENSMUSG00000006800	Sulf2	0.626532	3.25052e-06
ENSMUSG00000022475	Hdac7	0.637054	0.000201937
ENSMUSG00000053113	Socs3	0.649231	1.28197e-07
ENSMUSG00000031207	Msn	0.6524	1.16103e-06
ENSMUSG00000032359	Ctsh	0.672106	0.000131525
ENSMUSG00000001039	B9d1	0.673605	0.0094621
ENSMUSG00000020937	Plcd3	0.686228	0.00190374
ENSMUSG00000026193	Fn1	0.708912	0.00277517
ENSMUSG00000025283	Sat1	0.71277	2.81769e-07
ENSMUSG00000031548	Sfrp1	0.713953	0.00323011
ENSMUSG00000022414	Tab1	0.727504	0.00184096
ENSMUSG00000019987	Arg1	0.796339	0.000664903
ENSMUSG00000022505	Emp2	0.809759	1.90246e-13
ENSMUSG00000049791	Fzd4	0.811825	0.00823471
ENSMUSG00000029231	Pdgfra	0.817162	0.00498144
ENSMUSG00000031778	Cx3cl1	0.826649	9.62983e-11
ENSMUSG00000031558	Slit2	0.827394	0.000447485
ENSMUSG00000031955	Bcar1	0.867792	3.88668e-07
ENSMUSG00000061119	Prcp	0.879007	0.000906242
ENSMUSG00000004951	Hspb1	0.894926	5.51478e-08
ENSMUSG00000001300	Efnb2	0.896164	0.000176866
ENSMUSG00000032231	Anxa2	0.918627	8.3463e-06
ENSMUSG00000000957	Mmp14	0.93177	5.41011e-05
ENSMUSG00000024140	Epas1	0.933827	2.77749e-07
ENSMUSG00000062991	Nrg1	0.975129	0.00341831
ENSMUSG00000008398	Elk3	1.00423	1.14307e-08
ENSMUSG00000022330	Osr2	1.0075	0.00732212
ENSMUSG00000073802	Cdkn2b	1.05265	0.000890135
ENSMUSG00000002900	Lamb1	1.0865	1.67553e-09
ENSMUSG00000003873	Bax	1.11383	1.62026e-31
ENSMUSG00000070348	Ccnd1	1.12449	2.73024e-27
ENSMUSG00000021281	Tnfaip2	1.15601	9.11556e-06
ENSMUSG00000027954	Efna1	1.19024	1.08869e-16
ENSMUSG00000029484	Anxa3	1.20939	6.60443e-08
ENSMUSG00000036856	Wnt4	1.29691	0.00519744
ENSMUSG00000032135	Mcam	1.31783	1.56856e-13
ENSMUSG00000024529	Lox	1.35632	0.000263165
ENSMUSG00000002289	Angptl4	1.36909	0.00435725
ENSMUSG00000006205	Htra1	1.38809	0.000103371
ENSMUSG00000021266	Wars	1.39732	4.13359e-17
ENSMUSG00000000530	Acvrl1	1.41373	7.79152e-09
ENSMUSG00000027962	Vcam1	1.41378	2.95747e-20
ENSMUSG00000001435	Col18a1	1.43198	4.54125e-20
ENSMUSG00000037936	Scarb1	1.44587	6.32565e-21
ENSMUSG00000031520	Vegfc	1.52552	1.66699e-13
ENSMUSG00000018593	Sparc	1.53936	1.10748e-08
ENSMUSG00000031503	Col4a2	1.54955	2.18438e-09
ENSMUSG00000034205	Loxl2	1.5535	2.6213e-05
ENSMUSG00000028108	Ecm1	1.57556	2.02062e-10
ENSMUSG00000005397	Nid1	1.59579	5.58099e-11
ENSMUSG00000027996	Sfrp2	1.62598	2.88249e-08
ENSMUSG00000007655	Cav1	1.66191	1.91923e-36
ENSMUSG00000022367	Has2	1.6636	1.14861e-05
ENSMUSG00000033278	Ptprm	1.67801	4.58491e-15
ENSMUSG00000026586	Prrx1	1.68398	2.9441e-05
ENSMUSG00000028763	Hspg2	1.68451	1.8494e-19
ENSMUSG00000023411	Nfatc4	1.73946	0.000121943
ENSMUSG00000024164	C3	1.75722	6.81585e-05
ENSMUSG00000024713	Pcsk5	1.76366	3.8349e-06
ENSMUSG00000025969	Nrp2	1.76923	1.82099e-21
ENSMUSG00000014813	Stc1	1.77531	1.6347e-06
ENSMUSG00000097328	Tnfsf12	1.78668	0.000941095
ENSMUSG00000027208	Fgf7	1.79398	0.00521466
ENSMUSG00000022382	Wnt7b	1.89808	8.2202e-08
ENSMUSG00000025608	Podxl	1.90332	5.0728e-31
ENSMUSG00000000489	Pdgfb	1.9119	9.19562e-20
ENSMUSG00000024168	Tmem204	1.92154	1.62388e-08
ENSMUSG00000016918	Sulf1	1.9964	2.33589e-08
ENSMUSG00000028717	Tal1	2.02536	5.81299e-06
ENSMUSG00000022548	Apod	2.02684	4.42874e-12
ENSMUSG00000032006	Pdgfd	2.04548	2.8991e-11
ENSMUSG00000000753	Serpinf1	2.05857	2.38516e-09
ENSMUSG00000020676	Ccl11	2.06552	1.9998e-06
ENSMUSG00000037095	Lrg1	2.09856	4.58997e-29
ENSMUSG00000019929	Dcn	2.12323	1.64919e-32
ENSMUSG00000028583	Pdpn	2.16581	2.98237e-07
ENSMUSG00000042379	Esm1	2.17593	8.25549e-09
ENSMUSG00000037362	Nov	2.21768	2.4178e-09
ENSMUSG00000045092	S1pr1	2.22385	3.01429e-06
ENSMUSG00000031740	Mmp2	2.25507	6.52622e-06
ENSMUSG00000030123	Plxnd1	2.27715	8.75746e-26
ENSMUSG00000022469	Rapgef3	2.35939	1.08707e-11
ENSMUSG00000061353	Cxcl12	2.36433	2.49523e-26
ENSMUSG00000029648	Flt1	2.36664	7.02498e-21
ENSMUSG00000021367	Edn1	2.41259	3.96055e-09
ENSMUSG00000020357	Flt4	2.4254	1.05371e-15
ENSMUSG00000023885	Thbs2	2.45146	4.32248e-05
ENSMUSG00000031465	Angpt2	2.50388	7.90606e-16
ENSMUSG00000046186	Cd109	2.53206	1.591e-32
ENSMUSG00000020053	Igf1	2.55845	2.5713e-13
ENSMUSG00000042286	Stab1	2.56044	1.54905e-28
ENSMUSG00000015468	Notch4	2.59045	8.61734e-25
ENSMUSG00000060188	Cxcl17	2.59658	6.30874e-11
ENSMUSG00000023078	Cxcl13	2.59967	0.00320005
ENSMUSG00000073599	Ecscr	2.64211	1.08856e-36
ENSMUSG00000009097	Tbx1	2.64931	0.00126015
ENSMUSG00000021256	Vash1	2.69418	9.25157e-08
ENSMUSG00000063632	Sox11	2.70145	0.00100773
ENSMUSG00000028339	Col15a1	2.77067	2.93079e-38
ENSMUSG00000028664	Ephb2	2.79165	1.01889e-06
ENSMUSG00000006386	Tek	2.88608	9.22132e-22
ENSMUSG00000044317	Gpr4	2.89162	1.09006e-13
ENSMUSG00000090698	Apold1	2.92444	1.33909e-14
ENSMUSG00000031990	Jam3	2.95189	5.84327e-07
ENSMUSG00000042607	Asb4	2.96704	9.73051e-05
ENSMUSG00000017969	Ptgis	3.02772	2.64565e-05
ENSMUSG00000015053	Gata2	3.12237	4.75757e-22
ENSMUSG00000026814	Eng	3.23719	8.73711e-79
ENSMUSG00000039519	Cyp7b1	3.25159	2.85795e-08
ENSMUSG00000027314	Dll4	3.2615	9.40997e-38
ENSMUSG00000016494	Cd34	3.34044	7.04683e-60
ENSMUSG00000062960	Kdr	3.47984	2.95273e-52
ENSMUSG00000020717	Pecam1	3.49175	1.10107e-84
ENSMUSG00000000320	Alox12	3.51095	4.06111e-06
ENSMUSG00000030043	Tacr1	3.52888	1.94361e-33
ENSMUSG00000001506	Col1a1	3.56686	2.53399e-08
ENSMUSG00000024395	Lims2	3.57866	9.39247e-12
ENSMUSG00000029661	Col1a2	3.59333	1.19787e-08
ENSMUSG00000020154	Ptprb	3.69022	5.33651e-51
ENSMUSG00000031871	Cdh5	3.70371	6.54506e-78
ENSMUSG00000052921	Arhgef15	3.79621	2.24459e-40
ENSMUSG00000001240	Ramp2	3.8115	1.01161e-46
ENSMUSG00000036144	Meox2	3.82812	1.82413e-16
ENSMUSG00000057123	Gja5	3.85001	1.58427e-21
ENSMUSG00000031841	Cdh13	3.8808	1.56377e-69
ENSMUSG00000044562	Rasip1	3.89833	2.65671e-48
ENSMUSG00000021702	Thbs4	3.90566	1.05275e-15
ENSMUSG00000050234	Gja4	3.9181	2.84107e-38
ENSMUSG00000004655	Aqp1	3.91978	1.06763e-59
ENSMUSG00000033191	Tie1	3.9413	1.5283e-77
ENSMUSG00000032125	Robo4	3.94544	1.0532e-82
ENSMUSG00000046470	Sox18	4.06866	1.37346e-38
ENSMUSG00000041445	Mmrn2	4.14331	6.37011e-117
ENSMUSG00000026921	Egfl7	4.28579	1.48581e-163
ENSMUSG00000028978	Nos3	4.63072	6.53291e-59
ENSMUSG00000025902	Sox17	4.73081	6.23767e-26
ENSMUSG00000038700	Hoxb5	5.85993	0.000225068
ENSMUSG00000074934	Grem1	5.95949	3.87759e-06
ENSMUSG00000027460	Angpt4	6.12016	6.87494e-05
ENSMUSG00000030017	Reg3g	6.60322	5.86532e-05
Cell migration
ENSMUSG00000053399	Adamts18	-3.60333	0.00215897
ENSMUSG00000033831	Fgb	-3.17492	2.4252e-12
ENSMUSG00000050272	Dscam	-2.89628	0.00257771
ENSMUSG00000026770	Il2ra	-2.74356	0.00599611
ENSMUSG00000026700	Tnfsf4	-2.72587	0.00303398
ENSMUSG00000026573	Xcl1	-2.58931	0.00232127
ENSMUSG00000028927	Padi2	-2.47717	1.3897e-05
ENSMUSG00000074715	Ccl28	-2.30969	1.0305e-05
ENSMUSG00000015355	Cd48	-2.29169	0.00267261
ENSMUSG00000031165	Was	-2.25698	0.0047091
ENSMUSG00000034116	Vav1	-2.17079	0.00125652
ENSMUSG00000004709	Cd244	-2.10801	0.00471804
ENSMUSG00000001444	Tbx21	-2.07255	0.00786219
ENSMUSG00000051397	Tacstd2	-2.05582	6.18006e-09
ENSMUSG00000020573	Pik3cg	-2.0181	0.00137023
ENSMUSG00000025161	Slc16a3	-2.01456	1.00768e-06
ENSMUSG00000028341	Nr4a3	-2.00444	0.00377241
ENSMUSG00000057880	Abat	-1.8794	0.00145228
ENSMUSG00000078566	Bnip3	-1.85965	8.77012e-11
ENSMUSG00000029245	Epha5	-1.84532	0.00315692
ENSMUSG00000025207	Sema4g	-1.83543	0.000473598
ENSMUSG00000022033	Pbk	-1.81492	0.00204014
ENSMUSG00000000385	Tmprss2	-1.75822	0.000250743
ENSMUSG00000055333	Fat2	-1.7504	5.18838e-10
ENSMUSG00000042793	Lgr6	-1.71172	1.7762e-08
ENSMUSG00000031551	Ido1	-1.70553	9.05767e-05
ENSMUSG00000024109	Nrxn1	-1.68292	3.188e-06
ENSMUSG00000005672	Kit	-1.59624	1.1377e-20
ENSMUSG00000030413	Pglyrp1	-1.51045	8.01018e-07
ENSMUSG00000028289	Epha7	-1.49918	1.59195e-27
ENSMUSG00000031389	Arhgap4	-1.49623	0.0040964
ENSMUSG00000033730	Egr3	-1.46706	6.7713e-10
ENSMUSG00000063531	Sema3e	-1.38722	0.0001043
ENSMUSG00000023951	Vegfa	-1.3628	6.82995e-21
ENSMUSG00000022309	Angpt1	-1.34039	0.00285126
ENSMUSG00000024795	Kif20b	-1.32753	0.000117691
ENSMUSG00000026576	Atp1b1	-1.28319	4.15292e-14
ENSMUSG00000023034	Nr4a1	-1.27225	1.77553e-09
ENSMUSG00000022883	Robo1	-1.2022	1.28545e-09
ENSMUSG00000068748	Ptprz1	-1.1948	2.58675e-05
ENSMUSG00000039145	Camk1d	-1.18963	0.00340958
ENSMUSG00000051379	Flrt3	-1.17626	1.99804e-08
ENSMUSG00000028885	Smpdl3b	-1.14038	0.000194001
ENSMUSG00000026764	Kif5c	-1.13526	0.00647312
ENSMUSG00000030257	Srgap3	-1.09353	2.70896e-12
ENSMUSG00000074272	Ceacam1	-1.03994	3.75515e-14
ENSMUSG00000021262	Evl	-1.02934	0.00764605
ENSMUSG00000032238	Rora	-1.02711	0.000127937
ENSMUSG00000032496	Ltf	-1.02254	0.00125194
ENSMUSG00000022676	Snai2	-1.01393	0.000506859
ENSMUSG00000071856	Mcc	-0.997635	2.45697e-07
ENSMUSG00000039481	Nrtn	-0.974219	0.00825141
ENSMUSG00000042190	Cmklr1	-0.972546	3.99445e-05
ENSMUSG00000054717	Hmgb2	-0.969456	0.00067223
ENSMUSG00000002489	Tiam1	-0.966893	1.77619e-08
ENSMUSG00000028780	Sema3c	-0.958223	0.00323827
ENSMUSG00000021678	F2rl1	-0.928303	0.000326567
ENSMUSG00000027111	Itga6	-0.910407	6.95686e-08
ENSMUSG00000018569	Cldn7	-0.909176	5.66955e-12
ENSMUSG00000020189	Osbpl8	-0.89268	1.87181e-05
ENSMUSG00000004151	Etv1	-0.859284	0.0011256
ENSMUSG00000041688	Amot	-0.855119	0.000139572
ENSMUSG00000010051	Hyal1	-0.846843	0.00650226
ENSMUSG00000026064	Ptp4a1	-0.842258	3.52023e-07
ENSMUSG00000040152	Thbs1	-0.83637	3.27027e-07
ENSMUSG00000039910	Cited2	-0.834888	1.68643e-10
ENSMUSG00000032702	Kank1	-0.820108	4.48244e-05
ENSMUSG00000069601	Ank3	-0.819191	0.0068842
ENSMUSG00000025314	Ptprj	-0.809057	4.42275e-06
ENSMUSG00000032501	Trib1	-0.793288	6.7665e-08
ENSMUSG00000039942	Ptger4	-0.793093	0.00014894
ENSMUSG00000026674	Ddr2	-0.782768	4.17608e-07
ENSMUSG00000037411	Serpine1	-0.76073	1.62694e-05
ENSMUSG00000053475	Tnfaip6	-0.742842	0.00348025
ENSMUSG00000037868	Egr2	-0.738917	0.000562918
ENSMUSG00000052085	Dock8	-0.737939	0.00126313
ENSMUSG00000035236	Scai	-0.735299	0.00014606
ENSMUSG00000051412	Vamp7	-0.722344	0.00094728
ENSMUSG00000022200	Golph3	-0.709925	1.88902e-07
ENSMUSG00000026185	Igfbp5	-0.707129	1.90677e-05
ENSMUSG00000015766	Eps8	-0.695312	5.57519e-08
ENSMUSG00000028434	Epb41l4b	-0.680857	3.97034e-08
ENSMUSG00000002413	Braf	-0.668871	0.000772828
ENSMUSG00000015605	Srf	-0.659362	9.8867e-07
ENSMUSG00000028195	Cyr61	-0.650862	1.02384e-11
ENSMUSG00000041417	Pik3r1	-0.649571	5.43992e-07
ENSMUSG00000038894	Irs2	-0.647373	0.00124273
ENSMUSG00000029032	Arhgef16	-0.639835	0.000122557
ENSMUSG00000014932	Yes1	-0.634352	0.00277517
ENSMUSG00000007613	Tgfbr1	-0.625635	0.000835094
ENSMUSG00000022687	Boc	-0.623147	1.45984e-06
ENSMUSG00000028228	Cpne3	-0.622779	1.02171e-06
ENSMUSG00000024486	Hbegf	-0.616455	4.92296e-05
ENSMUSG00000029238	Clock	-0.597005	0.000387681
ENSMUSG00000022812	Gsk3b	-0.586881	1.47404e-05
ENSMUSG00000024290	Rock1	-0.565576	0.000538927
ENSMUSG00000020594	Pum2	-0.561562	5.43905e-06
ENSMUSG00000037921	Ddx60	-0.552654	9.98024e-05
ENSMUSG00000029826	Zc3hav1	-0.551652	0.0081343
ENSMUSG00000020859	Spag9	-0.542306	0.000224984
ENSMUSG00000021109	Hif1a	-0.531436	0.00405927
ENSMUSG00000050965	Prkca	-0.529226	0.000155781
ENSMUSG00000029512	Ulk1	-0.529039	5.77083e-06
ENSMUSG00000000275	Trim25	-0.521183	1.76676e-05
ENSMUSG00000024122	Pdpk1	-0.514868	0.00081119
ENSMUSG00000008575	Nfib	-0.513119	0.00632473
ENSMUSG00000032902	Slc16a1	-0.50451	0.000358997
ENSMUSG00000020063	Sirt1	-0.500882	0.00473315
ENSMUSG00000027087	Itgav	-0.49413	1.0378e-06
ENSMUSG00000035725	Prkx	-0.481549	0.00436423
ENSMUSG00000006740	Kif5b	-0.469788	0.00139055
ENSMUSG00000027164	Traf6	-0.453931	0.00222344
ENSMUSG00000022911	Arl13b	-0.453656	0.00134512
ENSMUSG00000027598	Itch	-0.44134	1.77292e-05
ENSMUSG00000020733	Slc9a3r1	-0.432382	0.000552037
ENSMUSG00000048915	Efna5	-0.426582	0.00692672
ENSMUSG00000004040	Stat3	-0.397592	0.00269101
ENSMUSG00000032340	Neo1	-0.395006	0.00664154
ENSMUSG00000020644	Id2	-0.391693	0.000306483
ENSMUSG00000006932	Ctnnb1	-0.384046	0.0010481
ENSMUSG00000020745	Pafah1b1	-0.383028	4.83469e-05
ENSMUSG00000024096	Ralbp1	-0.380908	0.00171113
ENSMUSG00000027665	Pik3ca	-0.374743	0.00283187
ENSMUSG00000061130	Ppm1b	-0.372325	0.00324859
ENSMUSG00000032633	Flcn	-0.372089	0.00233714
ENSMUSG00000003131	Pafah1b2	-0.367594	0.000938557
ENSMUSG00000024913	Lrp5	-0.363476	0.00254213
ENSMUSG00000020516	Rps6kb1	-0.356768	0.00431919
ENSMUSG00000028580	Pum1	-0.347819	0.00215822
ENSMUSG00000054364	Rhob	-0.325866	0.00840596
ENSMUSG00000030530	Furin	-0.301853	0.00842866
ENSMUSG00000025130	P4hb	-0.299372	0.0036274
ENSMUSG00000019804	Snx3	0.286253	0.004556
ENSMUSG00000063065	Mapk3	0.323403	0.00824409
ENSMUSG00000030774	Pak1	0.400117	0.00678213
ENSMUSG00000029071	Dvl1	0.412374	0.00338951
ENSMUSG00000015714	Cers2	0.420482	6.45818e-05
ENSMUSG00000063856	Gpx1	0.422732	0.00980262
ENSMUSG00000025499	Hras	0.424697	0.00215692
ENSMUSG00000005779	Psmb4	0.433355	0.000518463
ENSMUSG00000001123	Lgals9	0.441148	0.000192301
ENSMUSG00000026425	Srgap2	0.442999	0.000667519
ENSMUSG00000064210	Ano6	0.45137	0.000787603
ENSMUSG00000030341	Tnfrsf1a	0.473455	4.84141e-05
ENSMUSG00000000555	Itga5	0.482705	0.000204318
ENSMUSG00000026104	Stat1	0.48612	0.000269441
ENSMUSG00000031146	Plp2	0.490791	0.00187129
ENSMUSG00000024163	Mapk8ip3	0.491859	0.00357254
ENSMUSG00000031511	Arhgef7	0.506715	0.000259919
ENSMUSG00000015837	Sqstm1	0.506809	3.27853e-05
ENSMUSG00000011658	Fuz	0.513872	0.00289869
ENSMUSG00000035960	Apex1	0.519379	0.0014788
ENSMUSG00000060803	Gstp1	0.541521	0.00268963
ENSMUSG00000005087	Cd44	0.54807	1.42485e-05
ENSMUSG00000026641	Usf1	0.552059	0.000186932
ENSMUSG00000015619	Gata3	0.553957	0.00231734
ENSMUSG00000038260	Trpm4	0.563632	0.00117539
ENSMUSG00000015647	Lama5	0.566702	0.0039676
ENSMUSG00000028041	Adam15	0.579577	3.23407e-05
ENSMUSG00000022146	Osmr	0.597075	3.90704e-06
ENSMUSG00000060591	Ifitm2	0.611631	3.84362e-08
ENSMUSG00000026836	Acvr1	0.61982	4.48244e-05
ENSMUSG00000021756	Il6st	0.62267	2.31622e-08
ENSMUSG00000026181	Ppm1f	0.624189	5.1758e-06
ENSMUSG00000061731	Ext1	0.626687	0.000125953
ENSMUSG00000041939	Mvk	0.62858	0.00950596
ENSMUSG00000022475	Hdac7	0.637054	0.000201937
ENSMUSG00000022636	Alcam	0.644561	0.00399324
ENSMUSG00000053113	Socs3	0.649231	1.28197e-07
ENSMUSG00000031207	Msn	0.6524	1.16103e-06
ENSMUSG00000004451	Ralb	0.653716	7.00464e-07
ENSMUSG00000032359	Ctsh	0.672106	0.000131525
ENSMUSG00000023051	Tarbp2	0.677258	0.00285127
ENSMUSG00000059895	Ptp4a3	0.69683	9.79183e-05
ENSMUSG00000025351	Cd63	0.704645	4.75036e-06
ENSMUSG00000026193	Fn1	0.708912	0.00277517
ENSMUSG00000031548	Sfrp1	0.713953	0.00323011
ENSMUSG00000020455	Trim11	0.714152	6.11011e-09
ENSMUSG00000041845	Rhod	0.720437	0.0016473
ENSMUSG00000026249	Serpine2	0.735301	3.86007e-09
ENSMUSG00000040447	Spns2	0.740659	0.000225132
ENSMUSG00000024659	Anxa1	0.750773	0.000358181
ENSMUSG00000046718	Bst2	0.761982	1.55591e-09
ENSMUSG00000055322	Tns1	0.763136	0.00168843
ENSMUSG00000010047	Hyal2	0.76465	0.000184574
ENSMUSG00000040952	Rps19	0.775529	5.47507e-05
ENSMUSG00000027712	Anxa5	0.806343	1.82327e-07
ENSMUSG00000022505	Emp2	0.809759	1.90246e-13
ENSMUSG00000029207	Apbb2	0.812597	8.94901e-08
ENSMUSG00000025492	Ifitm3	0.814284	1.97357e-21
ENSMUSG00000037499	Nenf	0.815655	8.72087e-05
ENSMUSG00000029231	Pdgfra	0.817162	0.00498144
ENSMUSG00000031402	Mpp1	0.818697	4.47533e-06
ENSMUSG00000031778	Cx3cl1	0.826649	9.62983e-11
ENSMUSG00000031558	Slit2	0.827394	0.000447485
ENSMUSG00000028909	Ptpru	0.829962	0.00283433
ENSMUSG00000031955	Bcar1	0.867792	3.88668e-07
ENSMUSG00000017446	C1qtnf1	0.871693	1.10513e-05
ENSMUSG00000061119	Prcp	0.879007	0.000906242
ENSMUSG00000024401	Tnf	0.891032	4.75181e-06
ENSMUSG00000041736	Tspo	0.894918	1.28888e-09
ENSMUSG00000004951	Hspb1	0.894926	5.51478e-08
ENSMUSG00000001300	Efnb2	0.896164	0.000176866
ENSMUSG00000014599	Csf1	0.897024	5.0409e-11
ENSMUSG00000056121	Fez2	0.907524	1.189e-06
ENSMUSG00000032231	Anxa2	0.918627	8.3463e-06
ENSMUSG00000025494	Sigirr	0.92001	4.45332e-07
ENSMUSG00000000957	Mmp14	0.93177	5.41011e-05
ENSMUSG00000024810	Il33	0.959036	0.00109793
ENSMUSG00000029022	Miip	0.96632	6.78038e-05
ENSMUSG00000062991	Nrg1	0.975129	0.00341831
ENSMUSG00000022385	Gtse1	0.981603	2.0955e-10
ENSMUSG00000038058	Nod1	1.0191	2.34024e-06
ENSMUSG00000029417	Cxcl9	1.03552	8.34344e-05
ENSMUSG00000029304	Spp1	1.05841	2.14193e-05
ENSMUSG00000029380	Cxcl1	1.07503	5.37965e-09
ENSMUSG00000002900	Lamb1	1.0865	1.67553e-09
ENSMUSG00000028039	Efna3	1.1238	0.00829363
ENSMUSG00000027954	Efna1	1.19024	1.08869e-16
ENSMUSG00000029484	Anxa3	1.20939	6.60443e-08
ENSMUSG00000027832	Ptx3	1.21195	1.10864e-07
ENSMUSG00000031451	Gas6	1.21424	8.51722e-27
ENSMUSG00000020262	Adarb1	1.24402	1.28425e-13
ENSMUSG00000016024	Lbp	1.26674	1.90167e-17
ENSMUSG00000008734	Gprc5b	1.29138	3.94641e-07
ENSMUSG00000000958	Slc7a7	1.29403	0.000108233
ENSMUSG00000042284	Itga1	1.29622	2.98882e-06
ENSMUSG00000036856	Wnt4	1.29691	0.00519744
ENSMUSG00000032135	Mcam	1.31783	1.56856e-13
ENSMUSG00000029371	Cxcl5	1.36874	0.000545877
ENSMUSG00000031712	Il15	1.38635	4.08212e-10
ENSMUSG00000006205	Htra1	1.38809	0.000103371
ENSMUSG00000053062	Jam2	1.39147	1.48891e-06
ENSMUSG00000021390	Ogn	1.40295	0.000296253
ENSMUSG00000000530	Acvrl1	1.41373	7.79152e-09
ENSMUSG00000027962	Vcam1	1.41378	2.95747e-20
ENSMUSG00000062515	Fabp4	1.42175	8.73807e-05
ENSMUSG00000001435	Col18a1	1.43198	4.54125e-20
ENSMUSG00000019278	Dpep1	1.4399	0.00142211
ENSMUSG00000048779	P2ry6	1.44585	0.000622775
ENSMUSG00000037936	Scarb1	1.44587	6.32565e-21
ENSMUSG00000030077	Chl1	1.47972	0.000299764
ENSMUSG00000001131	Timp1	1.48108	0.000177195
ENSMUSG00000060183	Cxcl11	1.51039	1.30926e-05
ENSMUSG00000031520	Vegfc	1.52552	1.66699e-13
ENSMUSG00000018593	Sparc	1.53936	1.10748e-08
ENSMUSG00000034205	Loxl2	1.5535	2.6213e-05
ENSMUSG00000028108	Ecm1	1.57556	2.02062e-10
ENSMUSG00000033149	Phldb2	1.59702	0.000274848
ENSMUSG00000031538	Plat	1.60472	4.41655e-08
ENSMUSG00000027996	Sfrp2	1.62598	2.88249e-08
ENSMUSG00000022150	Dab2	1.63469	6.05779e-10
ENSMUSG00000028600	Podn	1.64273	4.56472e-05
ENSMUSG00000038668	Lpar1	1.651	0.000187923
ENSMUSG00000007655	Cav1	1.66191	1.91923e-36
ENSMUSG00000022367	Has2	1.6636	1.14861e-05
ENSMUSG00000033278	Ptprm	1.67801	4.58491e-15
ENSMUSG00000050335	Lgals3	1.67944	1.48041e-10
ENSMUSG00000024164	C3	1.75722	6.81585e-05
ENSMUSG00000030562	Nox4	1.76882	6.28407e-08
ENSMUSG00000025969	Nrp2	1.76923	1.82099e-21
ENSMUSG00000014813	Stc1	1.77531	1.6347e-06
ENSMUSG00000020682	Mmp28	1.77549	0.00318228
ENSMUSG00000097328	Tnfsf12	1.78668	0.000941095
ENSMUSG00000027208	Fgf7	1.79398	0.00521466
ENSMUSG00000026640	Plxna2	1.79846	5.8117e-11
ENSMUSG00000028883	Sema3a	1.87282	0.000941095
ENSMUSG00000025608	Podxl	1.90332	5.0728e-31
ENSMUSG00000000489	Pdgfb	1.9119	9.19562e-20
ENSMUSG00000020121	Srgap1	1.92799	2.70979e-07
ENSMUSG00000037379	Spon2	1.97025	0.000319607
ENSMUSG00000026109	Tmeff2	1.97954	0.00199715
ENSMUSG00000016918	Sulf1	1.9964	2.33589e-08
ENSMUSG00000056427	Slit3	2.0033	2.20294e-11
ENSMUSG00000027611	Procr	2.00736	8.37595e-10
ENSMUSG00000026494	Kif26b	2.00849	3.01448e-06
ENSMUSG00000022548	Apod	2.02684	4.42874e-12
ENSMUSG00000032006	Pdgfd	2.04548	2.8991e-11
ENSMUSG00000000753	Serpinf1	2.05857	2.38516e-09
ENSMUSG00000020676	Ccl11	2.06552	1.9998e-06
ENSMUSG00000032860	P2ry2	2.06739	5.48809e-08
ENSMUSG00000009281	Rarres2	2.10193	1.35377e-08
ENSMUSG00000034684	Sema3f	2.10386	3.11986e-25
ENSMUSG00000019929	Dcn	2.12323	1.64919e-32
ENSMUSG00000041120	Nbl1	2.15248	3.84927e-15
ENSMUSG00000026785	Pkn3	2.162	4.63821e-18
ENSMUSG00000019194	Scn1b	2.18018	8.28058e-19
ENSMUSG00000037362	Nov	2.21768	2.4178e-09
ENSMUSG00000045092	S1pr1	2.22385	3.01429e-06
ENSMUSG00000030123	Plxnd1	2.27715	8.75746e-26
ENSMUSG00000038264	Sema7a	2.29868	7.9809e-15
ENSMUSG00000023224	Serping1	2.30322	1.12187e-20
ENSMUSG00000022469	Rapgef3	2.35939	1.08707e-11
ENSMUSG00000061353	Cxcl12	2.36433	2.49523e-26
ENSMUSG00000029648	Flt1	2.36664	7.02498e-21
ENSMUSG00000021367	Edn1	2.41259	3.96055e-09
ENSMUSG00000020357	Flt4	2.4254	1.05371e-15
ENSMUSG00000021508	Cxcl14	2.4392	1.40584e-13
ENSMUSG00000020810	Cygb	2.47373	9.93914e-13
ENSMUSG00000031465	Angpt2	2.50388	7.90606e-16
ENSMUSG00000025586	Cpeb1	2.5086	0.00322096
ENSMUSG00000046186	Cd109	2.53206	1.591e-32
ENSMUSG00000026442	Nfasc	2.53348	8.65103e-09
ENSMUSG00000020053	Igf1	2.55845	2.5713e-13
ENSMUSG00000009185	Ccl8	2.57048	0.000206243
ENSMUSG00000074743	Thbd	2.57621	8.90429e-20
ENSMUSG00000060188	Cxcl17	2.59658	6.30874e-11
ENSMUSG00000023078	Cxcl13	2.59967	0.00320005
ENSMUSG00000073599	Ecscr	2.64211	1.08856e-36
ENSMUSG00000009097	Tbx1	2.64931	0.00126015
ENSMUSG00000038188	Scarf1	2.67541	1.13688e-24
ENSMUSG00000021256	Vash1	2.69418	9.25157e-08
ENSMUSG00000000120	Ngfr	2.76087	0.000169106
ENSMUSG00000028664	Ephb2	2.79165	1.01889e-06
ENSMUSG00000006386	Tek	2.88608	9.22132e-22
ENSMUSG00000062380	Tubb3	2.91693	9.84111e-21
ENSMUSG00000031990	Jam3	2.95189	5.84327e-07
ENSMUSG00000041559	Fmod	2.95462	8.41832e-08
ENSMUSG00000042453	Reln	2.96454	0.00221222
ENSMUSG00000017969	Ptgis	3.02772	2.64565e-05
ENSMUSG00000006369	Fbln1	3.06652	4.00708e-26
ENSMUSG00000052316	Lrrc15	3.23032	8.36851e-05
ENSMUSG00000026814	Eng	3.23719	8.73711e-79
ENSMUSG00000027314	Dll4	3.2615	9.40997e-38
ENSMUSG00000026890	Lhx6	3.27898	2.24292e-13
ENSMUSG00000016494	Cd34	3.34044	7.04683e-60
ENSMUSG00000029765	Plxna4	3.40535	1.8112e-06
ENSMUSG00000058914	C1qtnf3	3.41956	8.79776e-13
ENSMUSG00000024451	Arap3	3.41964	7.28066e-49
ENSMUSG00000062960	Kdr	3.47984	2.95273e-52
ENSMUSG00000020717	Pecam1	3.49175	1.10107e-84
ENSMUSG00000000320	Alox12	3.51095	4.06111e-06
ENSMUSG00000034845	Plvap	3.51144	7.56432e-69
ENSMUSG00000030043	Tacr1	3.52888	1.94361e-33
ENSMUSG00000001506	Col1a1	3.56686	2.53399e-08
ENSMUSG00000029661	Col1a2	3.59333	1.19787e-08
ENSMUSG00000001227	Sema6b	3.73339	3.95759e-24
ENSMUSG00000031841	Cdh13	3.8808	1.56377e-69
ENSMUSG00000021702	Thbs4	3.90566	1.05275e-15
ENSMUSG00000033191	Tie1	3.9413	1.5283e-77
ENSMUSG00000026580	Selp	4.0191	1.40684e-49
ENSMUSG00000046470	Sox18	4.06866	1.37346e-38
ENSMUSG00000053004	Hrh1	4.07762	0.00366791
ENSMUSG00000026582	Sele	4.08631	2.55019e-15
ENSMUSG00000001946	Esam	4.0913	2.04004e-79
ENSMUSG00000041445	Mmrn2	4.14331	6.37011e-117
ENSMUSG00000021194	Chga	4.28949	0.000128551
ENSMUSG00000020875	Hoxb9	4.53854	1.11536e-05
ENSMUSG00000028978	Nos3	4.63072	6.53291e-59
ENSMUSG00000025902	Sox17	4.73081	6.23767e-26
ENSMUSG00000020151	Ptprr	5.51273	0.00608314
ENSMUSG00000074934	Grem1	5.95949	3.87759e-06
ENSMUSG00000027460	Angpt4	6.12016	6.87494e-05
Cell adhesion
ENSMUSG00000008153	Clstn3	-3.70231	0.00588906
ENSMUSG00000053399	Adamts18	-3.60333	0.00215897
ENSMUSG00000033831	Fgb	-3.17492	2.4252e-12
ENSMUSG00000032021	Crtam	-2.95246	0.00745991
ENSMUSG00000050272	Dscam	-2.89628	0.00257771
ENSMUSG00000026770	Il2ra	-2.74356	0.00599611
ENSMUSG00000026700	Tnfsf4	-2.72587	0.00303398
ENSMUSG00000026573	Xcl1	-2.58931	0.00232127
ENSMUSG00000074715	Ccl28	-2.30969	1.0305e-05
ENSMUSG00000047230	Cldn2	-2.10564	4.10941e-16
ENSMUSG00000051397	Tacstd2	-2.05582	6.18006e-09
ENSMUSG00000024696	Lpxn	-1.98966	0.00709974
ENSMUSG00000032076	Cadm1	-1.97993	2.19692e-13
ENSMUSG00000057880	Abat	-1.8794	0.00145228
ENSMUSG00000055333	Fat2	-1.7504	5.18838e-10
ENSMUSG00000031551	Ido1	-1.70553	9.05767e-05
ENSMUSG00000024109	Nrxn1	-1.68292	3.188e-06
ENSMUSG00000027699	Ect2	-1.63464	0.000104873
ENSMUSG00000030671	Pde3b	-1.57705	0.00475205
ENSMUSG00000030413	Pglyrp1	-1.51045	8.01018e-07
ENSMUSG00000021803	Cdhr1	-1.48864	6.89488e-12
ENSMUSG00000063531	Sema3e	-1.38722	0.0001043
ENSMUSG00000027508	Pag1	-1.37004	0.00407022
ENSMUSG00000023951	Vegfa	-1.3628	6.82995e-21
ENSMUSG00000022309	Angpt1	-1.34039	0.00285126
ENSMUSG00000055421	Pcdh9	-1.3045	1.78434e-05
ENSMUSG00000022883	Robo1	-1.2022	1.28545e-09
ENSMUSG00000068748	Ptprz1	-1.1948	2.58675e-05
ENSMUSG00000030124	Lag3	-1.17214	5.6421e-05
ENSMUSG00000022512	Cldn1	-1.10253	2.14759e-05
ENSMUSG00000016028	Celsr1	-1.0785	1.50083e-07
ENSMUSG00000006219	Fblim1	-1.06016	8.56098e-12
ENSMUSG00000074272	Ceacam1	-1.03994	3.75515e-14
ENSMUSG00000022676	Snai2	-1.01393	0.000506859
ENSMUSG00000020134	Peli1	-0.927823	2.29436e-09
ENSMUSG00000027111	Itga6	-0.910407	6.95686e-08
ENSMUSG00000018569	Cldn7	-0.909176	5.66955e-12
ENSMUSG00000040998	Npnt	-0.882995	0.000129098
ENSMUSG00000061527	Krt5	-0.88	5.67124e-09
ENSMUSG00000041688	Amot	-0.855119	0.000139572
ENSMUSG00000040152	Thbs1	-0.83637	3.27027e-07
ENSMUSG00000032702	Kank1	-0.820108	4.48244e-05
ENSMUSG00000025314	Ptprj	-0.809057	4.42275e-06
ENSMUSG00000044303	Cdkn2a	-0.799446	8.3022e-05
ENSMUSG00000037411	Serpine1	-0.76073	1.62694e-05
ENSMUSG00000040690	Col16a1	-0.756324	0.00165956
ENSMUSG00000034488	Edil3	-0.751952	0.00741656
ENSMUSG00000029580	Actb	-0.675443	3.48925e-05
ENSMUSG00000002413	Braf	-0.668871	0.000772828
ENSMUSG00000015605	Srf	-0.659362	9.8867e-07
ENSMUSG00000028195	Cyr61	-0.650862	1.02384e-11
ENSMUSG00000041417	Pik3r1	-0.649571	5.43992e-07
ENSMUSG00000026977	March7	-0.63392	3.31344e-07
ENSMUSG00000019818	Cd164	-0.610922	2.34554e-07
ENSMUSG00000020612	Prkar1a	-0.610457	2.48017e-06
ENSMUSG00000022812	Gsk3b	-0.586881	1.47404e-05
ENSMUSG00000024290	Rock1	-0.565576	0.000538927
ENSMUSG00000050965	Prkca	-0.529226	0.000155781
ENSMUSG00000062825	Actg1	-0.523515	0.000176898
ENSMUSG00000024122	Pdpk1	-0.514868	0.00081119
ENSMUSG00000021112	Mpp5	-0.505715	0.00478594
ENSMUSG00000037643	Prkci	-0.505156	0.000829229
ENSMUSG00000040511	Pvr	-0.455354	0.000247073
ENSMUSG00000026479	Lamc2	-0.455215	0.00130585
ENSMUSG00000024077	Strn	-0.447402	0.00652921
ENSMUSG00000027598	Itch	-0.44134	1.77292e-05
ENSMUSG00000048915	Efna5	-0.426582	0.00692672
ENSMUSG00000020644	Id2	-0.391693	0.000306483
ENSMUSG00000006932	Ctnnb1	-0.384046	0.0010481
ENSMUSG00000032633	Flcn	-0.372089	0.00233714
ENSMUSG00000051790	Nlgn2	-0.361946	0.00532899
ENSMUSG00000039953	Clstn1	-0.359611	0.00444926
ENSMUSG00000020827	Mink1	0.2711	0.00541235
ENSMUSG00000033088	Triobp	0.355063	0.00924333
ENSMUSG00000031078	Cttn	0.417523	0.0019153
ENSMUSG00000001123	Lgals9	0.441148	0.000192301
ENSMUSG00000030342	Cd9	0.459314	0.000134604
ENSMUSG00000000555	Itga5	0.482705	0.000204318
ENSMUSG00000031511	Arhgef7	0.506715	0.000259919
ENSMUSG00000079037	Prnp	0.519193	0.000103061
ENSMUSG00000015647	Lama5	0.566702	0.0039676
ENSMUSG00000075254	Heg1	0.57811	9.77239e-05
ENSMUSG00000028041	Adam15	0.579577	3.23407e-05
ENSMUSG00000026181	Ppm1f	0.624189	5.1758e-06
ENSMUSG00000022475	Hdac7	0.637054	0.000201937
ENSMUSG00000022636	Alcam	0.644561	0.00399324
ENSMUSG00000002233	Rhoc	0.681986	4.91553e-06
ENSMUSG00000025510	Cd151	0.684944	6.38087e-11
ENSMUSG00000053559	Smagp	0.706685	0.00340629
ENSMUSG00000026193	Fn1	0.708912	0.00277517
ENSMUSG00000031548	Sfrp1	0.713953	0.00323011
ENSMUSG00000041845	Rhod	0.720437	0.0016473
ENSMUSG00000026249	Serpine2	0.735301	3.86007e-09
ENSMUSG00000037966	Ninj1	0.741607	0.000111634
ENSMUSG00000024659	Anxa1	0.750773	0.000358181
ENSMUSG00000055322	Tns1	0.763136	0.00168843
ENSMUSG00000024944	Arl2	0.796375	0.000167069
ENSMUSG00000022505	Emp2	0.809759	1.90246e-13
ENSMUSG00000049791	Fzd4	0.811825	0.00823471
ENSMUSG00000076441	Ass1	0.833705	6.07755e-08
ENSMUSG00000017446	C1qtnf1	0.871693	1.10513e-05
ENSMUSG00000014599	Csf1	0.897024	5.0409e-11
ENSMUSG00000000957	Mmp14	0.93177	5.41011e-05
ENSMUSG00000023036	Pcdhgc4	0.986348	1.63902e-06
ENSMUSG00000022661	Cd200	0.988777	6.61985e-15
ENSMUSG00000041959	S100a10	1.11928	4.40581e-08
ENSMUSG00000054855	Rnd1	1.16591	3.86922e-05
ENSMUSG00000031673	Cdh11	1.26918	0.0010481
ENSMUSG00000036856	Wnt4	1.29691	0.00519744
ENSMUSG00000036718	Micall2	1.31957	8.11079e-11
ENSMUSG00000022665	Ccdc80	1.36846	0.00104463
ENSMUSG00000053062	Jam2	1.39147	1.48891e-06
ENSMUSG00000000530	Acvrl1	1.41373	7.79152e-09
ENSMUSG00000027962	Vcam1	1.41378	2.95747e-20
ENSMUSG00000038007	Acer2	1.51414	6.22961e-12
ENSMUSG00000031520	Vegfc	1.52552	1.66699e-13
ENSMUSG00000002944	Cd36	1.53202	0.000330791
ENSMUSG00000005397	Nid1	1.59579	5.58099e-11
ENSMUSG00000033149	Phldb2	1.59702	0.000274848
ENSMUSG00000022367	Has2	1.6636	1.14861e-05
ENSMUSG00000033278	Ptprm	1.67801	4.58491e-15
ENSMUSG00000050335	Lgals3	1.67944	1.48041e-10
ENSMUSG00000051375	Pcdh1	1.76344	1.50995e-30
ENSMUSG00000039683	Sdk1	1.88742	0.00735325
ENSMUSG00000025608	Podxl	1.90332	5.0728e-31
ENSMUSG00000051076	Vtcn1	1.92879	4.59366e-06
ENSMUSG00000024044	Epb41l3	1.97627	0.00862875
ENSMUSG00000028364	Tnc	1.98638	0.000650174
ENSMUSG00000022548	Apod	2.02684	4.42874e-12
ENSMUSG00000043631	Ecm2	2.03917	4.59366e-06
ENSMUSG00000005338	Cadm3	2.11086	1.32914e-06
ENSMUSG00000041324	Inhba	2.13667	2.2156e-16
ENSMUSG00000039377	Hlx	2.18087	4.53959e-06
ENSMUSG00000035258	Abi3bp	2.2729	5.44593e-14
ENSMUSG00000061353	Cxcl12	2.36433	2.49523e-26
ENSMUSG00000031465	Angpt2	2.50388	7.90606e-16
ENSMUSG00000024440	Pcdh12	2.51454	5.18838e-10
ENSMUSG00000036862	Dchs1	2.52079	7.09756e-22
ENSMUSG00000026442	Nfasc	2.53348	8.65103e-09
ENSMUSG00000006386	Tek	2.88608	9.22132e-22
ENSMUSG00000023886	Smoc2	2.93114	1.1464e-15
ENSMUSG00000006369	Fbln1	3.06652	4.00708e-26
ENSMUSG00000062960	Kdr	3.47984	2.95273e-52
ENSMUSG00000000320	Alox12	3.51095	4.06111e-06
ENSMUSG00000001506	Col1a1	3.56686	2.53399e-08
ENSMUSG00000024395	Lims2	3.57866	9.39247e-12
ENSMUSG00000031871	Cdh5	3.70371	6.54506e-78
ENSMUSG00000001240	Ramp2	3.8115	1.01161e-46
ENSMUSG00000057123	Gja5	3.85001	1.58427e-21
ENSMUSG00000031841	Cdh13	3.8808	1.56377e-69
ENSMUSG00000041378	Cldn5	3.90821	3.97175e-32
ENSMUSG00000050234	Gja4	3.9181	2.84107e-38
ENSMUSG00000026580	Selp	4.0191	1.40684e-49
ENSMUSG00000026582	Sele	4.08631	2.55019e-15
ENSMUSG00000001946	Esam	4.0913	2.04004e-79
ENSMUSG00000074934	Grem1	5.95949	3.87759e-06
Extracellular matrix
ENSMUSG00000029306	Ibsp	-4.46225	8.03294e-06
ENSMUSG00000022483	Col2a1	-3.26595	0.000571662
ENSMUSG00000033831	Fgb	-3.17492	2.4252e-12
ENSMUSG00000028626	Col9a2	-2.29065	0.00304082
ENSMUSG00000026768	Itga8	-1.59972	1.92395e-05
ENSMUSG00000027966	Col11a1	-1.55983	3.94389e-13
ENSMUSG00000001249	Hpn	-1.54926	0.000203951
ENSMUSG00000056174	Col8a2	-1.46128	8.68055e-08
ENSMUSG00000058897	Col25a1	-1.42969	2.97413e-09
ENSMUSG00000031849	Comp	-1.40341	0.00275708
ENSMUSG00000016995	Matn4	-1.19117	0.000209745
ENSMUSG00000021831	Ero1l	-1.18327	7.51343e-08
ENSMUSG00000036040	Adamtsl2	-1.13228	0.00179785
ENSMUSG00000003051	Elf3	-1.08175	7.7046e-09
ENSMUSG00000019997	Ctgf	-1.00789	7.57723e-13
ENSMUSG00000038642	Ctss	-0.972689	0.0082607
ENSMUSG00000026147	Col9a1	-0.917286	1.97168e-06
ENSMUSG00000027111	Itga6	-0.910407	6.95686e-08
ENSMUSG00000034640	Tiparp	-0.909684	6.90916e-10
ENSMUSG00000040998	Npnt	-0.882995	0.000129098
ENSMUSG00000040152	Thbs1	-0.83637	3.27027e-07
ENSMUSG00000033792	Atp7a	-0.797679	0.000114024
ENSMUSG00000026674	Ddr2	-0.782768	4.17608e-07
ENSMUSG00000037411	Serpine1	-0.76073	1.62694e-05
ENSMUSG00000040690	Col16a1	-0.756324	0.00165956
ENSMUSG00000024330	Col11a2	-0.725545	0.00495855
ENSMUSG00000031273	Col4a6	-0.724721	0.00652921
ENSMUSG00000019916	P4ha1	-0.671216	4.53143e-05
ENSMUSG00000028195	Cyr61	-0.650862	1.02384e-11
ENSMUSG00000007613	Tgfbr1	-0.625635	0.000835094
ENSMUSG00000021109	Hif1a	-0.531436	0.00405927
ENSMUSG00000055737	Ghr	-0.521409	0.000247875
ENSMUSG00000027087	Itgav	-0.49413	1.0378e-06
ENSMUSG00000027570	Col9a3	-0.458687	0.0041892
ENSMUSG00000026479	Lamc2	-0.455215	0.00130585
ENSMUSG00000030530	Furin	-0.301853	0.00842866
ENSMUSG00000023944	Hsp90ab1	0.387247	9.93156e-05
ENSMUSG00000022817	Itgb5	0.389199	0.0019583
ENSMUSG00000021939	Ctsb	0.462249	0.000466511
ENSMUSG00000000555	Itga5	0.482705	0.000204318
ENSMUSG00000007891	Ctsd	0.482946	9.60075e-06
ENSMUSG00000059714	Flot1	0.489248	0.000286949
ENSMUSG00000001794	Capns1	0.498759	6.95454e-07
ENSMUSG00000031274	Col4a5	0.526994	0.00629523
ENSMUSG00000025225	Nfkb2	0.533775	0.000224984
ENSMUSG00000026509	Capn2	0.544312	7.8968e-05
ENSMUSG00000005087	Cd44	0.54807	1.42485e-05
ENSMUSG00000019846	Lama4	0.56211	0.00419201
ENSMUSG00000015647	Lama5	0.566702	0.0039676
ENSMUSG00000028041	Adam15	0.579577	3.23407e-05
ENSMUSG00000032966	Fkbp1a	0.589065	7.55046e-07
ENSMUSG00000006800	Sulf2	0.626532	3.25052e-06
ENSMUSG00000006403	Adamts4	0.630006	0.0021072
ENSMUSG00000026193	Fn1	0.708912	0.00277517
ENSMUSG00000022098	Bmp1	0.731948	0.000184574
ENSMUSG00000019987	Arg1	0.796339	0.000664903
ENSMUSG00000029207	Apbb2	0.812597	8.94901e-08
ENSMUSG00000056737	Capg	0.820488	2.8539e-05
ENSMUSG00000002020	Ltbp2	0.879923	0.00275242
ENSMUSG00000024401	Tnf	0.891032	4.75181e-06
ENSMUSG00000032231	Anxa2	0.918627	8.3463e-06
ENSMUSG00000000957	Mmp14	0.93177	5.41011e-05
ENSMUSG00000015850	Adamtsl4	1.01579	0.00208431
ENSMUSG00000021186	Fbln5	1.0349	0.000187008
ENSMUSG00000029304	Spp1	1.05841	2.14193e-05
ENSMUSG00000002900	Lamb1	1.0865	1.67553e-09
ENSMUSG00000057729	Prtn3	1.08911	0.00190243
ENSMUSG00000021614	Vcan	1.19164	0.00106221
ENSMUSG00000031451	Gas6	1.21424	8.51722e-27
ENSMUSG00000042284	Itga1	1.29622	2.98882e-06
ENSMUSG00000001119	Col6a1	1.34066	0.00231734
ENSMUSG00000024529	Lox	1.35632	0.000263165
ENSMUSG00000022665	Ccdc80	1.36846	0.00104463
ENSMUSG00000027204	Fbn1	1.37186	2.14449e-05
ENSMUSG00000022894	Adamts5	1.37965	0.00014894
ENSMUSG00000006205	Htra1	1.38809	0.000103371
ENSMUSG00000053062	Jam2	1.39147	1.48891e-06
ENSMUSG00000027962	Vcam1	1.41378	2.95747e-20
ENSMUSG00000020241	Col6a2	1.41612	0.00399685
ENSMUSG00000001435	Col18a1	1.43198	4.54125e-20
ENSMUSG00000063727	Tnfrsf11b	1.44331	0.000626257
ENSMUSG00000001131	Timp1	1.48108	0.000177195
ENSMUSG00000002944	Cd36	1.53202	0.000330791
ENSMUSG00000018593	Sparc	1.53936	1.10748e-08
ENSMUSG00000031503	Col4a2	1.54955	2.18438e-09
ENSMUSG00000034205	Loxl2	1.5535	2.6213e-05
ENSMUSG00000005397	Nid1	1.59579	5.58099e-11
ENSMUSG00000000901	Mmp11	1.62099	3.7321e-07
ENSMUSG00000027996	Sfrp2	1.62598	2.88249e-08
ENSMUSG00000018830	Myh11	1.65915	0.00971408
ENSMUSG00000022367	Has2	1.6636	1.14861e-05
ENSMUSG00000028763	Hspg2	1.68451	1.8494e-19
ENSMUSG00000036545	Adamts2	1.69738	0.00267329
ENSMUSG00000023959	Clic5	1.71235	1.64545e-06
ENSMUSG00000042116	Vwa1	1.74608	1.52533e-28
ENSMUSG00000036446	Lum	1.79551	7.84155e-08
ENSMUSG00000022371	Col14a1	1.84278	9.03152e-08
ENSMUSG00000030116	Mfap5	1.87195	1.66319e-06
ENSMUSG00000000489	Pdgfb	1.9119	9.19562e-20
ENSMUSG00000028364	Tnc	1.98638	0.000650174
ENSMUSG00000016918	Sulf1	1.9964	2.33589e-08
ENSMUSG00000043631	Ecm2	2.03917	4.59366e-06
ENSMUSG00000019929	Dcn	2.12323	1.64919e-32
ENSMUSG00000032243	Itga11	2.19564	1.67668e-08
ENSMUSG00000031740	Mmp2	2.25507	6.52622e-06
ENSMUSG00000035258	Abi3bp	2.2729	5.44593e-14
ENSMUSG00000058806	Col13a1	2.31242	0.000178714
ENSMUSG00000032332	Col12a1	2.51519	7.77279e-05
ENSMUSG00000046618	Olfml2a	2.55614	1.97163e-14
ENSMUSG00000036356	Csgalnact1	2.65745	3.63548e-12
ENSMUSG00000028339	Col15a1	2.77067	2.93079e-38
ENSMUSG00000021806	Nid2	2.8311	1.9434e-32
ENSMUSG00000023886	Smoc2	2.93114	1.1464e-15
ENSMUSG00000031990	Jam3	2.95189	5.84327e-07
ENSMUSG00000041559	Fmod	2.95462	8.41832e-08
ENSMUSG00000060572	Mfap2	2.98619	1.64341e-08
ENSMUSG00000006369	Fbln1	3.06652	4.00708e-26
ENSMUSG00000001029	Icam2	3.2114	8.62669e-27
ENSMUSG00000026814	Eng	3.23719	8.73711e-79
ENSMUSG00000043613	Mmp3	3.28525	9.96666e-30
ENSMUSG00000053626	Tll1	3.42967	6.68856e-06
ENSMUSG00000062960	Kdr	3.47984	2.95273e-52
ENSMUSG00000020717	Pecam1	3.49175	1.10107e-84
ENSMUSG00000001506	Col1a1	3.56686	2.53399e-08
ENSMUSG00000029661	Col1a2	3.59333	1.19787e-08
ENSMUSG00000028111	Ctsk	3.67977	2.67312e-41
ENSMUSG00000001240	Ramp2	3.8115	1.01161e-46
ENSMUSG00000001930	Vwf	4.07262	2.22728e-118
ENSMUSG00000042436	Mfap4	4.24057	5.48252e-10
ENSMUSG00000091345	Col6a5	4.41622	2.39203e-05
ENSMUSG00000030111	A2m	5.14485	6.62855e-07
ENSMUSG00000074934	Grem1	5.95949	3.87759e-06
ENSMUSG00000025889	Snca	6.79156	1.42676e-12
Lymphocyte differentiation
ENSMUSG00000052889	Prkcb	-3.26837	0.000467384
ENSMUSG00000032021	Crtam	-2.95246	0.00745991
ENSMUSG00000037202	Prf1	-2.79657	0.000941095
ENSMUSG00000026700	Tnfsf4	-2.72587	0.00303398
ENSMUSG00000026070	Il18r1	-2.66862	0.00211033
ENSMUSG00000029204	Rhoh	-2.39656	0.0064008
ENSMUSG00000023927	Satb1	-2.30946	0.00324958
ENSMUSG00000029075	Tnfrsf4	-2.26774	0.00884559
ENSMUSG00000031165	Was	-2.25698	0.0047091
ENSMUSG00000034116	Vav1	-2.17079	0.00125652
ENSMUSG00000004709	Cd244	-2.10801	0.00471804
ENSMUSG00000001444	Tbx21	-2.07255	0.00786219
ENSMUSG00000020573	Pik3cg	-2.0181	0.00137023
ENSMUSG00000032446	Eomes	-2.00449	7.48437e-05
ENSMUSG00000032076	Cadm1	-1.97993	2.19692e-13
ENSMUSG00000039748	Exo1	-1.8354	0.00959188
ENSMUSG00000005672	Kit	-1.59624	1.1377e-20
ENSMUSG00000032202	Rab27a	-1.46909	0.000207558
ENSMUSG00000025001	Hells	-1.1502	5.10373e-06
ENSMUSG00000032238	Rora	-1.02711	0.000127937
ENSMUSG00000021678	F2rl1	-0.928303	0.000326567
ENSMUSG00000033454	Zbtb1	-0.874493	6.426e-05
ENSMUSG00000049551	Fzd9	-0.852969	0.0024236
ENSMUSG00000033792	Atp7a	-0.797679	0.000114024
ENSMUSG00000039942	Ptger4	-0.793093	0.00014894
ENSMUSG00000052085	Dock8	-0.737939	0.00126313
ENSMUSG00000075376	Rc3h2	-0.734228	1.97253e-06
ENSMUSG00000051412	Vamp7	-0.722344	0.00094728
ENSMUSG00000002413	Braf	-0.668871	0.000772828
ENSMUSG00000035992	Fnip1	-0.660415	0.000237956
ENSMUSG00000015605	Srf	-0.659362	9.8867e-07
ENSMUSG00000041417	Pik3r1	-0.649571	5.43992e-07
ENSMUSG00000032216	Nedd4	-0.573748	4.79496e-07
ENSMUSG00000062949	Atp11c	-0.571553	0.00182544
ENSMUSG00000000078	Klf6	-0.502404	4.99731e-05
ENSMUSG00000027506	Tpd52	-0.478315	0.000367667
ENSMUSG00000020894	Vamp2	-0.470199	0.00143739
ENSMUSG00000053841	Txlna	-0.402729	0.00195974
ENSMUSG00000020644	Id2	-0.391693	0.000306483
ENSMUSG00000076431	Sox4	-0.391471	0.000205022
ENSMUSG00000006932	Ctnnb1	-0.384046	0.0010481
ENSMUSG00000015619	Gata3	0.553957	0.00231734
ENSMUSG00000031897	Psmb10	0.555974	4.85856e-06
ENSMUSG00000032966	Fkbp1a	0.589065	7.55046e-07
ENSMUSG00000025510	Cd151	0.684944	6.38087e-11
ENSMUSG00000024659	Anxa1	0.750773	0.000358181
ENSMUSG00000046718	Bst2	0.761982	1.55591e-09
ENSMUSG00000049577	Zfpm1	0.77933	0.00286386
ENSMUSG00000024778	Fas	0.829689	2.46487e-06
ENSMUSG00000002983	Relb	0.843946	3.01571e-10
ENSMUSG00000014599	Csf1	0.897024	5.0409e-11
ENSMUSG00000003873	Bax	1.11383	1.62026e-31
ENSMUSG00000036856	Wnt4	1.29691	0.00519744
ENSMUSG00000031712	Il15	1.38635	4.08212e-10
ENSMUSG00000027962	Vcam1	1.41378	2.95747e-20
ENSMUSG00000034634	Ly6d	1.51296	4.33943e-27
ENSMUSG00000027314	Dll4	3.2615	9.40997e-38
RNA and ribosome processes
ENSMUSG00000003452	Bicd1	-2.34951	1.54201e-08
ENSMUSG00000029075	Tnfrsf4	-2.26774	0.00884559
ENSMUSG00000020183	Cpm	-1.69324	2.43575e-06
ENSMUSG00000027035	Cers6	-1.54519	0.00511341
ENSMUSG00000022949	Clic6	-1.49485	8.42115e-16
ENSMUSG00000040276	Pacsin1	-1.48503	0.00385817
ENSMUSG00000001763	Tspan33	-1.41189	0.000383817
ENSMUSG00000026576	Atp1b1	-1.28319	4.15292e-14
ENSMUSG00000029359	Tesc	-1.23351	1.20916e-09
ENSMUSG00000027603	Ggt7	-1.20404	0.0040404
ENSMUSG00000022512	Cldn1	-1.10253	2.14759e-05
ENSMUSG00000030091	Nup210	-0.958864	0.00273836
ENSMUSG00000020300	Cpeb4	-0.953357	1.88683e-06
ENSMUSG00000020623	Map2k6	-0.931572	0.00718485
ENSMUSG00000046329	Slc25a23	-0.920157	2.45546e-05
ENSMUSG00000001542	Ell2	-0.842186	1.85898e-06
ENSMUSG00000028565	Nfia	-0.84137	1.26308e-05
ENSMUSG00000032449	Slc25a36	-0.837555	2.32262e-09
ENSMUSG00000069601	Ank3	-0.819191	0.0068842
ENSMUSG00000032097	Ddx6	-0.802027	1.87413e-08
ENSMUSG00000033685	Ucp2	-0.800356	1.40625e-05
ENSMUSG00000044303	Cdkn2a	-0.799446	8.3022e-05
ENSMUSG00000026317	Cln8	-0.791471	0.000414495
ENSMUSG00000022797	Tfrc	-0.78813	6.87945e-09
ENSMUSG00000030055	Rab43	-0.76575	0.00198
ENSMUSG00000051412	Vamp7	-0.722344	0.00094728
ENSMUSG00000023845	Lnpep	-0.713176	0.000950001
ENSMUSG00000041058	Wwp1	-0.712723	8.02865e-05
ENSMUSG00000022200	Golph3	-0.709925	1.88902e-07
ENSMUSG00000018362	Kpna2	-0.703301	6.59852e-05
ENSMUSG00000034610	Zcchc11	-0.680464	0.000499032
ENSMUSG00000035064	Eef2k	-0.678226	0.00171345
ENSMUSG00000002413	Braf	-0.668871	0.000772828
ENSMUSG00000021466	Ptch1	-0.660076	0.000435966
ENSMUSG00000035161	Ints6	-0.648925	0.000347591
ENSMUSG00000029823	Luc7l2	-0.646663	4.92088e-09
ENSMUSG00000025792	Slc25a10	-0.624281	0.000190506
ENSMUSG00000015002	Efr3a	-0.622436	3.47207e-07
ENSMUSG00000045103	Dmd	-0.605569	0.000275872
ENSMUSG00000037475	Thoc2	-0.5973	0.000290081
ENSMUSG00000021282	Eif5	-0.587777	7.84155e-08
ENSMUSG00000024290	Rock1	-0.565576	0.000538927
ENSMUSG00000020594	Pum2	-0.561562	5.43905e-06
ENSMUSG00000031601	Cnot7	-0.551018	2.47953e-06
ENSMUSG00000020962	Gtf2a1	-0.547542	0.00391114
ENSMUSG00000022562	Oplah	-0.544384	0.00854786
ENSMUSG00000028484	Psip1	-0.541059	0.000916787
ENSMUSG00000011960	Ccnt1	-0.540961	0.0043354
ENSMUSG00000020280	Pus10	-0.531204	0.00162622
ENSMUSG00000032410	Xrn1	-0.530939	0.00289738
ENSMUSG00000018068	Ints2	-0.528831	0.000800434
ENSMUSG00000027366	Sppl2a	-0.513285	1.3897e-05
ENSMUSG00000021377	Dek	-0.505778	0.00586003
ENSMUSG00000021112	Mpp5	-0.505715	0.00478594
ENSMUSG00000037643	Prkci	-0.505156	0.000829229
ENSMUSG00000020063	Sirt1	-0.500882	0.00473315
ENSMUSG00000027087	Itgav	-0.49413	1.0378e-06
ENSMUSG00000027828	Ssr3	-0.486406	2.03963e-07
ENSMUSG00000026819	Slc25a25	-0.483704	0.00193329
ENSMUSG00000025531	Chm	-0.471684	0.00681291
ENSMUSG00000020894	Vamp2	-0.470199	0.00143739
ENSMUSG00000021258	Ccnk	-0.457564	0.00934978
ENSMUSG00000040511	Pvr	-0.455354	0.000247073
ENSMUSG00000028552	Eps15	-0.453087	0.000223511
ENSMUSG00000020863	Luc7l3	-0.442045	5.51644e-06
ENSMUSG00000027598	Itch	-0.44134	1.77292e-05
ENSMUSG00000025982	Sf3b1	-0.441322	0.000149424
ENSMUSG00000020733	Slc9a3r1	-0.432382	0.000552037
ENSMUSG00000005198	Polr2a	-0.42942	0.0037309
ENSMUSG00000024360	Etf1	-0.426558	0.000378424
ENSMUSG00000020780	Srp68	-0.416834	0.00116886
ENSMUSG00000028676	Srsf10	-0.410706	0.000360601
ENSMUSG00000079614	Seh1l	-0.409944	0.00735325
ENSMUSG00000025935	Tram1	-0.395474	0.00324958
ENSMUSG00000005506	Celf1	-0.385606	0.000443161
ENSMUSG00000021427	Ssr1	-0.384344	0.00151529
ENSMUSG00000027782	Kpna4	-0.377329	0.00549826
ENSMUSG00000025239	Limd1	-0.365622	0.00369469
ENSMUSG00000038708	Golga4	-0.357142	0.00658634
ENSMUSG00000005610	Eif4g2	-0.353854	0.000447814
ENSMUSG00000004980	Hnrnpa2b1	-0.350463	0.00990283
ENSMUSG00000025162	Csnk1d	-0.329008	0.000339322
ENSMUSG00000031600	Vps37a	-0.325785	0.00745991
ENSMUSG00000009741	Ubp1	-0.318881	0.007578
ENSMUSG00000030530	Furin	-0.301853	0.00842866
ENSMUSG00000059796	Eif4a1	-0.296874	0.000440981
ENSMUSG00000001440	Kpnb1	-0.28258	0.00634549
ENSMUSG00000029390	Tmed2	-0.282299	0.00534532
ENSMUSG00000016554	Eif3d	0.276759	0.00662898
ENSMUSG00000033047	Eif3l	0.315127	0.00439125
ENSMUSG00000029430	Ran	0.317161	0.00832986
ENSMUSG00000024308	Tapbp	0.3285	0.00622744
ENSMUSG00000068739	Sars	0.328561	0.000556518
ENSMUSG00000008348	Ubc	0.338872	0.000432572
ENSMUSG00000025362	Rps26	0.340355	0.0024236
ENSMUSG00000030432	Rpl28	0.346719	0.0021205
ENSMUSG00000033916	Chmp2a	0.354318	0.00148268
ENSMUSG00000008682	Rpl10	0.354448	0.00606657
ENSMUSG00000053565	Eif3k	0.356847	0.00315771
ENSMUSG00000026209	Dnpep	0.360773	0.00508361
ENSMUSG00000060036	Rpl3	0.364255	0.00493623
ENSMUSG00000024735	Prpf19	0.364915	0.00181918
ENSMUSG00000052456	Asna1	0.365359	0.00347999
ENSMUSG00000012405	Rpl15	0.366992	0.00328296
ENSMUSG00000018040	Rrp7a	0.369202	0.0030195
ENSMUSG00000000902	Smarcb1	0.379429	0.00586003
ENSMUSG00000025917	Cops5	0.381656	0.00775561
ENSMUSG00000025858	Get4	0.383671	0.0081343
ENSMUSG00000009549	Srp14	0.385184	0.00377479
ENSMUSG00000023944	Hsp90ab1	0.387247	9.93156e-05
ENSMUSG00000017404	Rpl19	0.387355	0.00869849
ENSMUSG00000022817	Itgb5	0.389199	0.0019583
ENSMUSG00000019505	Ubb	0.390221	6.90863e-07
ENSMUSG00000028234	Rps20	0.399498	0.0067549
ENSMUSG00000019432	Ddx39b	0.400596	0.000272663
ENSMUSG00000038812	Trmt112	0.40495	0.00626206
ENSMUSG00000038274	Fau	0.407582	0.00980262
ENSMUSG00000022962	Gart	0.409515	0.00247585
ENSMUSG00000058600	Rpl30	0.411939	0.00236046
ENSMUSG00000059070	Rpl18	0.414377	0.00322435
ENSMUSG00000015714	Cers2	0.420482	6.45818e-05
ENSMUSG00000063856	Gpx1	0.422732	0.00980262
ENSMUSG00000031320	Rps4x	0.423077	2.16166e-05
ENSMUSG00000069020	Urm1	0.423859	0.00781111
ENSMUSG00000045128	Rpl18a	0.425511	0.000131514
ENSMUSG00000006333	Rps9	0.429869	0.00285127
ENSMUSG00000022538	Lsg1	0.431968	0.00255462
ENSMUSG00000001909	Trmt1	0.43413	0.0043354
ENSMUSG00000029547	Ints1	0.435525	0.00196597
ENSMUSG00000007029	Vars	0.438162	0.000482897
ENSMUSG00000071644	Eef1g	0.439868	6.36797e-06
ENSMUSG00000003970	Rpl8	0.439959	5.08119e-05
ENSMUSG00000055762	Eef1d	0.441313	0.000179616
ENSMUSG00000025260	Hsd17b10	0.445011	0.00477369
ENSMUSG00000042426	Dhx29	0.445295	0.00647312
ENSMUSG00000003429	Rps11	0.44934	0.00202769
ENSMUSG00000026427	Eif2d	0.450929	0.00017089
ENSMUSG00000024312	Wdr46	0.458846	0.00879282
ENSMUSG00000021939	Ctsb	0.462249	0.000466511
ENSMUSG00000037563	Rps16	0.462821	0.00370368
ENSMUSG00000034892	Rps29	0.464386	0.000571208
ENSMUSG00000012848	Rps5	0.468301	0.000498349
ENSMUSG00000029507	Pus1	0.470252	0.0041525
ENSMUSG00000023043	Krt18	0.47115	0.00293415
ENSMUSG00000030341	Tnfrsf1a	0.473455	4.84141e-05
ENSMUSG00000004667	Polr2e	0.47457	0.000631559
ENSMUSG00000026269	Rnpepl1	0.4748	3.45815e-05
ENSMUSG00000000555	Itga5	0.482705	0.000204318
ENSMUSG00000059714	Flot1	0.489248	0.000286949
ENSMUSG00000073702	Rpl31	0.493751	0.00924958
ENSMUSG00000027133	Nop10	0.494852	0.00629032
ENSMUSG00000025068	Gsto1	0.5018	0.00284481
ENSMUSG00000036199	Ndufa13	0.504843	0.000200413
ENSMUSG00000025208	Mrpl43	0.505004	0.00492337
ENSMUSG00000025508	Rplp2	0.505483	0.000682426
ENSMUSG00000025264	Tsr2	0.514406	0.00292902
ENSMUSG00000041841	Rpl37	0.515185	0.00346147
ENSMUSG00000008373	Prpf31	0.520181	8.94561e-05
ENSMUSG00000045948	Mrps12	0.524939	0.00302897
ENSMUSG00000037805	Rpl10a	0.528107	0.000650783
ENSMUSG00000035754	Wdr18	0.532051	0.000567154
ENSMUSG00000008668	Rps18	0.532462	0.00550009
ENSMUSG00000004929	Thop1	0.533214	0.00127183
ENSMUSG00000060803	Gstp1	0.541521	0.00268963
ENSMUSG00000007041	Clic1	0.541795	3.36265e-07
ENSMUSG00000032288	Imp3	0.542283	0.000488225
ENSMUSG00000052146	Rps10	0.545515	0.00228475
ENSMUSG00000027613	Eif6	0.549873	0.000336232
ENSMUSG00000031584	Gsr	0.551141	0.00600155
ENSMUSG00000035206	Sppl2b	0.551151	0.000551159
ENSMUSG00000026641	Usf1	0.552059	0.000186932
ENSMUSG00000044533	Rps2	0.555594	0.00176018
ENSMUSG00000000740	Rpl13	0.555874	6.40952e-07
ENSMUSG00000042660	Wdr55	0.559094	0.00140178
ENSMUSG00000040414	Slc25a28	0.560168	0.000356153
ENSMUSG00000044709	Gemin7	0.560402	0.0035347
ENSMUSG00000024644	Cndp2	0.561612	0.00406894
ENSMUSG00000040824	Snrpd2	0.56447	0.0018727
ENSMUSG00000015647	Lama5	0.566702	0.0039676
ENSMUSG00000063457	Rps15	0.572838	3.68189e-05
ENSMUSG00000024902	Mrpl11	0.575411	0.00602498
ENSMUSG00000079435	Rpl36a	0.578068	2.32287e-06
ENSMUSG00000033020	Polr2f	0.579847	0.000829571
ENSMUSG00000019822	Smpd2	0.584007	7.00195e-05
ENSMUSG00000067288	Rps28	0.58498	0.000707644
ENSMUSG00000002767	Mrpl2	0.586845	0.000220605
ENSMUSG00000039680	Mrps6	0.587986	0.00185927
ENSMUSG00000010755	Cars	0.58912	0.000680651
ENSMUSG00000020692	Nle1	0.594684	0.00480888
ENSMUSG00000046330	Rpl37a	0.597927	0.000195867
ENSMUSG00000022982	Sod1	0.602211	8.5838e-07
ENSMUSG00000025875	Tspan17	0.603094	0.0041525
ENSMUSG00000031072	Oraov1	0.605599	0.00279937
ENSMUSG00000024339	Tap2	0.608368	1.99345e-05
ENSMUSG00000029392	Rilpl1	0.609809	0.00871047
ENSMUSG00000013846	St3gal1	0.610762	0.00030002
ENSMUSG00000025371	Chmp6	0.618175	3.50778e-05
ENSMUSG00000031749	St3gal2	0.628764	0.00250287
ENSMUSG00000061787	Rps17	0.629065	1.65987e-05
ENSMUSG00000024436	Mrps18b	0.630883	8.02114e-05
ENSMUSG00000001056	Nhp2	0.631275	0.000169948
ENSMUSG00000028998	Tomm7	0.635983	0.00139775
ENSMUSG00000011837	Snapc2	0.636242	0.004074
ENSMUSG00000024158	Hagh	0.636447	0.000347815
ENSMUSG00000013629	Cad	0.638677	0.000116226
ENSMUSG00000034321	Exosc1	0.639149	0.0039415
ENSMUSG00000034259	Exosc4	0.639507	0.00854397
ENSMUSG00000016833	Mrps18c	0.640084	0.00471331
ENSMUSG00000062997	Rpl35	0.650142	0.000435966
ENSMUSG00000031490	Eif4ebp1	0.652475	0.00692827
ENSMUSG00000010406	Mrpl52	0.656843	0.000124939
ENSMUSG00000079641	Rpl39	0.658279	0.0021685
ENSMUSG00000093674	Rpl41	0.662417	0.000325192
ENSMUSG00000051557	Pusl1	0.665214	0.0040404
ENSMUSG00000037772	Mrpl23	0.667673	0.0043636
ENSMUSG00000032359	Ctsh	0.672106	0.000131525
ENSMUSG00000028010	Gar1	0.672171	0.000637917
ENSMUSG00000036678	Aaas	0.674395	5.39545e-07
ENSMUSG00000023051	Tarbp2	0.677258	0.00285127
ENSMUSG00000061983	Rps12	0.70079	0.00322435
ENSMUSG00000074182	Znhit6	0.720597	0.000494471
ENSMUSG00000057863	Rpl36	0.721162	0.000292649
ENSMUSG00000035863	Palm	0.735806	0.00819772
ENSMUSG00000027076	Timm10	0.7423	0.00162916
ENSMUSG00000024683	Mrpl16	0.745533	2.77339e-05
ENSMUSG00000039221	Rpl22l1	0.756284	0.00224868
ENSMUSG00000055912	Tmem150a	0.763854	0.00134509
ENSMUSG00000010047	Hyal2	0.76465	0.000184574
ENSMUSG00000014980	Tsen15	0.769622	0.00439203
ENSMUSG00000062006	Rpl34	0.774309	0.00145155
ENSMUSG00000040952	Rps19	0.775529	5.47507e-05
ENSMUSG00000021567	Nkd2	0.784931	0.00116328
ENSMUSG00000040605	Bace2	0.786479	0.00349932
ENSMUSG00000061286	Exosc5	0.793546	0.000428514
ENSMUSG00000019987	Arg1	0.796339	0.000664903
ENSMUSG00000007610	Gtpbp3	0.811425	1.24758e-05
ENSMUSG00000076441	Ass1	0.833705	6.07755e-08
ENSMUSG00000022842	Ece2	0.850933	0.00597919
ENSMUSG00000028538	St3gal3	0.85482	1.7622e-08
ENSMUSG00000024401	Tnf	0.891032	4.75181e-06
ENSMUSG00000001300	Efnb2	0.896164	0.000176866
ENSMUSG00000032231	Anxa2	0.918627	8.3463e-06
ENSMUSG00000022386	Trmu	0.951935	5.75642e-05
ENSMUSG00000036781	Rps27l	0.999284	2.50177e-05
ENSMUSG00000037031	Tspan15	1.02587	0.00164343
ENSMUSG00000032038	St3gal4	1.04327	0.000226809
ENSMUSG00000002083	Bbc3	1.07749	7.98471e-16
ENSMUSG00000003873	Bax	1.11383	1.62026e-31
ENSMUSG00000041959	S100a10	1.11928	4.40581e-08
ENSMUSG00000057530	Ece1	1.12803	1.6646e-18
ENSMUSG00000090877	Hspa1b	1.14591	5.47967e-07
ENSMUSG00000031451	Gas6	1.21424	8.51722e-27
ENSMUSG00000037852	Cpe	1.22988	2.19326e-06
ENSMUSG00000064326	Siva1	1.23711	7.18817e-08
ENSMUSG00000036856	Wnt4	1.29691	0.00519744
ENSMUSG00000006344	Ggt5	1.31728	0.00606875
ENSMUSG00000021266	Wars	1.39732	4.13359e-17
ENSMUSG00000040562	Gstm2	1.43539	0.00610098
ENSMUSG00000019278	Dpep1	1.4399	0.00142211
ENSMUSG00000037936	Scarb1	1.44587	6.32565e-21
ENSMUSG00000073002	Vamp5	1.6111	1.02384e-11
ENSMUSG00000007655	Cav1	1.66191	1.91923e-36
ENSMUSG00000023959	Clic5	1.71235	1.64545e-06
ENSMUSG00000091971	Hspa1a	1.76238	1.80845e-10
ENSMUSG00000024713	Pcsk5	1.76366	3.8349e-06
ENSMUSG00000035202	Lars2	1.95557	0.000398141
ENSMUSG00000003418	St8sia6	2.15442	0.000381484
ENSMUSG00000025978	Rftn2	2.28575	3.08677e-05
ENSMUSG00000020658	Efr3b	2.30098	7.46736e-07
ENSMUSG00000025586	Cpeb1	2.5086	0.00322096
ENSMUSG00000026442	Nfasc	2.53348	8.65103e-09
ENSMUSG00000063632	Sox11	2.70145	0.00100773
ENSMUSG00000020473	Aebp1	3.18178	2.89435e-12
ENSMUSG00000052316	Lrrc15	3.23032	8.36851e-05
ENSMUSG00000027408	Cpxm1	3.29643	5.997e-28
ENSMUSG00000034997	Htr2a	3.44063	0.00351417
ENSMUSG00000036596	Cpz	3.61701	7.89049e-13
ENSMUSG00000058966	Fam57b	3.83035	0.00178047
ENSMUSG00000066319	Rtp3	4.81432	1.59365e-06
ENSMUSG00000039037	St6galnac5	5.05606	0.00730647
ENSMUSG00000051839	Gypa	5.41477	0.0016473
ENSMUSG00000030862	Cpxm2	5.47698	1.33598e-42
Blood pressure and heart regulation
ENSMUSG00000033831	Fgb	-3.17492	2.4252e-12
ENSMUSG00000057880	Abat	-1.8794	0.00145228
ENSMUSG00000022376	Adcy8	-1.65022	2.15722e-07
ENSMUSG00000023951	Vegfa	-1.3628	6.82995e-21
ENSMUSG00000022309	Angpt1	-1.34039	0.00285126
ENSMUSG00000026576	Atp1b1	-1.28319	4.15292e-14
ENSMUSG00000027030	Stk39	-1.21663	4.35513e-18
ENSMUSG00000046410	Kcnk6	-1.06299	0.00956132
ENSMUSG00000019997	Ctgf	-1.00789	7.57723e-13
ENSMUSG00000020623	Map2k6	-0.931572	0.00718485
ENSMUSG00000021678	F2rl1	-0.928303	0.000326567
ENSMUSG00000051359	Ncald	-0.881353	4.17156e-05
ENSMUSG00000041688	Amot	-0.855119	0.000139572
ENSMUSG00000025314	Ptprj	-0.809057	4.42275e-06
ENSMUSG00000039942	Ptger4	-0.793093	0.00014894
ENSMUSG00000026360	Rgs2	-0.730951	0.00242948
ENSMUSG00000023845	Lnpep	-0.713176	0.000950001
ENSMUSG00000022292	Rrm2b	-0.70193	0.000650174
ENSMUSG00000014932	Yes1	-0.634352	0.00277517
ENSMUSG00000020612	Prkar1a	-0.610457	2.48017e-06
ENSMUSG00000045103	Dmd	-0.605569	0.000275872
ENSMUSG00000045962	Wnk1	-0.582566	1.89861e-05
ENSMUSG00000019970	Sgk1	-0.57124	5.51379e-09
ENSMUSG00000050627	Gpd1l	-0.551112	0.000768867
ENSMUSG00000021109	Hif1a	-0.531436	0.00405927
ENSMUSG00000032601	Prkar2a	-0.481751	0.00032892
ENSMUSG00000030660	Pik3c2a	-0.47476	0.00617447
ENSMUSG00000029467	Atp2a2	-0.432455	0.000268144
ENSMUSG00000020733	Slc9a3r1	-0.432382	0.000552037
ENSMUSG00000020644	Id2	-0.391693	0.000306483
ENSMUSG00000027665	Pik3ca	-0.374743	0.00283187
ENSMUSG00000024913	Lrp5	-0.363476	0.00254213
ENSMUSG00000006818	Sod2	0.40375	0.00101761
ENSMUSG00000063856	Gpx1	0.422732	0.00980262
ENSMUSG00000026104	Stat1	0.48612	0.000269441
ENSMUSG00000015619	Gata3	0.553957	0.00231734
ENSMUSG00000038260	Trpm4	0.563632	0.00117539
ENSMUSG00000075254	Heg1	0.57811	9.77239e-05
ENSMUSG00000022982	Sod1	0.602211	8.5838e-07
ENSMUSG00000000326	Comt	0.616858	7.3003e-07
ENSMUSG00000006800	Sulf2	0.626532	3.25052e-06
ENSMUSG00000059895	Ptp4a3	0.69683	9.79183e-05
ENSMUSG00000018042	Cyb5r3	0.728379	5.38543e-10
ENSMUSG00000010047	Hyal2	0.76465	0.000184574
ENSMUSG00000022505	Emp2	0.809759	1.90246e-13
ENSMUSG00000049791	Fzd4	0.811825	0.00823471
ENSMUSG00000031778	Cx3cl1	0.826649	9.62983e-11
ENSMUSG00000031558	Slit2	0.827394	0.000447485
ENSMUSG00000024778	Fas	0.829689	2.46487e-06
ENSMUSG00000061119	Prcp	0.879007	0.000906242
ENSMUSG00000062991	Nrg1	0.975129	0.00341831
ENSMUSG00000021190	Lgmn	1.04105	0.00271543
ENSMUSG00000037010	Apln	1.0818	1.61942e-05
ENSMUSG00000057530	Ece1	1.12803	1.6646e-18
ENSMUSG00000031451	Gas6	1.21424	8.51722e-27
ENSMUSG00000020826	Nos2	1.2433	0.00116328
ENSMUSG00000048612	Myof	1.2454	4.31025e-07
ENSMUSG00000042284	Itga1	1.29622	2.98882e-06
ENSMUSG00000029084	Cd38	1.29915	0.00822559
ENSMUSG00000032135	Mcam	1.31783	1.56856e-13
ENSMUSG00000000530	Acvrl1	1.41373	7.79152e-09
ENSMUSG00000031520	Vegfc	1.52552	1.66699e-13
ENSMUSG00000026418	Tnni1	1.61911	0.000322634
ENSMUSG00000007655	Cav1	1.66191	1.91923e-36
ENSMUSG00000022367	Has2	1.6636	1.14861e-05
ENSMUSG00000033278	Ptprm	1.67801	4.58491e-15
ENSMUSG00000024713	Pcsk5	1.76366	3.8349e-06
ENSMUSG00000014813	Stc1	1.77531	1.6347e-06
ENSMUSG00000009545	Kcnq1	1.84905	3.72342e-05
ENSMUSG00000000489	Pdgfb	1.9119	9.19562e-20
ENSMUSG00000016918	Sulf1	1.9964	2.33589e-08
ENSMUSG00000032860	P2ry2	2.06739	5.48809e-08
ENSMUSG00000041324	Inhba	2.13667	2.2156e-16
ENSMUSG00000040118	Cacna2d1	2.15573	0.000290351
ENSMUSG00000019194	Scn1b	2.18018	8.28058e-19
ENSMUSG00000023224	Serping1	2.30322	1.12187e-20
ENSMUSG00000061353	Cxcl12	2.36433	2.49523e-26
ENSMUSG00000021367	Edn1	2.41259	3.96055e-09
ENSMUSG00000006386	Tek	2.88608	9.22132e-22
ENSMUSG00000026814	Eng	3.23719	8.73711e-79
ENSMUSG00000027314	Dll4	3.2615	9.40997e-38
ENSMUSG00000016494	Cd34	3.34044	7.04683e-60
ENSMUSG00000036437	Npy1r	3.34576	0.00871296
ENSMUSG00000021536	Adcy2	3.38775	2.36931e-05
ENSMUSG00000034997	Htr2a	3.44063	0.00351417
ENSMUSG00000000320	Alox12	3.51095	4.06111e-06
ENSMUSG00000030043	Tacr1	3.52888	1.94361e-33
ENSMUSG00000029661	Col1a2	3.59333	1.19787e-08
ENSMUSG00000001240	Ramp2	3.8115	1.01161e-46
ENSMUSG00000036144	Meox2	3.82812	1.82413e-16
ENSMUSG00000057123	Gja5	3.85001	1.58427e-21
ENSMUSG00000004655	Aqp1	3.91978	1.06763e-59
ENSMUSG00000053004	Hrh1	4.07762	0.00366791
ENSMUSG00000021070	Bdkrb2	4.1107	0.00011212
ENSMUSG00000021194	Chga	4.28949	0.000128551
ENSMUSG00000022220	Adcy4	4.55424	2.576e-52
ENSMUSG00000045534	Kcna5	4.5764	0.00328101
ENSMUSG00000028978	Nos3	4.63072	6.53291e-59
Growh factor signaling
ENSMUSG00000029306	Ibsp	-4.46225	8.03294e-06
ENSMUSG00000052889	Prkcb	-3.26837	0.000467384
ENSMUSG00000022483	Col2a1	-3.26595	0.000571662
ENSMUSG00000026573	Xcl1	-2.58931	0.00232127
ENSMUSG00000030849	Fgfr2	-2.28994	3.9697e-24
ENSMUSG00000027715	Ccna2	-1.83627	1.34879e-06
ENSMUSG00000041540	Sox5	-1.6683	1.35377e-08
ENSMUSG00000022322	Shcbp1	-1.64828	0.00259261
ENSMUSG00000026768	Itga8	-1.59972	1.92395e-05
ENSMUSG00000033730	Egr3	-1.46706	6.7713e-10
ENSMUSG00000036169	Sostdc1	-1.46594	6.13673e-05
ENSMUSG00000023951	Vegfa	-1.3628	6.82995e-21
ENSMUSG00000028967	Errfi1	-1.35487	8.39998e-10
ENSMUSG00000023034	Nr4a1	-1.27225	1.77553e-09
ENSMUSG00000051379	Flrt3	-1.17626	1.99804e-08
ENSMUSG00000036040	Adamtsl2	-1.13228	0.00179785
ENSMUSG00000055254	Ntrk2	-1.12781	5.04813e-14
ENSMUSG00000037664	Cdkn1c	-1.11804	0.00166796
ENSMUSG00000022676	Snai2	-1.01393	0.000506859
ENSMUSG00000019997	Ctgf	-1.00789	7.57723e-13
ENSMUSG00000022114	Spry2	-0.996114	1.00443e-11
ENSMUSG00000027490	E2f1	-0.897824	0.000152865
ENSMUSG00000040998	Npnt	-0.882995	0.000129098
ENSMUSG00000061436	Hipk2	-0.872473	2.0864e-05
ENSMUSG00000010051	Hyal1	-0.846843	0.00650226
ENSMUSG00000040152	Thbs1	-0.83637	3.27027e-07
ENSMUSG00000039910	Cited2	-0.834888	1.68643e-10
ENSMUSG00000027660	Skil	-0.814306	0.00240794
ENSMUSG00000034342	Cbl	-0.777691	0.00138686
ENSMUSG00000054252	Fgfr3	-0.758283	0.00293574
ENSMUSG00000023845	Lnpep	-0.713176	0.000950001
ENSMUSG00000019960	Dusp6	-0.689035	4.91553e-06
ENSMUSG00000035064	Eef2k	-0.678226	0.00171345
ENSMUSG00000028195	Cyr61	-0.650862	1.02384e-11
ENSMUSG00000014932	Yes1	-0.634352	0.00277517
ENSMUSG00000007613	Tgfbr1	-0.625635	0.000835094
ENSMUSG00000028228	Cpne3	-0.622779	1.02171e-06
ENSMUSG00000045103	Dmd	-0.605569	0.000275872
ENSMUSG00000027187	Cat	-0.604065	4.62065e-06
ENSMUSG00000022812	Gsk3b	-0.586881	1.47404e-05
ENSMUSG00000032216	Nedd4	-0.573748	4.79496e-07
ENSMUSG00000004099	Dnmt1	-0.565708	0.00541746
ENSMUSG00000040481	Bptf	-0.554036	0.00194693
ENSMUSG00000031010	Usp9x	-0.538953	0.00726345
ENSMUSG00000021109	Hif1a	-0.531436	0.00405927
ENSMUSG00000024122	Pdpk1	-0.514868	0.00081119
ENSMUSG00000042046	Dstyk	-0.511149	0.0006559
ENSMUSG00000040728	Esrp1	-0.509803	5.41011e-05
ENSMUSG00000025860	Xiap	-0.50849	0.0060964
ENSMUSG00000020063	Sirt1	-0.500882	0.00473315
ENSMUSG00000033411	Ctdspl2	-0.500185	0.00858285
ENSMUSG00000022205	Sub1	-0.494521	0.00606684
ENSMUSG00000007850	Hnrnph1	-0.486904	8.20302e-09
ENSMUSG00000084128	Esrp2	-0.486157	0.00354736
ENSMUSG00000038844	Kif16b	-0.485436	0.00545603
ENSMUSG00000042207	Kdm5b	-0.48514	0.000524515
ENSMUSG00000020715	Ern1	-0.465229	0.000791674
ENSMUSG00000032217	Rnf111	-0.454257	0.000865804
ENSMUSG00000039646	Vasn	-0.43609	0.00855025
ENSMUSG00000022346	Myc	-0.432746	0.00349497
ENSMUSG00000024098	Twsg1	-0.432244	0.000694019
ENSMUSG00000005198	Polr2a	-0.42942	0.0037309
ENSMUSG00000037465	Klf10	-0.4272	0.0060791
ENSMUSG00000045671	Spred2	-0.419582	0.00433202
ENSMUSG00000006930	Hap1	-0.415464	0.00615323
ENSMUSG00000033014	Trim33	-0.413177	0.00686844
ENSMUSG00000018160	Med1	-0.405497	0.00358394
ENSMUSG00000032340	Neo1	-0.395006	0.00664154
ENSMUSG00000006932	Ctnnb1	-0.384046	0.0010481
ENSMUSG00000032633	Flcn	-0.372089	0.00233714
ENSMUSG00000042079	Hnrnpf	-0.369461	0.00680508
ENSMUSG00000020516	Rps6kb1	-0.356768	0.00431919
ENSMUSG00000025162	Csnk1d	-0.329008	0.000339322
ENSMUSG00000030530	Furin	-0.301853	0.00842866
ENSMUSG00000026878	Rab14	-0.289213	0.00393092
ENSMUSG00000063065	Mapk3	0.323403	0.00824409
ENSMUSG00000008348	Ubc	0.338872	0.000432572
ENSMUSG00000022817	Itgb5	0.389199	0.0019583
ENSMUSG00000019505	Ubb	0.390221	6.90863e-07
ENSMUSG00000026201	Stk16	0.433012	0.00443837
ENSMUSG00000020184	Mdm2	0.461455	0.000829571
ENSMUSG00000039615	Stub1	0.4621	0.00307268
ENSMUSG00000004667	Polr2e	0.47457	0.000631559
ENSMUSG00000000555	Itga5	0.482705	0.000204318
ENSMUSG00000010376	Nedd8	0.509404	0.000466068
ENSMUSG00000011658	Fuz	0.513872	0.00289869
ENSMUSG00000060803	Gstp1	0.541521	0.00268963
ENSMUSG00000005087	Cd44	0.54807	1.42485e-05
ENSMUSG00000015619	Gata3	0.553957	0.00231734
ENSMUSG00000033020	Polr2f	0.579847	0.000829571
ENSMUSG00000020307	Cdc34	0.585035	2.55105e-06
ENSMUSG00000032966	Fkbp1a	0.589065	7.55046e-07
ENSMUSG00000027293	Ehd4	0.589351	2.76337e-06
ENSMUSG00000026836	Acvr1	0.61982	4.48244e-05
ENSMUSG00000006800	Sulf2	0.626532	3.25052e-06
ENSMUSG00000013629	Cad	0.638677	0.000116226
ENSMUSG00000037035	Inhbb	0.661957	2.027e-05
ENSMUSG00000059895	Ptp4a3	0.69683	9.79183e-05
ENSMUSG00000025351	Cd63	0.704645	4.75036e-06
ENSMUSG00000026193	Fn1	0.708912	0.00277517
ENSMUSG00000031548	Sfrp1	0.713953	0.00323011
ENSMUSG00000022414	Tab1	0.727504	0.00184096
ENSMUSG00000022098	Bmp1	0.731948	0.000184574
ENSMUSG00000010047	Hyal2	0.76465	0.000184574
ENSMUSG00000068329	Htra2	0.774635	4.55131e-05
ENSMUSG00000019987	Arg1	0.796339	0.000664903
ENSMUSG00000049791	Fzd4	0.811825	0.00823471
ENSMUSG00000029231	Pdgfra	0.817162	0.00498144
ENSMUSG00000031558	Slit2	0.827394	0.000447485
ENSMUSG00000024778	Fas	0.829689	2.46487e-06
ENSMUSG00000024911	Fibp	0.851892	9.91689e-08
ENSMUSG00000031586	Rbpms	0.85706	0.000207618
ENSMUSG00000031955	Bcar1	0.867792	3.88668e-07
ENSMUSG00000002020	Ltbp2	0.879923	0.00275242
ENSMUSG00000004951	Hspb1	0.894926	5.51478e-08
ENSMUSG00000026728	Vim	0.919615	1.68781e-05
ENSMUSG00000020108	Ddit4	0.952135	7.82665e-09
ENSMUSG00000038508	Gdf15	0.997001	0.00345764
ENSMUSG00000073802	Cdkn2b	1.05265	0.000890135
ENSMUSG00000029484	Anxa3	1.20939	6.60443e-08
ENSMUSG00000031451	Gas6	1.21424	8.51722e-27
ENSMUSG00000024238	Zeb1	1.2438	0.000224587
ENSMUSG00000048612	Myof	1.2454	4.31025e-07
ENSMUSG00000026072	Il1r1	1.28955	4.72383e-08
ENSMUSG00000036856	Wnt4	1.29691	0.00519744
ENSMUSG00000027204	Fbn1	1.37186	2.14449e-05
ENSMUSG00000006205	Htra1	1.38809	0.000103371
ENSMUSG00000032363	Adamts7	1.39551	3.21747e-05
ENSMUSG00000000530	Acvrl1	1.41373	7.79152e-09
ENSMUSG00000027962	Vcam1	1.41378	2.95747e-20
ENSMUSG00000040488	Ltbp4	1.52291	2.79562e-16
ENSMUSG00000031520	Vegfc	1.52552	1.66699e-13
ENSMUSG00000018593	Sparc	1.53936	1.10748e-08
ENSMUSG00000031503	Col4a2	1.54955	2.18438e-09
ENSMUSG00000022816	Fstl1	1.5772	0.00520754
ENSMUSG00000027996	Sfrp2	1.62598	2.88249e-08
ENSMUSG00000022150	Dab2	1.63469	6.05779e-10
ENSMUSG00000007655	Cav1	1.66191	1.91923e-36
ENSMUSG00000022367	Has2	1.6636	1.14861e-05
ENSMUSG00000030562	Nox4	1.76882	6.28407e-08
ENSMUSG00000025969	Nrp2	1.76923	1.82099e-21
ENSMUSG00000027208	Fgf7	1.79398	0.00521466
ENSMUSG00000036446	Lum	1.79551	7.84155e-08
ENSMUSG00000000489	Pdgfb	1.9119	9.19562e-20
ENSMUSG00000024168	Tmem204	1.92154	1.62388e-08
ENSMUSG00000028364	Tnc	1.98638	0.000650174
ENSMUSG00000016918	Sulf1	1.9964	2.33589e-08
ENSMUSG00000032006	Pdgfd	2.04548	2.8991e-11
ENSMUSG00000030782	Tgfb1i1	2.06073	6.26992e-07
ENSMUSG00000032860	P2ry2	2.06739	5.48809e-08
ENSMUSG00000031283	Chrdl1	2.09132	0.000600033
ENSMUSG00000037095	Lrg1	2.09856	4.58997e-29
ENSMUSG00000019929	Dcn	2.12323	1.64919e-32
ENSMUSG00000041324	Inhba	2.13667	2.2156e-16
ENSMUSG00000041120	Nbl1	2.15248	3.84927e-15
ENSMUSG00000025784	Clec3b	2.16078	0.00820636
ENSMUSG00000029096	Htra3	2.17991	6.25344e-08
ENSMUSG00000037362	Nov	2.21768	2.4178e-09
ENSMUSG00000033585	Ndn	2.25198	0.000266482
ENSMUSG00000022469	Rapgef3	2.35939	1.08707e-11
ENSMUSG00000029648	Flt1	2.36664	7.02498e-21
ENSMUSG00000021367	Edn1	2.41259	3.96055e-09
ENSMUSG00000020357	Flt4	2.4254	1.05371e-15
ENSMUSG00000092035	Peg10	2.44075	0.00105546
ENSMUSG00000031465	Angpt2	2.50388	7.90606e-16
ENSMUSG00000046186	Cd109	2.53206	1.591e-32
ENSMUSG00000023078	Cxcl13	2.59967	0.00320005
ENSMUSG00000020176	Grb10	2.63589	2.26198e-19
ENSMUSG00000009097	Tbx1	2.64931	0.00126015
ENSMUSG00000063632	Sox11	2.70145	0.00100773
ENSMUSG00000000120	Ngfr	2.76087	0.000169106
ENSMUSG00000021388	Aspn	2.82029	2.83861e-07
ENSMUSG00000041559	Fmod	2.95462	8.41832e-08
ENSMUSG00000026814	Eng	3.23719	8.73711e-79
ENSMUSG00000027314	Dll4	3.2615	9.40997e-38
ENSMUSG00000062960	Kdr	3.47984	2.95273e-52
ENSMUSG00000001506	Col1a1	3.56686	2.53399e-08
ENSMUSG00000050069	Grem2	3.57927	4.94546e-10
ENSMUSG00000029661	Col1a2	3.59333	1.19787e-08
ENSMUSG00000031871	Cdh5	3.70371	6.54506e-78
ENSMUSG00000030772	Dkk3	3.73314	1.04677e-15
ENSMUSG00000001240	Ramp2	3.8115	1.01161e-46
ENSMUSG00000027684	Mecom	3.8336	6.12208e-18
ENSMUSG00000041378	Cldn5	3.90821	3.97175e-32
ENSMUSG00000027500	Stmn2	4.0186	3.48485e-06
ENSMUSG00000041445	Mmrn2	4.14331	6.37011e-117
ENSMUSG00000074934	Grem1	5.95949	3.87759e-06
ENSMUSG00000000182	Fgf23	5.99041	0.000370142
ENSMUSG00000025889	Snca	6.79156	1.42676e-12
Chromatin remodeling
ENSMUSG00000052889	Prkcb	-3.26837	0.000467384
ENSMUSG00000028927	Padi2	-2.47717	1.3897e-05
ENSMUSG00000020914	Top2a	-2.37821	5.62415e-15
ENSMUSG00000023927	Satb1	-2.30946	0.00324958
ENSMUSG00000026605	Cenpf	-2.27919	7.14065e-08
ENSMUSG00000041431	Ccnb1	-2.11846	4.23559e-05
ENSMUSG00000047146	Tet1	-1.99049	1.40133e-06
ENSMUSG00000015880	Ncapg	-1.95814	9.1562e-05
ENSMUSG00000024791	Cdca5	-1.94191	0.000546475
ENSMUSG00000020649	Rrm2	-1.83616	2.24774e-06
ENSMUSG00000027306	Nusap1	-1.76522	0.00026454
ENSMUSG00000020897	Aurkb	-1.73342	0.00113741
ENSMUSG00000017146	Brca1	-1.71231	0.000414495
ENSMUSG00000029177	Cenpa	-1.69887	4.11959e-05
ENSMUSG00000027323	Rad51	-1.68559	2.88439e-05
ENSMUSG00000019942	Cdk1	-1.61918	8.78509e-07
ENSMUSG00000017716	Birc5	-1.4992	2.37741e-05
ENSMUSG00000045328	Cenpe	-1.48832	1.90455e-05
ENSMUSG00000036875	Dna2	-1.45276	0.00716526
ENSMUSG00000001228	Uhrf1	-1.44421	5.89512e-08
ENSMUSG00000023951	Vegfa	-1.3628	6.82995e-21
ENSMUSG00000028873	Cdca8	-1.32476	0.000293152
ENSMUSG00000041147	Brca2	-1.2912	0.00101476
ENSMUSG00000022360	Atad2	-1.26446	2.52001e-10
ENSMUSG00000005470	Asf1b	-1.25917	0.00279601
ENSMUSG00000028312	Smc2	-1.25202	8.96178e-06
ENSMUSG00000042029	Ncapg2	-1.21544	6.04181e-05
ENSMUSG00000005410	Mcm5	-1.19169	7.60004e-05
ENSMUSG00000044927	H1fx	-1.17219	0.00686844
ENSMUSG00000025001	Hells	-1.1502	5.10373e-06
ENSMUSG00000000861	Bcl11a	-1.13885	1.58481e-08
ENSMUSG00000034906	Ncaph	-1.1286	0.00357175
ENSMUSG00000033237	Arid2	-1.10393	2.39875e-15
ENSMUSG00000002870	Mcm2	-1.09561	0.000347435
ENSMUSG00000041859	Mcm3	-1.08794	0.000559255
ENSMUSG00000020893	Per1	-1.04792	7.83124e-08
ENSMUSG00000034329	Brip1	-1.04404	0.00316388
ENSMUSG00000029687	Ezh2	-1.03395	7.84155e-08
ENSMUSG00000022676	Snai2	-1.01393	0.000506859
ENSMUSG00000051817	Sox12	-0.999549	0.00127942
ENSMUSG00000038252	Ncapd2	-0.993194	2.90232e-07
ENSMUSG00000054717	Hmgb2	-0.969456	0.00067223
ENSMUSG00000039741	Bahcc1	-0.968695	0.000598818
ENSMUSG00000030091	Nup210	-0.958864	0.00273836
ENSMUSG00000035024	Ncapd3	-0.957354	2.83847e-05
ENSMUSG00000039989	Cbx4	-0.927407	1.636e-12
ENSMUSG00000033454	Zbtb1	-0.874493	6.426e-05
ENSMUSG00000039485	Tspyl4	-0.842674	0.00191821
ENSMUSG00000044303	Cdkn2a	-0.799446	8.3022e-05
ENSMUSG00000033792	Atp7a	-0.797679	0.000114024
ENSMUSG00000022673	Mcm4	-0.789042	0.00202631
ENSMUSG00000029673	Auts2	-0.775098	8.45213e-08
ENSMUSG00000037868	Egr2	-0.738917	0.000562918
ENSMUSG00000034832	Tet3	-0.728177	9.24194e-05
ENSMUSG00000040943	Tet2	-0.725659	3.19557e-05
ENSMUSG00000018476	Kdm6b	-0.708652	4.13059e-05
ENSMUSG00000048118	Arid4a	-0.691065	0.000132911
ENSMUSG00000029580	Actb	-0.675443	3.48925e-05
ENSMUSG00000037896	Rcor1	-0.65452	0.000209096
ENSMUSG00000020661	Dnmt3a	-0.637899	0.00010985
ENSMUSG00000035021	Baz1a	-0.635835	1.43865e-05
ENSMUSG00000031666	Rbl2	-0.630871	0.00778476
ENSMUSG00000059474	Mbtd1	-0.630506	5.0037e-05
ENSMUSG00000017548	Suz12	-0.624489	5.90424e-05
ENSMUSG00000070544	Top1	-0.609896	2.60659e-06
ENSMUSG00000030180	Kdm5a	-0.607162	0.00101476
ENSMUSG00000049516	Spty2d1	-0.604791	0.000734632
ENSMUSG00000062627	Mysm1	-0.600447	0.00496132
ENSMUSG00000029238	Clock	-0.597005	0.000387681
ENSMUSG00000029265	Dr1	-0.593697	0.00120812
ENSMUSG00000026896	Ifih1	-0.588484	9.97389e-06
ENSMUSG00000039219	Arid4b	-0.586952	1.67315e-06
ENSMUSG00000029267	Mtf2	-0.581487	0.000272648
ENSMUSG00000042323	Pbrm1	-0.577083	0.000241966
ENSMUSG00000026484	Rnf2	-0.572721	0.000630888
ENSMUSG00000037876	Jmjd1c	-0.568428	0.000402178
ENSMUSG00000031715	Smarca5	-0.567708	1.36393e-05
ENSMUSG00000004099	Dnmt1	-0.565708	0.00541746
ENSMUSG00000025862	Stag2	-0.563453	5.5555e-05
ENSMUSG00000053477	Tcf4	-0.560641	3.89614e-05
ENSMUSG00000038518	Jarid2	-0.560431	0.0060625
ENSMUSG00000026355	Mcm6	-0.555324	0.00444757
ENSMUSG00000040481	Bptf	-0.554036	0.00194693
ENSMUSG00000042390	Gatad2b	-0.548685	0.00316388
ENSMUSG00000028820	Sfpq	-0.547909	9.13327e-06
ENSMUSG00000037808	Fam76b	-0.537208	0.000488168
ENSMUSG00000028522	Mier1	-0.531015	0.000508302
ENSMUSG00000037286	Stag1	-0.530245	0.000616817
ENSMUSG00000050965	Prkca	-0.529226	0.000155781
ENSMUSG00000053470	Kdm3a	-0.524279	5.39408e-05
ENSMUSG00000018501	Ncor1	-0.517188	4.13851e-05
ENSMUSG00000022141	Nipbl	-0.514934	0.00323011
ENSMUSG00000038080	Kdm1b	-0.514275	0.00864791
ENSMUSG00000027104	Atf2	-0.51099	0.002404
ENSMUSG00000024431	Nr3c1	-0.510121	0.00252519
ENSMUSG00000037652	Phc3	-0.507591	0.00319277
ENSMUSG00000031229	Atrx	-0.506617	0.000249785
ENSMUSG00000021377	Dek	-0.505778	0.00586003
ENSMUSG00000020063	Sirt1	-0.500882	0.00473315
ENSMUSG00000096210	H1f0	-0.498078	0.000280651
ENSMUSG00000078671	Chd2	-0.489461	0.000423445
ENSMUSG00000072872	Rybp	-0.485214	0.00233273
ENSMUSG00000042207	Kdm5b	-0.48514	0.000524515
ENSMUSG00000032481	Smarcc1	-0.481495	4.52684e-05
ENSMUSG00000027630	Tbl1xr1	-0.476757	0.00903126
ENSMUSG00000069495	Epc2	-0.463207	0.00877237
ENSMUSG00000057637	Prdm2	-0.454366	0.00236046
ENSMUSG00000026361	Cdc73	-0.454315	0.00741066
ENSMUSG00000028693	Nasp	-0.44018	0.000361067
ENSMUSG00000022698	Naa50	-0.439556	0.000895551
ENSMUSG00000022346	Myc	-0.432746	0.00349497
ENSMUSG00000039852	Rere	-0.419429	0.00299841
ENSMUSG00000047777	Phf13	-0.419095	0.00355918
ENSMUSG00000007880	Arid1a	-0.412481	0.00443543
ENSMUSG00000079614	Seh1l	-0.409944	0.00735325
ENSMUSG00000022314	Rad21	-0.409161	0.00893038
ENSMUSG00000042506	Usp22	-0.403431	0.000273346
ENSMUSG00000016559	H3f3b	-0.388775	0.000131126
ENSMUSG00000006932	Ctnnb1	-0.384046	0.0010481
ENSMUSG00000032376	Usp3	-0.380424	0.00983658
ENSMUSG00000017485	Top2b	-0.380097	0.00741458
ENSMUSG00000058318	Phf21a	-0.378194	0.00449587
ENSMUSG00000040850	Psme4	-0.374967	0.000954666
ENSMUSG00000031095	Cul4b	-0.364379	0.00585751
ENSMUSG00000026918	Brd3	-0.361423	0.00753349
ENSMUSG00000001632	Brpf1	-0.351217	0.00843373
ENSMUSG00000052915	Msl1	-0.347107	0.000566754
ENSMUSG00000020390	Ube2b	-0.346861	0.00106817
ENSMUSG00000020738	Sumo2	-0.345581	0.00244631
ENSMUSG00000022387	Brd1	-0.345142	0.00304002
ENSMUSG00000042557	Sin3a	-0.335179	0.00849766
ENSMUSG00000025246	Tbl1x	-0.327693	0.00163906
ENSMUSG00000023852	Chd1	-0.32666	0.00610308
ENSMUSG00000034341	Wbp2	-0.323501	0.00946318
ENSMUSG00000018583	G3bp1	-0.254659	0.00771999
ENSMUSG00000013787	Ehmt2	0.259929	0.0092191
ENSMUSG00000063065	Mapk3	0.323403	0.00824409
ENSMUSG00000024335	Brd2	0.329822	0.00193114
ENSMUSG00000008348	Ubc	0.338872	0.000432572
ENSMUSG00000003099	Ppp5c	0.370251	0.00389326
ENSMUSG00000000902	Smarcb1	0.379429	0.00586003
ENSMUSG00000019505	Ubb	0.390221	6.90863e-07
ENSMUSG00000031820	Babam1	0.412643	0.00423239
ENSMUSG00000002319	Ipo4	0.423319	0.00447271
ENSMUSG00000053483	Usp21	0.436975	0.00161249
ENSMUSG00000080268	Brms1	0.444829	0.00479853
ENSMUSG00000020184	Mdm2	0.461455	0.000829571
ENSMUSG00000026803	Ttf1	0.46618	0.00791507
ENSMUSG00000024193	Phf1	0.468257	0.00681291
ENSMUSG00000026603	Smyd2	0.522581	0.00229768
ENSMUSG00000018909	Arrb1	0.522947	0.000268212
ENSMUSG00000024952	Rps6ka4	0.525844	1.0845e-05
ENSMUSG00000059518	Znhit1	0.547181	0.00161547
ENSMUSG00000015619	Gata3	0.553957	0.00231734
ENSMUSG00000028101	Pias3	0.554605	0.000727725
ENSMUSG00000038260	Trpm4	0.563632	0.00117539
ENSMUSG00000041264	Uspl1	0.567548	2.01881e-05
ENSMUSG00000053411	Cbx7	0.581716	9.25212e-05
ENSMUSG00000026181	Ppm1f	0.624189	5.1758e-06
ENSMUSG00000022475	Hdac7	0.637054	0.000201937
ENSMUSG00000036678	Aaas	0.674395	5.39545e-07
ENSMUSG00000031388	Naa10	0.684207	0.000652027
ENSMUSG00000068391	Chrac1	0.6948	0.00210292
ENSMUSG00000024659	Anxa1	0.750773	0.000358181
ENSMUSG00000026048	Ercc5	0.758235	3.11386e-08
ENSMUSG00000022779	Top3b	0.792109	4.60318e-11
ENSMUSG00000030166	Rad52	0.823171	0.00755013
ENSMUSG00000062906	Hdac10	0.86534	4.83469e-05
ENSMUSG00000032231	Anxa2	0.918627	8.3463e-06
ENSMUSG00000019982	Myb	0.958677	0.000631851
ENSMUSG00000041959	S100a10	1.11928	4.40581e-08
ENSMUSG00000034205	Loxl2	1.5535	2.6213e-05
ENSMUSG00000047821	Trim16	1.67546	4.4054e-08
ENSMUSG00000029913	Prdm5	2.17877	0.00699958
ENSMUSG00000027684	Mecom	3.8336	6.12208e-18
DNA replication and repair
ENSMUSG00000029275	Gfi1	-3.79586	0.0019469
ENSMUSG00000026700	Tnfsf4	-2.72587	0.00303398
ENSMUSG00000028927	Padi2	-2.47717	1.3897e-05
ENSMUSG00000034023	Fancd2	-2.39751	0.00188612
ENSMUSG00000020914	Top2a	-2.37821	5.62415e-15
ENSMUSG00000026605	Cenpf	-2.27919	7.14065e-08
ENSMUSG00000022034	Esco2	-2.25905	0.00520438
ENSMUSG00000042489	Clspn	-2.19859	8.20502e-05
[truncated: 695 more rows]
